# Supplementary material for: Association vs. Prediction: The Impact of Cortical Surface Smoothing and Parcellation on Brain Age
Source: Frontiers journal article supplement (doi:10.3389/fdata.2021.637724), 2021-05-04
Supplement: Data_Sheet_1.PDF [file Data_Sheet_1.PDF]

## Supplementary Material

### Supplementary Method – Estimating the number of resels:

Number of resolution elements (i.e. resel numbers) is defined to identify the independent elements of the statistical results. The resel numbers and roughness/smoothness of a map are dependent. In theory, resel numbers are defined as determinants of the variance-covariance matrix of the gradient of the component fields based on the statistical results (Worsley et al., 1992). However, in practice, Worsley et al. proposed a simplified estimation which is calculated across the edges across the surface for each of the statistical maps and provides a robust estimation of the resels (implemented in the SurfStat software <https://www.math.mcgill.ca/keith/surfstat/>). We have used this implementation to estimate resel numbers across smoothing and parcellation conditions for each statistical map.

### 1 Supplementary Figures

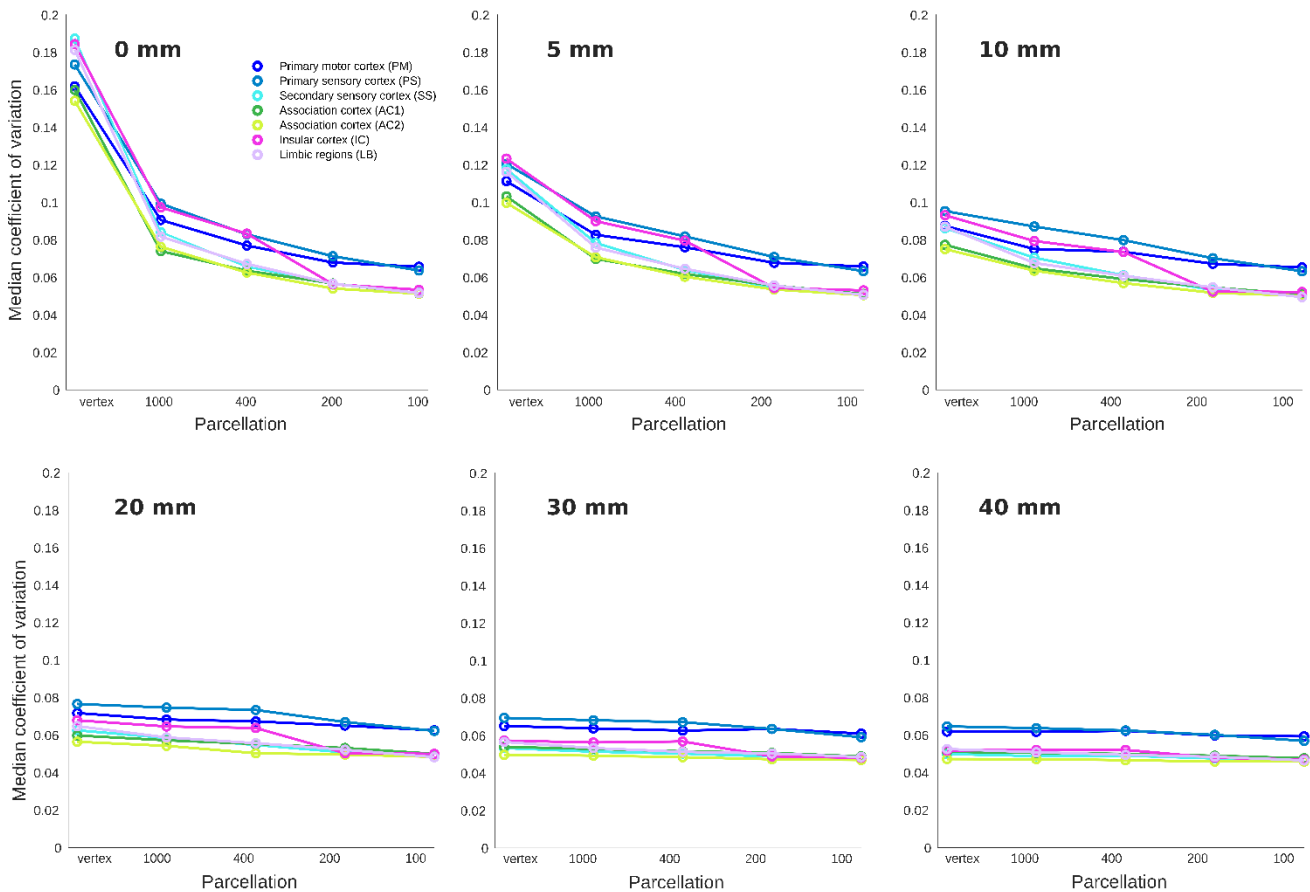

**Supplementary Figure 1.** Coefficient of variation (CV) shown for each cytoarchitectural region across parcellation and smoothing conditions.

**A)**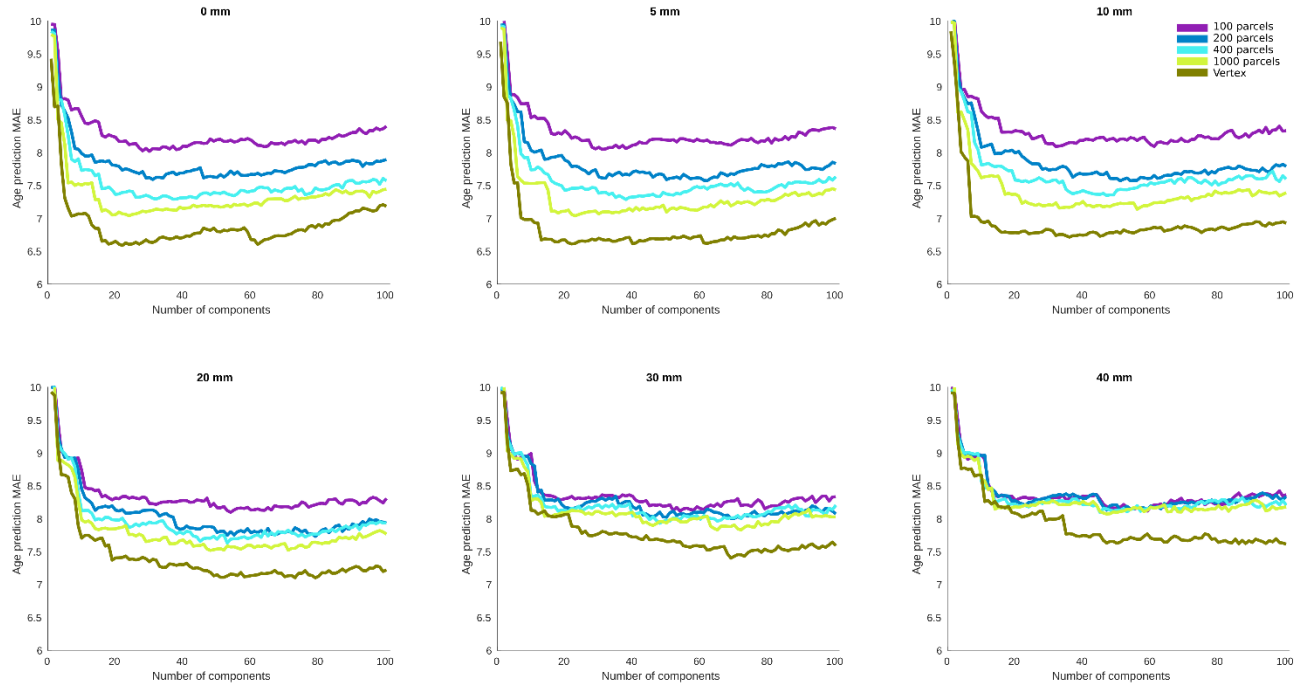**B)**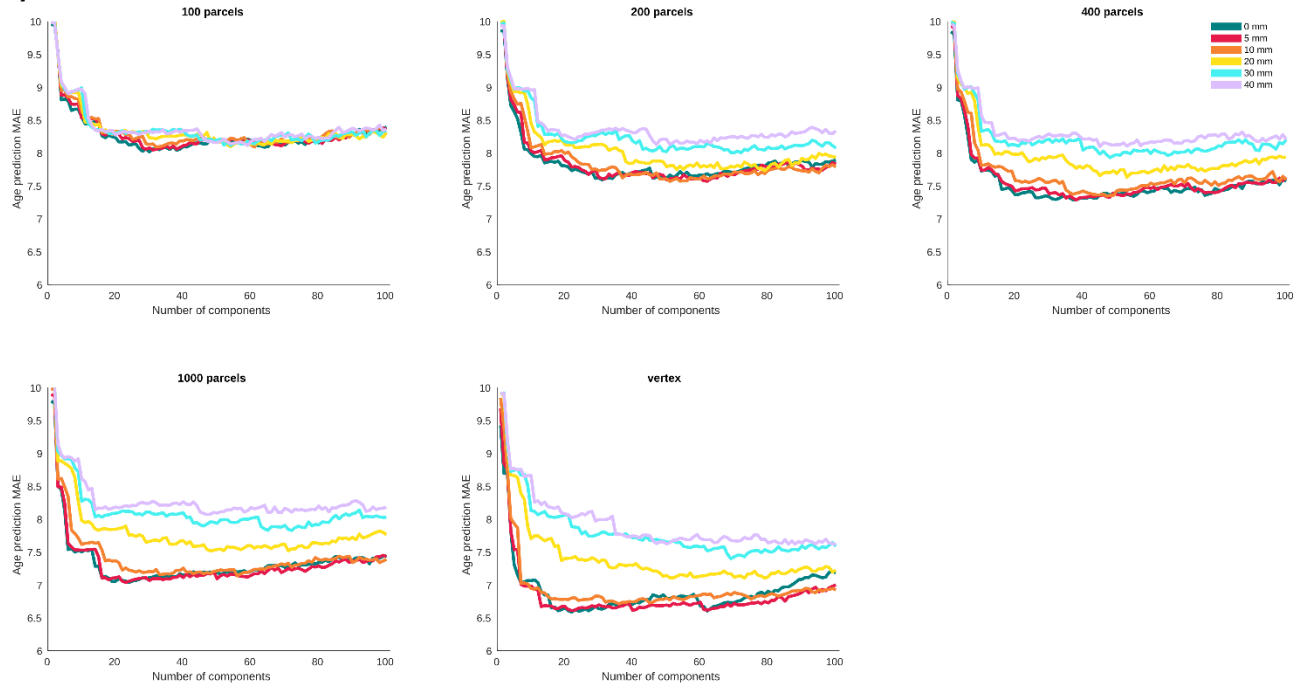

**Supplementary Figure 2.** Mean absolute error (MAE) for linear regression model. Age prediction as a function of number of principal components included as features in the predictive model. **A)** results grouped together based on the smoothing level. **B)** results grouped together based on the parcellation resolution.

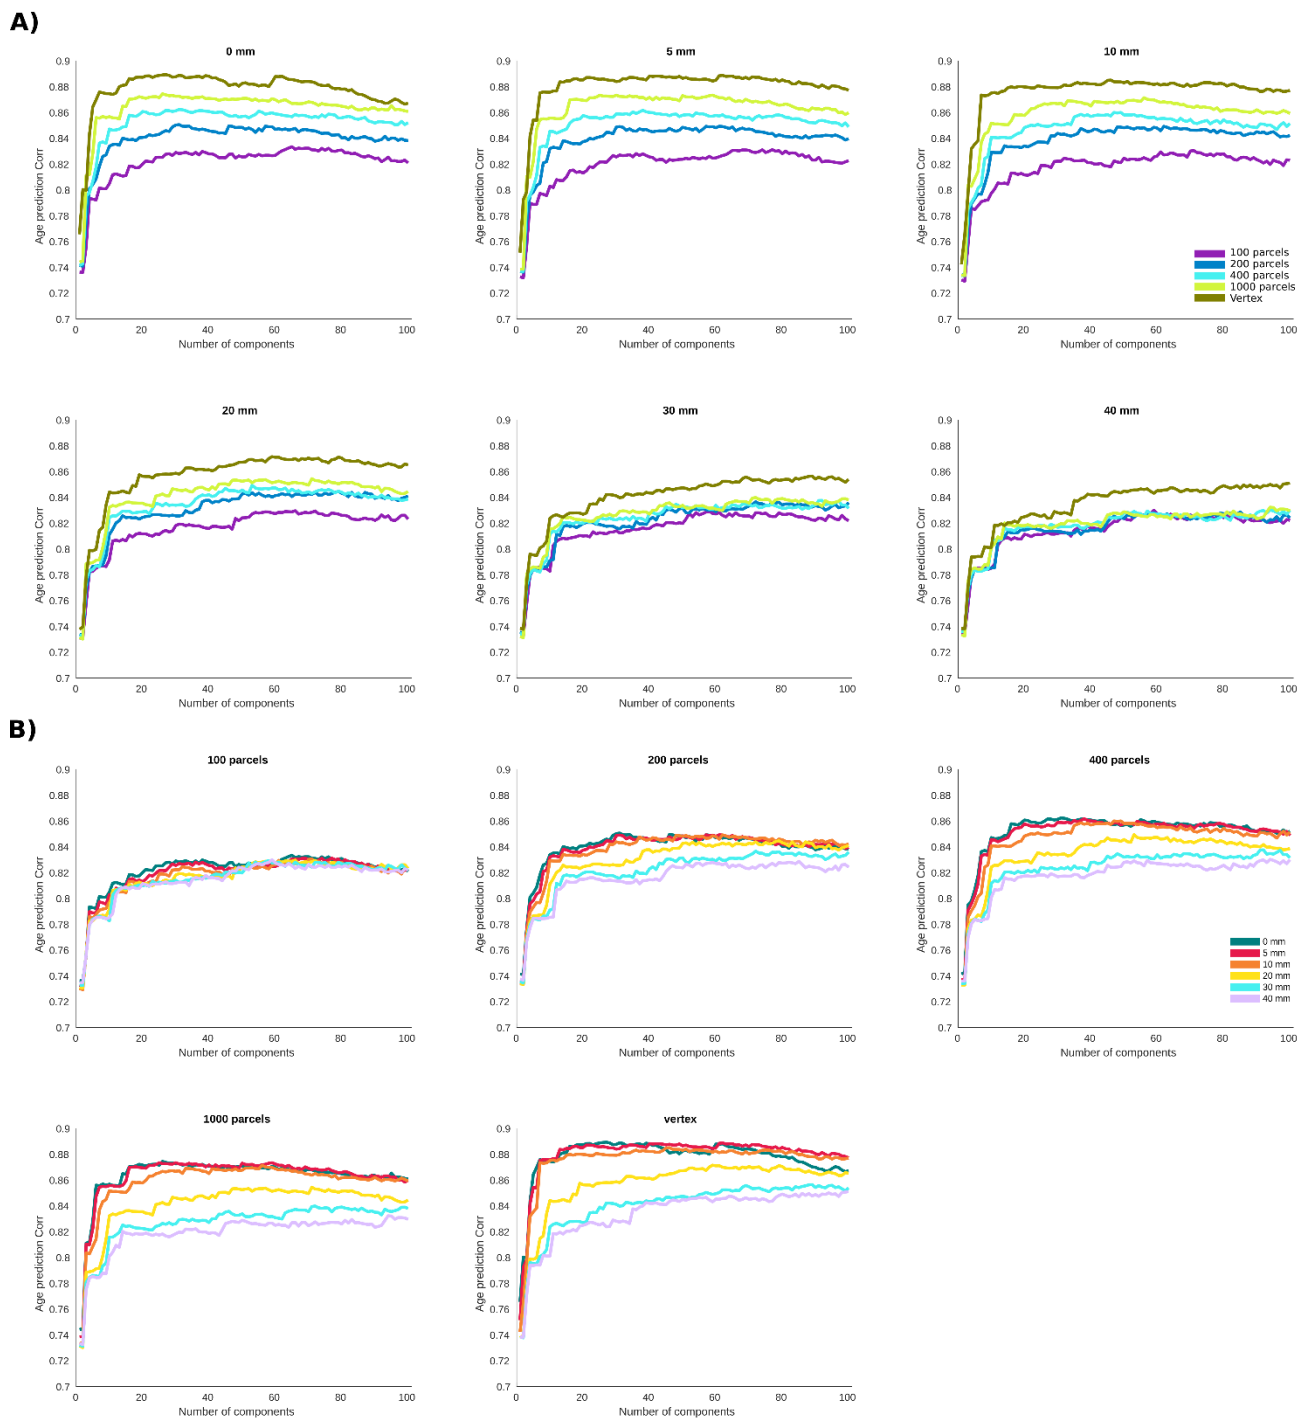

**Supplementary Figure 3.** Correlation between the predicted age and chronological age as a function of number of principal components included as features in the predictive model. **A)** results grouped together based on the smoothing level. **B)** results grouped together based on the parcellation resolution.

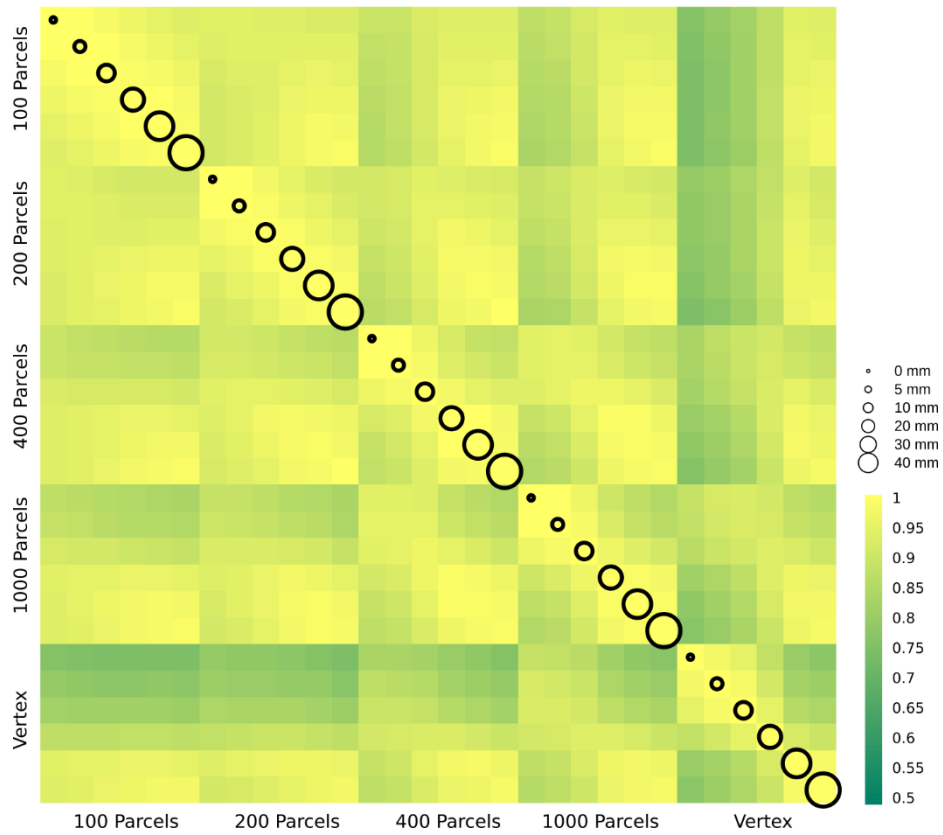

**Supplementary Figure 4.**  $\delta_1$  age prediction error. The correlation between delta age (as measured by  $\delta_1$ ) across parcellation resolutions (x axis labels) and smoothing kernels (represented by circle size).

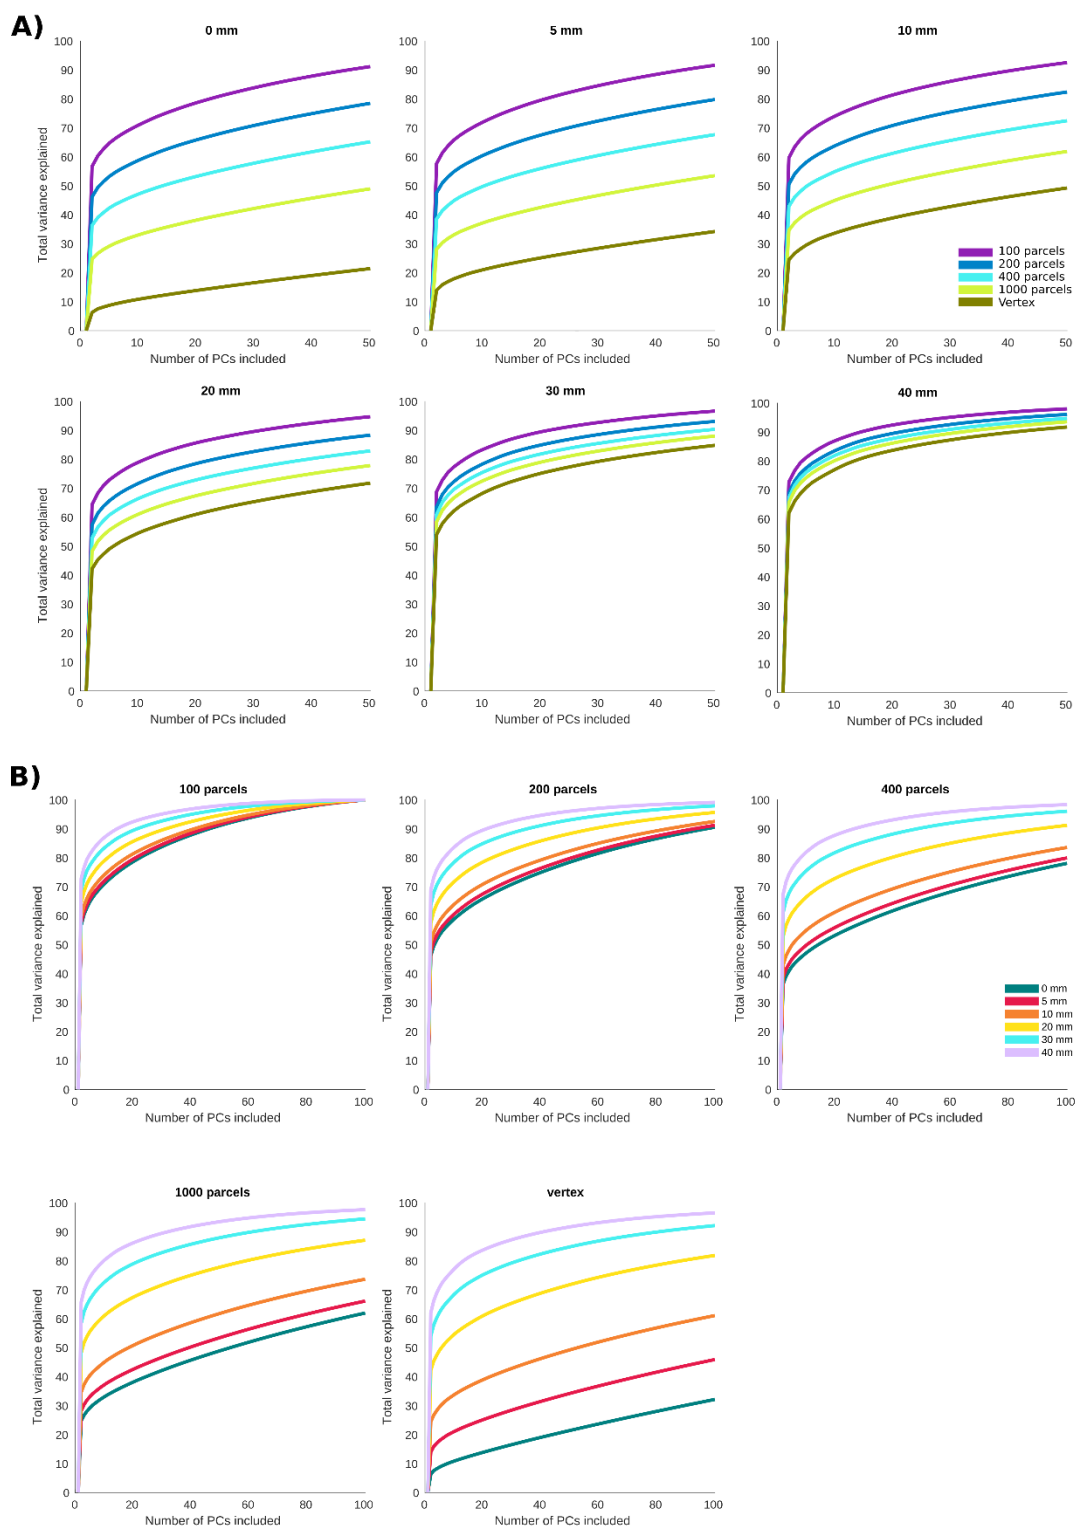

**Supplementary Figure 5.** Accumulated variance explained of cortical thickness by principal components for each smoothing/parcellation pair. **A)** results grouped together based on the smoothing level. **B)** results grouped together based on the parcellation resolution.

**A)**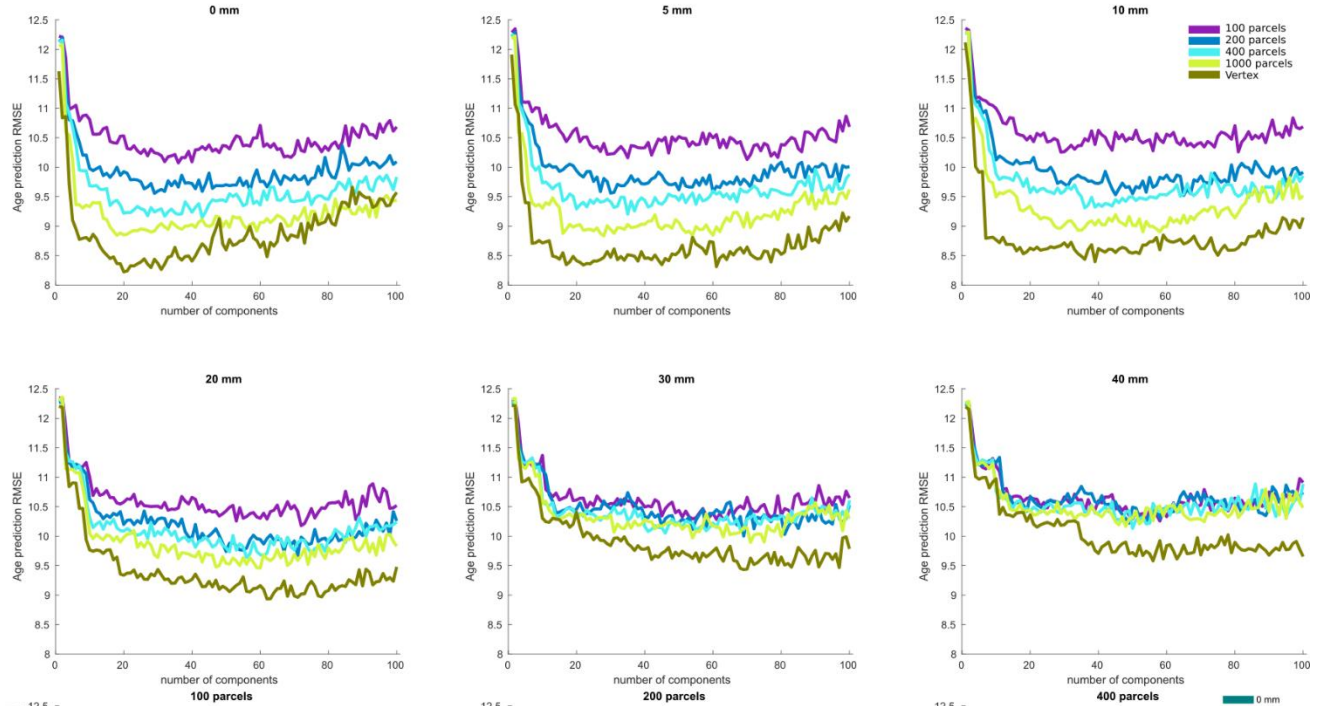**B)**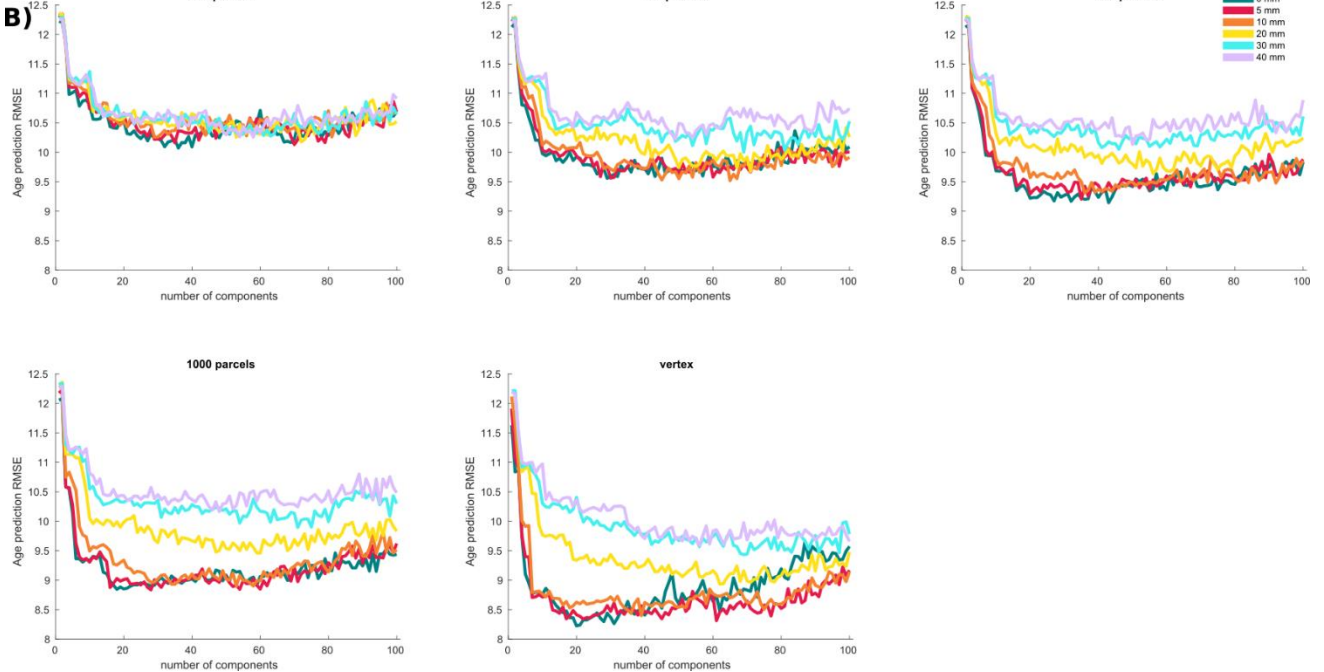

**Supplementary Figure 6.** Root mean square error (RMSE) for Age prediction using support vector machine regression model with linear kernel as a function of number of principal components included as features in the predictive model. **A)** results grouped together based on the smoothing level. **B)** results grouped together based on the parcellation resolution.

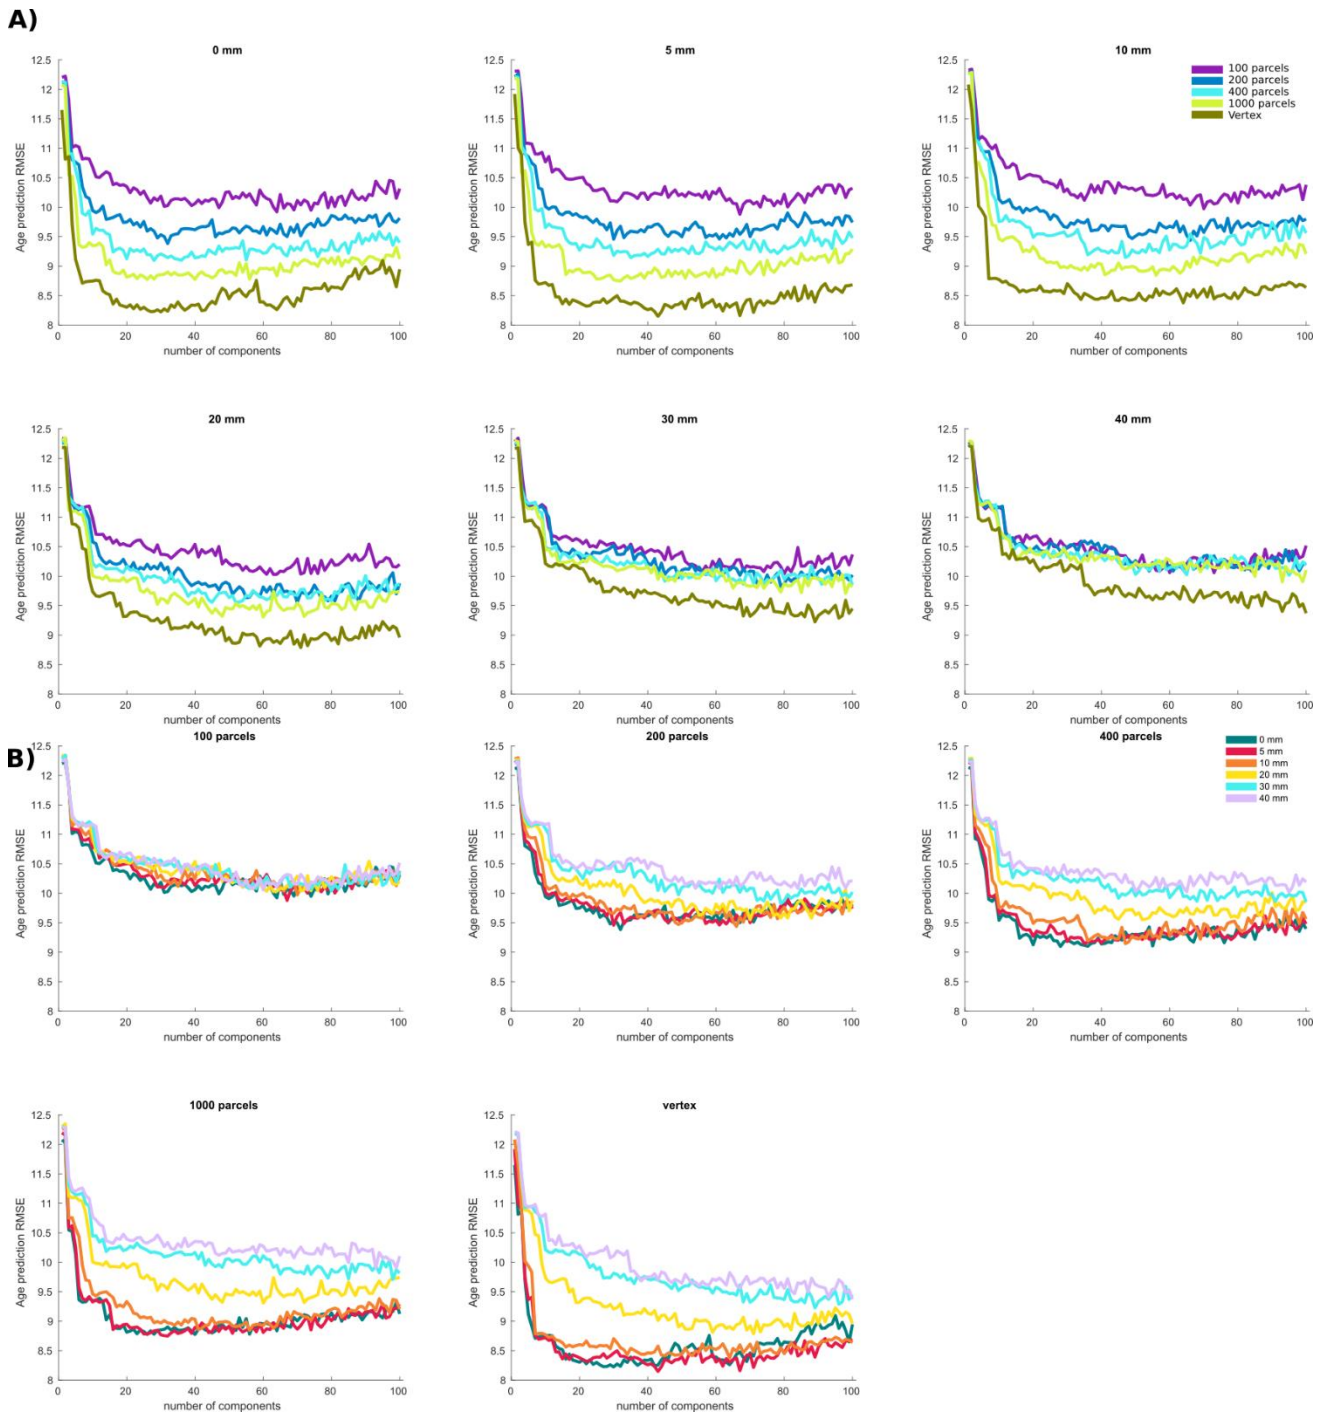

**Supplementary Figure 7.** Root mean square error (RMSE) for Age prediction using linear regression model with ridge regularization ( $\lambda = 0.0215$ ) as a function of number of principal components included as features in the predictive model. **A)** results grouped together based on the smoothing level. **B)** results grouped together based on the parcellation resolution.



**A)**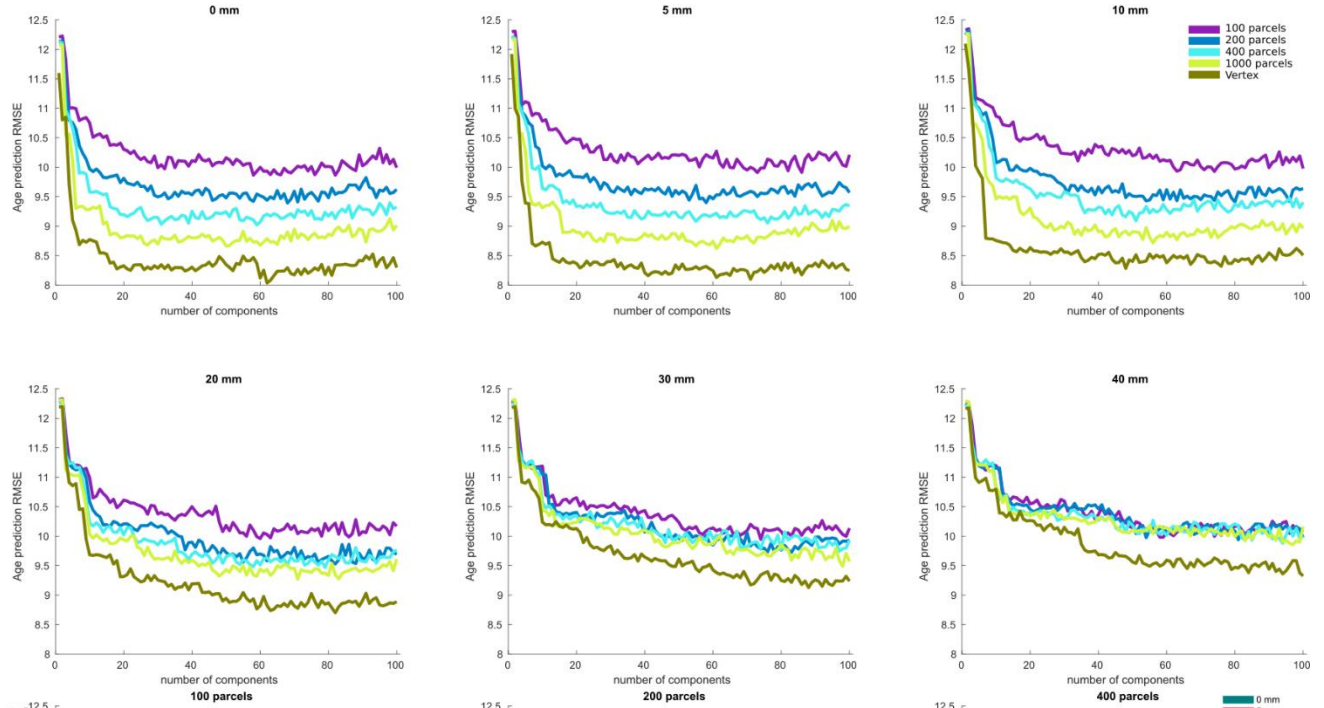**B)**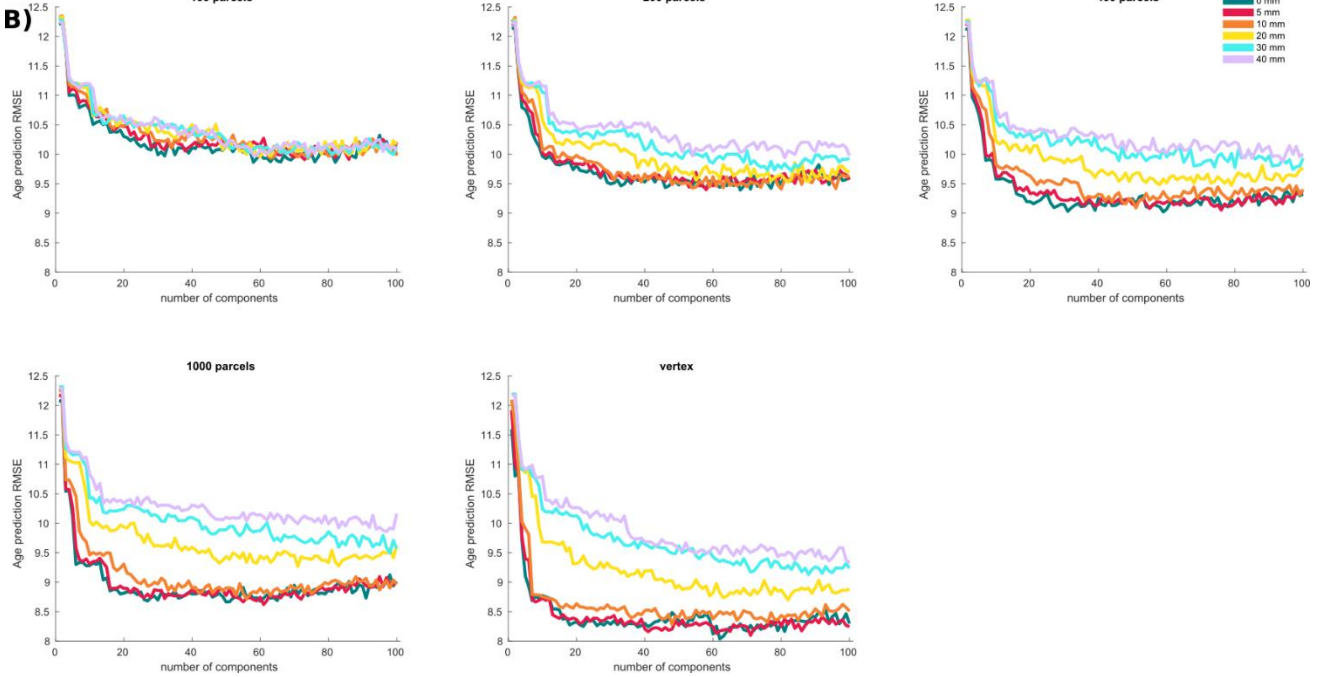

**Supplementary Figure 8.** Root mean square error (RMSE) for Age prediction using linear regression model with lasso regularization ( $\lambda = 0.1$ ) as a function of number of principal components included as features in the predictive model. **A)** results grouped together based on the smoothing level. **B)** results grouped together based on the parcellation resolution.



**Supplementary Table 1.** Root mean square error (RMSE) for Age prediction using linear regression model and PCA-based cortical thickness features. Each column includes a smoothing-parcellation pair condition and each row includes the number of PCs used as predictors in the model.

**Supplementary Table 2.** Root mean square error (RMSE) for Age prediction using support vector machine regression model with linear kernel and PCA-based cortical thickness features. Each column includes a smoothing-parcellation pair condition and each row includes the number of PCs used as predictors in the model.

**Supplementary Table 3.** Root mean square error (RMSE) for Age prediction using linear regression model with ridge regularization (each  $\lambda$  in a separate sheet) using PCA-based cortical thickness features. Each column includes a smoothing-parcellation pair condition and each row includes the number of PCs used as predictors in the model.

**Supplementary Table 4.** Root mean square error (RMSE) for Age prediction using linear regression model with lasso regularization (each  $\lambda$  in a separate sheet) using PCA-based cortical thickness features. Each column includes a smoothing-parcellation pair condition and each row includes the number of PCs used as predictors in the model.

**Supplementary Table 5.** PCA projection for the first 100 PC components of cortical thickness mapped in the subject space used as features in the model across conditions.

**Supplementary Table 6.** PCA projection for the first 100 PC components of cortical thickness mapped on the Schaefer brain parcellation and CIVET surface.
