# Supplementary material for: Association vs. Prediction: The Impact of Cortical Surface Smoothing and Parcellation on Brain Age
Source: Front Big Data. 2021 May 4;4:637724. doi: 10.3389/fdata.2021.637724 (PMC8131952; doi:10.3389/fdata.2021.637724)
Supplement: Supplementary file 3 [file Table_1.XLSX]

## Sheet: Sheet1
Row	kernel_0mm_parcels_100	kernel_0mm_parcels_200	kernel_0mm_parcels_400	kernel_0mm_parcels_1000	kernel_0mm_vertex	kernel_5mm_parcels_100	kernel_5mm_parcels_200	kernel_5mm_parcels_400	kernel_5mm_parcels_1000	kernel_5mm_vertex	kernel_10mm_parcels_100	kernel_10mm_parcels_200	kernel_10mm_parcels_400	kernel_10mm_parcels_1000	kernel_10mm_vertex	kernel_20mm_parcels_100	kernel_20mm_parcels_200	kernel_20mm_parcels_400	kernel_20mm_parcels_1000	kernel_20mm_vertex	kernel_30mm_parcels_100	kernel_30mm_parcels_200	kernel_30mm_parcels_400	kernel_30mm_parcels_1000	kernel_30mm_vertex	kernel_40mm_parcels_100	kernel_40mm_parcels_200	kernel_40mm_parcels_400	kernel_40mm_parcels_1000	kernel_40mm_vertex
PCA_1-001	12.21	12.1194	12.1187	12.0614	11.6129	12.2938	12.2067	12.2126	12.1731	11.9157	12.336	12.2566	12.2724	12.2579	12.0963	12.3244	12.257	12.2876	12.3133	12.1885	12.2881	12.2346	12.2593	12.3026	12.1846	12.2501	12.202	12.22	12.2758	12.1716
PCA_1-002	12.2187	12.1339	12.0962	12.0488	10.8228	12.3117	12.225	12.2005	12.1735	11.0058	12.3463	12.2775	12.2692	12.2738	11.6219	12.3303	12.2827	12.2881	12.3333	12.1627	12.2882	12.2513	12.2567	12.322	12.1829	12.2466	12.2173	12.2198	12.2902	12.179
PCA_1-003	11.8378	11.3665	10.952	10.5536	10.8367	11.8145	11.4057	11.0447	10.5773	10.8756	11.7883	11.4525	11.1726	10.7452	10.9128	11.792	11.527	11.3704	11.1061	11.3292	11.8008	11.572	11.4754	11.2984	11.4387	11.8136	11.6	11.5383	11.4249	11.4994
PCA_1-004	11.0031	10.8118	10.88	10.5477	9.71795	11.0907	10.9359	10.9413	10.5885	9.75375	11.1731	11.0811	11.0599	10.7635	10.0158	11.2606	11.255	11.2343	11.076	10.8607	11.2931	11.3275	11.2884	11.1879	10.9246	11.3109	11.3561	11.2865	11.2156	10.9897
PCA_1-005	11.0125	10.7363	10.6681	10.1244	9.08471	11.0987	10.8626	10.7777	10.274	9.39146	11.1786	10.9921	10.9633	10.6247	9.91549	11.2389	11.1406	11.2025	11.0689	10.8599	11.2153	11.197	11.2215	11.1558	10.9431	11.2154	11.1896	11.2193	11.1773	10.9683
PCA_1-006	11.0091	10.6334	10.3913	9.32939	8.90217	11.0792	10.7426	10.5681	9.57966	9.39697	11.1386	10.906	10.8091	10.4846	9.84916	11.1825	11.1399	11.1369	11.044	10.8353	11.1881	11.2045	11.2382	11.1759	10.9575	11.1763	11.1896	11.2264	11.1936	10.9549
PCA_1-007	10.802	10.376	9.89243	9.34562	8.72009	10.9064	10.7038	9.99182	9.38698	8.74364	11.0537	10.9247	10.7379	9.87649	8.79625	11.1558	11.1504	11.1605	11.0341	10.4576	11.1694	11.2118	11.2563	11.1835	10.8268	11.1646	11.2049	11.2506	11.2078	10.9672
PCA_1-008	10.8128	10.1865	9.88405	9.31363	8.7407	10.9104	10.3313	9.96455	9.36718	8.70912	11.0073	10.7099	10.2463	9.70831	8.8064	11.1339	11.1318	10.9715	10.8046	10.4251	11.1824	11.1529	11.1198	10.9983	10.7811	11.1727	11.1927	11.2029	11.1167	10.7916
PCA_1-009	10.8384	10.1506	9.9045	9.32783	8.74951	10.9313	10.2839	9.98194	9.38176	8.72343	11.0267	10.5013	10.1781	9.67737	8.81341	11.1542	10.9668	10.656	10.4889	9.96709	11.2017	11.1696	11.0721	10.9527	10.6737	11.1881	11.2021	11.1996	11.1179	10.8133
PCA_1-010	10.7342	9.96545	9.588	9.32646	8.76615	10.7758	10.0041	9.6483	9.32808	8.72847	10.8929	10.1012	9.80246	9.46301	8.73692	11.0306	10.5661	10.2367	10.0137	9.69181	11.2208	11.045	10.5564	10.4432	10.2387	11.1909	11.177	10.8183	10.8241	10.8192
PCA_1-011	10.5462	9.92002	9.59793	9.34733	8.77717	10.7813	9.98638	9.65579	9.34753	8.67929	10.8398	10.104	9.79113	9.47837	8.74695	10.6787	10.4639	10.164	9.96919	9.70178	10.7694	11.0278	10.4993	10.4357	10.1901	11.1064	11.1862	10.6647	10.7433	10.3766
PCA_1-012	10.5363	9.92971	9.6133	9.35403	8.74627	10.6395	9.9988	9.66536	9.36205	8.68415	10.69	10.1008	9.78419	9.48831	8.76153	10.6774	10.3351	10.183	9.98311	9.69551	10.6828	10.5476	10.5065	10.4057	10.1796	10.7678	10.6817	10.6752	10.6189	10.3812
PCA_1-013	10.5541	9.94356	9.6024	9.37213	8.58775	10.6593	10.0159	9.63806	9.35112	8.4554	10.712	10.0966	9.77892	9.4939	8.68918	10.691	10.3029	10.1577	9.95598	9.6873	10.6564	10.5679	10.4652	10.3678	10.1977	10.6946	10.6683	10.6557	10.6311	10.3667
PCA_1-014	10.5645	9.81382	9.54922	9.065	8.54644	10.6737	9.86976	9.61542	9.35904	8.46662	10.7198	9.96205	9.77225	9.46655	8.68576	10.6625	10.2039	10.092	9.92425	9.67272	10.6162	10.4091	10.3193	10.1976	10.2086	10.6313	10.6308	10.4451	10.3584	10.3761
PCA_1-015	10.5653	9.82542	9.55128	9.08268	8.52745	10.6153	9.89289	9.61702	9.24359	8.42069	10.7309	9.98283	9.78066	9.48687	8.62274	10.687	10.2182	10.1022	9.91506	9.68282	10.6306	10.3801	10.3247	10.2216	10.1616	10.6452	10.4992	10.4622	10.3692	10.331
PCA_1-016	10.4016	9.82932	9.28615	8.90346	8.36625	10.4628	9.89704	9.43839	8.91086	8.42808	10.5106	9.99488	9.79371	9.41075	8.57224	10.5843	10.1986	10.114	9.90079	9.69034	10.6422	10.3921	10.3358	10.224	10.1458	10.6594	10.5133	10.4729	10.3912	10.3306
PCA_1-017	10.3829	9.83588	9.29807	8.87888	8.38443	10.4634	9.90778	9.39694	8.91225	8.38203	10.5131	9.97598	9.73233	9.26627	8.58827	10.5999	10.2116	10.1203	9.92677	9.53198	10.6166	10.4062	10.3455	10.2504	10.1557	10.6194	10.5325	10.4928	10.4069	10.3086
PCA_1-018	10.4004	9.84687	9.31108	8.86796	8.33306	10.4782	9.91181	9.37151	8.90423	8.38223	10.5236	9.99879	9.69906	9.26795	8.57283	10.5685	10.2312	10.1305	9.92575	9.54899	10.6165	10.4315	10.3275	10.2588	10.1424	10.6434	10.5063	10.4271	10.3898	10.3256
PCA_1-019	10.4212	9.78244	9.27291	8.83782	8.32103	10.4984	9.90805	9.36124	8.91013	8.38709	10.5222	9.99086	9.67823	9.25882	8.5666	10.5435	10.2478	10.0954	9.94659	9.29252	10.5819	10.3945	10.3547	10.2518	10.145	10.6464	10.4465	10.4137	10.408	10.2132
PCA_1-020	10.3548	9.76912	9.20951	8.84852	8.31122	10.5001	9.8861	9.29877	8.93027	8.40091	10.5367	9.99302	9.56639	9.27599	8.58316	10.5433	10.206	10.1108	9.94301	9.31218	10.5965	10.3487	10.3384	10.2761	10.1624	10.5701	10.4656	10.4262	10.3648	10.2143
PCA_1-021	10.2848	9.77256	9.20619	8.87124	8.29941	10.4698	9.84334	9.32259	8.93143	8.33749	10.55	10.0015	9.56606	9.22325	8.5948	10.5626	10.1901	10.1241	9.95856	9.32802	10.5791	10.3386	10.3198	10.282	10.143	10.5909	10.4529	10.4019	10.3857	10.1897
PCA_1-022	10.2716	9.73016	9.22149	8.84074	8.29939	10.3958	9.80681	9.32708	8.86893	8.33511	10.5401	9.96402	9.49934	9.14676	8.61319	10.5858	10.2094	10.1365	9.96419	9.34117	10.5924	10.3519	10.3217	10.2939	9.9482	10.6	10.4457	10.4159	10.3895	10.1506
PCA_1-023	10.294	9.74198	9.24586	8.85612	8.32176	10.4015	9.82043	9.34077	8.87907	8.35767	10.507	9.92515	9.52169	9.10421	8.59324	10.5951	10.142	10.0277	9.9781	9.35833	10.5221	10.3544	10.3212	10.3092	9.9364	10.542	10.451	10.4234	10.3901	10.1558
PCA_1-024	10.2039	9.72806	9.25631	8.83499	8.29934	10.3112	9.79214	9.35657	8.86135	8.36354	10.5103	9.89147	9.50935	9.06861	8.5753	10.5396	10.163	9.94248	9.77837	9.28818	10.5463	10.3654	10.3431	10.2595	9.95245	10.5616	10.4654	10.4166	10.3932	10.1728
PCA_1-025	10.1962	9.70549	9.27501	8.85605	8.27847	10.2889	9.77874	9.36972	8.78663	8.3772	10.3829	9.87211	9.52977	9.038	8.58485	10.552	10.1684	9.96231	9.77903	9.30081	10.5488	10.393	10.228	10.2344	9.85123	10.5697	10.4782	10.391	10.3967	10.1904
PCA_1-026	10.2045	9.65454	9.2087	8.76881	8.26573	10.3129	9.76298	9.32892	8.80269	8.39717	10.3703	9.87657	9.54691	9.01162	8.59633	10.5077	10.1636	9.96363	9.75025	9.28488	10.556	10.3787	10.2357	10.1985	9.86437	10.5384	10.4922	10.407	10.41	10.2007
PCA_1-027	10.1615	9.61804	9.16925	8.78112	8.29189	10.3109	9.69761	9.311	8.81316	8.41549	10.3942	9.88688	9.52265	9.03609	8.61446	10.4961	10.1784	9.95139	9.76473	9.28313	10.5263	10.3935	10.2416	10.2071	9.73651	10.559	10.5165	10.419	10.433	10.2187
PCA_1-028	10.1286	9.63808	9.17772	8.80045	8.28657	10.2291	9.68368	9.31764	8.82855	8.42232	10.3962	9.75262	9.52807	9.00716	8.60793	10.505	10.1954	9.97046	9.76496	9.27193	10.5388	10.4139	10.2539	10.1873	9.75286	10.5721	10.4818	10.3805	10.4496	10.2437
PCA_1-029	10.152	9.56803	9.18825	8.8046	8.32734	10.1605	9.69382	9.33811	8.83574	8.43767	10.2759	9.77235	9.49371	8.99493	8.59236	10.5252	10.1703	9.98768	9.6018	9.26926	10.5118	10.4063	10.2578	10.1991	9.7573	10.5882	10.4944	10.3973	10.4606	10.0917
PCA_1-030	10.1228	9.5196	9.2044	8.82784	8.31083	10.1815	9.54384	9.23709	8.82147	8.4449	10.2722	9.69689	9.51273	8.99968	8.60452	10.4207	10.1987	9.98478	9.62657	9.26007	10.5312	10.4226	10.2693	10.1852	9.7799	10.5313	10.5197	10.3988	10.3839	10.1081
PCA_1-031	10.1261	9.5042	9.15664	8.82938	8.29543	10.1888	9.56851	9.25853	8.82269	8.45064	10.2278	9.71019	9.52749	9.01107	8.58937	10.3618	10.1979	9.97865	9.64376	9.26291	10.5416	10.4289	10.2651	10.0985	9.79177	10.5233	10.5221	10.4154	10.3538	10.1246
PCA_1-032	10.0855	9.53792	9.16996	8.84148	8.3024	10.1725	9.57806	9.27562	8.82982	8.38245	10.2428	9.73084	9.50411	9.02592	8.56176	10.3686	10.1714	9.97064	9.64409	9.20048	10.5454	10.4112	10.2535	10.1146	9.81148	10.5437	10.5268	10.4202	10.3278	10.1477
PCA_1-033	10.1111	9.53788	9.17947	8.85652	8.32357	10.1579	9.60325	9.2625	8.84577	8.40375	10.2319	9.73007	9.48918	8.92812	8.55572	10.3743	10.1053	9.99838	9.65712	9.16082	10.4668	10.4067	10.2348	10.1236	9.72375	10.5624	10.525	10.4265	10.3091	10.1615
PCA_1-034	10.1196	9.55606	9.19682	8.87053	8.33251	10.1674	9.61494	9.2643	8.80404	8.35664	10.2459	9.75125	9.50953	8.94608	8.55305	10.3815	10.1163	9.99554	9.67081	9.13093	10.4753	10.4367	10.2536	10.1078	9.73824	10.5835	10.5566	10.3778	10.3193	10.1551
PCA_1-035	10.1212	9.57502	9.20693	8.89512	8.34672	10.1741	9.63531	9.20675	8.82487	8.36391	10.265	9.72572	9.34773	8.95721	8.49217	10.3829	10.118	9.93318	9.68539	9.15618	10.4715	10.4585	10.2327	10.0868	9.74485	10.4891	10.5669	10.3966	10.3125	9.86195
PCA_1-036	10.1177	9.58011	9.20712	8.84353	8.33025	10.1649	9.63457	9.21942	8.83528	8.36659	10.2746	9.70584	9.27886	8.98056	8.47667	10.4038	10.0584	9.8083	9.65614	9.16481	10.4777	10.3317	10.2388	10.1084	9.69325	10.4387	10.5264	10.3827	10.3209	9.88222
PCA_1-037	10.1361	9.59	9.18921	8.8434	8.31176	10.174	9.62588	9.20107	8.8492	8.38605	10.273	9.60216	9.26516	8.9854	8.49243	10.4214	10.0702	9.7613	9.58009	9.15988	10.4628	10.3563	10.2497	10.1325	9.71559	10.4584	10.5379	10.401	10.3407	9.82823
PCA_1-038	10.1001	9.60583	9.19683	8.86536	8.33824	10.1648	9.62554	9.2101	8.87364	8.38221	10.2839	9.62043	9.26845	9.0033	8.48993	10.4259	9.88542	9.74907	9.58773	9.16435	10.437	10.3542	10.264	10.1059	9.72725	10.4512	10.5194	10.4309	10.3561	9.84793
PCA_1-039	10.1154	9.61727	9.18664	8.86162	8.29442	10.1966	9.63987	9.21945	8.88815	8.39281	10.3021	9.63959	9.28363	9.02006	8.48465	10.4418	9.89371	9.76155	9.6146	9.18083	10.4444	10.3796	10.2774	10.1402	9.71024	10.4345	10.4961	10.4011	10.3409	9.73268
PCA_1-040	10.1242	9.6414	9.20142	8.88994	8.32605	10.196	9.64449	9.23101	8.90578	8.28937	10.3114	9.65717	9.30643	9.04384	8.5002	10.47	9.88835	9.73592	9.6215	9.181	10.4707	10.229	10.1616	10.1289	9.70086	10.4519	10.5048	10.3969	10.353	9.75411
PCA_1-041	10.1391	9.64786	9.2049	8.88918	8.32188	10.2214	9.66466	9.23549	8.91331	8.29888	10.3405	9.63826	9.2983	8.96634	8.50758	10.4215	9.91602	9.74754	9.60077	9.19281	10.3794	10.2376	10.1444	10.1092	9.70876	10.4615	10.5209	10.3642	10.3568	9.75075
PCA_1-042	10.1641	9.66921	9.2256	8.90822	8.35771	10.2431	9.65938	9.24446	8.88374	8.27376	10.3567	9.6669	9.29864	8.98126	8.50532	10.3978	9.93059	9.76978	9.61104	9.17483	10.3914	10.2646	10.1373	10.1242	9.65937	10.4756	10.4779	10.3447	10.3994	9.76261
PCA_1-043	10.1832	9.68257	9.2328	8.91922	8.38971	10.2649	9.68027	9.25961	8.89514	8.28832	10.3589	9.65379	9.28618	8.97314	8.51921	10.4288	9.89019	9.68453	9.50868	9.11648	10.4039	10.1697	10.1245	10.0077	9.66024	10.4605	10.4946	10.3496	10.3897	9.76247
PCA_1-044	10.1939	9.70138	9.2655	8.9092	8.42195	10.2862	9.65618	9.25161	8.86702	8.31059	10.3732	9.65212	9.28405	8.99245	8.48989	10.4429	9.83684	9.69707	9.52125	9.11431	10.4035	10.2072	10.1094	10.0144	9.67565	10.4851	10.4358	10.3378	10.3364	9.78469
PCA_1-045	10.2229	9.67913	9.27947	8.90253	8.45977	10.287	9.6599	9.2816	8.87741	8.32456	10.393	9.64598	9.30706	9.00644	8.40766	10.4251	9.8535	9.64301	9.53201	9.10704	10.3486	10.0577	10.045	9.96169	9.62828	10.4115	10.3489	10.2204	10.1802	9.76914
PCA_1-046	10.161	9.55147	9.27708	8.91367	8.52931	10.2438	9.60867	9.29606	8.88863	8.33714	10.4263	9.66974	9.3089	8.95093	8.42159	10.4374	9.87181	9.65334	9.53961	9.06161	10.355	10.0764	10.0283	9.94318	9.63997	10.3866	10.2412	10.2386	10.1629	9.70258
PCA_1-047	10.1633	9.57454	9.29574	8.93519	8.53594	10.2563	9.61892	9.26598	8.90089	8.34016	10.3073	9.67412	9.23378	8.97058	8.44114	10.4519	9.8275	9.66698	9.44352	9.07148	10.3726	10.0801	10.0149	9.96142	9.65793	10.3224	10.2389	10.2525	10.1747	9.70164
PCA_1-048	10.1696	9.56991	9.29621	8.87487	8.56952	10.2698	9.63022	9.2802	8.91216	8.3534	10.3166	9.58987	9.26206	8.97417	8.43717	10.2613	9.82726	9.67094	9.44554	9.05964	10.3644	10.0894	10.0048	9.9793	9.61703	10.3237	10.2405	10.2049	10.1701	9.70626
PCA_1-049	10.2051	9.58787	9.31778	8.88794	8.58327	10.2821	9.63986	9.27746	8.93042	8.35669	10.3298	9.57053	9.27477	8.97984	8.46415	10.2845	9.8327	9.69463	9.45519	8.99234	10.3477	10.0794	10.0014	9.98683	9.61726	10.252	10.2363	10.2271	10.1913	9.70207
PCA_1-050	10.217	9.56868	9.31662	8.87677	8.52745	10.2817	9.56201	9.28964	8.84591	8.34334	10.2639	9.57968	9.25274	8.98668	8.47413	10.2494	9.73582	9.69418	9.45652	9.02365	10.3679	10.1047	10.0186	10.0066	9.60806	10.2663	10.2695	10.1124	10.1574	9.69619
PCA_1-051	10.1797	9.602	9.3382	8.87671	8.51318	10.251	9.58444	9.26595	8.85306	8.37188	10.2718	9.5778	9.27812	8.95251	8.47395	10.2542	9.70866	9.70139	9.46612	9.00758	10.2631	10.1177	10.0195	10.0363	9.63934	10.2958	10.2059	10.1365	10.1761	9.70418
PCA_1-052	10.2008	9.61393	9.34192	8.88698	8.52938	10.2696	9.60058	9.29103	8.84362	8.38981	10.2876	9.57065	9.29253	8.95663	8.49272	10.2485	9.72604	9.70848	9.47616	8.91911	10.2094	10.134	10.0197	10.0434	9.64056	10.2956	10.2216	10.1637	10.1832	9.66968
PCA_1-053	10.1852	9.62397	9.34806	8.90166	8.54215	10.2157	9.61287	9.29131	8.84811	8.38714	10.2523	9.60798	9.29428	8.94628	8.46054	10.2012	9.73527	9.5842	9.48573	8.93678	10.2227	10.102	10.0414	10.0613	9.63093	10.2174	10.2355	10.168	10.1876	9.66593
PCA_1-054	10.1894	9.63806	9.31437	8.91989	8.57274	10.2387	9.63377	9.23722	8.87048	8.40954	10.2494	9.59564	9.31001	8.94749	8.48047	10.1808	9.76052	9.60389	9.44262	8.95851	10.1632	10.0625	10.0185	10.0136	9.64626	10.1762	10.1811	10.1813	10.1913	9.64451
PCA_1-055	10.1929	9.6361	9.22674	8.9331	8.59827	10.2542	9.65102	9.26175	8.88278	8.44104	10.2525	9.59794	9.32011	8.94185	8.48978	10.1752	9.76478	9.61181	9.46312	8.95776	10.1716	10.05	10.0311	9.99573	9.60272	10.1831	10.1878	10.1905	10.2122	9.64922
PCA_1-056	10.2126	9.64989	9.22975	8.92051	8.60201	10.2374	9.61922	9.26844	8.84425	8.39392	10.2375	9.62321	9.32745	8.91554	8.51494	10.1225	9.77692	9.63331	9.46546	8.97151	10.1515	10.0833	10.0344	10.0115	9.53483	10.204	10.2117	10.2023	10.2372	9.65937
PCA_1-057	10.1577	9.55623	9.24069	8.92996	8.57054	10.2536	9.5471	9.28228	8.84011	8.38353	10.2647	9.64657	9.3502	8.91685	8.51308	10.1423	9.78414	9.59413	9.45747	8.99255	10.1402	10.0831	10.0419	10.029	9.54347	10.1578	10.1873	10.1413	10.2178	9.66071
PCA_1-058	10.1827	9.57655	9.2494	8.93223	8.58585	10.2076	9.56321	9.28482	8.84596	8.40074	10.284	9.65596	9.37068	8.93717	8.52581	10.1371	9.78424	9.63232	9.4615	8.93285	10.1551	10.0829	10.0439	10.0472	9.54008	10.1505	10.1886	10.1356	10.227	9.67982
PCA_1-059	10.2014	9.59391	9.24693	8.92139	8.47246	10.2309	9.56512	9.29515	8.84287	8.42049	10.2126	9.60016	9.35219	8.95392	8.5397	10.1656	9.79665	9.62854	9.47788	8.86589	10.1719	10.0823	10.0535	10.0559	9.56732	10.1582	10.1845	10.1606	10.2314	9.69762
PCA_1-060	10.1643	9.59511	9.25474	8.91814	8.33665	10.2144	9.56765	9.30409	8.86428	8.40075	10.2367	9.60884	9.34416	8.97798	8.52986	10.1555	9.77333	9.62126	9.49715	8.88903	10.1594	10.1214	10.0477	10.0426	9.55634	10.1728	10.1881	10.1837	10.22	9.68122
PCA_1-061	10.1465	9.60478	9.28532	8.95041	8.34647	10.2354	9.6046	9.3249	8.86854	8.30113	10.1527	9.63284	9.36819	8.97752	8.55289	10.1225	9.78311	9.6321	9.4657	8.89492	10.1931	10.1005	10.0587	10.077	9.54066	10.1839	10.1998	10.1923	10.2354	9.70424
PCA_1-062	10.1093	9.62969	9.29533	8.95851	8.36055	10.1834	9.58173	9.3187	8.89069	8.31471	10.1444	9.59025	9.37099	8.9932	8.53393	10.1521	9.76806	9.65539	9.46435	8.9203	10.2084	10.0919	10.0834	10.0778	9.47741	10.2055	10.2245	10.2004	10.2294	9.68478
PCA_1-063	10.0374	9.6282	9.30498	8.94683	8.39296	10.16	9.60233	9.34545	8.90369	8.32278	10.1623	9.61181	9.4049	9.01049	8.55444	10.1572	9.77445	9.65458	9.49372	8.93453	10.2252	10.1039	10.0454	10.0094	9.49107	10.201	10.1911	10.2172	10.2599	9.64759
PCA_1-064	10.0706	9.64791	9.32331	8.97637	8.40635	10.1469	9.60913	9.36027	8.90767	8.32302	10.1839	9.62736	9.39728	9.00913	8.50712	10.1568	9.80019	9.66025	9.48902	8.94737	10.1559	10.1209	10.0661	9.95795	9.49071	10.2068	10.2119	10.2135	10.2693	9.65272
PCA_1-065	10.0305	9.65362	9.33047	8.98063	8.44648	10.0707	9.62151	9.36315	8.93849	8.34303	10.1842	9.58412	9.41394	9.04695	8.52573	10.1354	9.82965	9.67067	9.50708	8.93786	10.1972	10.097	10.0103	9.92219	9.50348	10.2414	10.2253	10.2076	10.187	9.65923
PCA_1-066	10.0456	9.63664	9.27548	8.98908	8.4627	10.1029	9.63362	9.35922	8.95043	8.36868	10.1789	9.58486	9.44363	9.05191	8.54447	10.1564	9.77974	9.67533	9.49764	8.94341	10.1966	10.1034	10.0342	9.90818	9.48669	10.2425	10.2282	10.2203	10.2034	9.67453
PCA_1-067	10.0532	9.63685	9.29834	9.00396	8.45651	10.1001	9.6317	9.32486	8.97653	8.34723	10.1918	9.6165	9.40835	9.06491	8.56012	10.1787	9.77645	9.66197	9.50205	8.94504	10.1949	10.067	10.0235	9.93444	9.50805	10.2552	10.2372	10.197	10.2122	9.68876
PCA_1-068	10.0633	9.62808	9.3032	9.01608	8.47846	10.1157	9.62263	9.33751	8.9834	8.3728	10.2127	9.60938	9.41792	9.07512	8.58302	10.1803	9.79399	9.68043	9.51058	8.96086	10.2143	10.088	9.98201	9.93977	9.38631	10.257	10.2645	10.2261	10.1821	9.66017
PCA_1-069	10.069	9.64799	9.32876	8.99627	8.49915	10.1017	9.65248	9.3495	8.9528	8.3984	10.2271	9.61779	9.43832	9.09333	8.57164	10.1589	9.80032	9.70836	9.51784	8.9484	10.2385	10.0513	9.97944	9.9284	9.38082	10.2776	10.2586	10.2102	10.2067	9.68697
PCA_1-070	10.0686	9.66105	9.35091	9.00667	8.52056	10.0855	9.63263	9.35257	8.96712	8.37326	10.0904	9.65129	9.44433	9.11951	8.56158	10.1822	9.76436	9.70381	9.53534	8.9305	10.234	10.0439	9.99212	9.96274	9.39721	10.2664	10.2903	10.2372	10.2262	9.67489
PCA_1-071	10.0821	9.66083	9.34774	9.02271	8.52699	10.108	9.63332	9.36186	8.99045	8.33471	10.1291	9.65913	9.45651	9.1257	8.59045	10.1849	9.75796	9.72112	9.43971	8.93652	10.2416	9.98824	10.0119	9.8411	9.41403	10.2645	10.2971	10.2376	10.2461	9.68898
PCA_1-072	10.0887	9.68586	9.36301	9.03793	8.56237	10.1054	9.6529	9.38668	9.00294	8.34347	10.145	9.6521	9.4662	9.09772	8.55337	10.1776	9.76157	9.71898	9.43992	8.95696	10.1712	9.91719	10.0189	9.84732	9.4304	10.2805	10.3106	10.2576	10.2325	9.69025
PCA_1-073	10.0937	9.68923	9.34071	9.05128	8.59244	10.0897	9.67297	9.3304	9.02485	8.37038	10.1599	9.67225	9.47758	9.11987	8.52047	10.1794	9.73272	9.69072	9.48383	8.96076	10.2082	9.9361	10.0504	9.87732	9.45803	10.2275	10.2191	10.2855	10.2244	9.68612
PCA_1-074	10.0665	9.70654	9.32955	9.05167	8.61969	10.0877	9.69212	9.35274	9.00072	8.3883	10.1654	9.68236	9.44538	9.10715	8.53369	10.2107	9.75117	9.67583	9.50775	8.99473	10.2029	9.94696	10.0437	9.89978	9.45648	10.2423	10.2477	10.302	10.2352	9.70053
PCA_1-075	10.0793	9.72699	9.3405	9.07639	8.63088	10.1199	9.714	9.32246	9.00353	8.4037	10.1947	9.66634	9.4763	9.13172	8.50663	10.1852	9.76836	9.69799	9.52611	8.9836	10.2106	9.96055	10.0381	9.896	9.49686	10.2532	10.2592	10.3115	10.1823	9.7159
PCA_1-076	10.1022	9.73184	9.29599	9.05137	8.63077	10.1165	9.72906	9.33826	9.00214	8.40347	10.1876	9.67468	9.44291	9.14913	8.49531	10.2125	9.7745	9.67163	9.51851	8.99074	10.2146	9.95617	10.0394	9.9041	9.50151	10.2483	10.2408	10.3246	10.2026	9.69777
PCA_1-077	10.1025	9.76069	9.31233	9.09117	8.66117	10.113	9.74975	9.34363	9.03329	8.43325	10.2085	9.67706	9.45226	9.15259	8.51809	10.2155	9.7643	9.68636	9.53577	8.94218	10.2372	9.9646	10.0301	9.92779	9.4394	10.2775	10.2109	10.3275	10.2046	9.71837
PCA_1-078	10.1298	9.79109	9.31329	9.07439	8.69688	10.1308	9.75852	9.32752	9.05712	8.44584	10.2021	9.69409	9.463	9.15754	8.51514	10.2163	9.7433	9.6869	9.52879	8.96402	10.2672	9.95105	10.0211	9.91519	9.45948	10.2899	10.2045	10.3111	10.2179	9.67449
PCA_1-079	10.1449	9.79315	9.34168	9.09565	8.69976	10.1537	9.78624	9.35044	9.08944	8.45799	10.2127	9.69191	9.46931	9.17384	8.51514	10.2375	9.72952	9.7255	9.5173	8.94592	10.2043	9.97467	10.0379	9.87717	9.45973	10.2991	10.1992	10.2704	10.1912	9.62288
PCA_1-080	10.1251	9.82142	9.34475	9.11407	8.73346	10.1563	9.78078	9.34923	9.07425	8.48091	10.2507	9.72086	9.46352	9.18675	8.51226	10.2325	9.75644	9.73844	9.52931	8.96416	10.1944	9.98498	10.0669	9.8916	9.45091	10.2871	10.2231	10.2538	10.2074	9.5796
PCA_1-081	10.1568	9.8199	9.36307	9.12463	8.72002	10.1573	9.81352	9.36059	9.08968	8.47852	10.2571	9.7258	9.47823	9.19496	8.53833	10.2512	9.76268	9.7575	9.52551	8.96796	10.2313	9.98275	10.0851	9.88712	9.46093	10.2644	10.2052	10.2582	10.2087	9.597
PCA_1-082	10.1565	9.84255	9.36358	9.1344	8.75766	10.1643	9.81354	9.37444	9.07861	8.51261	10.2421	9.71504	9.48672	9.18324	8.5411	10.2738	9.78381	9.75592	9.50934	8.97359	10.2242	9.99383	10.0355	9.93168	9.45552	10.3003	10.188	10.2824	10.2367	9.60992
PCA_1-083	10.1948	9.82408	9.36694	9.14483	8.78299	10.192	9.81598	9.39431	9.12087	8.53353	10.2555	9.7472	9.49849	9.18195	8.5588	10.2924	9.79507	9.76993	9.52804	8.9913	10.2253	9.98701	10.0513	9.94994	9.4661	10.2962	10.2084	10.2134	10.1626	9.6096
PCA_1-084	10.1759	9.86891	9.38366	9.14536	8.79773	10.1949	9.80186	9.39387	9.13982	8.53096	10.2664	9.75521	9.52179	9.21065	8.57271	10.3133	9.8201	9.77464	9.54591	9.00184	10.2642	10.0103	10.079	9.90565	9.44557	10.2761	10.2181	10.2392	10.1797	9.58464
PCA_1-085	10.1953	9.81855	9.38453	9.17728	8.83902	10.2053	9.81961	9.40357	9.15202	8.53705	10.2546	9.77114	9.53808	9.23081	8.58788	10.323	9.848	9.78888	9.55669	9.01246	10.2651	9.99016	10.0671	9.92762	9.42006	10.2881	10.2092	10.2582	10.2061	9.58264
PCA_1-086	10.2188	9.81885	9.4216	9.18352	8.86987	10.2231	9.83251	9.42416	9.16944	8.52207	10.2605	9.79675	9.53081	9.24747	8.61125	10.3079	9.84123	9.79929	9.58712	9.02956	10.28	10.0324	10.0674	9.91556	9.45116	10.3132	10.2264	10.2441	10.2275	9.58669
PCA_1-087	10.222	9.83461	9.44413	9.16127	8.9084	10.2404	9.80137	9.44593	9.17726	8.55216	10.2696	9.74959	9.56068	9.24674	8.6357	10.3288	9.75004	9.82138	9.60804	9.04968	10.3097	10.0385	10.1006	9.94107	9.44012	10.3159	10.2479	10.2702	10.2304	9.59097
PCA_1-088	10.2439	9.84851	9.45646	9.14864	8.94618	10.2637	9.7945	9.47662	9.17743	8.56157	10.2845	9.76685	9.57998	9.27367	8.65478	10.3168	9.7785	9.85641	9.62262	9.05087	10.3265	10.0463	10.0865	9.9549	9.37189	10.3385	10.2833	10.2592	10.2641	9.62581
PCA_1-089	10.2706	9.86224	9.47642	9.1586	8.95392	10.2823	9.82669	9.49215	9.16481	8.57068	10.2934	9.75417	9.60557	9.27042	8.67369	10.3015	9.78346	9.86288	9.62732	9.07854	10.2959	10.0699	10.0713	9.98264	9.40488	10.3456	10.2916	10.2578	10.266	9.63738
PCA_1-090	10.2715	9.89316	9.48511	9.16104	9.01363	10.2837	9.83231	9.50173	9.16057	8.60465	10.3374	9.716	9.61534	9.20716	8.6753	10.3183	9.8111	9.87655	9.61556	9.08302	10.3272	10.0938	10.0836	10.0044	9.4186	10.3471	10.3049	10.2069	10.2697	9.60454
PCA_1-091	10.3091	9.89993	9.48121	9.17686	9.07035	10.3325	9.79098	9.45922	9.17194	8.61996	10.3633	9.74368	9.54034	9.23765	8.70684	10.2948	9.84152	9.88396	9.66936	9.11694	10.3407	10.0659	9.95933	10.0097	9.42002	10.3559	10.3374	10.1735	10.2758	9.64223
PCA_1-092	10.3187	9.90476	9.4766	9.15875	9.08254	10.3362	9.81749	9.45878	9.18312	8.61071	10.3472	9.75258	9.55041	9.252	8.70703	10.2856	9.86312	9.85037	9.67592	9.1232	10.2931	10.0895	9.97298	10.0321	9.43378	10.3915	10.3061	10.1956	10.2771	9.57516
PCA_1-093	10.3634	9.84589	9.47221	9.19838	9.09925	10.3184	9.76581	9.45859	9.21662	8.61161	10.3487	9.76585	9.57803	9.27152	8.71845	10.3043	9.84041	9.86135	9.67343	9.06484	10.3042	10.095	9.98516	9.97537	9.43421	10.3943	10.3256	10.1924	10.1669	9.57333
PCA_1-094	10.3427	9.86475	9.50835	9.17857	9.10817	10.3498	9.78709	9.47793	9.20007	8.64375	10.3828	9.74343	9.59387	9.25526	8.7365	10.3221	9.85901	9.87245	9.68926	9.08342	10.306	10.0902	9.99496	10.0013	9.42761	10.3944	10.3358	10.1183	10.1083	9.59892
PCA_1-095	10.3559	9.8793	9.51696	9.15463	9.08006	10.3682	9.83059	9.49128	9.21204	8.63656	10.3632	9.78216	9.60674	9.27361	8.734	10.3164	9.88329	9.90159	9.70388	9.11762	10.3005	10.1114	9.96765	10.0035	9.44265	10.4127	10.3362	10.1269	10.1086	9.59443
PCA_1-096	10.3694	9.88592	9.54538	9.18259	9.02548	10.3896	9.82611	9.51011	9.22372	8.65571	10.3591	9.77499	9.62938	9.29057	8.72365	10.2974	9.91757	9.89497	9.71973	9.10894	10.3155	10.043	9.9898	9.96558	9.45235	10.3643	10.332	10.1778	10.1259	9.59388
PCA_1-097	10.3841	9.88345	9.51719	9.18498	9.07097	10.3975	9.85571	9.52796	9.23836	8.654	10.3892	9.79386	9.58059	9.24298	8.71426	10.3246	9.92441	9.86712	9.75987	9.16324	10.3063	10.0523	9.99189	9.95188	9.45517	10.3897	10.3373	10.197	10.1369	9.61784
PCA_1-098	10.3925	9.87464	9.56092	9.202	9.08682	10.4053	9.86254	9.55179	9.25233	8.68692	10.4089	9.82223	9.53673	9.24774	8.73359	10.2573	9.88894	9.91435	9.74161	9.15093	10.2967	10.0264	10.0267	9.89748	9.46701	10.3741	10.2098	10.2017	10.1324	9.58359
PCA_1-099	10.321	9.90421	9.54476	9.213	9.16416	10.3383	9.86473	9.55791	9.2649	8.68257	10.3464	9.8291	9.54031	9.24896	8.75001	10.2984	9.88277	9.91164	9.75241	9.1715	10.3165	10.0349	10.037	9.90893	9.47876	10.4093	10.229	10.2322	10.1656	9.53208
PCA_1-100	10.3468	9.91948	9.54865	9.2386	9.08494	10.3595	9.88544	9.57461	9.27606	8.69957	10.3495	9.83435	9.54327	9.26749	8.76082	10.2841	9.91066	9.90206	9.77892	9.17711	10.3403	10.0436	10.0607	9.90268	9.50226	10.4257	10.2729	10.2366	10.1719	9.52247
