# Supplementary material for: Association vs. Prediction: The Impact of Cortical Surface Smoothing and Parcellation on Brain Age
Source: Front Big Data. 2021 May 4;4:637724. doi: 10.3389/fdata.2021.637724 (PMC8131952; doi:10.3389/fdata.2021.637724)
Supplement: Supplementary file 4 [file Table_2.XLSX]

## Sheet: Sheet1
Row	kernel_0mm_parcels_100	kernel_0mm_parcels_200	kernel_0mm_parcels_400	kernel_0mm_parcels_1000	kernel_0mm_vertex	kernel_5mm_parcels_100	kernel_5mm_parcels_200	kernel_5mm_parcels_400	kernel_5mm_parcels_1000	kernel_5mm_vertex	kernel_10mm_parcels_100	kernel_10mm_parcels_200	kernel_10mm_parcels_400	kernel_10mm_parcels_1000	kernel_10mm_vertex	kernel_20mm_parcels_100	kernel_20mm_parcels_200	kernel_20mm_parcels_400	kernel_20mm_parcels_1000	kernel_20mm_vertex	kernel_30mm_parcels_100	kernel_30mm_parcels_200	kernel_30mm_parcels_400	kernel_30mm_parcels_1000	kernel_30mm_vertex	kernel_40mm_parcels_100	kernel_40mm_parcels_200	kernel_40mm_parcels_400	kernel_40mm_parcels_1000	kernel_40mm_vertex
PCA_1-001	12.2223	12.1269	12.1232	12.057	11.6298	12.2871	12.2193	12.2637	12.1768	11.9119	12.3588	12.2762	12.3024	12.2696	12.1177	12.3475	12.2701	12.3125	12.3134	12.2043	12.2898	12.2665	12.2771	12.3295	12.2175	12.2527	12.2062	12.265	12.2639	12.1975
PCA_1-002	12.2083	12.1879	12.1566	12.0776	10.8376	12.3483	12.2864	12.1961	12.2294	11.0677	12.326	12.2811	12.2692	12.2951	11.634	12.3422	12.2812	12.2907	12.3602	12.1861	12.2939	12.2644	12.2674	12.3371	12.2159	12.2559	12.2373	12.2145	12.2872	12.1534
PCA_1-003	11.8537	11.3617	11.0824	10.5898	10.8603	11.8914	11.4131	11.0895	10.5788	10.8981	11.7865	11.4805	11.192	10.7474	10.934	11.8574	11.5428	11.4178	11.1415	11.3718	11.9	11.5866	11.4988	11.3099	11.448	11.8247	11.6283	11.5522	11.4745	11.5017
PCA_1-004	10.9825	10.8047	10.9216	10.5481	9.73875	11.1099	10.9924	10.9606	10.5706	9.75412	11.1729	11.0962	11.0584	10.8319	10.009	11.2401	11.268	11.2747	11.1347	10.8415	11.284	11.3874	11.2643	11.1982	10.9206	11.3259	11.4169	11.335	11.2048	11.0102
PCA_1-005	11.0122	10.791	10.6848	10.1338	9.10169	11.1009	10.8731	10.7967	10.2792	9.39799	11.1889	11.1197	10.9925	10.6748	9.91403	11.2081	11.1633	11.264	11.1347	10.9044	11.2107	11.2263	11.2411	11.1459	10.9414	11.2368	11.2147	11.2242	11.2254	10.9664
PCA_1-006	11.0515	10.5978	10.3815	9.36451	8.95169	11.1071	10.7576	10.5819	9.62489	9.39609	11.1455	10.9174	10.8574	10.5243	9.92748	11.1723	11.222	11.1457	11.0738	10.9015	11.2682	11.2551	11.2729	11.2492	10.9849	11.1686	11.1996	11.2954	11.2587	10.9927
PCA_1-007	10.7857	10.4209	9.95126	9.36259	8.77448	10.9406	10.704	10.0385	9.39558	8.70702	11.1249	10.9611	10.762	9.90775	8.7933	11.1584	11.1964	11.1947	11.0773	10.4715	11.1993	11.2861	11.3291	11.2552	10.8584	11.1418	11.2374	11.2664	11.2131	10.9972
PCA_1-008	10.8711	10.2039	9.94072	9.30598	8.79365	11.0087	10.4053	9.94879	9.34151	8.7174	11.0694	10.7477	10.2921	9.76716	8.80295	11.1802	11.1281	11.0119	10.8246	10.4695	11.2255	11.1998	11.1507	11.0132	10.7862	11.2397	11.2791	11.2471	11.1422	10.8189
PCA_1-009	10.886	10.2064	9.94044	9.35671	8.80704	11	10.3291	10.0114	9.36773	8.75562	11.0483	10.4765	10.1954	9.73486	8.81225	11.2511	11.058	10.6061	10.508	9.93928	11.1913	11.2286	11.1788	11.0548	10.6681	11.3179	11.2941	11.2996	11.2313	10.9186
PCA_1-010	10.8097	9.97733	9.68446	9.32807	8.75424	10.7381	10.0354	9.73335	9.30544	8.71438	10.9973	10.1234	9.88434	9.49448	8.76816	11.0024	10.6222	10.3154	10.0497	9.76703	11.3702	11.1261	10.6021	10.55	10.3056	11.1883	11.2496	10.7613	10.8097	10.9714
PCA_1-011	10.5613	9.94172	9.67924	9.40316	8.86218	10.8832	10.0046	9.74906	9.39725	8.73234	10.8971	10.1889	9.79019	9.56919	8.71707	10.6894	10.5646	10.1457	9.95782	9.74392	10.791	11.0407	10.5382	10.5936	10.2449	11.0985	11.3377	10.6516	10.7743	10.3715
PCA_1-012	10.5579	9.97403	9.69081	9.39195	8.78696	10.6781	10.0446	9.69378	9.3648	8.75139	10.7529	10.1527	9.82963	9.54725	8.81143	10.8083	10.4172	10.2056	10.0319	9.76467	10.7372	10.7032	10.5197	10.4363	10.2351	10.7933	10.7572	10.6583	10.6287	10.4886
PCA_1-013	10.5669	10.0065	9.62612	9.40165	8.65856	10.6935	9.99829	9.63186	9.47963	8.49232	10.7341	10.101	9.82203	9.58316	8.68918	10.6927	10.3824	10.2457	9.97906	9.75323	10.6699	10.592	10.5665	10.3759	10.3027	10.8094	10.7008	10.6317	10.7188	10.3631
PCA_1-014	10.6524	9.85665	9.62007	9.13507	8.57213	10.7313	10.0073	9.69106	9.38206	8.4769	10.8408	10.0715	9.80855	9.60257	8.69137	10.7134	10.2956	10.1194	9.93954	9.70574	10.7313	10.3914	10.3002	10.2792	10.2906	10.6039	10.6815	10.5513	10.462	10.3577
PCA_1-015	10.6761	9.89703	9.63705	9.11042	8.51059	10.6268	9.92993	9.72032	9.31532	8.43892	10.8303	10.0473	9.7716	9.55892	8.68424	10.7724	10.3572	10.2513	10.0206	9.76307	10.6139	10.4081	10.3513	10.2973	10.279	10.6723	10.5398	10.4843	10.4356	10.3308
PCA_1-016	10.4365	9.82824	9.35098	8.9831	8.45044	10.5533	9.95646	9.42683	8.87611	8.54667	10.5729	10.1193	9.90503	9.49771	8.58016	10.6546	10.3179	10.2075	10.0023	9.76988	10.643	10.4364	10.3911	10.3134	10.213	10.683	10.5652	10.5847	10.4412	10.3904
PCA_1-017	10.4143	9.89625	9.41238	8.91425	8.4775	10.4348	10.0131	9.45927	8.948	8.3446	10.5471	10.0577	9.80444	9.27478	8.63829	10.6546	10.3859	10.2846	9.92036	9.59846	10.666	10.4597	10.4602	10.3449	10.2539	10.67	10.5802	10.6016	10.5395	10.4032
PCA_1-018	10.4076	9.99859	9.43739	8.84453	8.36552	10.5152	10.0519	9.54393	9.0282	8.39257	10.5321	10.0721	9.67558	9.2581	8.53069	10.5634	10.3558	10.1415	9.99098	9.64419	10.7949	10.4854	10.4698	10.3815	10.151	10.5903	10.53	10.4562	10.4116	10.4014
PCA_1-019	10.5264	9.86007	9.35631	8.88431	8.36161	10.6127	10.0253	9.50728	8.98332	8.48617	10.4624	10.0794	9.80483	9.29966	8.56447	10.5449	10.4168	10.0936	9.89952	9.35517	10.6041	10.4361	10.4601	10.3271	10.203	10.6423	10.4205	10.4719	10.4347	10.2537
PCA_1-020	10.5309	9.9232	9.21915	8.85107	8.2241	10.6613	9.94021	9.2922	9.0105	8.4138	10.5263	10.0761	9.56845	9.33934	8.62729	10.5779	10.1996	10.0857	9.9826	9.33697	10.6127	10.4573	10.3143	10.324	10.4065	10.655	10.6777	10.4251	10.4369	10.361
PCA_1-021	10.3175	9.89769	9.23233	8.8638	8.23848	10.4335	9.87302	9.36118	9.02428	8.38662	10.4335	10.1656	9.65873	9.21711	8.59818	10.6325	10.2697	10.1287	10.0329	9.37273	10.6433	10.564	10.3819	10.3564	10.1675	10.6343	10.5944	10.4904	10.3561	10.2026
PCA_1-022	10.304	9.78452	9.23032	8.90032	8.32713	10.5089	9.83318	9.40353	8.931	8.3398	10.5736	9.97197	9.57991	9.19396	8.64343	10.6249	10.2763	10.088	10.0418	9.37396	10.645	10.435	10.3341	10.378	9.98768	10.6264	10.5319	10.4518	10.368	10.1534
PCA_1-023	10.3642	9.79155	9.27785	8.9251	8.32419	10.5145	9.92471	9.32575	8.94037	8.36584	10.5316	9.94321	9.6284	9.11966	8.59049	10.7109	10.1961	10.0459	10.0947	9.42699	10.476	10.3841	10.4449	10.2707	10.0666	10.4991	10.4966	10.4041	10.4272	10.1904
PCA_1-024	10.2796	9.78326	9.33356	8.92064	8.35914	10.3815	9.92679	9.44396	8.94747	8.36015	10.5813	9.93803	9.63894	9.15023	8.60514	10.5072	10.2661	10.0164	9.81046	9.29724	10.5751	10.4135	10.3785	10.3011	10.0355	10.5709	10.4515	10.4774	10.4259	10.2154
PCA_1-025	10.231	9.75416	9.29615	8.95498	8.39102	10.3263	9.75889	9.38653	8.92059	8.40847	10.4273	9.94226	9.58964	9.13733	8.61418	10.5829	10.2199	10.036	9.89296	9.35587	10.5164	10.4595	10.3695	10.2434	9.93986	10.4793	10.5888	10.5228	10.3716	10.2344
PCA_1-026	10.3006	9.63308	9.27627	8.94279	8.44393	10.3518	9.8317	9.46121	8.97054	8.4067	10.4421	9.99989	9.58069	9.11428	8.64922	10.5171	10.4261	10.0935	9.81504	9.26991	10.6817	10.4614	10.3127	10.3081	10.0056	10.5958	10.6144	10.5537	10.426	10.2123
PCA_1-027	10.1942	9.66623	9.17593	8.92553	8.35454	10.2661	9.58743	9.40693	8.87575	8.4322	10.4867	9.89695	9.54985	9.01083	8.63306	10.5105	10.2259	9.95993	9.91351	9.26594	10.6075	10.4597	10.2671	10.3159	9.92967	10.5934	10.5801	10.4734	10.4151	10.1779
PCA_1-028	10.3089	9.723	9.31583	8.89827	8.29723	10.4032	9.80923	9.41867	8.83496	8.46847	10.4582	9.72572	9.64739	8.96414	8.65074	10.5032	10.3229	10.227	9.84465	9.35993	10.5481	10.5978	10.3342	10.3108	9.92516	10.5722	10.5813	10.4088	10.5757	10.2842
PCA_1-029	10.2444	9.55657	9.23875	8.91593	8.43766	10.219	9.75362	9.45723	9.00599	8.56804	10.2556	9.75916	9.55524	8.96755	8.67067	10.5071	10.2124	10.0023	9.68454	9.3282	10.5295	10.5116	10.3227	10.3012	9.87006	10.545	10.5583	10.3936	10.3854	10.184
PCA_1-030	10.2319	9.59501	9.26994	8.9949	8.3689	10.2253	9.56043	9.41258	8.94208	8.47081	10.2628	9.71672	9.5928	9.02212	8.71661	10.5087	10.2883	10.0793	9.63731	9.43583	10.5537	10.4667	10.3889	10.3567	9.84059	10.6656	10.6145	10.5067	10.4525	10.1929
PCA_1-031	10.1973	9.62301	9.29384	9.04365	8.26302	10.231	9.5742	9.31781	8.87764	8.61388	10.3131	9.68132	9.6687	9.08191	8.6457	10.4793	10.3077	10.0249	9.85416	9.34591	10.553	10.5154	10.496	10.0681	9.96412	10.6017	10.7239	10.5188	10.366	10.2508
PCA_1-032	10.0942	9.58934	9.17012	8.9861	8.35595	10.2923	9.71	9.33835	8.97282	8.43109	10.3721	9.79128	9.62491	9.09092	8.72603	10.5705	10.2984	10.1345	9.83375	9.26263	10.6364	10.5328	10.3827	10.2069	9.97293	10.5448	10.578	10.5171	10.4097	10.2538
PCA_1-033	10.1765	9.76965	9.24293	8.94461	8.47284	10.3521	9.6837	9.49098	8.97035	8.48508	10.3054	9.82236	9.70104	9.01463	8.6009	10.4393	10.1382	10.1029	9.73178	9.27438	10.5237	10.6222	10.388	10.1446	9.91806	10.7141	10.6751	10.564	10.2865	10.2588
PCA_1-034	10.1926	9.68498	9.28845	9.07071	8.49282	10.2807	9.68693	9.48771	8.94432	8.42043	10.3634	9.86667	9.57118	8.93104	8.53371	10.4587	10.2702	10.013	9.80933	9.19914	10.6353	10.5462	10.4569	10.1265	9.99103	10.6129	10.7414	10.5612	10.3526	10.2263
PCA_1-035	10.2157	9.76502	9.22326	9.0191	8.63883	10.1603	9.75326	9.20405	9.02655	8.51387	10.3689	9.82502	9.4976	8.93019	8.49025	10.4541	10.2464	10.0843	9.85078	9.20267	10.5968	10.7371	10.2693	10.2335	9.87464	10.6194	10.8445	10.5663	10.3788	9.95763
PCA_1-036	10.0726	9.66257	9.20083	8.97176	8.47539	10.3659	9.85461	9.42328	8.97457	8.50515	10.4832	9.81056	9.31016	8.98147	8.43643	10.4782	10.1657	9.91573	9.61565	9.28801	10.5914	10.6042	10.3163	10.1371	9.82653	10.4119	10.7357	10.4135	10.341	9.91687
PCA_1-037	10.1642	9.86273	9.20928	8.94785	8.42286	10.3575	9.75487	9.2571	8.98359	8.48892	10.4456	9.76167	9.35841	9.05853	8.60474	10.6731	10.291	9.964	9.71926	9.3067	10.4634	10.5434	10.4626	10.256	9.75787	10.6211	10.7181	10.4241	10.3767	9.85468
PCA_1-038	10.1615	9.73007	9.41115	8.99653	8.48422	10.332	9.79739	9.41385	9.00038	8.40712	10.6164	9.76674	9.48684	9.08868	8.68346	10.5982	10.0769	9.9839	9.71144	9.21535	10.645	10.4632	10.3293	10.182	9.83781	10.4731	10.725	10.5254	10.5079	9.89817
PCA_1-039	10.2691	9.73547	9.32827	9.00433	8.49438	10.3258	9.71999	9.4807	9.03352	8.56574	10.3862	9.7296	9.32166	9.0192	8.39683	10.5458	9.99039	9.90794	9.69671	9.23301	10.5745	10.4825	10.3879	10.1978	9.78017	10.4492	10.5853	10.3916	10.4062	9.75716
PCA_1-040	10.0926	9.7227	9.2361	9.02402	8.407	10.3297	9.71469	9.43866	9.02885	8.45279	10.6258	9.72279	9.37366	9.10373	8.62087	10.6572	9.9668	9.9526	9.66786	9.26517	10.4957	10.3345	10.1647	10.2833	9.77948	10.6006	10.5576	10.3927	10.368	9.70613
PCA_1-041	10.2933	9.63487	9.31972	8.97768	8.49428	10.4203	9.73144	9.32391	9.08389	8.46105	10.5479	9.75102	9.33442	9.02434	8.58571	10.6265	10.1986	9.81195	9.64828	9.35581	10.5134	10.3135	10.0796	10.2476	9.80739	10.5658	10.6878	10.4487	10.3285	9.81699
PCA_1-042	10.3016	9.7842	9.37963	9.07112	8.60493	10.2056	9.80001	9.35216	9.08718	8.43046	10.5085	9.92864	9.3844	9.02289	8.55948	10.4596	9.91718	9.91152	9.7417	9.25724	10.4977	10.4062	10.1161	10.2435	9.60397	10.6651	10.5311	10.5039	10.4159	9.85517
PCA_1-043	10.3486	9.59062	9.14513	9.10716	8.70104	10.3486	9.82721	9.48384	9.1914	8.50914	10.3805	9.76972	9.36944	9.13454	8.60836	10.534	10.0472	9.93153	9.56121	9.14301	10.618	10.3223	10.1787	10.1294	9.66925	10.6644	10.5448	10.4157	10.4478	9.90077
PCA_1-044	10.3003	9.71847	9.24362	9.01465	8.6433	10.478	9.91611	9.39254	8.99582	8.42316	10.2889	9.63436	9.34072	9.08264	8.60429	10.4096	9.96667	9.98262	9.70717	9.14684	10.5807	10.3661	10.1465	10.1839	9.64258	10.706	10.4801	10.5848	10.3569	9.7274
PCA_1-045	10.3786	9.90004	9.36968	8.99345	8.52438	10.4451	9.85913	9.37132	8.94752	8.34554	10.5932	9.53095	9.44841	9.19481	8.55299	10.443	10.0052	9.91217	9.68263	9.23242	10.3418	10.1719	10.1458	10.1691	9.71074	10.4577	10.5839	10.2767	10.246	9.73292
PCA_1-046	10.2742	9.64089	9.44697	9.023	8.80073	10.5064	9.75837	9.43155	9.00946	8.45056	10.4827	9.63264	9.39745	9.08407	8.61052	10.4106	10.0569	9.81664	9.68135	9.1406	10.4649	10.2942	10.0522	10.2049	9.74374	10.5077	10.4486	10.2849	10.1922	9.81654
PCA_1-047	10.3065	9.68797	9.42762	9.17114	8.95605	10.2391	9.70682	9.54309	9.00596	8.41184	10.5543	9.72894	9.47002	9.04948	8.63875	10.4227	10.1259	9.85239	9.4784	9.2527	10.5332	10.3416	10.1853	10.2348	9.81038	10.4341	10.3669	10.2566	10.3312	9.87225
PCA_1-048	10.2469	9.68546	9.43886	9.15114	9.12276	10.5142	9.70226	9.51182	8.96271	8.52877	10.441	9.65587	9.41972	9.00927	8.62207	10.3407	10.0114	9.95381	9.50097	9.0978	10.5764	10.3499	10.2864	10.2261	9.62589	10.5016	10.3038	10.4075	10.1647	9.90019
PCA_1-049	10.3674	9.68469	9.44385	8.99119	8.69774	10.4446	9.72478	9.50334	9.10874	8.51376	10.495	9.6711	9.49427	9.16181	8.55743	10.3805	9.87873	9.84719	9.64743	9.15019	10.3993	10.1867	10.2269	10.1852	9.72969	10.3542	10.2217	10.4303	10.2921	9.70145
PCA_1-050	10.3595	9.70274	9.41793	9.08529	8.59466	10.52	9.61514	9.4351	9.06173	8.56543	10.475	9.5504	9.49505	9.01715	8.54131	10.4284	9.73958	9.79951	9.5389	9.11519	10.4385	10.2313	10.2279	10.2109	9.66955	10.2976	10.4915	10.1336	10.3084	9.72297
PCA_1-051	10.3104	9.68673	9.54789	8.98056	8.77296	10.4928	9.81278	9.53837	8.95669	8.67531	10.6276	9.67129	9.43408	9.00406	8.55953	10.4899	9.87929	9.73501	9.52685	9.05824	10.3252	10.2865	10.1427	10.1178	9.74359	10.4068	10.4755	10.2776	10.4267	9.66547
PCA_1-052	10.435	9.69652	9.50258	9.16722	8.67386	10.4887	9.68105	9.39863	8.89286	8.46941	10.4612	9.64726	9.47934	9.12243	8.53382	10.523	9.90601	10.0104	9.62928	9.11061	10.4255	10.2574	10.2639	10.173	9.69799	10.3682	10.3346	10.2893	10.2092	9.84121
PCA_1-053	10.5325	9.69761	9.54399	9.13695	8.69295	10.3522	9.66337	9.48909	8.91351	8.53114	10.4105	9.76548	9.46894	8.90184	8.67793	10.2562	9.82932	9.76289	9.57888	9.16518	10.3293	10.3226	10.2332	10.1731	9.67316	10.3825	10.3227	10.3271	10.2688	9.6728
PCA_1-054	10.5095	9.8173	9.45427	9.1484	8.74524	10.4315	9.6642	9.56169	8.84466	8.80902	10.4428	9.57693	9.45031	9.08078	8.67977	10.4818	9.76852	9.87088	9.50163	9.201	10.2935	10.1143	10.2253	9.96969	9.62231	10.2632	10.2472	10.209	10.4836	9.74489
PCA_1-055	10.3625	9.68827	9.34505	9.02561	8.76	10.3789	9.78308	9.37111	8.99381	8.69667	10.466	9.82625	9.49595	8.99494	8.73362	10.3051	9.7622	9.8195	9.63527	9.31026	10.3097	10.2707	10.0999	10.0882	9.71498	10.4388	10.3672	10.2186	10.4553	9.7017
PCA_1-056	10.3748	9.76568	9.3756	8.95622	8.85637	10.3887	9.69123	9.52982	8.94145	8.65808	10.2784	9.65844	9.49131	8.99472	8.73839	10.3322	9.79624	9.63864	9.52251	9.06222	10.3925	10.3683	10.1451	10.0758	9.56598	10.3405	10.4239	10.5568	10.2584	9.58089
PCA_1-057	10.3558	9.59935	9.63308	9.0242	8.99184	10.5817	9.81661	9.42667	8.94504	8.61716	10.569	9.69573	9.47613	8.95158	8.80602	10.382	9.9379	9.7027	9.63139	9.05419	10.4675	10.4582	10.1798	10.1842	9.71308	10.3637	10.4639	10.4398	10.4825	9.75332
PCA_1-058	10.4974	9.81346	9.38455	9.05248	8.80026	10.3954	9.71303	9.44861	9.02152	8.52763	10.467	9.82738	9.53654	8.90148	8.59836	10.4001	10.0162	9.90261	9.55613	9.10824	10.353	10.1444	10.0909	10.3777	9.64775	10.2575	10.3005	10.4129	10.5145	9.92207
PCA_1-059	10.4955	9.95423	9.42383	8.91588	8.75563	10.5709	9.86744	9.49842	8.91394	8.73671	10.4163	9.80176	9.53535	8.98972	8.84933	10.3257	9.95742	9.73925	9.46499	9.11724	10.3279	10.3866	10.1516	10.2374	9.69247	10.4399	10.4595	10.4422	10.3428	9.61453
PCA_1-060	10.71	9.7554	9.35929	9.06206	8.64181	10.4992	9.57834	9.59756	8.84785	8.72703	10.5595	9.86585	9.52889	8.99079	8.76873	10.3042	9.94493	9.6851	9.45919	9.16136	10.3909	10.3759	10.2225	10.1699	9.7462	10.3304	10.4843	10.507	10.4837	9.8368
PCA_1-061	10.353	9.76027	9.5963	9.06164	8.72947	10.5531	9.67538	9.5431	8.98834	8.31292	10.5263	9.77721	9.57763	9.14501	8.73611	10.3892	9.86651	9.67473	9.68522	9.0975	10.2841	10.4499	10.1498	10.1619	9.80068	10.4468	10.4209	10.3565	10.5132	9.85661
PCA_1-062	10.397	9.66701	9.44672	9.12797	8.48144	10.3315	9.65476	9.57667	8.90512	8.45711	10.5902	9.75978	9.61512	9.06485	8.72743	10.2905	9.95987	9.7121	9.6171	8.93432	10.3827	10.4033	10.307	10.1397	9.66537	10.5645	10.4144	10.5528	10.5205	9.7473
PCA_1-063	10.3358	9.76091	9.65844	9.06009	8.72362	10.467	9.75727	9.49537	9.04591	8.51068	10.425	9.86727	9.69954	9.11135	8.74919	10.4174	10.021	9.91845	9.58646	8.93883	10.2746	10.4034	10.2686	9.9859	9.57569	10.4455	10.4918	10.4033	10.4125	9.61341
PCA_1-064	10.4004	9.94134	9.66537	9.11296	8.6617	10.3307	9.70708	9.54743	9.14468	8.43162	10.3835	9.84663	9.50479	9.04528	8.77857	10.4388	9.93717	9.85501	9.63372	9.03859	10.3054	10.551	10.3393	10.196	9.72846	10.5768	10.6714	10.4167	10.5301	9.70483
PCA_1-065	10.3002	9.81745	9.44431	9.18392	8.73946	10.5063	9.75234	9.45826	9.08275	8.56847	10.4876	9.51975	9.54237	9.18528	8.69795	10.5271	9.94299	10.0056	9.77577	9.10905	10.4452	10.5792	10.2093	10.0249	9.82743	10.564	10.7551	10.5193	10.3621	9.84675
PCA_1-066	10.3164	9.70668	9.43693	9.15625	9.03883	10.4697	9.71702	9.54973	9.22838	8.50922	10.3659	9.62812	9.72073	9.05085	8.71991	10.3458	9.94999	9.93971	9.62965	9.11381	10.3795	10.3283	10.2125	10.0427	9.58928	10.5338	10.6451	10.5603	10.3099	9.70214
PCA_1-067	10.174	9.85504	9.48616	9.10917	8.85765	10.4056	9.83458	9.41133	9.2363	8.5911	10.4049	9.55203	9.56261	9.16731	8.76446	10.4553	9.73922	9.82166	9.73525	9.24083	10.4696	10.1911	10.2825	10.0478	9.5719	10.7173	10.6879	10.3679	10.2774	9.70968
PCA_1-068	10.1887	9.81851	9.59619	8.9984	8.75918	10.4347	9.70586	9.63146	9.14184	8.63218	10.343	9.78572	9.51693	9.11003	8.82922	10.585	9.97264	9.98039	9.50268	8.98045	10.513	10.3337	10.1148	10.0704	9.45344	10.6008	10.5995	10.5651	10.2926	9.72655
PCA_1-069	10.1656	9.77671	9.42113	9.01129	8.85034	10.2679	9.79754	9.58711	8.98415	8.54228	10.3953	9.7602	9.57677	9.19568	8.70301	10.4645	9.85281	9.82017	9.55551	9.15772	10.4663	10.0018	10.1078	10.1504	9.43229	10.504	10.7444	10.5043	10.295	9.97514
PCA_1-070	10.2236	9.86229	9.41305	9.171	8.83254	10.1298	9.74004	9.57733	9.2249	8.64573	10.4177	9.84989	9.65072	9.23804	8.61855	10.5202	9.91889	9.76636	9.69069	8.9854	10.6604	10.3358	10.294	10.1353	9.44187	10.5292	10.5956	10.3527	10.2873	9.68169
PCA_1-071	10.4536	9.78474	9.42995	9.10245	8.81123	10.2159	9.66546	9.62527	8.97536	8.5209	10.3443	9.74305	9.71622	9.2875	8.61538	10.4199	9.67537	9.89266	9.59066	8.96267	10.4798	10.4422	10.313	9.89626	9.62762	10.7929	10.73	10.4855	10.2451	9.84576
PCA_1-072	10.2852	9.79389	9.43603	9.19394	9.04312	10.3687	9.85747	9.68329	9.10104	8.47514	10.4362	9.73478	9.49056	9.25068	8.69312	10.1773	9.9846	9.93652	9.6698	9.0173	10.4208	10.1259	10.3715	10.0185	9.51811	10.6266	10.5317	10.6307	10.3963	9.7725
PCA_1-073	10.2635	9.85107	9.45255	9.31408	8.70986	10.3853	9.77452	9.63152	9.15834	8.44189	10.4007	9.7171	9.8998	9.32554	8.80284	10.217	9.92626	9.92079	9.78741	9.02265	10.4193	10.3213	10.2244	10.0383	9.54948	10.4379	10.6696	10.5933	10.3766	9.85164
PCA_1-074	10.4869	9.70996	9.5743	9.04235	9.05111	10.2795	9.76901	9.50978	9.12162	8.45461	10.34	9.89942	9.81741	9.32122	8.60065	10.3343	9.8611	9.79296	9.52003	9.16027	10.5021	10.2946	10.2019	10.0362	9.6056	10.5567	10.5918	10.3913	10.3493	9.80353
PCA_1-075	10.3541	9.80728	9.36386	9.25026	8.93818	10.4046	9.95714	9.5612	9.18855	8.57729	10.525	9.79859	9.71677	9.15171	8.50424	10.468	9.87387	9.71007	9.75102	9.23469	10.5385	10.3638	10.3535	9.90096	9.65778	10.5968	10.5906	10.4834	10.4058	9.85185
PCA_1-076	10.422	9.82183	9.47421	9.24654	9.20021	10.3719	9.82679	9.48554	9.17806	8.566	10.5958	9.74675	9.57763	9.25557	8.60512	10.3093	10.1141	9.78909	9.65196	9.14927	10.3831	10.3115	10.2879	10.1734	9.70745	10.5263	10.5698	10.606	10.4536	9.98793
PCA_1-077	10.3544	10.0138	9.51573	9.02761	9.02514	10.1891	10.0314	9.62548	9.15959	8.39214	10.5758	9.78639	9.69222	9.2948	8.67351	10.4058	9.90741	9.81405	9.85834	8.98742	10.3169	10.2447	10.2664	10.0992	9.53678	10.4851	10.6256	10.4499	10.3868	9.85352
PCA_1-078	10.2627	9.86155	9.51219	9.12475	9.04729	10.2487	9.94345	9.61303	9.25045	8.60465	10.5318	9.72115	9.71083	9.3169	8.59016	10.4815	9.94994	9.85661	9.7166	8.96839	10.3622	10.3512	10.3002	10.0793	9.726	10.429	10.4493	10.4508	10.3254	10.0226
PCA_1-079	10.3519	10.1659	9.46551	9.36361	9.07048	10.1655	10.0386	9.59855	9.11193	8.59116	10.4755	10.0395	9.69422	9.21165	8.5913	10.4706	9.9669	9.74205	9.61889	9.05377	10.6849	10.3401	10.288	10.2022	9.50986	10.5593	10.6326	10.6486	10.3801	9.71674
PCA_1-080	10.2874	9.93471	9.45648	9.18143	9.19378	10.3839	10.0845	9.56203	9.29722	8.52066	10.7045	9.77474	9.55183	9.13906	8.59723	10.5558	9.88634	9.94102	9.79282	9.07659	10.3554	10.306	10.3492	9.99409	9.64629	10.6447	10.5625	10.5491	10.519	9.89621
PCA_1-081	10.3875	9.83273	9.58339	9.15976	9.04702	10.3751	9.92034	9.54463	9.22675	8.56035	10.2598	9.98549	9.50359	9.22671	8.63366	10.5673	9.94341	9.99489	9.70394	9.17794	10.4661	10.0306	10.3187	10.1752	9.51031	10.5197	10.5183	10.6719	10.3169	9.81693
PCA_1-082	10.4283	9.81436	9.61717	9.46133	9.01609	10.4412	9.97471	9.52838	9.27762	8.85461	10.4258	10.0664	9.5403	9.33174	8.71101	10.5663	10.0484	10.1148	9.76611	9.07992	10.4452	10.1588	10.2339	10.3684	9.53694	10.6077	10.3942	10.4947	10.3968	9.7674
PCA_1-083	10.3181	10.0079	9.74808	9.22256	9.23624	10.505	9.83681	9.53098	9.19459	8.62603	10.4945	10.0024	9.67176	9.38376	8.68831	10.5873	9.92128	10.0702	9.72192	9.13844	10.3933	10.2494	10.432	10.24	9.47453	10.5099	10.4981	10.4787	10.4919	9.75897
PCA_1-084	10.4214	10.3651	9.70593	9.32792	9.40688	10.477	9.82809	9.62979	9.39981	8.6302	10.6033	9.98978	9.48313	9.53941	8.81977	10.4953	9.9485	10.0274	9.79879	9.16034	10.6759	10.2362	10.2376	10.3515	9.61981	10.6033	10.52	10.4539	10.6125	9.7875
PCA_1-085	10.7026	10.179	9.62283	9.29435	9.40116	10.3149	10.0452	9.74816	9.41328	8.8507	10.4764	9.89774	9.73522	9.52227	8.82557	10.7604	9.9423	9.8934	9.94403	9.14611	10.7214	10.1325	10.3504	10.3829	9.80864	10.4986	10.5955	10.6361	10.4591	9.77619
PCA_1-086	10.3635	9.94562	9.80242	9.31111	9.3292	10.2608	10.0819	9.76171	9.48606	8.61399	10.54	10.1001	9.65812	9.6321	8.83177	10.5359	10.132	10.1619	9.94177	9.26125	10.5429	10.3	10.4084	10.3887	9.73457	10.6209	10.6208	10.8875	10.4739	9.74681
PCA_1-087	10.6699	10.0599	9.62422	9.20805	9.65867	10.599	9.82552	9.68461	9.57763	8.65698	10.4929	10.0134	9.52176	9.4162	8.91921	10.6176	9.96256	10.0244	9.98304	9.22295	10.5445	10.4166	10.4167	10.3589	9.66553	10.623	10.4015	10.4914	10.4904	9.85517
PCA_1-088	10.5701	10.0459	9.56831	9.20797	9.37794	10.5952	10.0178	9.8451	9.37437	8.98577	10.565	9.91904	9.58236	9.6627	8.80812	10.2833	9.98121	10.1465	9.78885	9.17495	10.5688	10.2542	10.4582	10.5104	9.52644	10.5063	10.3869	10.7817	10.6296	9.8038
PCA_1-089	10.5045	10.0371	9.76405	9.32761	9.57651	10.5539	9.92286	9.56658	9.53908	8.74987	10.4154	9.8565	9.66587	9.57932	9.03969	10.391	10.0792	10.3183	9.75374	9.4306	10.644	10.3691	10.6483	10.4711	9.66479	10.5338	10.3468	10.4749	10.8015	9.75683
PCA_1-090	10.7255	10.0748	9.74446	9.24236	9.51723	10.4569	10.0063	9.966	9.29135	8.78069	10.6208	9.82955	9.6591	9.40895	8.91352	10.6794	10.011	10.1591	9.82371	9.15627	10.5905	10.27	10.4404	10.5682	9.75884	10.7488	10.4651	10.5343	10.4133	9.6781
PCA_1-091	10.6889	10.1618	9.8362	9.35291	9.48212	10.6197	10.0052	9.82531	9.44597	8.71987	10.8009	10.0066	9.66877	9.40586	8.88623	10.507	10.2165	10.001	9.95828	9.44075	10.8587	10.4699	10.3573	10.3946	9.47879	10.6881	10.8388	10.5327	10.7214	9.7436
PCA_1-092	10.5571	10.0358	9.63251	9.1553	9.48558	10.6597	10.0601	9.61055	9.38247	8.9374	10.5506	9.88682	9.47656	9.54232	8.87681	10.8432	10.1259	10.1589	9.73037	9.38915	10.6679	10.2708	10.5079	10.45	9.5906	10.7346	10.7649	10.3316	10.5814	9.79946
PCA_1-093	10.5539	10.0859	9.59444	9.44148	9.31924	10.6072	10.0241	9.60973	9.58563	8.99602	10.5811	9.94314	9.57637	9.75409	8.97027	10.8893	10.1063	10.166	9.87626	9.17288	10.4643	10.2208	10.485	10.3784	9.70721	10.579	10.5884	10.4852	10.361	9.76314
PCA_1-094	10.4921	10.0577	9.7832	9.149	9.34845	10.4862	9.83614	9.69145	9.38403	8.93408	10.5051	9.98319	9.80233	9.45865	9.14483	10.6891	10.2748	10.1927	9.67745	9.22621	10.6489	10.253	10.4218	10.5241	9.69996	10.6593	10.5162	10.5086	10.7186	9.89449
PCA_1-095	10.7357	9.98825	9.84119	9.43991	9.46379	10.4568	9.84512	9.58065	9.39135	8.99293	10.6943	9.75613	9.64811	9.63746	9.10635	10.5836	10.1742	10.0987	9.98208	9.23496	10.5271	10.2047	10.3517	10.2825	9.60465	10.7057	10.8667	10.3425	10.2999	9.76948
PCA_1-096	10.5943	10.039	9.76591	9.44946	9.45238	10.4283	10.0507	9.79842	9.37815	9.08546	10.5405	9.81491	9.75993	9.82756	8.95038	10.8089	10.0834	10.1301	9.75534	9.3661	10.6618	10.5385	10.4371	10.3723	9.70009	10.6192	10.7342	10.4401	10.716	9.78122
PCA_1-097	10.7225	10.0968	9.86479	9.52414	9.34249	10.7892	9.76292	9.62332	9.54592	8.92436	10.836	9.96656	9.75143	9.47757	9.10055	10.7544	10.2233	10.1776	10.0236	9.25614	10.6659	10.3017	10.3069	10.3828	9.46787	10.6776	10.7627	10.5562	10.5742	9.87542
PCA_1-098	10.792	10.198	9.75445	9.4388	9.35386	10.6133	10.0258	9.64517	9.56954	9.22352	10.6768	9.9924	9.89367	9.72045	9.08283	10.4717	10.0179	10.17	10.0301	9.29764	10.5368	10.219	10.4209	10.0893	9.97035	10.6826	10.6652	10.642	10.7562	9.9117
PCA_1-099	10.6127	10.0489	9.61955	9.42454	9.49128	10.8659	9.99619	9.80349	9.46914	9.08164	10.6533	9.8771	9.76031	9.46189	8.97516	10.4808	10.4156	10.1957	9.91319	9.23625	10.763	10.3194	10.2901	10.4291	9.99047	10.9765	10.6857	10.5995	10.573	9.7739
PCA_1-100	10.6849	10.0937	9.83377	9.43897	9.57339	10.6841	10.0103	9.88123	9.62298	9.16817	10.6868	9.91535	9.85412	9.51613	9.14461	10.5215	10.2581	10.242	9.8297	9.4793	10.6474	10.5259	10.6096	10.2973	9.78417	10.9114	10.7444	10.886	10.4824	9.65495
