# Supplementary material for: Association vs. Prediction: The Impact of Cortical Surface Smoothing and Parcellation on Brain Age
Source: Front Big Data. 2021 May 4;4:637724. doi: 10.3389/fdata.2021.637724 (PMC8131952; doi:10.3389/fdata.2021.637724)
Supplement: Supplementary file 5 [file Table_3.XLSX]

## Sheet: lambda_0.001
Row	kernel_0mm_parcels_100	kernel_0mm_parcels_200	kernel_0mm_parcels_400	kernel_0mm_parcels_1000	kernel_0mm_vertex	kernel_5mm_parcels_100	kernel_5mm_parcels_200	kernel_5mm_parcels_400	kernel_5mm_parcels_1000	kernel_5mm_vertex	kernel_10mm_parcels_100	kernel_10mm_parcels_200	kernel_10mm_parcels_400	kernel_10mm_parcels_1000	kernel_10mm_vertex	kernel_20mm_parcels_100	kernel_20mm_parcels_200	kernel_20mm_parcels_400	kernel_20mm_parcels_1000	kernel_20mm_vertex	kernel_30mm_parcels_100	kernel_30mm_parcels_200	kernel_30mm_parcels_400	kernel_30mm_parcels_1000	kernel_30mm_vertex	kernel_40mm_parcels_100	kernel_40mm_parcels_200	kernel_40mm_parcels_400	kernel_40mm_parcels_1000	kernel_40mm_vertex
PCA_1-001	12.224	12.112	12.116	12.0604	11.6297	12.3041	12.2195	12.2049	12.199	11.9119	12.3384	12.2669	12.2821	12.2361	12.1243	12.3201	12.2515	12.317	12.3165	12.1765	12.2905	12.2174	12.258	12.2999	12.1957	12.2436	12.2237	12.2104	12.2656	12.1565
PCA_1-002	12.237	12.103	12.1046	12.0501	10.8471	12.3045	12.2239	12.2208	12.1683	11.0081	12.3842	12.2534	12.2649	12.2854	11.6057	12.3361	12.2754	12.3088	12.325	12.1467	12.2768	12.225	12.2343	12.3236	12.1781	12.2267	12.2242	12.1951	12.2877	12.1909
PCA_1-003	11.8909	11.3732	10.9427	10.5595	10.8247	11.7977	11.4541	11.0505	10.5775	10.884	11.8238	11.4671	11.1513	10.759	10.9214	11.807	11.518	11.3705	11.0961	11.3251	11.7989	11.5738	11.4587	11.2953	11.4292	11.7804	11.5949	11.5095	11.4341	11.4918
PCA_1-004	11.0091	10.801	10.8609	10.5575	9.71252	11.0962	10.97	10.9253	10.5859	9.75725	11.1522	11.1193	11.0889	10.752	10.0278	11.2517	11.2252	11.2351	11.0586	10.8559	11.2902	11.3403	11.2923	11.1883	10.9448	11.2818	11.3565	11.2817	11.2079	10.9988
PCA_1-005	11.0013	10.7344	10.6524	10.1094	9.06672	11.0485	10.8853	10.7402	10.2831	9.40832	11.18	11.0072	10.9296	10.6347	9.91192	11.2421	11.1764	11.1859	11.0822	10.8564	11.2114	11.212	11.2085	11.1723	10.9552	11.2133	11.1775	11.2643	11.198	10.9341
PCA_1-006	11.0147	10.6029	10.3986	9.34388	8.91693	11.1219	10.7368	10.5704	9.59752	9.3584	11.1826	10.8973	10.8085	10.5044	9.84609	11.1776	11.153	11.1234	11.0331	10.8568	11.161	11.1979	11.2106	11.1771	10.9302	11.1715	11.197	11.2258	11.1936	10.9603
PCA_1-007	10.8262	10.382	9.88227	9.31247	8.73684	10.9381	10.7403	10.057	9.42224	8.77636	11.0619	10.9355	10.714	9.86569	8.79419	11.1689	11.1639	11.1807	11.0177	10.4458	11.1631	11.2486	11.2609	11.1976	10.8297	11.1881	11.1899	11.2168	11.2258	10.9131
PCA_1-008	10.8311	10.1851	9.93539	9.3304	8.72958	10.9396	10.3114	9.96417	9.41049	8.71762	11.0075	10.7175	10.2507	9.74629	8.81742	11.166	11.0993	10.9797	10.7893	10.4665	11.1969	11.1709	11.168	11.0442	10.8	11.1771	11.2147	11.21	11.1326	10.7363
PCA_1-009	10.8261	10.1086	9.89978	9.34164	8.74764	10.8931	10.2639	9.9438	9.42263	8.73459	11.0526	10.4728	10.1578	9.66001	8.82389	11.2232	10.9733	10.6554	10.4755	10.0145	11.1883	11.1601	11.0745	10.9332	10.6546	11.1878	11.175	11.1423	11.12	10.8
PCA_1-010	10.7053	9.98496	9.62391	9.30248	8.76288	10.791	10.0054	9.65814	9.34632	8.69904	10.8665	10.1509	9.78508	9.49646	8.77065	11.0387	10.5488	10.2642	10.0591	9.6945	11.2228	11.0571	10.5488	10.4618	10.2304	11.2172	11.1671	10.8203	10.8551	10.8015
PCA_1-011	10.5406	9.897	9.62558	9.35609	8.78808	10.8173	9.93464	9.70451	9.39514	8.64706	10.7833	10.0795	9.80182	9.48401	8.77584	10.6362	10.5087	10.1903	9.89106	9.72198	10.7493	10.9902	10.4898	10.4368	10.1598	11.1565	11.1995	10.6676	10.7033	10.3575
PCA_1-012	10.6133	9.9144	9.58691	9.41515	8.68401	10.6368	9.95427	9.64429	9.3171	8.73434	10.7144	10.0999	9.75607	9.43666	8.7849	10.6557	10.3418	10.2139	10.0158	9.67298	10.6501	10.5342	10.5271	10.4353	10.1885	10.7606	10.6743	10.6612	10.6085	10.3624
PCA_1-013	10.5757	9.94703	9.57804	9.36556	8.57212	10.6621	9.97602	9.69921	9.35062	8.41193	10.7217	10.0946	9.7931	9.5008	8.67412	10.6548	10.3049	10.0961	9.97239	9.67448	10.6827	10.5253	10.4565	10.3863	10.192	10.6464	10.693	10.6316	10.6156	10.3805
PCA_1-014	10.5871	9.79854	9.5531	9.02798	8.592	10.6167	9.90447	9.62552	9.33074	8.47981	10.6411	9.99237	9.77134	9.42213	8.66883	10.6294	10.1926	10.1185	9.90336	9.72748	10.6191	10.3697	10.3443	10.1794	10.2056	10.6238	10.641	10.4123	10.3915	10.3903
PCA_1-015	10.5636	9.75377	9.5119	9.03157	8.53882	10.6499	9.95841	9.60425	9.22759	8.43254	10.7448	9.9837	9.76317	9.51704	8.64665	10.7007	10.2004	10.0502	9.89502	9.62725	10.6013	10.3622	10.3633	10.2279	10.1715	10.5674	10.5054	10.4679	10.3688	10.3474
PCA_1-016	10.3842	9.82761	9.27239	8.90828	8.38603	10.5137	9.9013	9.43576	8.91888	8.40217	10.4722	10.0205	9.73966	9.431	8.56741	10.586	10.2672	10.1385	9.89076	9.72105	10.6178	10.3581	10.2929	10.1987	10.1438	10.6521	10.5627	10.4979	10.3658	10.3471
PCA_1-017	10.3612	9.86467	9.28215	8.90782	8.41394	10.5331	9.80744	9.39723	8.91122	8.38904	10.4963	9.95556	9.71219	9.23343	8.5586	10.65	10.2417	10.1046	9.95593	9.47218	10.609	10.4358	10.3907	10.2045	10.1554	10.6453	10.485	10.4971	10.4693	10.3353
PCA_1-018	10.4011	9.87131	9.38026	8.8528	8.34861	10.4388	9.9217	9.42159	8.86213	8.3674	10.484	9.90881	9.64164	9.27667	8.58722	10.5303	10.2288	10.1472	9.86351	9.53348	10.7352	10.3898	10.3933	10.2526	10.1057	10.6888	10.5028	10.4311	10.3784	10.3907
PCA_1-019	10.4563	9.75869	9.30804	8.85032	8.28911	10.5131	9.92712	9.39149	8.94067	8.3988	10.5117	10.0744	9.64575	9.24966	8.53729	10.5825	10.195	10.1396	9.97019	9.25465	10.5389	10.4607	10.3487	10.2972	10.1984	10.6371	10.4509	10.3583	10.4458	10.2286
PCA_1-020	10.3217	9.7836	9.19878	8.86219	8.29296	10.4247	9.88088	9.30143	8.99997	8.43088	10.5846	9.91222	9.59834	9.21286	8.55991	10.5729	10.2196	10.0892	9.96024	9.29352	10.5781	10.3843	10.3567	10.2437	10.1625	10.5826	10.4988	10.4527	10.3504	10.2738
PCA_1-021	10.2125	9.83281	9.2491	8.85709	8.34669	10.4879	9.89264	9.36516	8.90879	8.26732	10.5921	9.96717	9.47849	9.21468	8.58121	10.5236	10.1637	10.1809	9.89089	9.29876	10.6549	10.3042	10.2856	10.2952	10.0928	10.5651	10.5198	10.4185	10.3704	10.1322
PCA_1-022	10.2339	9.71001	9.17167	8.86784	8.296	10.4033	9.77128	9.33955	8.81724	8.36641	10.4959	9.97537	9.45686	9.13535	8.63378	10.5959	10.2021	10.1468	10.0027	9.33206	10.6588	10.4645	10.4086	10.2693	9.92091	10.5173	10.439	10.419	10.4774	10.1049
PCA_1-023	10.3174	9.73312	9.23558	8.81012	8.38558	10.4156	9.77914	9.31939	8.92853	8.44467	10.4783	9.89926	9.5999	9.11164	8.6516	10.5665	10.1333	10.0946	9.97598	9.34151	10.498	10.3488	10.3011	10.3181	9.95135	10.5014	10.4714	10.4744	10.3817	10.2056
PCA_1-024	10.1969	9.70985	9.22934	8.85842	8.29466	10.2855	9.90869	9.37086	8.81543	8.36291	10.4993	9.97897	9.53367	9.06141	8.57323	10.4569	10.1801	10.0076	9.7945	9.34046	10.6229	10.3875	10.3363	10.2502	9.96573	10.5755	10.4971	10.4181	10.3887	10.2148
PCA_1-025	10.1521	9.7307	9.26777	8.86142	8.25072	10.2515	9.74417	9.33783	8.74237	8.43722	10.3249	9.95659	9.54386	9.02853	8.57344	10.54	10.1411	9.95549	9.74948	9.29805	10.4622	10.3908	10.244	10.2125	9.85977	10.5535	10.5459	10.3674	10.4484	10.1774
PCA_1-026	10.2799	9.62778	9.23834	8.87328	8.26091	10.3171	9.80858	9.24003	8.78392	8.37727	10.3627	9.85941	9.5737	9.0503	8.65399	10.4466	10.1577	9.97125	9.80322	9.33295	10.578	10.4157	10.2245	10.2777	9.85034	10.511	10.4906	10.4265	10.4457	10.2923
PCA_1-027	10.1957	9.61839	9.13063	8.78821	8.30048	10.3158	9.64433	9.2913	8.79696	8.49687	10.4826	9.92427	9.47155	8.97543	8.56602	10.4989	10.2046	9.88628	9.75264	9.25825	10.4301	10.3678	10.2158	10.2103	9.70694	10.5405	10.5449	10.3691	10.4797	10.1856
PCA_1-028	10.0656	9.53336	9.10121	8.75095	8.29262	10.2759	9.61924	9.29488	8.84861	8.42506	10.3831	9.89025	9.60147	9.03315	8.66089	10.478	10.1287	9.94345	9.78418	9.21177	10.5091	10.3475	10.3047	10.1809	9.70702	10.4856	10.4623	10.3674	10.4415	10.2093
PCA_1-029	10.1207	9.44294	9.27102	8.82707	8.40978	10.1457	9.64869	9.33644	8.83684	8.38415	10.3041	9.8228	9.46379	9.05589	8.72061	10.5453	10.1941	9.96042	9.56885	9.21819	10.5564	10.3624	10.3188	10.1924	9.75669	10.5095	10.5102	10.4215	10.453	10.0206
PCA_1-030	10.0367	9.51357	9.19713	8.81492	8.2449	10.2003	9.64275	9.21834	8.81381	8.42745	10.2597	9.65292	9.56412	9.05141	8.55552	10.4252	10.2672	10.0539	9.61731	9.32314	10.5616	10.3322	10.2707	10.1526	9.7659	10.5143	10.4467	10.4445	10.3756	10.1339
PCA_1-031	10.0696	9.51527	9.14083	8.84581	8.24959	10.1557	9.5323	9.24604	8.7931	8.45865	10.2322	9.75314	9.48213	9.00976	8.59917	10.3506	10.1221	9.94457	9.61138	9.20316	10.6275	10.4114	10.254	10.1257	9.88415	10.5357	10.5103	10.341	10.3265	10.1509
PCA_1-032	10.1532	9.55945	9.25673	8.83632	8.35907	10.1483	9.59188	9.34486	8.85912	8.37427	10.2558	9.64246	9.58353	9.10279	8.48123	10.5149	10.1744	9.98216	9.57428	9.24995	10.541	10.3737	10.2104	10.1381	9.74594	10.5213	10.5163	10.4228	10.3045	10.0499
PCA_1-033	10.1321	9.5867	9.13181	8.87055	8.28668	10.094	9.60651	9.31519	8.78127	8.34516	10.1958	9.82025	9.55208	8.92713	8.52187	10.3712	10.063	10.0232	9.6293	9.22903	10.5164	10.4131	10.258	10.1797	9.78577	10.5003	10.5289	10.4739	10.2822	10.2288
PCA_1-034	10.0943	9.48771	9.13492	8.86504	8.28712	10.2764	9.61458	9.30744	8.80461	8.37073	10.4136	9.73866	9.45914	8.89572	8.56278	10.4391	10.0239	9.98392	9.64482	9.14283	10.484	10.4145	10.2318	10.1598	9.73879	10.5715	10.5049	10.4039	10.3479	10.0116
PCA_1-035	10.1271	9.65806	9.20814	8.93371	8.33821	10.1605	9.6181	9.17606	8.8021	8.43035	10.3035	9.82586	9.37885	8.9056	8.40756	10.3733	10.0694	9.88093	9.64084	9.18018	10.422	10.5207	10.2173	10.1346	9.73104	10.4878	10.6111	10.4707	10.4225	9.95505
PCA_1-036	10.1459	9.56209	9.23451	8.83163	8.26136	10.193	9.62944	9.27806	8.83041	8.29554	10.3023	9.67019	9.40771	8.9955	8.42259	10.3993	10.0751	9.88443	9.67639	9.16149	10.5117	10.3939	10.2781	10.0236	9.65708	10.4828	10.4562	10.468	10.2917	9.93822
PCA_1-037	10.0667	9.56902	9.20773	8.84229	8.29041	10.1556	9.61392	9.25266	8.8608	8.33028	10.32	9.66055	9.15169	8.84994	8.58649	10.3922	10.1926	9.80002	9.57415	9.23663	10.4874	10.4368	10.2689	10.1464	9.62991	10.4148	10.5596	10.3314	10.3266	9.87083
PCA_1-038	10.0742	9.64699	9.15481	8.80612	8.3121	10.0945	9.59402	9.17015	8.7897	8.39368	10.3176	9.51861	9.18174	9.01935	8.43657	10.4333	9.75762	9.75789	9.53314	9.23693	10.4297	10.4677	10.2628	10.0914	9.7096	10.512	10.5832	10.3492	10.3861	9.91814
PCA_1-039	9.9955	9.63293	9.13639	8.99126	8.32582	10.1497	9.66408	9.16627	8.83115	8.37663	10.2589	9.62416	9.24851	9.02386	8.38061	10.517	9.94283	9.69084	9.69744	9.15318	10.5205	10.4282	10.2704	10.2046	9.6631	10.3991	10.4817	10.3905	10.4045	9.76914
PCA_1-040	10.0966	9.65774	9.20988	8.86707	8.27195	10.1841	9.6182	9.24536	8.87282	8.17535	10.2766	9.67043	9.27022	9.02072	8.42206	10.5786	9.94486	9.79346	9.65021	9.24524	10.4403	10.235	10.1488	10.1797	9.72039	10.5192	10.5702	10.4622	10.3486	9.70958
PCA_1-041	10.099	9.67099	9.18873	8.8625	8.38389	10.2186	9.73474	9.20801	8.95055	8.26704	10.2832	9.59635	9.39528	8.9789	8.48671	10.3594	9.89936	9.75825	9.56285	9.21901	10.4636	10.3976	10.1702	10.0557	9.77278	10.3629	10.5429	10.4644	10.3185	9.74241
PCA_1-042	10.2041	9.64423	9.24552	8.97497	8.38574	10.2069	9.63618	9.29505	8.88299	8.26716	10.4347	9.75214	9.30581	8.99135	8.50518	10.3788	9.85449	9.7724	9.63624	9.19908	10.4454	10.2506	10.144	10.1711	9.59341	10.4836	10.4474	10.3834	10.4323	9.8346
PCA_1-043	10.0365	9.7372	9.32917	8.87066	8.39887	10.1848	9.72956	9.23538	8.9565	8.16029	10.3887	9.6311	9.33055	9.00981	8.50961	10.3491	9.89316	9.71944	9.49706	9.14286	10.5687	10.0973	10.0646	9.99263	9.68981	10.5677	10.4875	10.288	10.4257	9.75075
PCA_1-044	10.1905	9.71865	9.25819	8.83897	8.36168	10.2987	9.6241	9.35989	8.92685	8.25668	10.3166	9.60748	9.28072	9.09209	8.4465	10.4906	9.80362	9.71936	9.53747	9.067	10.5575	10.0691	10.1439	10.0634	9.65851	10.4679	10.4866	10.3275	10.3015	9.79103
PCA_1-045	10.2654	9.70375	9.28539	8.97257	8.36918	10.1964	9.679	9.2282	8.86973	8.34675	10.2984	9.5734	9.25247	8.96396	8.42323	10.3029	9.93419	9.6033	9.62933	9.19432	10.4402	10.0075	10.0332	10.0194	9.73197	10.3704	10.397	10.2007	10.2719	9.78774
PCA_1-046	10.2965	9.55593	9.19609	8.85969	8.32316	10.303	9.50701	9.37987	8.86797	8.29532	10.4536	9.59027	9.26082	8.88649	8.50335	10.4047	9.79919	9.73641	9.47733	9.01677	10.3232	10.0829	9.99577	9.93964	9.60823	10.4247	10.2566	10.1725	10.1464	9.71098
PCA_1-047	10.1362	9.47483	9.36343	8.91815	8.55712	10.2644	9.65379	9.26824	8.89988	8.42162	10.1977	9.7432	9.16434	8.9394	8.42065	10.3961	9.83912	9.5991	9.56718	9.0256	10.3359	10.1642	10.0172	10.0167	9.6596	10.2684	10.2378	10.2156	10.1053	9.57615
PCA_1-048	10.1081	9.63357	9.21522	8.81103	8.58816	10.239	9.60906	9.20236	8.9383	8.34597	10.2722	9.56398	9.32204	9.00457	8.46086	10.2651	9.90511	9.62111	9.45599	9.05628	10.4525	10.1082	10.0429	9.91151	9.64099	10.3318	10.291	10.1933	10.2488	9.67666
PCA_1-049	10.1907	9.48655	9.33394	8.85011	8.56021	10.2096	9.61914	9.36232	8.97483	8.35032	10.4124	9.52608	9.26691	8.98724	8.52351	10.2573	9.83164	9.73237	9.51806	8.96762	10.4676	10.0211	9.92069	9.97101	9.66744	10.2793	10.3686	10.315	10.1893	9.60505
PCA_1-050	10.2665	9.71175	9.36066	8.89673	8.52807	10.2515	9.56883	9.33274	8.83269	8.24736	10.1709	9.51323	9.30978	8.90265	8.46435	10.2858	9.70458	9.72171	9.44759	9.0898	10.3348	10.0019	9.98919	10.0238	9.62774	10.1755	10.3495	10.2101	10.1473	9.72327
PCA_1-051	10.2474	9.51398	9.33675	8.91353	8.44799	10.2426	9.50415	9.2316	8.82411	8.32172	10.2098	9.54104	9.33716	8.97801	8.4765	10.2632	9.6562	9.62133	9.43897	9.03009	10.2575	10.1492	10.0461	10.0984	9.65109	10.2356	10.0942	10.0935	10.1546	9.78366
PCA_1-052	10.2604	9.50942	9.39309	9.03317	8.45128	10.2121	9.69071	9.24654	8.86806	8.3789	10.3693	9.63946	9.28929	8.921	8.4247	10.2332	9.78252	9.66372	9.53689	8.92498	10.2761	10.2626	9.9649	10.038	9.69913	10.25	10.3819	10.0663	10.2498	9.5766
PCA_1-053	10.0283	9.58602	9.34941	8.79519	8.38959	10.1782	9.63105	9.19012	8.95438	8.36282	10.3064	9.57504	9.28914	8.89861	8.47743	10.2031	9.74535	9.62525	9.46408	8.93054	10.2456	10.1102	9.93608	9.99782	9.60967	10.2492	10.2097	10.1825	10.2278	9.72402
PCA_1-054	10.1428	9.66248	9.30363	8.84607	8.55184	10.2347	9.64074	9.26408	8.87558	8.40152	10.249	9.61802	9.42765	8.97557	8.52903	10.244	9.80999	9.62852	9.44228	8.89892	10.2491	10.0076	9.96953	9.95295	9.64316	10.2422	10.1218	10.0968	10.1936	9.66406
PCA_1-055	10.214	9.68307	9.15712	8.89044	8.72904	10.1332	9.57969	9.24231	8.8986	8.41317	10.1803	9.63314	9.32777	9.0184	8.52573	10.1335	9.79624	9.69229	9.41746	9.12913	10.0949	10.0614	10.0746	10.043	9.62738	10.0215	10.2283	10.1803	10.3042	9.62597
PCA_1-056	10.2083	9.73352	9.29524	8.92042	8.55252	10.0836	9.61695	9.17503	8.90653	8.37018	10.1828	9.64574	9.35432	8.96477	8.55556	10.084	9.67411	9.56827	9.46797	8.99879	10.165	10.2477	10.0109	10.056	9.49588	10.1678	10.2017	10.1743	10.1942	9.64635
PCA_1-057	10.1529	9.50812	9.30076	8.96781	8.50382	10.3983	9.6214	9.17846	8.84106	8.29729	10.312	9.69386	9.38148	8.93493	8.40322	10.1044	9.74028	9.61108	9.41385	8.97271	10.305	10.1508	9.95079	10.0973	9.6027	10.108	10.1752	10.0964	10.1477	9.64346
PCA_1-058	10.2592	9.53265	9.26339	9.04418	8.61568	10.1769	9.63703	9.37603	8.78768	8.40506	10.2558	9.76842	9.37399	9.03112	8.48358	10.2818	9.76137	9.58265	9.49414	8.86344	10.1835	10.028	10.0097	10.113	9.67739	10.131	10.168	10.097	10.1617	9.72145
PCA_1-059	10.1647	9.51348	9.25183	8.97876	8.45412	10.1978	9.57348	9.30263	8.84061	8.49665	10.1256	9.62793	9.36697	8.9624	8.56209	10.0894	9.81632	9.57399	9.46229	8.82936	10.1432	9.99349	10.0557	9.98583	9.59178	10.1643	10.1106	10.186	10.1245	9.67799
PCA_1-060	10.1184	9.49666	9.17169	8.98121	8.37433	10.3162	9.60734	9.3503	8.78381	8.38203	10.2128	9.58722	9.39006	9.10847	8.47313	10.0362	9.70324	9.70504	9.52167	8.90439	10.173	10.1515	10.1751	10.1092	9.56721	10.1853	10.1802	10.1363	10.2521	9.73923
PCA_1-061	10.076	9.61496	9.16563	8.92538	8.38464	10.291	9.6801	9.37435	8.84998	8.2757	9.94197	9.53236	9.34381	8.9929	8.48205	10.1287	9.91627	9.60661	9.48315	8.90052	10.2119	10.0035	10.1643	9.93303	9.62907	10.171	10.2423	10.2103	10.1393	9.6728
PCA_1-062	10.057	9.57081	9.22621	8.87864	8.42993	10.2428	9.59202	9.33938	8.85219	8.22532	10.1002	9.54853	9.40745	9.02733	8.44774	10.2318	9.81315	9.70246	9.52394	9.03103	10.1614	10.0563	10.2121	10.0812	9.53288	10.1767	10.3136	10.1956	10.14	9.65293
PCA_1-063	10.0106	9.66656	9.29023	8.94803	8.65326	10.2567	9.5939	9.30296	8.92414	8.39454	10.1928	9.53625	9.40565	9.10628	8.692	10.0773	9.83809	9.64129	9.54917	9.00367	10.2112	10.0973	10.0379	10.0102	9.36769	10.2886	10.2264	10.1086	10.2748	9.52619
PCA_1-064	10.0487	9.70182	9.27234	8.99895	8.29877	10.0635	9.60469	9.36017	8.92179	8.29375	10.146	9.77982	9.44325	9.08975	8.49777	9.97925	9.84607	9.69732	9.4806	8.97655	10.2573	10.133	10.154	9.91534	9.44687	10.1612	10.1647	10.2567	10.3636	9.78904
PCA_1-065	9.96398	9.51154	9.30365	9.08563	8.40001	10.1253	9.52104	9.3052	8.95902	8.32006	10.049	9.61714	9.40704	9.03377	8.55783	10.196	9.95174	9.78353	9.48047	8.84877	10.1523	10.0351	9.9358	9.84249	9.65513	10.2598	10.2673	10.2715	10.2498	9.6951
PCA_1-066	9.93309	9.62776	9.16981	9.12479	8.38005	10.1393	9.63343	9.38212	8.97964	8.19986	10.1278	9.60477	9.42705	9.07738	8.58643	10.1524	9.70789	9.67058	9.45625	8.86016	10.2719	10.161	9.88991	9.92519	9.49697	10.2006	10.3932	10.2758	10.2439	9.76458
PCA_1-067	9.91862	9.5638	9.30604	9.01182	8.43825	10.2109	9.64614	9.40964	9.03692	8.32095	10.1508	9.64476	9.46472	9.05713	8.50417	10.0845	9.72812	9.79825	9.48004	9.0066	10.1588	10.0139	10.047	9.87589	9.50541	10.2154	10.2303	10.213	10.1612	9.71152
PCA_1-068	10.0004	9.56021	9.38859	8.97409	8.43158	10.1494	9.59119	9.38421	8.97239	8.49745	10.1532	9.63275	9.4453	9.02256	8.57896	10.2508	9.7104	9.56855	9.58347	8.93268	10.2587	10.0999	9.99051	10.0099	9.33733	10.3458	10.1754	10.246	10.192	9.7716
PCA_1-069	10.0295	9.70556	9.3924	8.93035	8.47432	10.0644	9.55041	9.24597	9.04805	8.4163	10.3249	9.58337	9.54827	9.07833	8.50559	10.1535	9.82827	9.68348	9.47369	8.94902	10.2402	10.0484	9.9044	9.87598	9.39075	10.3322	10.2154	10.1853	10.2192	9.67962
PCA_1-070	9.99921	9.6915	9.28924	8.92142	8.54705	10.1695	9.69057	9.35046	9.03689	8.42481	10.1938	9.56838	9.35651	9.28073	8.51348	10.1976	9.71775	9.77206	9.5502	8.92942	10.1651	9.99238	9.91125	9.89211	9.39056	10.2373	10.3716	10.3082	10.1826	9.70127
PCA_1-071	10.1353	9.6182	9.42714	9.18414	8.43725	10.0969	9.74106	9.39145	8.98352	8.29212	10.0516	9.7349	9.49161	9.14191	8.55446	10.1406	9.80886	9.73997	9.2139	9.01152	10.4528	9.91813	10.0818	9.80742	9.40089	10.3425	10.2941	10.2373	10.1132	9.59016
PCA_1-072	10.0364	9.73172	9.36954	9.06495	8.75674	10.0607	9.65111	9.29043	9.03557	8.35856	10.1471	9.68732	9.38369	9.11183	8.64091	10.1186	9.73832	9.80065	9.38609	8.86911	10.1692	9.85168	10.0503	9.95652	9.40631	10.2711	10.3062	10.3858	10.1734	9.73822
PCA_1-073	10.0269	9.83775	9.30806	9.06835	8.58824	9.96068	9.81238	9.35551	9.00296	8.32713	10.1181	9.74723	9.56499	9.02093	8.56426	10.1753	9.67487	9.64865	9.48574	8.82384	10.2346	9.8422	9.97778	9.91669	9.35052	10.2801	10.2789	10.2034	10.1279	9.62179
PCA_1-074	10.1662	9.62351	9.40927	8.91642	8.60145	10.0665	9.72033	9.33411	8.94951	8.37216	10.1044	9.64202	9.50095	9.17473	8.57778	10.2692	9.75456	9.60653	9.45946	8.89635	10.3745	9.91296	10.1041	9.93369	9.34539	10.246	10.1743	10.2033	10.1691	9.82776
PCA_1-075	10.032	9.76498	9.23325	8.9715	8.68609	10.1623	9.72499	9.2818	9.01054	8.47187	10.2222	9.60513	9.41723	9.05764	8.50762	10.1585	9.73563	9.69946	9.46558	8.95061	10.2083	9.93003	10.0329	9.98916	9.5653	10.1879	10.2801	10.2792	10.3475	9.72949
PCA_1-076	10.1329	9.66887	9.28753	9.04006	8.79637	10.0659	9.66092	9.38309	8.94312	8.41709	10.2355	9.51751	9.42516	9.20338	8.4412	10.3209	9.72402	9.62207	9.64514	8.95143	10.2799	10.0509	10.1082	9.93444	9.46812	10.2891	10.2287	10.2578	10.2527	9.77334
PCA_1-077	10.1687	9.75397	9.33502	9.13084	8.78081	10.1093	9.86312	9.40093	9.1275	8.37041	10.2421	9.64513	9.47852	9.17271	8.49379	10.1673	9.84367	9.69825	9.53224	8.96771	10.2092	9.88505	9.97772	9.97414	9.43965	10.3488	10.2331	10.4251	10.1658	9.71606
PCA_1-078	10.1417	9.71073	9.35484	9.02347	8.77761	10.1204	9.80541	9.43244	9.02878	8.53508	10.0987	9.75081	9.53139	9.1133	8.55267	10.2194	9.77373	9.71286	9.42459	9.02243	10.1012	10.1066	10.033	9.96426	9.5148	10.3305	10.2091	10.1491	10.2631	9.67141
PCA_1-079	10.0769	9.70109	9.28936	9.06511	8.85167	10.1348	9.69621	9.2278	9.03695	8.40322	10.4269	9.73435	9.51824	9.09457	8.60134	10.1411	9.71841	9.78762	9.48178	8.81405	10.1946	9.88817	10.163	9.80036	9.47561	10.4086	10.2629	10.4046	10.1639	9.71454
PCA_1-080	10.1447	9.77534	9.43112	9.04389	8.74368	10.2068	9.72846	9.41815	9.02454	8.51631	10.2668	9.70337	9.51379	9.2286	8.46042	10.2452	9.96164	9.77198	9.44654	8.91518	10.2741	10.1009	10.0546	9.73274	9.44207	10.3478	10.295	10.3028	10.3086	9.57538
PCA_1-081	10.2576	9.83516	9.55527	9.10324	8.52904	10.1076	9.68405	9.19814	9.11569	8.42546	10.2225	9.71245	9.48073	9.27232	8.52911	10.2918	9.69801	9.65306	9.55249	9.20051	10.3437	9.93693	10.0468	9.92635	9.54867	10.2222	10.2136	10.414	10.2442	9.64015
PCA_1-082	10.198	9.81416	9.31325	9.14897	8.78451	10.2348	9.80668	9.45715	9.02968	8.57393	10.1822	9.59596	9.46377	9.09468	8.48078	10.2026	9.73321	9.66126	9.4014	9.00619	10.4339	10.0129	10.0495	9.94232	9.26572	10.3389	10.2217	10.2691	10.131	9.63226
PCA_1-083	10.1243	9.87255	9.44575	9.07075	8.73262	10.1012	9.80401	9.34078	8.91593	8.64259	10.1919	9.77486	9.58632	9.2136	8.6004	10.427	9.72627	9.63281	9.65693	8.98409	10.1089	9.96509	10.2125	9.94511	9.33486	10.2843	10.2718	10.1183	10.2602	9.51701
PCA_1-084	10.0575	9.86089	9.36356	9.06111	8.73659	10.001	9.67677	9.42117	9.1617	8.58617	10.3675	9.91052	9.42927	9.2764	8.39538	10.4508	9.91475	9.85616	9.51284	8.90291	10.2801	9.96133	10.1284	9.7602	9.57825	10.2868	10.1742	10.2054	10.1985	9.65214
PCA_1-085	10.134	9.82003	9.48932	9.07354	8.86128	10.1477	9.76873	9.29479	9.14293	8.57108	10.2825	9.81973	9.57491	9.35223	8.47647	10.4426	9.88397	9.81502	9.46755	8.95053	10.2803	9.96685	10.0008	9.73207	9.53064	10.3525	10.2589	10.4075	10.1305	9.66989
PCA_1-086	10.0704	9.84082	9.42765	9.2009	9.01518	10.1853	9.66758	9.41178	9.09069	8.35432	10.2809	9.79756	9.53905	9.25356	8.65378	10.2054	9.82412	9.86218	9.48522	8.96622	10.3819	9.83885	10.0941	9.92155	9.42339	10.2574	10.2102	10.2243	10.2789	9.58717
PCA_1-087	10.1474	9.67832	9.38624	9.01065	8.96711	10.2996	9.74935	9.49641	9.18337	8.60099	10.4424	9.87178	9.57877	9.31773	8.56391	10.193	9.74474	9.76546	9.61303	9.06824	10.2834	9.91992	9.97577	9.88932	9.50001	10.4068	10.1891	10.3056	10.2131	9.72391
PCA_1-088	10.3912	9.93356	9.36895	9.27546	8.91574	10.4366	9.86016	9.42104	9.15617	8.67465	10.5153	9.89912	9.58926	9.28566	8.594	10.3607	9.73923	9.87958	9.62335	9.02941	10.434	9.96574	10.034	9.89209	9.38104	10.3956	10.2055	10.4162	10.2695	9.58025
PCA_1-089	10.1285	9.87909	9.53571	9.12915	9.09068	10.3371	9.91708	9.48076	9.11173	8.69592	10.3986	9.77514	9.56972	9.32885	8.58705	10.2693	9.73954	9.81617	9.44557	9.06454	10.299	9.95395	10.137	9.95089	9.3988	10.4707	10.4916	10.4196	10.3111	9.55658
PCA_1-090	10.3701	9.79446	9.50157	9.36457	9.31823	10.2823	9.84459	9.4291	9.15743	8.56297	10.2881	9.76262	9.61664	9.14098	8.63914	10.3286	9.85587	9.73863	9.65864	9.05872	10.184	10.0977	10.1485	10.055	9.26166	10.3894	10.4809	10.1802	10.2027	9.66297
PCA_1-091	10.3038	9.84604	9.60392	9.16324	8.89745	10.2059	9.90051	9.49311	9.24545	8.62366	10.3577	9.82869	9.5904	9.24163	8.67244	10.2779	9.76515	9.79082	9.56727	9.01455	10.3811	10.1077	9.9334	10.1541	9.47402	10.2655	10.3889	10.265	10.3294	9.60267
PCA_1-092	10.4101	9.86011	9.39164	9.25005	8.81097	10.2627	9.71416	9.36779	9.08819	8.55704	10.2471	9.81319	9.44112	9.28179	8.71068	10.28	9.83219	9.87406	9.6432	9.17949	10.2922	9.98935	9.84641	10.1997	9.40138	10.3014	10.3487	10.184	10.3158	9.60848
PCA_1-093	10.34	9.82174	9.44026	9.31028	9.04558	10.4574	9.71242	9.55751	9.36108	8.65368	10.4206	9.6782	9.4137	9.30114	8.69302	10.4702	9.78414	9.81443	9.63642	9.08231	10.3018	9.91488	9.97105	10.1513	9.53755	10.4134	10.3514	10.215	10.0907	9.47837
PCA_1-094	10.1113	9.88738	9.41753	9.19936	9.03058	10.2836	9.77851	9.48913	9.29238	8.60087	10.397	9.70302	9.51459	9.15281	8.74817	10.3026	9.76585	9.77658	9.6147	9.00912	10.2694	10.0168	9.89229	10.0382	9.41093	10.5098	10.3239	10.0861	10.2014	9.69233
PCA_1-095	10.1438	9.85388	9.40907	9.1921	9.14498	10.4284	9.66048	9.38452	9.20604	8.71614	10.3498	9.74426	9.47105	9.25711	8.75237	10.3892	9.95224	9.89941	9.73739	9.1238	10.364	9.98666	9.81836	10.067	9.56379	10.3799	10.2668	10.2105	10.0736	9.65789
PCA_1-096	10.3651	9.71302	9.54254	9.16963	8.97624	10.4319	9.57592	9.50375	9.27466	8.61864	10.3275	9.75133	9.64952	9.35712	8.58291	10.273	9.81701	9.92722	9.67652	9.00208	10.2976	9.97928	9.9857	9.9621	9.35729	10.3745	10.1932	10.185	9.99683	9.4301
PCA_1-097	10.3934	9.90745	9.59017	9.22431	8.99243	10.5825	9.92394	9.5822	9.27062	8.74285	10.311	9.78839	9.68546	9.54097	8.77342	10.3751	9.84043	9.98157	9.71002	9.30114	10.2399	10.0451	10.008	9.84485	9.43411	10.3639	10.3805	9.99609	10.1655	9.64243
PCA_1-098	10.4908	9.86819	9.5487	9.37337	8.92121	10.2439	10.0502	9.53418	9.2433	8.67507	10.2466	9.85778	9.51056	9.14703	8.75776	10.2695	10.0009	9.95088	9.81388	9.07077	10.1943	9.96979	10.1158	10.0593	9.33805	10.4664	10.276	10.2242	10.0683	9.57201
PCA_1-099	10.3545	10.0337	9.61328	9.30542	8.88975	10.4737	9.76275	9.68675	9.35079	8.79618	10.4912	9.80391	9.64021	9.3261	8.77395	10.4045	9.86159	10.0282	9.72199	9.21928	10.3698	9.99743	9.92708	9.80421	9.49066	10.3038	10.4462	10.1767	10.1965	9.52937
PCA_1-100	10.3967	10.0654	9.59173	9.11835	9.03406	10.3487	9.96398	9.50443	9.2181	8.84549	10.1734	9.85586	9.49292	9.3098	8.7418	10.4499	9.79717	9.95722	9.91501	9.15666	10.3015	10.2528	10.1522	9.96747	9.40655	10.3983	10.222	10.1833	10.1084	9.4909

## Sheet: lambda_0.0021544
Row	kernel_0mm_parcels_100	kernel_0mm_parcels_200	kernel_0mm_parcels_400	kernel_0mm_parcels_1000	kernel_0mm_vertex	kernel_5mm_parcels_100	kernel_5mm_parcels_200	kernel_5mm_parcels_400	kernel_5mm_parcels_1000	kernel_5mm_vertex	kernel_10mm_parcels_100	kernel_10mm_parcels_200	kernel_10mm_parcels_400	kernel_10mm_parcels_1000	kernel_10mm_vertex	kernel_20mm_parcels_100	kernel_20mm_parcels_200	kernel_20mm_parcels_400	kernel_20mm_parcels_1000	kernel_20mm_vertex	kernel_30mm_parcels_100	kernel_30mm_parcels_200	kernel_30mm_parcels_400	kernel_30mm_parcels_1000	kernel_30mm_vertex	kernel_40mm_parcels_100	kernel_40mm_parcels_200	kernel_40mm_parcels_400	kernel_40mm_parcels_1000	kernel_40mm_vertex
PCA_1-001	12.2079	12.1118	12.1238	12.0611	11.6169	12.3048	12.1941	12.2107	12.1702	11.9075	12.3462	12.2405	12.2884	12.2361	12.0943	12.3305	12.2911	12.2751	12.3109	12.1759	12.3009	12.2361	12.2624	12.2986	12.1763	12.2297	12.202	12.2142	12.2593	12.1665
PCA_1-002	12.203	12.145	12.0925	12.0586	10.8174	12.3161	12.2342	12.1934	12.1654	11.0108	12.3385	12.2832	12.2525	12.2539	11.6023	12.3072	12.2947	12.3089	12.322	12.1576	12.2762	12.2483	12.2394	12.3162	12.1924	12.2466	12.2096	12.2369	12.2885	12.2166
PCA_1-003	11.8343	11.3631	10.9846	10.5458	10.8238	11.825	11.3917	11.0284	10.5649	10.9186	11.7804	11.4651	11.1989	10.7262	10.9434	11.8005	11.5359	11.3828	11.0889	11.3599	11.7644	11.5859	11.4887	11.3002	11.4462	11.8252	11.617	11.53	11.4091	11.4959
PCA_1-004	11.0206	10.8007	10.864	10.5154	9.72925	11.0882	10.9356	10.9604	10.5766	9.78167	11.2146	11.0662	11.0422	10.8046	9.98815	11.2612	11.2869	11.244	11.0571	10.8407	11.2957	11.3529	11.2719	11.1888	10.9207	11.3262	11.3461	11.2594	11.1991	11.0137
PCA_1-005	11.0096	10.7362	10.6607	10.1813	9.07821	11.1218	10.8599	10.7571	10.2639	9.38168	11.2036	10.9733	10.9824	10.6104	9.91264	11.2576	11.1179	11.1599	11.0685	10.8637	11.244	11.1811	11.1842	11.1747	10.9421	11.1831	11.1884	11.218	11.1971	10.9428
PCA_1-006	11.0261	10.6318	10.3921	9.29325	8.91723	11.0924	10.7541	10.5508	9.61702	9.41398	11.1711	10.912	10.7654	10.5053	9.85364	11.1718	11.1502	11.1242	11.0311	10.8555	11.2141	11.2091	11.303	11.2149	10.9491	11.1931	11.158	11.2557	11.1804	10.9199
PCA_1-007	10.7534	10.3711	9.88128	9.31789	8.72254	10.9263	10.7185	9.96081	9.38498	8.71352	11.0328	10.961	10.7072	9.86886	8.76075	11.1775	11.1525	11.1658	11.0149	10.4543	11.1629	11.2259	11.2283	11.1398	10.8278	11.1544	11.2058	11.2561	11.1728	11.0212
PCA_1-008	10.7525	10.1559	9.87895	9.33679	8.74193	10.9087	10.312	9.90665	9.38069	8.67734	10.9911	10.6653	10.2482	9.68124	8.80155	11.146	11.1672	10.96	10.8208	10.419	11.1781	11.1636	11.1273	10.9759	10.7954	11.1438	11.2066	11.2045	11.1061	10.7947
PCA_1-009	10.8634	10.1495	9.89902	9.3298	8.75454	10.9373	10.294	10.0445	9.35733	8.72702	11.038	10.4673	10.2226	9.68103	8.8205	11.1601	10.9302	10.5973	10.4966	9.97232	11.1665	11.1925	11.0678	10.9548	10.704	11.1847	11.1689	11.1934	11.1576	10.8059
PCA_1-010	10.7029	9.95271	9.53576	9.33376	8.75055	10.7802	9.97448	9.66647	9.27064	8.72262	10.8222	10.0652	9.83438	9.44707	8.75683	11.0513	10.5976	10.2492	10.0087	9.66833	11.2525	11.0404	10.4991	10.4446	10.198	11.2376	11.2071	10.8032	10.8394	10.844
PCA_1-011	10.5662	9.93384	9.59602	9.37408	8.74995	10.8359	9.999	9.65832	9.34575	8.66458	10.8469	10.1043	9.82942	9.49765	8.75053	10.7018	10.4423	10.1483	9.94323	9.75757	10.7771	11.0649	10.5044	10.4353	10.2466	11.082	11.2034	10.6965	10.7182	10.3844
PCA_1-012	10.4923	9.92358	9.58464	9.38238	8.752	10.5734	10.0003	9.66802	9.40206	8.68378	10.8197	10.1547	9.77604	9.45107	8.75652	10.6929	10.3467	10.185	9.93279	9.67403	10.7121	10.5278	10.5063	10.4369	10.1992	10.7419	10.6871	10.6818	10.6863	10.3765
PCA_1-013	10.5729	9.8991	9.62398	9.32281	8.60686	10.6875	9.95398	9.64248	9.33463	8.42714	10.743	10.1005	9.82604	9.50239	8.7143	10.6229	10.2977	10.113	9.92058	9.70004	10.6664	10.5236	10.4385	10.3965	10.2684	10.7518	10.6545	10.6042	10.5838	10.3337
PCA_1-014	10.603	9.79742	9.57135	9.09925	8.48825	10.6885	9.86562	9.58881	9.33364	8.46085	10.7142	9.98308	9.73599	9.4493	8.65139	10.7491	10.191	10.056	9.91953	9.65506	10.5473	10.3699	10.2979	10.2613	10.2487	10.6369	10.6174	10.391	10.339	10.3723
PCA_1-015	10.544	9.80625	9.53495	9.11127	8.49866	10.6663	9.88363	9.60395	9.25484	8.37655	10.6974	9.94287	9.77545	9.47154	8.63368	10.7103	10.1616	10.11	9.99024	9.69195	10.6221	10.3411	10.3728	10.2256	10.1652	10.6337	10.553	10.569	10.3025	10.3389
PCA_1-016	10.4667	9.88798	9.29852	8.90683	8.37953	10.4141	9.88294	9.4453	8.92227	8.41715	10.524	9.9421	9.85065	9.38266	8.57949	10.5587	10.2412	10.1332	9.92589	9.65214	10.6661	10.3104	10.3315	10.2529	10.1852	10.6885	10.5247	10.4604	10.4204	10.3501
PCA_1-017	10.3569	9.85206	9.29476	8.90899	8.36148	10.4582	9.8853	9.38697	8.96219	8.36947	10.4673	9.95473	9.7644	9.2984	8.61479	10.6181	10.2118	10.1092	9.88281	9.51949	10.5335	10.4193	10.346	10.2384	10.1793	10.6031	10.5368	10.5769	10.4284	10.35
PCA_1-018	10.4539	9.80037	9.29184	8.8955	8.332	10.5332	9.89541	9.41892	8.89891	8.38302	10.4701	9.99514	9.71627	9.25502	8.55908	10.5723	10.2873	10.0021	9.91975	9.51052	10.5869	10.3996	10.2893	10.2537	10.1641	10.67	10.502	10.4237	10.4494	10.2391
PCA_1-019	10.3367	9.77755	9.28962	8.81328	8.28472	10.5015	9.8573	9.38335	8.96625	8.41421	10.5189	10.0094	9.64788	9.2957	8.54609	10.5662	10.2246	10.1194	9.90778	9.2724	10.5939	10.3556	10.2924	10.2448	10.2114	10.6793	10.4974	10.3842	10.4312	10.2202
PCA_1-020	10.2862	9.72354	9.24561	8.89835	8.25825	10.4935	9.92194	9.30451	8.91341	8.40697	10.5937	10.0604	9.57888	9.27242	8.56662	10.5635	10.2207	10.1031	9.89441	9.31662	10.6086	10.3684	10.3261	10.2486	10.213	10.5327	10.4661	10.4644	10.4332	10.2839
PCA_1-021	10.3754	9.76298	9.21582	8.89094	8.28955	10.475	9.7879	9.34128	8.95478	8.34136	10.5487	10.041	9.60517	9.23906	8.66106	10.5966	10.126	10.057	9.92178	9.28067	10.5726	10.2839	10.2365	10.3295	10.1778	10.5621	10.5085	10.4479	10.3548	10.2115
PCA_1-022	10.325	9.67933	9.23898	8.80889	8.31966	10.3231	9.75719	9.36157	8.9495	8.33192	10.5187	10.0232	9.47604	9.15566	8.6481	10.5228	10.2512	10.0555	9.98516	9.29064	10.563	10.3588	10.3186	10.2388	10.0014	10.6931	10.4146	10.4935	10.3836	10.1562
PCA_1-023	10.3161	9.77407	9.23553	8.83888	8.2936	10.3811	9.80976	9.37891	8.79075	8.29742	10.5642	9.96731	9.52261	9.14325	8.52876	10.6183	10.1455	9.96335	9.91727	9.33451	10.5167	10.3357	10.3504	10.3698	9.9925	10.499	10.425	10.5077	10.3926	10.1633
PCA_1-024	10.1841	9.79521	9.22308	8.78421	8.28812	10.2479	9.74529	9.3432	8.83548	8.38923	10.4886	9.86648	9.59159	9.0712	8.59123	10.5675	10.1292	9.92777	9.79678	9.25942	10.6029	10.3625	10.3602	10.2384	9.916	10.7386	10.4739	10.437	10.4707	10.072
PCA_1-025	10.1826	9.68778	9.2225	8.84865	8.21383	10.2818	9.85692	9.40344	8.76341	8.33232	10.4172	9.80808	9.51867	9.01651	8.59851	10.545	10.2223	9.92953	9.74049	9.3041	10.4786	10.3786	10.2144	10.1898	9.79305	10.5386	10.5425	10.4261	10.3812	10.1964
PCA_1-026	10.1981	9.6691	9.19659	8.77399	8.2905	10.3479	9.78966	9.3197	8.8045	8.38995	10.3806	9.9041	9.59566	8.96629	8.71366	10.5007	10.1137	9.93142	9.78775	9.34068	10.6241	10.3744	10.2282	10.2903	9.79845	10.5542	10.506	10.4516	10.3942	10.1888
PCA_1-027	10.2041	9.55807	9.07975	8.78355	8.27247	10.3223	9.65984	9.26502	8.77298	8.3796	10.3721	9.94374	9.52155	8.97845	8.6505	10.493	10.2165	9.97239	9.82115	9.32832	10.5902	10.39	10.2147	10.2036	9.75379	10.4785	10.5174	10.4538	10.4709	10.2863
PCA_1-028	10.1511	9.58869	9.12675	8.77167	8.21851	10.2846	9.63251	9.2797	8.79993	8.47337	10.4157	9.76721	9.59255	9.05591	8.56227	10.5072	10.2348	9.99192	9.73071	9.24258	10.5654	10.3749	10.2294	10.2163	9.71658	10.5187	10.5988	10.4775	10.3995	10.2677
PCA_1-029	10.2357	9.62532	9.2545	8.86142	8.29042	10.2248	9.66868	9.33993	8.88448	8.40446	10.3519	9.80738	9.53819	9.00458	8.6303	10.4691	10.1647	9.98553	9.59604	9.33381	10.5267	10.4132	10.291	10.1427	9.79754	10.5625	10.4698	10.419	10.4403	10.1377
PCA_1-030	10.1605	9.57677	9.27427	8.79691	8.30569	10.1712	9.49374	9.32229	8.87072	8.42296	10.264	9.65207	9.5507	9.01905	8.55987	10.4583	10.2023	9.91755	9.68725	9.34638	10.5209	10.3523	10.353	10.1696	9.76664	10.4687	10.5395	10.3619	10.3236	10.0971
PCA_1-031	10.1194	9.51562	9.15944	8.94547	8.27533	10.2133	9.56207	9.19824	8.85873	8.4018	10.1739	9.63848	9.54295	8.99832	8.6145	10.435	10.2431	9.9661	9.71551	9.2865	10.5593	10.5308	10.3146	10.0772	9.84393	10.5145	10.5763	10.3526	10.2658	10.1618
PCA_1-032	10.1016	9.52177	9.13658	8.78285	8.24929	10.1331	9.60475	9.2345	8.88442	8.33177	10.3485	9.70717	9.43874	9.00215	8.6076	10.3332	10.1564	10.0721	9.62081	9.19845	10.6014	10.3402	10.2834	10.1147	9.80275	10.4572	10.5576	10.4465	10.3447	10.2266
PCA_1-033	10.1191	9.4668	9.18189	8.87091	8.27531	10.1745	9.52846	9.22874	8.83826	8.28784	10.199	9.71218	9.51634	8.94236	8.50661	10.3254	10.1219	9.9335	9.64241	9.25425	10.5289	10.4121	10.2264	10.1515	9.72538	10.5017	10.5297	10.4631	10.3904	10.0819
PCA_1-034	10.1403	9.53581	9.22498	8.81402	8.36253	10.1248	9.60235	9.32459	8.7437	8.31897	10.1418	9.84406	9.54596	8.95279	8.53913	10.3938	10.1168	10.0188	9.79373	9.09441	10.5291	10.4332	10.1723	10.0713	9.70018	10.6772	10.5147	10.4242	10.3096	10.1385
PCA_1-035	10.1703	9.57006	9.14642	8.89062	8.31503	10.1213	9.70972	9.17687	8.78313	8.29152	10.3184	9.68951	9.24343	8.96847	8.47989	10.2989	10.1003	9.9014	9.75136	9.13852	10.4142	10.5392	10.1983	10.044	9.79113	10.5337	10.5167	10.469	10.3415	9.82077
PCA_1-036	10.1505	9.58967	9.23741	8.82859	8.28572	10.1464	9.64667	9.23243	8.90001	8.40378	10.2688	9.68347	9.29028	8.99368	8.52512	10.3101	10.0413	9.81103	9.70782	9.18008	10.4942	10.3441	10.2974	10.1113	9.68283	10.4642	10.6162	10.4407	10.3153	9.86722
PCA_1-037	10.18	9.69047	9.09443	8.7826	8.23851	10.2558	9.61836	9.2523	8.86731	8.40207	10.2427	9.67744	9.28181	9.02318	8.44834	10.4624	10.0557	9.69997	9.52139	9.20864	10.3403	10.3246	10.3368	10.1044	9.85649	10.3627	10.6458	10.351	10.2884	9.79327
PCA_1-038	10.0656	9.63413	9.19977	8.86166	8.28013	10.1272	9.56884	9.25418	8.90861	8.39549	10.3243	9.65773	9.30913	9.01955	8.54343	10.4549	9.82071	9.77485	9.67371	9.21476	10.43	10.3695	10.2589	10.0666	9.66847	10.3979	10.4619	10.5537	10.3711	9.78718
PCA_1-039	10.1732	9.66898	9.19916	8.79114	8.2393	10.1232	9.57678	9.30331	8.92358	8.38121	10.2908	9.7017	9.24488	9.09458	8.46361	10.5032	9.90566	9.74795	9.55171	9.18695	10.398	10.3539	10.315	10.037	9.66939	10.3369	10.4644	10.4097	10.2972	9.72247
PCA_1-040	10.0324	9.62672	9.17215	8.91084	8.34661	10.2209	9.74494	9.17659	8.80309	8.22386	10.3836	9.62852	9.29183	8.96816	8.56312	10.4296	9.96321	9.68885	9.56867	9.17403	10.4669	10.2536	10.279	10.1439	9.64201	10.4465	10.5112	10.3422	10.278	9.72547
PCA_1-041	10.0879	9.63496	9.22256	8.96791	8.32562	10.2977	9.68463	9.22635	8.9305	8.26447	10.3397	9.56712	9.27982	8.99269	8.40837	10.4914	9.88659	9.7709	9.54095	9.26647	10.4102	10.2424	10.107	10.1212	9.74966	10.5066	10.4803	10.4399	10.5066	9.61708
PCA_1-042	10.2031	9.62559	9.31598	8.82909	8.28546	10.2917	9.67575	9.16307	8.91782	8.25652	10.4022	9.63053	9.28531	8.97218	8.53985	10.3846	9.91578	9.83615	9.66838	9.14844	10.3639	10.1848	10.1435	10.1436	9.61841	10.5124	10.4689	10.2311	10.4579	9.76455
PCA_1-043	10.2331	9.71133	9.2503	8.88148	8.32929	10.3203	9.73358	9.27524	8.88161	8.25526	10.3075	9.68666	9.36064	8.89119	8.5206	10.5068	9.80511	9.75855	9.53718	9.08029	10.525	10.174	10.0364	10.0944	9.73044	10.4225	10.5536	10.391	10.4039	9.85103
PCA_1-044	10.171	9.68877	9.24986	8.97597	8.34587	10.2543	9.76025	9.38333	8.81556	8.27975	10.419	9.721	9.23917	8.99242	8.50174	10.4475	9.93671	9.6584	9.62487	9.07844	10.4184	10.166	10.1199	10.0079	9.62926	10.466	10.426	10.2408	10.2728	9.74719
PCA_1-045	10.3038	9.69368	9.31087	8.93883	8.54718	10.1705	9.67263	9.22491	8.92318	8.29542	10.4045	9.73736	9.29585	8.94223	8.42031	10.4004	9.78816	9.72601	9.56949	9.18284	10.3846	9.98531	10.0047	10.0442	9.61592	10.3962	10.2764	10.2109	10.1185	9.79081
PCA_1-046	10.1472	9.54692	9.36477	8.96143	8.4109	10.297	9.53597	9.31832	8.88672	8.35478	10.306	9.70203	9.27201	8.92819	8.52244	10.3502	9.97074	9.66977	9.54134	9.14279	10.4206	10.0757	10.126	9.85284	9.61505	10.4569	10.24	10.3784	10.2177	9.68387
PCA_1-047	10.2644	9.55728	9.22052	8.9387	8.50627	10.2408	9.68567	9.2606	8.94498	8.35527	10.2607	9.64823	9.21345	9.01571	8.45568	10.4178	9.87846	9.58629	9.43994	9.08554	10.475	10.0398	9.95428	9.99776	9.59755	10.3401	10.2649	10.1737	10.1581	9.7069
PCA_1-048	10.1865	9.60333	9.25851	8.76714	8.57452	10.3359	9.638	9.19547	8.93282	8.37921	10.3248	9.58865	9.28576	8.98287	8.4241	10.2053	9.84923	9.60552	9.38773	9.01055	10.3496	10.0678	10.1245	9.92864	9.64753	10.2243	10.2073	10.1246	10.1364	9.72328
PCA_1-049	10.1549	9.60944	9.30968	8.87666	8.62785	10.3604	9.68437	9.31135	8.98411	8.38732	10.3632	9.44097	9.33483	8.96836	8.43343	10.195	9.76612	9.68249	9.47328	9.01633	10.2005	10.1519	10.0058	10.0012	9.66854	10.235	10.3112	10.1373	10.139	9.73737
PCA_1-050	10.1573	9.57546	9.32128	8.92731	8.59452	10.2495	9.4894	9.28567	8.78718	8.39446	10.4047	9.5905	9.24956	8.96063	8.52693	10.2293	9.72214	9.68412	9.42171	9.07051	10.4363	9.96376	9.94693	10.0106	9.60321	10.2435	10.3329	10.1661	10.1732	9.74277
PCA_1-051	10.2327	9.63864	9.38529	8.83531	8.45421	10.2653	9.65374	9.28733	8.83396	8.34894	10.2256	9.55786	9.31093	8.91316	8.52331	10.3295	9.85564	9.70527	9.44035	9.03168	10.3535	10.0556	9.91119	9.95362	9.70275	10.2846	10.1309	9.98847	10.1175	9.69451
PCA_1-052	10.2167	9.51384	9.28736	8.82154	8.52476	10.2322	9.51683	9.26303	8.89374	8.3524	10.2382	9.66451	9.28383	8.8492	8.50113	10.1249	9.78367	9.65098	9.51873	8.91468	10.1699	10.1188	10.0492	10.0942	9.68756	10.3083	10.2035	10.1459	10.2191	9.70903
PCA_1-053	10.2261	9.57273	9.35724	8.99317	8.64518	10.1985	9.57837	9.27339	8.85228	8.41003	10.2259	9.66547	9.27798	8.95085	8.57558	10.1291	9.73645	9.53407	9.54145	8.97985	10.1407	10.0854	10.0763	9.83247	9.64752	10.2659	10.2112	10.2515	10.21	9.65574
PCA_1-054	10.1765	9.67771	9.25925	8.95665	8.46659	10.2711	9.62629	9.29661	8.82721	8.33342	10.2088	9.67825	9.22372	8.9316	8.55972	10.2091	9.80566	9.48829	9.45123	8.94645	10.1483	10.0675	10.0322	9.88677	9.59616	10.0641	10.1487	10.2419	10.2149	9.65017
PCA_1-055	10.1305	9.67547	9.13947	8.96962	8.56433	10.2933	9.70766	9.28643	8.89851	8.36872	10.2931	9.61481	9.25334	8.88481	8.45455	10.1788	9.92839	9.58725	9.45139	8.90948	10.1754	10.1241	10.0458	9.9492	9.61405	10.2833	10.172	10.1943	10.1639	9.59374
PCA_1-056	10.1507	9.64891	9.23548	8.82719	8.58404	10.2002	9.74012	9.27876	8.83621	8.44307	10.2805	9.63998	9.32678	8.87191	8.62332	10.166	9.73665	9.59226	9.47682	8.90994	10.0426	10.0917	9.89641	9.95359	9.52629	10.1994	10.2681	10.1857	10.1703	9.67619
PCA_1-057	10.2445	9.55208	9.27219	8.95433	8.62248	10.3297	9.54146	9.24931	8.81638	8.48356	10.2581	9.60297	9.2892	8.94532	8.49323	10.0707	9.76671	9.69779	9.45692	8.90942	10.1234	10.0979	10.0437	9.9966	9.46103	10.1392	10.2291	10.0325	10.2482	9.53539
PCA_1-058	10.1802	9.54296	9.23052	8.92972	8.55155	10.2861	9.45216	9.30461	8.88027	8.39301	10.2442	9.75234	9.4544	8.94697	8.49696	10.1424	9.91068	9.63373	9.43844	8.92311	10.2061	9.99049	10.0401	10.0172	9.60255	10.1086	10.2832	10.0468	10.1415	9.66707
PCA_1-059	10.2207	9.55989	9.3155	8.91674	8.47035	10.3412	9.5212	9.33502	8.82962	8.45724	10.1674	9.56053	9.36774	8.88936	8.65404	10.1138	9.78071	9.522	9.45633	8.92294	10.2115	9.98291	10.0642	10.145	9.47639	10.0237	10.2833	10.1796	10.2856	9.70227
PCA_1-060	10.1841	9.5878	9.36156	8.95742	8.42098	10.1352	9.76968	9.31219	8.87351	8.4118	10.1405	9.6103	9.37166	8.86166	8.71922	10.1743	9.75304	9.54813	9.4673	8.96899	10.1475	10.1687	10.0032	9.99397	9.54548	10.1838	10.0713	10.121	10.2535	9.74856
PCA_1-061	10.0391	9.69794	9.25473	8.94966	8.30531	10.2418	9.57019	9.32413	9.00348	8.25603	10.1798	9.62032	9.4241	9.07574	8.50749	10.2526	9.81842	9.66908	9.43338	8.93475	10.2083	10.0538	10.1363	10.0396	9.53774	10.2346	10.2095	10.286	10.2046	9.66077
PCA_1-062	10.0797	9.71759	9.31395	9.03506	8.25692	10.2085	9.6128	9.33915	8.83674	8.32805	10.1097	9.64601	9.38051	8.91783	8.47515	10.0762	9.83008	9.80528	9.41542	8.8732	10.2812	10.0712	10.0757	10.0545	9.47307	10.264	10.0791	10.21	10.0985	9.71668
PCA_1-063	10.0113	9.65212	9.26868	8.91761	8.40068	9.95685	9.56533	9.37087	8.90077	8.31992	10.1503	9.75879	9.2966	9.00808	8.56036	10.2115	9.78145	9.61463	9.50347	8.90892	10.1127	10.0817	9.96046	10.0793	9.37373	10.2267	10.1932	10.2176	10.1951	9.78064
PCA_1-064	10.051	9.61973	9.32863	8.93559	8.32925	10.0871	9.70614	9.33644	9.06168	8.26017	10.0063	9.53363	9.41728	8.94976	8.5552	10.1395	9.86946	9.7867	9.42303	9.09258	10.1521	10.0981	10.0605	10.005	9.55021	10.2413	10.2038	10.2288	10.3564	9.65422
PCA_1-065	10.0463	9.61071	9.20284	9.07647	8.43304	10.0165	9.57161	9.24949	8.97955	8.36217	10.2436	9.60293	9.43528	9.14077	8.46319	10.1448	9.74236	9.59441	9.42257	8.77072	10.118	10.1347	10.0724	10.0235	9.38826	10.2856	10.2748	10.2491	10.1838	9.67915
PCA_1-066	9.99271	9.60333	9.27057	8.95113	8.5168	10.1181	9.67149	9.2981	8.95809	8.2753	10.1183	9.58207	9.46677	9.02279	8.47903	10.0743	9.76276	9.72636	9.40114	8.94218	10.164	10.1062	9.94686	9.9948	9.46658	10.2763	10.2095	10.2329	10.0741	9.7183
PCA_1-067	10.1528	9.59324	9.27994	9.14102	8.34838	10.0984	9.70019	9.33955	8.91428	8.35028	10.1599	9.77466	9.4969	9.14236	8.61232	10.1014	9.80015	9.6138	9.39422	8.98275	10.0944	10.0794	10.0089	9.96166	9.49687	10.3164	10.235	10.3119	10.1844	9.67522
PCA_1-068	10.0695	9.60269	9.2081	8.92001	8.66389	10.147	9.63425	9.24739	8.99041	8.31926	10.2381	9.63754	9.42506	9.08252	8.53944	10.0877	9.83603	9.6921	9.50749	8.97258	10.2366	9.97788	9.97941	9.84534	9.46589	10.2501	10.3591	10.1623	10.1981	9.72453
PCA_1-069	10.0598	9.63557	9.3149	8.92052	8.39841	10.1592	9.65113	9.2868	8.98692	8.45717	10.2247	9.73449	9.50275	9.05867	8.47782	10.0934	9.71674	9.61067	9.51885	8.93607	10.2165	10.0213	9.81839	9.88329	9.3424	10.2682	10.2506	10.1654	10.2992	9.67696
PCA_1-070	10.1397	9.61695	9.39141	8.90989	8.53261	10.1569	9.65202	9.36494	8.91807	8.49077	9.97318	9.77277	9.33875	9.05976	8.57571	10.1494	9.75748	9.82774	9.53501	9.02028	10.1855	9.96294	10.0209	9.93244	9.36811	10.2342	10.2084	10.435	9.97087	9.75944
PCA_1-071	9.94441	9.74518	9.45176	9.07236	8.54026	10.1592	9.52326	9.35172	9.03764	8.33317	10.1403	9.63246	9.45947	9.08872	8.53974	10.2166	9.7787	9.65692	9.43182	9.0283	10.0907	9.92598	9.97736	9.90232	9.28746	10.3164	10.2848	10.255	10.1612	9.58491
PCA_1-072	10.0148	9.67034	9.28805	9.02778	8.46719	10.1221	9.6806	9.49804	9.05595	8.34593	10.2161	9.61216	9.48863	9.08038	8.57569	10.1984	9.69697	9.67028	9.29765	8.8995	10.1687	10.0049	10.012	9.76546	9.50101	10.2458	10.27	10.1861	10.1509	9.75624
PCA_1-073	10.0609	9.81148	9.29119	9.11314	8.42775	10.1542	9.75996	9.41256	9.11333	8.37958	10.2121	9.65446	9.4802	9.12685	8.4822	10.0522	9.78412	9.67946	9.50805	9.02423	10.1932	10.0144	10.0053	9.91052	9.43555	10.2652	10.3553	10.2409	10.1669	9.62917
PCA_1-074	10.0121	9.84995	9.30577	9.15399	8.67856	10.0282	9.81321	9.25884	9.05505	8.39819	10.1293	9.70291	9.49881	9.02564	8.55687	10.3032	9.73649	9.61447	9.53107	8.94906	10.5019	9.99008	10.1078	9.79472	9.63366	10.2996	10.2535	10.2569	10.236	9.66335
PCA_1-075	10.1384	9.61106	9.37644	9.06575	8.80888	10.0419	9.81687	9.20746	8.93477	8.30139	10.1546	9.6428	9.45481	9.10603	8.34511	10.2562	9.86424	9.68518	9.57663	8.95595	10.1856	9.99103	10.013	9.96955	9.59564	10.294	10.3643	10.3322	10.1532	9.62038
PCA_1-076	10.1439	9.86581	9.33741	9.07488	8.733	10.2401	9.8124	9.2798	8.97083	8.42153	10.2849	9.6323	9.46703	9.10164	8.49754	10.237	9.75748	9.7153	9.51985	8.94156	10.2745	9.90448	9.95524	9.75427	9.62487	10.2424	10.165	10.3874	10.254	9.65592
PCA_1-077	10.0782	9.6879	9.3975	9.06546	8.55343	10.1671	9.89598	9.15591	9.11575	8.45624	10.3365	9.64033	9.33112	9.19779	8.5491	10.3233	9.79703	9.7745	9.51965	9.0877	10.2508	10.0565	10.0682	9.79221	9.62282	10.2417	10.1206	10.3309	10.2569	9.70194
PCA_1-078	10.2646	9.77955	9.35845	9.02674	8.83529	10.2286	9.86269	9.27684	9.09265	8.39932	10.2787	9.78872	9.32396	9.17195	8.43447	10.2257	9.76963	9.61889	9.41132	8.95578	10.3036	9.8771	10.0623	9.89522	9.51031	10.3895	10.2571	10.3154	10.1706	9.67436
PCA_1-079	10.1393	9.79212	9.40401	9.20807	8.80746	10.2437	9.81578	9.32404	9.19368	8.505	10.2455	9.6954	9.51049	9.33234	8.50404	10.1612	9.69497	9.67408	9.44888	8.88003	10.1074	10.0367	9.99753	9.86647	9.41853	10.337	9.99868	10.245	10.3009	9.63078
PCA_1-080	9.99619	9.78082	9.34794	9.10635	8.82533	10.2135	9.7685	9.31926	9.09606	8.50607	10.3033	9.7765	9.48043	9.21462	8.55511	10.2987	9.80523	9.88522	9.49335	8.8911	10.1383	9.91839	10.1434	9.7683	9.4506	10.3049	10.2259	10.2916	10.0918	9.58433
PCA_1-081	10.015	9.8357	9.28149	9.26372	8.65067	10.1899	9.74885	9.45405	9.11097	8.43402	10.1862	9.69077	9.4548	9.1608	8.45655	10.2173	9.62537	9.65834	9.52229	9.04638	10.3442	10.141	9.99543	9.90621	9.49488	10.2504	10.1899	10.0973	10.3037	9.70746
PCA_1-082	10.15	9.90069	9.34322	9.08047	8.82698	10.1656	9.77143	9.37874	9.04372	8.4799	10.1506	9.8189	9.55286	9.26505	8.49148	10.2443	9.83535	9.7999	9.48967	9.01849	10.2974	10.0006	9.89201	9.90764	9.29707	10.3756	10.195	10.3476	10.2135	9.59701
PCA_1-083	10.1936	9.8003	9.49535	9.34457	8.78594	10.1823	9.81543	9.37446	9.15991	8.57777	10.0903	9.84522	9.3686	9.08066	8.56428	10.2607	9.69774	9.73527	9.48944	9.02545	10.2885	10.0223	10.0914	9.99153	9.53352	10.4073	10.3101	10.224	10.2831	9.66754
PCA_1-084	10.4102	9.83702	9.3903	9.13543	8.8445	10.2033	9.84567	9.50495	9.11703	8.50972	10.0772	9.73623	9.55666	9.26634	8.5876	10.2543	9.79121	9.91412	9.65594	9.07021	10.1342	9.95591	9.92417	9.88861	9.50876	10.3342	10.1718	10.1983	10.2791	9.70042
PCA_1-085	10.2427	9.76793	9.37802	9.29096	8.66336	10.1602	9.87028	9.48063	9.10781	8.59454	10.3041	9.89393	9.60592	9.1778	8.58708	10.4016	9.74527	9.80448	9.51672	8.98284	10.1978	10.1626	9.99704	9.89666	9.57616	10.2063	10.3052	10.2665	10.0957	9.6153
PCA_1-086	10.2465	9.88943	9.30599	9.20153	9.10094	10.2276	9.70541	9.51492	9.20789	8.45589	10.3695	9.84035	9.63163	9.2234	8.52768	10.1206	9.77269	9.78267	9.58107	8.98324	10.1998	10.0318	10.1107	9.79339	9.28376	10.3145	10.1091	10.3101	10.3581	9.61251
PCA_1-087	10.0687	9.75837	9.43613	9.02491	8.86696	10.2604	9.80398	9.41572	9.18094	8.56927	10.2368	9.90298	9.4845	9.21998	8.63774	10.4	9.71195	9.83344	9.60264	9.0244	10.3443	10.0504	10.0968	9.95234	9.46925	10.2992	10.2284	10.3983	10.2584	9.66482
PCA_1-088	10.193	9.92485	9.38062	9.12277	8.86217	10.2936	9.74205	9.44803	9.18701	8.54113	10.3914	9.81305	9.53282	9.12271	8.57649	10.4013	9.87462	9.72615	9.64306	9.10558	10.2453	10.0461	10.0352	9.95768	9.45622	10.3953	10.3177	10.3223	10.2505	9.56589
PCA_1-089	10.1766	9.94269	9.42363	9.17674	8.69173	10.3453	9.69197	9.47489	9.09936	8.64743	10.2586	9.68111	9.63464	9.27208	8.65027	10.1852	9.74238	9.83831	9.79732	9.00642	10.4817	10.1512	9.98843	9.97603	9.36169	10.4496	10.2239	10.2773	10.2103	9.63348
PCA_1-090	10.2326	9.87307	9.44346	9.19412	8.93726	10.3084	9.85117	9.42203	9.05283	8.68673	10.4077	9.64558	9.55795	9.38496	8.6547	10.3274	9.81417	9.93255	9.53486	9.07936	10.4167	10.0059	9.87994	10.0651	9.42595	10.3516	10.1459	10.1688	10.3092	9.63978
PCA_1-091	10.318	9.92109	9.49038	9.24036	8.99105	10.1756	9.66577	9.38725	9.03631	8.56527	10.2011	9.79028	9.61079	9.32246	8.67702	10.1743	9.66487	9.83434	9.67886	9.16298	10.3799	10.2175	9.9234	9.98256	9.43443	10.3164	10.2424	10.3417	10.2011	9.76728
PCA_1-092	10.4432	9.84947	9.39253	9.18076	9.25528	10.4043	9.85472	9.46925	9.32754	8.61234	10.441	9.76295	9.63292	9.2511	8.60926	10.2257	9.93284	9.93773	9.71025	9.19046	10.432	9.94374	9.88502	10.0442	9.31522	10.3044	10.3505	10.2936	10.2507	9.51761
PCA_1-093	10.5213	9.95432	9.50605	9.25068	8.94718	10.3743	9.76639	9.51952	9.27885	8.56257	10.3377	9.87485	9.58356	9.31537	8.72829	10.0971	9.77074	9.8088	9.6154	8.99239	10.3546	10.0801	10.0513	10.0322	9.43766	10.425	10.2857	10.0638	10.0682	9.56981
PCA_1-094	10.2842	9.92461	9.45733	9.13991	8.9728	10.4446	9.79169	9.61872	9.15232	8.53777	10.3878	9.64504	9.44469	9.31452	8.78918	10.3707	9.82637	9.95934	9.70704	9.06027	10.3503	10.0101	10.0457	9.93592	9.42018	10.6274	10.2604	10.1724	9.96841	9.7151
PCA_1-095	10.3513	9.96403	9.58968	9.33273	9.2284	10.3431	9.76563	9.57008	9.1423	8.62458	10.2501	9.74582	9.66595	9.28056	8.68214	10.1454	9.80909	9.79887	9.67255	8.98052	10.295	10.1099	10.1059	10.1469	9.50167	10.5121	10.593	10.1761	10.2397	9.61645
PCA_1-096	10.3097	9.75066	9.61267	9.13696	9.15238	10.3804	10.0479	9.46384	9.24749	8.59441	10.2118	9.78987	9.74585	9.18405	8.88658	10.2953	9.79488	9.7717	9.56637	9.06849	10.3705	9.97739	10.0962	10.0025	9.46645	10.4317	10.2266	10.2005	10.0098	9.57037
PCA_1-097	10.2503	9.77512	9.55523	9.19269	9.11362	10.4058	9.69112	9.57418	9.3843	8.93398	10.3597	9.82218	9.48772	9.31113	8.67868	10.1423	9.92357	9.95484	9.64279	9.08048	10.3636	10.0202	9.93925	10.0548	9.39965	10.3853	10.3051	10.1108	9.97331	9.67674
PCA_1-098	10.2856	9.99299	9.59298	9.07052	9.27319	10.267	9.94425	9.53546	9.21896	8.75642	10.3261	9.84446	9.48776	9.14197	8.71694	10.4664	9.82097	9.8917	9.76568	9.028	10.3949	9.95621	9.88733	9.75523	9.33721	10.4798	10.118	10.0506	10.1821	9.54938
PCA_1-099	10.3996	9.89256	9.50144	9.25124	9.19781	10.3044	9.88515	9.44684	9.13107	8.86194	10.4795	9.89296	9.63184	9.19313	8.69868	10.3671	9.98548	9.92489	9.91749	9.18701	10.3323	9.94434	10.0961	9.88073	9.51708	10.2553	10.2257	10.1477	10.2021	9.62006
PCA_1-100	10.2838	9.89448	9.4738	9.19672	9.11926	10.4212	9.9519	9.67255	9.29788	8.73263	10.2958	9.99229	9.60149	9.19283	8.79657	10.2932	9.89281	9.79695	9.75354	9.09506	10.2799	10.0587	10.0455	9.7571	9.46847	10.4033	10.2691	10.1686	10.1158	9.43211

## Sheet: lambda_0.0046416
Row	kernel_0mm_parcels_100	kernel_0mm_parcels_200	kernel_0mm_parcels_400	kernel_0mm_parcels_1000	kernel_0mm_vertex	kernel_5mm_parcels_100	kernel_5mm_parcels_200	kernel_5mm_parcels_400	kernel_5mm_parcels_1000	kernel_5mm_vertex	kernel_10mm_parcels_100	kernel_10mm_parcels_200	kernel_10mm_parcels_400	kernel_10mm_parcels_1000	kernel_10mm_vertex	kernel_20mm_parcels_100	kernel_20mm_parcels_200	kernel_20mm_parcels_400	kernel_20mm_parcels_1000	kernel_20mm_vertex	kernel_30mm_parcels_100	kernel_30mm_parcels_200	kernel_30mm_parcels_400	kernel_30mm_parcels_1000	kernel_30mm_vertex	kernel_40mm_parcels_100	kernel_40mm_parcels_200	kernel_40mm_parcels_400	kernel_40mm_parcels_1000	kernel_40mm_vertex
PCA_1-001	12.2039	12.1413	12.1203	12.054	11.6099	12.2978	12.1989	12.2232	12.1642	11.9	12.3314	12.251	12.263	12.2383	12.1099	12.3232	12.261	12.2781	12.3063	12.1819	12.2866	12.2107	12.2562	12.2954	12.2051	12.2615	12.1912	12.2093	12.2668	12.1662
PCA_1-002	12.2335	12.1471	12.0886	12.0587	10.8168	12.3377	12.2145	12.1961	12.171	11.0245	12.3356	12.2731	12.2473	12.2738	11.5953	12.3027	12.2729	12.2779	12.3464	12.1273	12.2788	12.2433	12.253	12.309	12.1741	12.2486	12.2384	12.2274	12.3134	12.1709
PCA_1-003	11.8559	11.4059	10.9657	10.5763	10.8587	11.8259	11.4047	11.0519	10.5687	10.8581	11.7658	11.4491	11.1811	10.7216	10.9154	11.8212	11.5769	11.3422	11.0911	11.3311	11.8516	11.5943	11.4569	11.2864	11.4508	11.7784	11.6403	11.5388	11.4531	11.5088
PCA_1-004	10.9949	10.814	10.8911	10.5267	9.70889	11.1049	10.9771	10.9677	10.5542	9.77918	11.1627	11.0615	11.0554	10.7348	10.0246	11.2865	11.2795	11.255	11.0676	10.8484	11.3054	11.3111	11.2949	11.2162	10.904	11.344	11.3882	11.2677	11.2277	11.0126
PCA_1-005	11.0422	10.7281	10.6575	10.1196	9.08329	11.1453	10.9143	10.7863	10.2277	9.39685	11.1898	10.976	10.939	10.5995	9.90397	11.265	11.1249	11.1871	11.0261	10.8452	11.2216	11.2233	11.2423	11.127	10.9431	11.1913	11.2063	11.21	11.1689	10.9642
PCA_1-006	11.007	10.6208	10.416	9.338	8.90169	11.0894	10.7395	10.5751	9.59241	9.38554	11.1127	10.9049	10.7848	10.4696	9.84368	11.1577	11.1476	11.1714	11.0297	10.8324	11.196	11.1948	11.1926	11.1777	10.9327	11.1574	11.164	11.2316	11.1713	10.9749
PCA_1-007	10.8185	10.4078	9.96749	9.3586	8.70205	10.8929	10.6987	9.98438	9.35759	8.7338	11.0211	10.9495	10.7566	9.89964	8.79217	11.1695	11.1848	11.1731	11.0116	10.4441	11.2049	11.2139	11.2365	11.1865	10.813	11.1254	11.2101	11.216	11.1899	10.9857
PCA_1-008	10.8349	10.1914	9.90622	9.28756	8.75406	10.8722	10.3512	9.95324	9.36815	8.68687	11.0139	10.7274	10.282	9.68352	8.83727	11.1767	11.0997	11.0026	10.8332	10.4194	11.1776	11.1181	11.1186	11.0255	10.7576	11.2205	11.2101	11.262	11.2098	10.7757
PCA_1-009	10.892	10.1613	9.89018	9.32242	8.80686	10.9503	10.2883	9.97964	9.38903	8.74292	11.0142	10.4962	10.182	9.66294	8.79049	11.1204	10.9901	10.6989	10.5038	9.95423	11.2252	11.1245	11.0871	10.9933	10.6671	11.1595	11.1894	11.1946	11.0807	10.8026
PCA_1-010	10.6832	9.99158	9.58406	9.33634	8.79287	10.734	10.0215	9.64207	9.30892	8.71207	10.8834	10.1093	9.82598	9.43348	8.73429	11.0034	10.5463	10.2144	10.0773	9.70349	11.22	11.1123	10.5546	10.4728	10.2241	11.178	11.1722	10.7876	10.8136	10.7484
PCA_1-011	10.5165	9.94416	9.5777	9.30808	8.77637	10.8177	9.95799	9.67416	9.34442	8.67952	10.7831	10.0854	9.75904	9.52091	8.73549	10.6795	10.4438	10.1972	9.97255	9.69534	10.7304	11.028	10.4876	10.436	10.1626	11.1106	11.1882	10.6848	10.6618	10.382
PCA_1-012	10.5849	9.93294	9.65113	9.39913	8.78852	10.6496	10.0117	9.68687	9.41287	8.66835	10.7009	10.1217	9.78459	9.47476	8.75253	10.6772	10.3461	10.2129	10.0089	9.67791	10.7119	10.5316	10.5234	10.3925	10.1803	10.7358	10.7438	10.5971	10.5765	10.3428
PCA_1-013	10.515	9.94759	9.57906	9.30266	8.60746	10.704	10.0611	9.64595	9.39615	8.43227	10.7217	10.0751	9.7642	9.49243	8.70915	10.6861	10.2693	10.1825	9.93906	9.69644	10.6858	10.5971	10.4609	10.3701	10.2239	10.7288	10.6858	10.6578	10.5912	10.3503
PCA_1-014	10.6025	9.79043	9.5449	9.05373	8.55261	10.6746	9.87729	9.60232	9.31485	8.45635	10.7793	10.0033	9.77248	9.44347	8.70246	10.6529	10.1687	10.0611	9.93101	9.66214	10.618	10.4582	10.3691	10.2078	10.2042	10.6042	10.7211	10.4557	10.2986	10.3782
PCA_1-015	10.5607	9.87065	9.51821	9.08509	8.46321	10.6361	9.84442	9.61543	9.24688	8.45125	10.7534	10.0292	9.77879	9.45367	8.61722	10.6934	10.2076	10.09	9.86187	9.68649	10.6282	10.3911	10.2974	10.1631	10.2057	10.7296	10.5051	10.508	10.3746	10.3257
PCA_1-016	10.4022	9.84421	9.27666	8.9143	8.37489	10.4658	9.90297	9.46706	8.96542	8.38242	10.4944	9.99227	9.82075	9.37315	8.60156	10.6372	10.2108	10.0927	9.90939	9.61336	10.6846	10.3782	10.3248	10.2308	10.1095	10.6367	10.4767	10.518	10.3249	10.3797
PCA_1-017	10.3957	9.84951	9.27866	8.8559	8.36521	10.4405	9.84454	9.38831	8.8937	8.39666	10.5386	10.148	9.76731	9.28496	8.60022	10.5775	10.1956	10.13	9.89578	9.51458	10.6977	10.4438	10.2735	10.2766	10.141	10.6721	10.4896	10.4504	10.3681	10.3053
PCA_1-018	10.3627	9.85186	9.31549	8.92343	8.33266	10.4515	9.92227	9.40298	8.91293	8.38394	10.4933	9.96924	9.72148	9.27602	8.55495	10.6702	10.3379	10.1257	9.94818	9.56657	10.6471	10.4582	10.2871	10.2335	10.1645	10.6901	10.4331	10.4179	10.3709	10.283
PCA_1-019	10.4113	9.79627	9.23979	8.80405	8.3598	10.4685	9.88972	9.35834	8.92506	8.43424	10.4848	10.0166	9.71172	9.20778	8.55299	10.6087	10.1826	10.0881	9.92575	9.30761	10.5978	10.4495	10.351	10.2536	10.1039	10.6649	10.5244	10.3789	10.431	10.2652
PCA_1-020	10.366	9.76116	9.24334	8.83768	8.27907	10.5266	9.92528	9.34869	8.90385	8.41041	10.5802	10.0166	9.57164	9.33712	8.53813	10.5757	10.2112	10.1164	9.90617	9.30523	10.5603	10.377	10.2423	10.2634	10.1984	10.5714	10.4923	10.3654	10.3435	10.1882
PCA_1-021	10.2305	9.75214	9.19258	8.91009	8.2604	10.4895	9.82272	9.35364	8.92963	8.33144	10.6002	10.0302	9.59052	9.24393	8.58285	10.532	10.1923	10.0302	9.96139	9.30571	10.6146	10.2997	10.2503	10.2239	10.1614	10.6313	10.4445	10.3749	10.4554	10.2502
PCA_1-022	10.2644	9.69981	9.26952	8.86642	8.28015	10.47	9.74545	9.31117	8.85705	8.3645	10.5056	9.95865	9.43366	9.11721	8.62908	10.5681	10.1822	10.1195	9.96911	9.27133	10.5413	10.373	10.2926	10.3165	9.94274	10.6676	10.4478	10.4039	10.3973	10.1054
PCA_1-023	10.2736	9.77482	9.22316	8.89622	8.27788	10.426	9.88126	9.33981	8.88526	8.35355	10.4969	9.9239	9.47478	9.06043	8.59975	10.5974	10.1229	9.9677	10.0113	9.39425	10.4912	10.3268	10.3367	10.3272	9.9488	10.5169	10.5147	10.3812	10.3756	10.1929
PCA_1-024	10.1393	9.73787	9.2295	8.85378	8.33639	10.2867	9.89257	9.46835	8.91735	8.36576	10.5714	9.84495	9.56103	9.10046	8.62068	10.6019	10.1786	9.90673	9.79559	9.25814	10.5491	10.2937	10.2926	10.2503	9.98047	10.5889	10.5207	10.4146	10.3521	10.1818
PCA_1-025	10.1126	9.73589	9.24721	8.88384	8.35805	10.4088	9.76304	9.3723	8.73829	8.35461	10.4227	9.82405	9.50914	9.07381	8.55983	10.5665	10.1746	10.0157	9.81736	9.31133	10.607	10.4465	10.2241	10.1782	9.8233	10.5941	10.5351	10.3317	10.3986	10.1261
PCA_1-026	10.2371	9.61101	9.23239	8.73953	8.25477	10.2913	9.73733	9.28822	8.81116	8.4292	10.3549	9.95114	9.51238	8.96336	8.57419	10.5694	10.2589	9.98773	9.78674	9.24412	10.5648	10.5024	10.1702	10.218	9.86086	10.5256	10.5243	10.4233	10.4004	10.1773
PCA_1-027	10.1345	9.56453	9.13106	8.77873	8.26214	10.2721	9.66651	9.33245	8.82421	8.41271	10.4004	9.98184	9.52705	9.02486	8.58413	10.4689	10.2308	9.86697	9.78838	9.36107	10.5836	10.3533	10.2662	10.214	9.79221	10.5393	10.5399	10.3682	10.4783	10.222
PCA_1-028	10.1862	9.67445	9.15692	8.82581	8.41552	10.2398	9.70446	9.3091	8.86692	8.45642	10.4186	9.68831	9.5996	8.90758	8.579	10.5201	10.1467	9.96298	9.72408	9.26748	10.5751	10.3364	10.1219	10.1655	9.69232	10.512	10.4517	10.4428	10.4495	10.2473
PCA_1-029	10.1676	9.58921	9.15042	8.79373	8.33158	10.1048	9.71477	9.4413	8.87711	8.50572	10.2238	9.75307	9.49834	9.02286	8.59608	10.4715	10.2349	9.97489	9.62462	9.25492	10.479	10.4283	10.2856	10.197	9.77744	10.6027	10.4753	10.4408	10.4173	10.1033
PCA_1-030	10.0767	9.57399	9.28113	8.87472	8.29288	10.231	9.44524	9.22321	8.88081	8.3785	10.3246	9.73192	9.53161	9.03636	8.61893	10.4087	10.1648	9.97955	9.62833	9.24426	10.5439	10.3871	10.2226	10.2145	9.77951	10.5071	10.5038	10.3909	10.3281	10.1173
PCA_1-031	10.0964	9.56326	9.20176	8.816	8.31327	10.2006	9.55904	9.20778	8.7955	8.46067	10.1412	9.70197	9.43017	9.08456	8.59314	10.365	10.1832	9.92724	9.6018	9.23764	10.5581	10.5186	10.2106	10.1156	9.76584	10.5529	10.4931	10.4021	10.3092	10.0502
PCA_1-032	10.0161	9.42693	9.19409	8.79148	8.28002	10.0923	9.5811	9.27352	8.82649	8.37114	10.2401	9.78229	9.38862	9.03133	8.5327	10.2654	10.1561	9.98926	9.56743	9.30992	10.5147	10.4147	10.1722	10.1706	9.7405	10.5493	10.4798	10.4539	10.311	10.1144
PCA_1-033	10.0968	9.54635	9.15287	8.86189	8.26903	10.2465	9.57144	9.27462	8.7982	8.37013	10.2872	9.71058	9.42612	8.90351	8.58743	10.3545	10.0864	10.0676	9.63994	9.12511	10.4094	10.4443	10.1986	10.0763	9.73743	10.5859	10.563	10.4609	10.2582	10.1075
PCA_1-034	10.1649	9.56721	9.16385	8.85651	8.2832	10.1098	9.59078	9.36082	8.8096	8.3808	10.1226	9.68642	9.51001	8.93644	8.55205	10.3072	10.1293	10.0012	9.65871	9.12592	10.43	10.351	10.3077	10.1545	9.75131	10.5459	10.5696	10.2857	10.2932	10.0705
PCA_1-035	10.1014	9.53316	9.16963	8.91017	8.25028	10.0708	9.68831	9.26248	8.78555	8.29588	10.1959	9.72587	9.33268	8.88412	8.58285	10.3807	10.157	9.94535	9.75871	9.19337	10.436	10.4123	10.149	10.0338	9.7089	10.4746	10.5538	10.387	10.383	9.85929
PCA_1-036	10.0641	9.55991	9.25804	8.85255	8.34933	10.18	9.58211	9.1606	8.81512	8.33794	10.3521	9.72505	9.33299	8.98319	8.33382	10.4702	10.0158	9.84871	9.70047	9.17919	10.3798	10.3016	10.2857	10.1159	9.65162	10.4473	10.4366	10.332	10.3409	9.89799
PCA_1-037	10.0849	9.54121	9.18273	8.88626	8.31868	10.2073	9.6561	9.1418	8.83343	8.44005	10.2776	9.61554	9.2917	9.07375	8.59747	10.454	10.1106	9.74049	9.6533	9.18758	10.5025	10.3275	10.2011	10.0417	9.62815	10.3703	10.4798	10.4069	10.3739	9.81901
PCA_1-038	10.2438	9.47308	9.18514	8.86589	8.31847	10.0378	9.53097	9.14542	8.93726	8.41834	10.3041	9.68084	9.22214	9.0167	8.48627	10.3988	9.79544	9.83431	9.54742	9.11086	10.4902	10.3222	10.1397	10.1374	9.68386	10.4101	10.4948	10.4728	10.4036	9.81446
PCA_1-039	10.1302	9.551	9.12149	8.91113	8.4186	10.1503	9.60844	9.20034	8.8686	8.51924	10.3685	9.66283	9.19521	9.04991	8.54892	10.3963	9.91067	9.77027	9.55321	9.20103	10.3831	10.3608	10.3029	10.087	9.70613	10.3974	10.407	10.477	10.2999	9.70682
PCA_1-040	10.1545	9.67284	9.18018	8.91361	8.18889	10.1412	9.71805	9.24626	8.82329	8.21709	10.2886	9.64946	9.27878	9.00059	8.50899	10.4294	9.86826	9.70318	9.50056	9.29694	10.456	10.2393	10.1631	10.1626	9.71061	10.4077	10.4522	10.3469	10.4817	9.76363
PCA_1-041	10.2255	9.66781	9.20929	8.90049	8.29201	10.2427	9.57825	9.25675	8.8559	8.30391	10.2438	9.69869	9.25646	8.89716	8.49964	10.4248	9.90256	9.69762	9.62061	9.14091	10.3477	10.2147	10.1883	10.1869	9.6836	10.4768	10.4872	10.2826	10.3899	9.76906
PCA_1-042	10.1743	9.61938	9.16533	9.00552	8.31841	10.1438	9.58675	9.25507	8.91385	8.36185	10.2977	9.72545	9.3292	8.99187	8.47451	10.434	9.92402	9.71389	9.55586	9.16077	10.4108	10.1686	10.1396	10.1304	9.68126	10.551	10.4175	10.2546	10.3604	9.72528
PCA_1-043	10.1702	9.62252	9.28961	8.84376	8.33952	10.1517	9.61377	9.19947	8.8831	8.28416	10.4006	9.62126	9.26456	8.973	8.60122	10.3169	9.82234	9.68592	9.47721	9.16771	10.3798	10.317	10.152	10.108	9.6051	10.4794	10.4528	10.305	10.3556	9.66708
PCA_1-044	10.2282	9.7831	9.32592	8.88417	8.59055	10.3762	9.57616	9.20847	8.84319	8.29915	10.3855	9.61839	9.27535	9.01667	8.47426	10.5162	9.91979	9.6711	9.51741	9.14915	10.3732	10.251	10.0954	10.0508	9.64858	10.4743	10.4403	10.4241	10.2596	9.80478
PCA_1-045	10.2774	9.60281	9.2366	8.89083	8.36955	10.3301	9.61069	9.33045	8.85043	8.24012	10.4287	9.50366	9.34701	9.0181	8.43516	10.4059	9.83617	9.77829	9.47172	9.04662	10.3962	10.0933	9.92591	9.9751	9.70082	10.4986	10.3937	10.189	10.1397	9.83672
PCA_1-046	10.1227	9.5097	9.25099	8.88809	8.55366	10.2026	9.6201	9.18681	8.802	8.35493	10.4517	9.67715	9.24046	8.91157	8.38265	10.5006	9.86116	9.59505	9.51673	8.98384	10.4152	10.0961	10.061	9.95125	9.62548	10.2736	10.1993	10.3115	10.1131	9.64355
PCA_1-047	10.1914	9.4843	9.34312	8.94171	8.55303	10.2485	9.71771	9.33553	8.87591	8.42081	10.279	9.7511	9.26241	8.99341	8.36817	10.5014	9.81419	9.65221	9.51671	9.0006	10.3441	10.0181	10.1319	10.0557	9.70854	10.34	10.2455	10.2276	10.0604	9.70413
PCA_1-048	10.1902	9.55379	9.26663	8.9474	8.53069	10.1785	9.5686	9.32418	8.92726	8.24219	10.2495	9.60148	9.255	8.96241	8.39527	10.2324	9.78602	9.69632	9.49898	9.00686	10.4323	10.1004	9.93172	9.98856	9.53824	10.2457	10.2161	10.2171	10.2123	9.6464
PCA_1-049	10.1825	9.64785	9.32461	8.87029	8.61734	10.2497	9.68671	9.21086	8.92203	8.34065	10.3376	9.60727	9.24522	8.89427	8.4678	10.4315	9.75746	9.5763	9.3887	9.05023	10.3317	10.0303	10.0096	9.97526	9.6065	10.2614	10.3379	10.0819	10.1683	9.65749
PCA_1-050	10.1825	9.52224	9.24472	8.9323	8.40193	10.3393	9.51161	9.34454	8.79992	8.36786	10.2207	9.43947	9.2183	9.02414	8.42909	10.2206	9.69649	9.76674	9.46501	9.02547	10.2143	10.121	9.9736	9.95813	9.54712	10.2497	10.2261	10.0598	10.196	9.58701
PCA_1-051	10.136	9.43691	9.34082	8.86225	8.48142	10.2392	9.70195	9.19792	8.76509	8.35559	10.3454	9.57183	9.34581	8.95014	8.34493	10.2411	9.70934	9.75993	9.51045	8.98106	10.2529	10.1733	10.0342	10.0024	9.58216	10.2393	10.123	10.0716	10.2298	9.56274
PCA_1-052	10.2065	9.59892	9.30617	8.84021	8.59627	10.2101	9.66097	9.3346	8.72649	8.33824	10.2665	9.59675	9.22378	8.93985	8.46382	10.2346	9.8603	9.75728	9.47967	8.87155	10.1949	10.0943	9.97577	10.0261	9.64923	10.2035	10.3098	10.1078	10.1902	9.56624
PCA_1-053	10.2693	9.70185	9.4121	9.04491	8.51607	10.1957	9.60947	9.2307	8.77723	8.36106	10.2298	9.62739	9.2649	9.11549	8.51348	10.1853	9.73935	9.58232	9.5944	8.91112	10.3173	10.1458	10.1406	10.1309	9.61203	10.1533	10.27	10.0933	10.1115	9.72444
PCA_1-054	10.3106	9.72536	9.35702	8.89471	8.52777	10.2217	9.57524	9.15056	8.89347	8.37411	10.1438	9.51161	9.42583	9.06158	8.52601	10.1583	9.82938	9.53756	9.39228	8.93667	10.1656	10.0383	10.039	9.95919	9.66409	10.2175	10.163	10.129	10.2484	9.75194
PCA_1-055	10.1696	9.73738	9.20154	8.88811	8.53969	10.323	9.62532	9.30707	8.94048	8.44584	10.33	9.65937	9.31029	8.92382	8.60569	10.1589	9.74505	9.60345	9.45894	8.90199	10.1807	10.0587	9.98878	9.93504	9.55504	10.2159	10.138	10.194	10.1944	9.58972
PCA_1-056	10.3717	9.58905	9.28217	8.86332	8.51858	10.3584	9.68095	9.33426	8.82305	8.36472	10.2272	9.66598	9.26176	8.90663	8.50545	10.0999	9.96047	9.71189	9.37705	8.94739	10.2595	10.0791	10.0001	10.0322	9.53705	10.2322	10.0694	10.1708	10.268	9.60452
PCA_1-057	10.1547	9.51422	9.25423	8.84831	8.66611	10.1627	9.64967	9.25104	8.81455	8.37469	10.231	9.59558	9.35461	8.94724	8.57343	10.0727	9.80462	9.63666	9.47699	9.05125	10.1393	10.1616	9.9684	10.1108	9.47779	10.0831	10.2721	10.1347	10.1366	9.55423
PCA_1-058	10.0155	9.58458	9.29309	8.96037	8.45246	10.0746	9.50336	9.29727	8.91324	8.40423	10.3389	9.60691	9.37101	8.89444	8.50841	10.0425	9.87273	9.5732	9.46049	8.95773	10.1336	10.0321	9.96399	10.1753	9.58643	10.0731	10.091	10.0569	10.349	9.66833
PCA_1-059	10.334	9.59162	9.23786	8.9936	8.5564	10.1541	9.63919	9.2824	8.73618	8.33776	10.2518	9.57209	9.33082	8.96182	8.56426	10.1896	9.73286	9.62425	9.50733	8.87345	10.2482	10.1457	10.0606	10.0396	9.60839	10.1101	10.2225	10.1615	10.0838	9.68769
PCA_1-060	10.1271	9.48007	9.24256	8.99301	8.35608	10.3134	9.57318	9.3061	8.82347	8.33481	10.2763	9.60248	9.3502	9.09462	8.53152	10.0527	9.718	9.54483	9.51308	8.85556	10.2016	10.1859	10.0859	10.0423	9.57664	10.1145	10.1702	10.095	10.2227	9.7344
PCA_1-061	10.1555	9.63358	9.42168	9.06769	8.33552	10.136	9.60472	9.30638	8.85169	8.25083	10.1868	9.63892	9.46375	8.9989	8.53746	10.1113	9.68671	9.61588	9.359	8.80115	10.2196	10.0647	10.1141	9.9904	9.50204	10.0973	10.222	10.0876	10.349	9.73338
PCA_1-062	10.1197	9.51733	9.24172	8.86753	8.36117	10.2571	9.61554	9.37715	8.8844	8.19957	10.1987	9.61847	9.34462	8.8801	8.45746	10.1147	9.94387	9.62498	9.48436	8.94041	10.1327	10.1039	10.191	10.1553	9.38088	10.162	10.1877	10.1881	10.1626	9.68459
PCA_1-063	10.1614	9.56234	9.28794	9.00773	8.35775	10.1349	9.4634	9.33348	8.96058	8.33229	10.1374	9.63048	9.41631	9.052	8.55197	10.0928	9.80875	9.62304	9.56813	8.91243	10.2112	9.97336	10.0786	9.9903	9.54278	10.1467	10.1982	10.234	10.1652	9.55093
PCA_1-064	10.0885	9.78648	9.34431	8.98396	8.50503	10.2158	9.69765	9.22001	8.7859	8.25193	10.1385	9.64061	9.42683	9.07379	8.43703	10.0873	9.92923	9.67555	9.43195	8.86226	10.2355	10.1245	10.1141	10.166	9.51358	10.095	10.1738	10.1848	10.1644	9.63972
PCA_1-065	10.1303	9.60276	9.27292	9.02628	8.44598	10.0305	9.52675	9.42611	8.93207	8.35203	10.1928	9.54548	9.45006	8.98004	8.45594	10.157	9.71021	9.73615	9.47047	8.90775	10.1636	10.0506	9.92242	10.0414	9.62573	10.2117	10.3515	10.1817	10.1505	9.77512
PCA_1-066	10.0283	9.64804	9.28942	8.9933	8.33481	10.1272	9.65581	9.27365	8.96581	8.36886	10.1347	9.55222	9.36728	8.99019	8.50381	10.3113	9.76983	9.65189	9.41124	8.85451	10.1603	10.1131	9.95739	9.98831	9.42268	10.2266	10.3051	10.1886	10.2635	9.74417
PCA_1-067	10.0261	9.62381	9.25227	9.09682	8.67002	10.136	9.57478	9.43329	8.96177	8.3634	10.1732	9.5514	9.34093	9.09435	8.57621	10.0778	9.70697	9.71407	9.45815	9.0215	10.0944	10.0639	9.98947	9.84462	9.48592	10.258	10.3428	10.0999	10.2162	9.70909
PCA_1-068	10.0974	9.68522	9.33075	8.89744	8.41028	10.0571	9.6537	9.26355	8.95103	8.41757	10.0994	9.70883	9.42195	9.08111	8.57045	10.1332	9.77389	9.66035	9.5373	9.08967	10.1535	9.98203	10.0949	9.88958	9.48103	10.3178	10.2369	10.1586	10.1466	9.67363
PCA_1-069	10.0045	9.64555	9.30012	9.04293	8.40062	10.1743	9.60363	9.3528	9.00868	8.32877	10.2147	9.62628	9.45077	9.06273	8.62908	10.119	9.6757	9.83848	9.43761	9.08404	10.2843	9.99288	9.90294	9.9988	9.33565	10.343	10.2208	10.2225	10.1645	9.71684
PCA_1-070	10.066	9.72148	9.39876	8.95875	8.54551	10.1134	9.69083	9.21249	9.07986	8.36401	10.0714	9.52083	9.31694	9.13313	8.56925	10.1649	9.81647	9.54068	9.46687	8.89697	10.2619	10.1275	9.97401	9.89864	9.38478	10.3788	10.2968	10.3023	10.1897	9.62886
PCA_1-071	10.1069	9.61517	9.49845	9.16911	8.60153	10.1588	9.6152	9.36482	8.9059	8.30919	10.0477	9.6057	9.46064	8.94122	8.6058	10.1524	9.73945	9.68319	9.3934	8.90237	10.2283	9.97037	10.0186	9.85517	9.29565	10.3601	10.3112	10.3423	10.1742	9.61314
PCA_1-072	10.0434	9.64718	9.51174	9.0454	8.50794	10.1024	9.58832	9.39052	8.99658	8.28709	10.1429	9.73563	9.5382	9.02958	8.62844	10.1116	9.7604	9.63873	9.347	9.01282	10.1214	9.81635	10.0752	9.85395	9.47858	10.2851	10.3043	10.1852	10.2324	9.67528
PCA_1-073	10.1827	9.76865	9.36135	8.99621	8.57693	10.152	9.66355	9.4431	9.04949	8.41324	10.1658	9.68732	9.52605	9.06903	8.42671	10.2457	9.74833	9.76589	9.46686	9.03302	10.232	10.0045	10.0439	10.0112	9.52592	10.3426	10.3045	10.2803	10.1786	9.7804
PCA_1-074	10.0971	9.68844	9.43514	8.95654	8.72356	10.0479	9.62773	9.2876	8.94951	8.44967	10.0749	9.6307	9.68613	8.9917	8.5116	10.1282	9.79145	9.66177	9.45893	9.04003	10.1993	9.91205	10.1257	9.7761	9.56938	10.2088	10.2696	10.4315	10.2155	9.757
PCA_1-075	9.96789	9.751	9.41255	9.11701	8.72964	10.3118	9.62097	9.34241	9.04878	8.44511	10.1577	9.70825	9.41623	8.9773	8.51103	10.3052	9.66917	9.61803	9.61606	9.03758	10.2105	9.90143	10.015	9.8503	9.50351	10.3484	10.1784	10.2541	10.2586	9.74183
PCA_1-076	10.0924	9.64135	9.19916	9.11045	8.46357	10.1429	9.69962	9.44294	8.93195	8.35019	10.0952	9.59824	9.3557	9.24955	8.41867	10.2049	9.78067	9.66816	9.57361	8.95688	10.2289	9.82904	10.0494	9.93497	9.51775	10.2182	10.256	10.2174	10.3465	9.60679
PCA_1-077	10.1664	9.91144	9.37764	9.0843	8.54695	10.0905	9.68128	9.25071	9.00488	8.40666	10.1383	9.62346	9.47309	9.19699	8.54053	10.2204	9.87426	9.69621	9.56146	8.91163	10.1243	9.87068	10.0928	9.88349	9.36449	10.2378	10.1733	10.418	10.2812	9.77768
PCA_1-078	10.0665	9.6611	9.20562	9.11974	8.74423	10.1439	9.76193	9.24133	9.13138	8.41709	10.0707	9.61058	9.47602	9.1117	8.53565	10.2058	9.62027	9.70099	9.37775	8.89395	10.2543	9.89029	10.1596	9.91992	9.51738	10.2625	10.1089	10.2599	10.1051	9.78527
PCA_1-079	10.1682	9.70167	9.26328	9.14515	8.63217	10.0397	9.70574	9.21439	9.0961	8.48998	10.1588	9.74699	9.47578	9.13723	8.55489	10.2901	9.59088	9.51818	9.50768	8.96851	10.4093	9.99873	10.0142	9.92252	9.43414	10.3317	10.1993	10.291	10.2126	9.62965
PCA_1-080	10.0962	9.82451	9.42015	9.2116	8.66089	10.1024	9.78252	9.34678	9.10972	8.41921	10.3856	9.6989	9.43233	9.10502	8.58752	10.2583	9.80508	9.79182	9.64353	9.04864	10.1586	10.1885	10.2027	9.89363	9.48941	10.3617	10.1568	10.2718	10.224	9.55264
PCA_1-081	10.0536	9.8176	9.44602	9.29365	8.81824	10.0414	9.70571	9.31393	8.99633	8.49047	10.1396	9.70628	9.39009	9.16574	8.71593	10.2273	9.96335	9.76738	9.6158	8.93183	10.3215	9.97648	10.2101	9.81393	9.58601	10.0607	10.2235	10.2568	10.2292	9.48281
PCA_1-082	10.0843	9.90547	9.2924	8.93087	8.79655	10.2036	9.69522	9.36278	9.11314	8.66196	10.1571	9.68775	9.44243	9.19409	8.56055	10.3078	9.71721	9.66003	9.53386	8.90458	10.0738	10.0056	9.94116	10.0734	9.31438	10.3227	10.0603	10.1792	10.2371	9.65975
PCA_1-083	10.2322	9.92657	9.4305	9.09124	8.65676	10.2234	9.80479	9.27772	9.20318	8.41511	10.2822	9.72359	9.2914	9.24424	8.6756	10.215	9.78194	9.74813	9.46313	8.89479	10.1466	9.89457	10.0408	9.91686	9.36342	10.3645	10.1791	10.206	10.2253	9.49857
PCA_1-084	10.2673	9.77748	9.3927	9.24655	8.91771	10.2149	9.85314	9.42558	9.22508	8.34884	10.3194	9.61123	9.4305	9.17951	8.56069	10.4856	9.82834	9.8952	9.62589	8.95094	10.2634	9.98581	10.1014	9.88445	9.48544	10.226	10.1773	10.3547	10.1405	9.72574
PCA_1-085	10.2904	9.83414	9.5159	9.11455	8.82477	10.07	9.79734	9.45164	9.04299	8.55941	10.2772	9.72732	9.5383	9.2072	8.68253	10.4064	9.82885	9.70892	9.45358	8.86054	10.3033	10.059	10.1868	9.89746	9.36109	10.3259	10.1594	10.182	10.16	9.59243
PCA_1-086	10.2056	9.85536	9.39141	9.01943	8.81876	10.258	9.84228	9.41726	9.20096	8.62255	10.093	9.77961	9.53052	9.37924	8.55253	10.3585	9.74752	9.69857	9.83411	8.93265	10.3751	9.94642	10.0549	10.0729	9.43319	10.2068	10.1426	10.2225	10.3113	9.67369
PCA_1-087	10.2303	9.77212	9.3984	9.06412	8.91392	10.2141	9.78169	9.43099	9.12367	8.53912	10.0665	9.87875	9.68527	9.21345	8.59399	10.4173	9.81568	9.81498	9.69861	9.04081	10.4314	10.072	10.1313	9.90208	9.50217	10.3548	10.3127	10.2427	10.325	9.6621
PCA_1-088	10.1545	9.86068	9.56981	9.19726	8.7887	10.3621	9.75117	9.5153	9.0787	8.54842	10.3731	9.66049	9.42586	9.24489	8.54032	10.3588	9.83986	9.72612	9.65502	9.10374	10.361	10.0928	10.05	10.0272	9.50316	10.421	10.2378	10.344	10.3873	9.62748
PCA_1-089	10.291	9.87986	9.49552	9.31697	8.73455	10.2197	9.73201	9.32344	9.31189	8.70983	10.172	9.88272	9.55241	9.19644	8.66336	10.3115	9.81085	9.85383	9.45637	9.09143	10.2274	10.1498	10.0311	9.90717	9.35349	10.1815	10.2134	10.1911	10.2561	9.65143
PCA_1-090	10.1024	9.98829	9.55209	9.31896	8.90614	10.2756	10.0161	9.34111	9.13222	8.55401	10.3428	9.7664	9.60742	9.21493	8.83149	10.3681	9.84063	9.80375	9.6047	8.96806	10.2689	10.1398	10.0612	10.2521	9.39277	10.2543	10.3278	10.1352	10.1431	9.60611
PCA_1-091	10.3529	9.73717	9.49301	9.23795	8.89898	10.2816	9.72357	9.53467	9.14102	8.64235	10.2634	9.66747	9.52039	9.2717	8.72265	10.2139	9.91227	9.83987	9.59096	9.13415	10.4332	10.3281	9.79305	9.94794	9.47979	10.3505	10.3324	10.2005	10.1929	9.64435
PCA_1-092	10.2213	9.80292	9.43071	9.20051	9.02741	10.4086	9.80131	9.34359	9.14452	8.55264	10.3692	9.85459	9.58154	9.30721	8.6207	10.2174	9.845	9.80111	9.52337	9.28543	10.2795	10.1289	10.007	10.0027	9.37294	10.4069	10.2245	10.1129	10.3805	9.61573
PCA_1-093	10.421	9.90074	9.5985	9.05306	9.0229	10.1758	9.81424	9.46817	9.27884	8.58974	10.2787	9.60402	9.59466	9.30185	8.65974	10.3816	9.74052	9.73101	9.86887	9.14891	10.3054	10.1122	10.0027	9.87595	9.34546	10.4542	10.3295	10.2158	10.0714	9.49372
PCA_1-094	10.3949	9.79409	9.55108	9.22914	8.9353	10.2174	9.7667	9.55965	9.28041	8.63551	10.3677	9.82028	9.56414	9.25836	8.69703	10.4541	9.94022	9.76951	9.70169	9.08641	10.3879	10.1639	10.1401	9.94296	9.61506	10.5253	10.3726	10.0032	9.943	9.34583
PCA_1-095	10.3787	9.7519	9.64691	9.25116	9.21567	10.4821	9.80451	9.49196	9.28207	8.66898	10.3759	9.8164	9.55451	9.25639	8.61682	10.2903	9.96997	9.91665	9.60639	9.01765	10.1997	10.0749	9.81387	9.88657	9.37169	10.3917	10.2973	10.041	10.1037	9.46772
PCA_1-096	10.2257	9.79609	9.51415	9.02912	8.94638	10.487	9.79592	9.40342	9.09629	8.58521	10.4772	9.73992	9.63594	9.26372	8.67211	10.3656	9.9576	9.89313	9.81566	9.05913	10.3516	10.015	10.0357	9.90355	9.37704	10.4524	10.3523	10.2558	10.167	9.39469
PCA_1-097	10.5445	9.93159	9.42428	9.22294	8.99747	10.5091	9.75942	9.52231	9.29239	8.70646	10.4539	9.76497	9.84656	9.15452	8.73464	10.3133	9.92	9.83371	9.88778	9.1269	10.2733	10.0551	9.84945	10.0197	9.49678	10.4078	10.1396	10.0475	10.1372	9.66809
PCA_1-098	10.3577	9.84761	9.4928	9.19603	9.05502	10.4056	9.89679	9.51369	9.28302	8.74811	10.3627	9.63381	9.6158	9.27177	8.67952	10.186	9.89207	9.92237	9.68716	9.17456	10.1671	9.93381	9.89506	9.79265	9.40986	10.3033	10.0564	10.2603	10.1333	9.50695
PCA_1-099	10.3895	9.79143	9.5307	9.12915	9.16632	10.3653	9.77317	9.45562	9.30848	8.53745	10.2627	10.1085	9.30106	9.19411	8.82275	10.1708	9.86201	10.1327	9.71366	9.19081	10.3277	9.82934	9.97206	9.74458	9.31255	10.3038	10.3648	10.2436	10.2002	9.58468
PCA_1-100	10.2811	9.89013	9.42916	9.38402	8.88336	10.3719	9.94238	9.4916	9.4239	8.71456	10.2278	9.8232	9.77502	9.12769	8.72888	10.2342	9.86549	9.77059	9.70524	9.2286	10.3995	9.95943	10.0892	9.75626	9.41957	10.4051	10.2028	10.2545	10.1461	9.36567

## Sheet: lambda_0.01
Row	kernel_0mm_parcels_100	kernel_0mm_parcels_200	kernel_0mm_parcels_400	kernel_0mm_parcels_1000	kernel_0mm_vertex	kernel_5mm_parcels_100	kernel_5mm_parcels_200	kernel_5mm_parcels_400	kernel_5mm_parcels_1000	kernel_5mm_vertex	kernel_10mm_parcels_100	kernel_10mm_parcels_200	kernel_10mm_parcels_400	kernel_10mm_parcels_1000	kernel_10mm_vertex	kernel_20mm_parcels_100	kernel_20mm_parcels_200	kernel_20mm_parcels_400	kernel_20mm_parcels_1000	kernel_20mm_vertex	kernel_30mm_parcels_100	kernel_30mm_parcels_200	kernel_30mm_parcels_400	kernel_30mm_parcels_1000	kernel_30mm_vertex	kernel_40mm_parcels_100	kernel_40mm_parcels_200	kernel_40mm_parcels_400	kernel_40mm_parcels_1000	kernel_40mm_vertex
PCA_1-001	12.2188	12.129	12.1089	12.048	11.6112	12.2909	12.2055	12.2085	12.163	11.9251	12.3588	12.2617	12.2664	12.2519	12.0876	12.3165	12.2509	12.283	12.3288	12.1984	12.2719	12.2363	12.2668	12.3217	12.1736	12.2494	12.2032	12.2162	12.2938	12.1587
PCA_1-002	12.2099	12.1315	12.0831	12.0434	10.8391	12.3106	12.2822	12.2189	12.1681	11.0058	12.3374	12.2744	12.274	12.2556	11.6199	12.3339	12.2762	12.2867	12.3331	12.1574	12.2951	12.2701	12.2401	12.2885	12.2024	12.2391	12.2092	12.2113	12.2905	12.1832
PCA_1-003	11.8281	11.3482	10.9367	10.5603	10.8209	11.7964	11.3977	11.0257	10.5712	10.8681	11.7892	11.4204	11.1656	10.7485	10.8901	11.7944	11.5335	11.3629	11.103	11.3265	11.8061	11.5402	11.4904	11.3237	11.4311	11.798	11.6079	11.5469	11.4442	11.4961
PCA_1-004	10.9839	10.7963	10.8921	10.5546	9.70612	11.1159	10.9083	10.9323	10.5715	9.74357	11.1721	11.118	11.0609	10.7527	10.0052	11.2631	11.3076	11.2448	11.0705	10.8633	11.3001	11.3254	11.2824	11.188	10.92	11.3003	11.3325	11.3169	11.1755	10.9681
PCA_1-005	10.9837	10.703	10.6859	10.1175	9.10481	11.0853	10.8771	10.8211	10.2454	9.37747	11.1861	10.991	10.9357	10.609	9.9116	11.2777	11.1475	11.1749	11.042	10.8784	11.212	11.177	11.1737	11.1652	10.9586	11.2158	11.2172	11.2044	11.2016	10.962
PCA_1-006	11.0361	10.6643	10.3709	9.31572	8.87641	11.0761	10.7578	10.5755	9.60091	9.41075	11.1489	10.8701	10.8087	10.5178	9.81445	11.195	11.143	11.1376	11.0234	10.8671	11.2141	11.1734	11.1849	11.1718	11.0014	11.1665	11.1993	11.1986	11.2344	10.9662
PCA_1-007	10.7611	10.3901	9.87572	9.32857	8.69402	10.8783	10.7538	10.0066	9.39321	8.71568	11.0219	10.9378	10.7244	9.88933	8.79201	11.1343	11.1332	11.1332	10.9955	10.4709	11.2356	11.2338	11.2718	11.2371	10.8083	11.151	11.1667	11.2732	11.1929	10.9445
PCA_1-008	10.7491	10.1914	9.89732	9.32261	8.74909	10.8848	10.2783	9.96725	9.32237	8.72488	11.0376	10.6925	10.2613	9.69152	8.81915	11.1337	11.147	11.0224	10.8017	10.4253	11.1784	11.1619	11.0522	11.0464	10.7923	11.1533	11.1965	11.1887	11.1383	10.7881
PCA_1-009	10.864	10.1238	9.90241	9.29182	8.71041	10.9258	10.3343	9.91051	9.35487	8.72053	11.0649	10.4625	10.2067	9.69411	8.82104	11.1328	10.9683	10.6603	10.4613	9.99122	11.268	11.1657	11.0543	10.9369	10.6723	11.1862	11.1754	11.1753	11.104	10.8405
PCA_1-010	10.8139	9.973	9.62882	9.3159	8.75342	10.7509	10.036	9.64048	9.30601	8.75273	10.8816	10.0802	9.77323	9.47346	8.73336	11.0023	10.5592	10.226	10.0091	9.73164	11.2253	11.0456	10.5971	10.4551	10.2946	11.2253	11.194	10.8454	10.8232	10.7942
PCA_1-011	10.5993	9.92067	9.62317	9.33708	8.81315	10.8422	10.0486	9.60995	9.29638	8.68404	10.831	10.0824	9.821	9.448	8.70912	10.6877	10.5308	10.1967	9.9731	9.74388	10.7948	11.0189	10.4797	10.4021	10.1609	11.1575	11.1936	10.6689	10.7542	10.3601
PCA_1-012	10.5633	9.92952	9.58906	9.3371	8.72148	10.6845	10.0068	9.63674	9.34437	8.68573	10.6639	10.1657	9.74635	9.4918	8.75684	10.6538	10.3627	10.1794	9.98455	9.72531	10.7327	10.5421	10.4814	10.393	10.1534	10.762	10.6326	10.6592	10.6215	10.4597
PCA_1-013	10.5178	10.0003	9.6242	9.3382	8.58276	10.6127	10.0235	9.65461	9.38749	8.4254	10.7321	10.1066	9.72694	9.49349	8.66609	10.6686	10.3288	10.1758	9.9429	9.67282	10.6721	10.5528	10.4731	10.4061	10.2148	10.7102	10.6282	10.6275	10.62	10.3083
PCA_1-014	10.5557	9.76193	9.56109	9.06862	8.53996	10.6295	9.85551	9.5799	9.35873	8.42324	10.7816	9.97456	9.74443	9.48146	8.70922	10.6007	10.2375	10.1543	9.89906	9.70703	10.538	10.366	10.2647	10.2191	10.2191	10.5951	10.5954	10.445	10.4049	10.3503
PCA_1-015	10.5694	9.83086	9.55484	9.05299	8.53619	10.6245	9.86591	9.65312	9.21559	8.42728	10.8237	9.98767	9.79022	9.44508	8.60528	10.7321	10.2415	10.121	9.85723	9.64974	10.7257	10.3804	10.3458	10.1883	10.135	10.6244	10.5032	10.4116	10.3663	10.3132
PCA_1-016	10.4241	9.86552	9.32356	8.89032	8.48533	10.3901	9.88197	9.45699	8.88133	8.42584	10.5008	9.99591	9.77427	9.45276	8.53879	10.5688	10.221	10.1605	9.93322	9.6588	10.6258	10.3991	10.3113	10.2194	10.1356	10.6715	10.4785	10.5439	10.4405	10.3173
PCA_1-017	10.3894	9.80254	9.29617	8.85076	8.41143	10.5609	9.90362	9.45118	8.8891	8.41277	10.5247	9.98683	9.71557	9.27698	8.52426	10.5372	10.2414	10.1048	9.90493	9.58521	10.6205	10.3584	10.3011	10.247	10.1283	10.6447	10.4865	10.472	10.3725	10.2717
PCA_1-018	10.358	9.85641	9.24783	8.82643	8.398	10.4885	9.8783	9.39662	8.86935	8.37943	10.5227	9.97461	9.71403	9.24395	8.63761	10.6098	10.289	10.1561	9.95068	9.55793	10.5469	10.4553	10.3161	10.2299	10.1764	10.7266	10.5267	10.3688	10.4444	10.3537
PCA_1-019	10.4421	9.75663	9.29707	8.87245	8.26959	10.4926	9.86312	9.41105	8.8667	8.35988	10.5493	10.0011	9.65282	9.26846	8.53397	10.557	10.189	10.0702	9.90137	9.3175	10.6169	10.4404	10.2965	10.2276	10.0857	10.6327	10.4671	10.4891	10.3535	10.2045
PCA_1-020	10.3992	9.78544	9.16249	8.95605	8.33257	10.4143	9.79762	9.26556	8.89734	8.3571	10.5843	9.91372	9.4964	9.24282	8.6079	10.5158	10.1993	10.0683	9.95317	9.31086	10.6405	10.3661	10.3199	10.2852	10.1668	10.5908	10.4263	10.4165	10.3531	10.1824
PCA_1-021	10.2728	9.78297	9.2642	8.79027	8.37604	10.4253	9.88283	9.33226	8.93606	8.36236	10.5476	10.0262	9.64196	9.20095	8.59502	10.578	10.2072	10.1621	9.98549	9.27818	10.5517	10.292	10.2348	10.3316	10.1698	10.5739	10.4267	10.3746	10.3802	10.1595
PCA_1-022	10.2781	9.67952	9.18762	8.81334	8.28708	10.4091	9.76841	9.31488	8.9576	8.30774	10.4473	10.031	9.5006	9.1899	8.57692	10.5521	10.1736	10.1537	9.9828	9.39563	10.5299	10.3295	10.3089	10.307	9.95602	10.7002	10.4449	10.4832	10.3403	10.1107
PCA_1-023	10.2592	9.75933	9.19683	8.85197	8.27954	10.3482	9.7611	9.31456	8.87324	8.31006	10.5055	9.93688	9.54828	9.09985	8.54199	10.5952	10.1293	10.0255	9.96566	9.31722	10.4893	10.3338	10.3224	10.3103	9.94573	10.5428	10.4062	10.4065	10.365	10.208
PCA_1-024	10.1856	9.80741	9.165	8.83252	8.29213	10.2109	9.77445	9.43038	8.83486	8.40686	10.4274	9.90075	9.47636	9.02678	8.59458	10.5939	10.163	9.89875	9.80885	9.2693	10.5104	10.3577	10.393	10.2451	9.9466	10.5837	10.4097	10.3764	10.3682	10.1997
PCA_1-025	10.1671	9.66932	9.27323	8.86184	8.24339	10.3973	9.84963	9.34526	8.88187	8.45199	10.4445	9.89446	9.49784	9.03031	8.62108	10.4439	10.2008	9.93473	9.82893	9.32536	10.5298	10.377	10.168	10.2987	9.81784	10.6046	10.4243	10.3994	10.2999	10.2185
PCA_1-026	10.2808	9.65191	9.18319	8.7416	8.2916	10.3485	9.8171	9.29917	8.80929	8.37541	10.4183	9.85844	9.49357	9.02903	8.57878	10.5259	10.1603	9.92083	9.76333	9.23478	10.4888	10.4565	10.3418	10.1341	9.91888	10.5074	10.5231	10.4277	10.3724	10.2147
PCA_1-027	10.1704	9.59028	9.20238	8.80385	8.28803	10.3054	9.66105	9.24003	8.86113	8.45718	10.4104	9.86294	9.50753	8.98763	8.59035	10.4709	10.0815	9.96713	9.7186	9.33162	10.5998	10.3974	10.2423	10.1823	9.77352	10.5345	10.5918	10.4665	10.4478	10.1408
PCA_1-028	10.1792	9.70577	9.2053	8.73533	8.27288	10.2788	9.62469	9.3138	8.80446	8.41348	10.3782	9.76143	9.53762	9.0367	8.62089	10.5226	10.2138	9.9324	9.76766	9.29628	10.5429	10.3511	10.2016	10.2138	9.71159	10.5305	10.5083	10.3413	10.4199	10.254
PCA_1-029	10.1708	9.54508	9.1573	8.80431	8.40574	10.1271	9.74582	9.38425	8.76573	8.51074	10.2526	9.70203	9.47725	9.00915	8.55071	10.5403	10.1112	9.89896	9.63476	9.28472	10.4288	10.3797	10.2656	10.2642	9.7472	10.5624	10.4699	10.357	10.3825	10.0543
PCA_1-030	10.1192	9.51919	9.22468	8.8149	8.3161	10.1446	9.54924	9.22558	8.80876	8.40089	10.2804	9.66973	9.46129	9.00864	8.5907	10.3457	10.2673	10.0392	9.55793	9.25303	10.5512	10.3388	10.2421	10.1477	9.81229	10.6294	10.4763	10.2904	10.3401	10.1344
PCA_1-031	10.0991	9.55668	9.14846	8.77373	8.26488	10.1266	9.58177	9.25473	8.82606	8.49938	10.2989	9.65368	9.54512	9.0001	8.53924	10.3432	10.173	10.0741	9.63857	9.3052	10.5348	10.4181	10.211	10.1312	9.97797	10.5992	10.4276	10.3775	10.3049	10.1857
PCA_1-032	10.0752	9.54321	9.17728	8.85171	8.28088	10.2115	9.48906	9.27926	8.72932	8.36055	10.2111	9.70082	9.5288	9.04674	8.5836	10.3972	10.161	9.93593	9.64218	9.25527	10.5751	10.4702	10.222	10.216	9.84421	10.6104	10.5458	10.466	10.2988	10.1529
PCA_1-033	10.0594	9.53438	9.18688	8.85114	8.39735	10.164	9.5553	9.24766	8.81082	8.3997	10.2075	9.77771	9.52163	8.87699	8.46347	10.3307	10.0382	9.89951	9.70768	9.12882	10.4666	10.39	10.2159	10.12	9.7682	10.5878	10.5372	10.4359	10.3153	10.1122
PCA_1-034	10.0779	9.54908	9.1947	8.84539	8.38979	10.1279	9.5994	9.26862	8.85559	8.34793	10.2144	9.73501	9.42187	8.87031	8.58217	10.4833	10.0057	10.0796	9.6416	9.15938	10.46	10.4388	10.2133	10.1248	9.62837	10.5945	10.6256	10.3848	10.3316	10.0971
PCA_1-035	10.1349	9.52831	9.24379	8.80723	8.39189	10.1418	9.52809	9.20615	8.77281	8.33076	10.2005	9.71405	9.35251	9.00225	8.53477	10.468	10.0894	9.90912	9.68938	9.12437	10.4729	10.3903	10.2013	10.1552	9.81567	10.453	10.4639	10.4621	10.256	9.83151
PCA_1-036	10.0797	9.51347	9.18036	8.77669	8.29795	10.2334	9.62095	9.11342	8.87832	8.33197	10.3677	9.65776	9.35191	8.94996	8.45947	10.4034	10.0713	9.7843	9.61293	9.19301	10.5109	10.2867	10.2399	10.0703	9.71749	10.4219	10.4867	10.2458	10.3033	9.85067
PCA_1-037	10.1253	9.52847	9.22259	8.84782	8.39407	10.1487	9.68009	9.25552	8.84044	8.44206	10.2125	9.69472	9.24923	8.96704	8.54952	10.3633	9.98551	9.7558	9.60955	9.11636	10.4402	10.3725	10.2384	10.0157	9.7582	10.4733	10.5989	10.394	10.3739	9.74285
PCA_1-038	10.0803	9.61386	9.14143	8.88222	8.3017	10.1378	9.59684	9.19404	8.8174	8.34541	10.2818	9.60309	9.3214	8.96708	8.44308	10.456	9.80011	9.74569	9.59911	9.16197	10.3923	10.4103	10.1961	10.0687	9.69444	10.4159	10.5764	10.3607	10.3304	9.83135
PCA_1-039	10.0893	9.65385	9.24434	8.89063	8.27175	10.1385	9.57618	9.26436	8.84291	8.36917	10.3213	9.60192	9.20938	9.0829	8.48759	10.3727	9.9185	9.69175	9.64105	9.06741	10.4702	10.3002	10.264	10.1306	9.78498	10.4875	10.3869	10.3847	10.3789	9.69056
PCA_1-040	10.0747	9.62075	9.19819	8.8951	8.35664	10.2893	9.58594	9.17551	8.85255	8.42777	10.4662	9.68046	9.34831	8.99183	8.40565	10.4994	9.93818	9.80247	9.68565	9.0655	10.5159	10.2629	10.0544	10.0666	9.7053	10.4564	10.4656	10.3402	10.308	9.70854
PCA_1-041	10.0476	9.77355	9.25109	8.87882	8.22771	10.2139	9.64628	9.24448	8.8416	8.31023	10.4552	9.65285	9.30189	9.04983	8.53499	10.422	9.89833	9.81774	9.60489	9.18596	10.3926	10.2824	10.1749	10.0226	9.74778	10.3894	10.5097	10.4453	10.3219	9.80038
PCA_1-042	10.1662	9.68939	9.25606	8.92498	8.37834	10.2703	9.5841	9.34354	8.82199	8.19881	10.31	9.57592	9.41946	8.93796	8.47247	10.4491	9.84112	9.79899	9.6444	9.28453	10.3397	10.1923	10.1186	10.1261	9.58244	10.4483	10.4927	10.2998	10.3568	9.60089
PCA_1-043	10.1468	9.52996	9.23729	8.87498	8.52533	10.2265	9.65756	9.18336	8.9215	8.31623	10.3747	9.56411	9.28949	9.01245	8.53091	10.4189	9.85941	9.6635	9.48061	9.13979	10.4379	10.1786	10.1392	10.0233	9.64487	10.4621	10.5882	10.2738	10.2704	9.77692
PCA_1-044	10.2129	9.74383	9.20904	8.85406	8.42941	10.3227	9.70245	9.25886	8.83919	8.30246	10.3794	9.61039	9.27911	8.93046	8.52663	10.476	9.70466	9.66729	9.42403	9.10841	10.3772	10.1493	10.0673	9.97024	9.66291	10.4586	10.4068	10.3649	10.3699	9.7969
PCA_1-045	10.2881	9.71041	9.27084	8.91688	8.51537	10.2934	9.65962	9.23657	8.8197	8.34819	10.3736	9.60006	9.32451	9.05619	8.36526	10.3711	9.79679	9.62833	9.47861	9.09203	10.3738	10.0312	10.1197	9.85129	9.65433	10.3304	10.3271	10.2245	10.1628	9.7058
PCA_1-046	10.194	9.60732	9.28708	8.90118	8.62486	10.2619	9.66437	9.22817	8.88685	8.31682	10.3874	9.5779	9.37094	8.96624	8.38298	10.4022	9.85267	9.63743	9.51864	9.02776	10.4033	10.1284	10.0527	9.86004	9.60146	10.3796	10.2255	10.2052	10.111	9.61288
PCA_1-047	10.1041	9.50212	9.30022	9.08783	8.63977	10.2575	9.62755	9.28073	8.87797	8.32404	10.2473	9.63159	9.16809	8.94997	8.45228	10.4743	9.88904	9.67908	9.41055	9.09492	10.3936	10.0541	10.0292	9.9715	9.60525	10.3192	10.2066	10.1812	10.1485	9.69531
PCA_1-048	10.1206	9.60457	9.265	8.83145	8.50106	10.1524	9.56452	9.30019	8.89036	8.39726	10.3826	9.51039	9.29337	9.04505	8.46433	10.1171	9.8113	9.67792	9.38261	9.05111	10.3759	10.1683	10.0151	9.93964	9.52095	10.4537	10.2457	10.1387	10.2032	9.7026
PCA_1-049	10.2577	9.6122	9.27594	8.83514	8.45345	10.2139	9.74396	9.19176	8.93958	8.28117	10.3761	9.60966	9.20553	8.90803	8.42586	10.2886	9.852	9.68358	9.42491	8.97284	10.2415	10.0803	9.8883	10.1019	9.60016	10.2109	10.2102	10.1984	10.207	9.79514
PCA_1-050	10.1388	9.53811	9.30153	8.89983	8.49977	10.2625	9.5543	9.28222	8.7495	8.30882	10.1807	9.69637	9.19607	8.96049	8.49649	10.2861	9.78196	9.74486	9.43333	8.92589	10.3393	10.069	10.0077	10.0067	9.60893	10.2338	10.1763	10.1785	10.0359	9.68231
PCA_1-051	10.156	9.55986	9.36654	8.85696	8.45459	10.2782	9.56907	9.2955	8.91865	8.38835	10.3111	9.51555	9.39513	8.90215	8.40186	10.3218	9.69432	9.68999	9.50866	8.92242	10.2408	10.1354	9.92786	10.1247	9.63039	10.2397	10.133	10.2107	10.1236	9.68133
PCA_1-052	10.1925	9.70763	9.18873	8.94824	8.48842	10.2512	9.65791	9.26212	8.83011	8.34127	10.2042	9.57688	9.23379	8.87819	8.47738	10.2611	9.70573	9.73216	9.59645	8.85913	10.1942	10.1716	9.9317	10.1228	9.5539	10.1103	10.1633	10.3063	10.2049	9.68809
PCA_1-053	10.2055	9.5293	9.28055	8.91394	8.61373	10.1397	9.54716	9.38508	8.75884	8.33207	10.2288	9.59303	9.25713	8.9422	8.43008	10.1834	9.79445	9.60112	9.42275	8.93763	10.227	10.1926	10.1711	10.0195	9.6161	10.1612	10.1909	10.1065	10.0384	9.70639
PCA_1-054	10.1757	9.68888	9.28154	8.93087	8.54106	10.2351	9.68099	9.32463	8.88402	8.3977	10.2673	9.72726	9.25017	8.85213	8.48023	10.2469	9.72671	9.50496	9.42133	8.97782	10.1662	10.0411	10.1193	9.99101	9.66342	10.0643	10.1265	10.1211	10.2303	9.7016
PCA_1-055	10.1652	9.58808	9.24198	8.92339	8.48761	10.2666	9.56144	9.18011	8.85992	8.28021	10.2921	9.57404	9.34593	9.07306	8.42282	10.2568	9.76755	9.62856	9.45098	9.00656	10.0666	10.0767	10.0352	10.0169	9.60434	10.0712	10.1535	10.1199	10.1268	9.61507
PCA_1-056	10.1252	9.64108	9.18724	8.91923	8.53926	10.2449	9.65782	9.16332	8.76432	8.43299	10.322	9.62263	9.34942	8.98591	8.48464	10.0618	9.81589	9.63932	9.43173	9.02663	10.2165	10.0121	9.90338	9.9047	9.49055	10.0468	10.2846	10.2611	10.1758	9.57235
PCA_1-057	10.1083	9.51176	9.19647	8.90406	8.518	10.367	9.51201	9.25103	8.82546	8.26449	10.2493	9.5404	9.28016	8.8698	8.41372	10.0163	9.73518	9.56322	9.5373	8.91645	10.1708	10.0057	10.1023	9.94492	9.45334	10.1545	10.1192	10.0658	10.1538	9.69877
PCA_1-058	10.1234	9.56513	9.21523	8.85428	8.5849	10.1477	9.57992	9.40075	8.81773	8.39437	10.4132	9.59902	9.40709	8.88375	8.62983	10.081	9.82266	9.64617	9.41895	8.8695	10.007	10.1403	10.0625	10.1243	9.43769	10.1351	10.0922	10.0731	10.2784	9.62092
PCA_1-059	10.2227	9.48978	9.35461	8.83763	8.44677	10.2235	9.5764	9.247	8.8754	8.38235	10.2179	9.62346	9.31341	8.97836	8.55234	10.1188	9.87485	9.59459	9.42081	8.90385	10.1839	9.96583	10.0638	10.0607	9.5565	10.1323	10.2546	10.0656	10.1334	9.6768
PCA_1-060	10.1495	9.53622	9.31473	8.915	8.31357	10.2869	9.61533	9.29455	8.86158	8.33453	10.2131	9.57413	9.33344	9.13931	8.45296	10.2104	9.70623	9.65787	9.44515	8.88632	10.1775	10.1025	10.0727	10.0622	9.57496	10.2081	10.124	10.1916	10.1676	9.75612
PCA_1-061	10.1758	9.59212	9.23154	8.92382	8.32797	10.2139	9.61485	9.35374	8.81698	8.27199	10.0957	9.7511	9.25721	9.03977	8.54586	10.0701	9.73757	9.55158	9.36476	9.04977	10.1556	10.1124	10.0528	10.1117	9.54354	10.0644	10.2415	10.1275	10.1565	9.62765
PCA_1-062	10.1861	9.64049	9.27089	8.86853	8.34792	10.2031	9.64198	9.33329	8.79009	8.3815	10.2311	9.58197	9.42602	8.90003	8.52204	9.99988	9.77585	9.64748	9.51488	8.84769	10.2208	10.0753	10.0472	9.9939	9.5994	10.0433	10.1765	10.1398	10.2402	9.75841
PCA_1-063	10.0378	9.67536	9.36759	8.92663	8.26208	10.1328	9.46771	9.33575	8.89047	8.27152	10.221	9.64929	9.35881	8.95977	8.46684	10.1537	9.72028	9.69085	9.49941	8.96261	10.2587	10.1551	10.039	9.93363	9.41421	10.2169	10.2559	10.1149	10.3538	9.65889
PCA_1-064	9.91221	9.54489	9.44369	8.88774	8.40548	9.98559	9.65011	9.46163	8.84715	8.24005	10.1118	9.61807	9.39129	9.07064	8.5216	10.0964	9.72128	9.70857	9.58623	8.9889	10.1026	10.0993	9.9843	10.0087	9.51774	10.1875	10.1715	10.0942	10.3106	9.75722
PCA_1-065	9.98791	9.52673	9.23387	8.89303	8.3882	10.0964	9.49166	9.34981	8.89797	8.37868	10.2311	9.50286	9.64157	9.06941	8.57829	10.2457	9.90534	9.71837	9.64277	8.92261	10.1544	10.2378	9.89826	9.87488	9.53702	10.1435	10.2048	10.0804	10.1127	9.59867
PCA_1-066	10.0384	9.48297	9.29678	8.93641	8.50524	10.0203	9.62143	9.36714	8.95422	8.26082	10.1849	9.63101	9.3953	9.15144	8.56833	10.1433	9.74011	9.61328	9.50205	8.9157	10.0819	9.98935	10.0591	9.98788	9.35937	10.1471	10.2223	10.2668	10.2738	9.76933
PCA_1-067	10.0862	9.64904	9.25135	9.02947	8.62695	10.1632	9.65618	9.3195	8.92776	8.19103	10.2443	9.73903	9.29229	9.14417	8.55578	10.1554	9.70324	9.7363	9.52314	8.90666	10.2482	9.98748	9.95776	9.81512	9.53636	10.1917	10.4004	10.2396	10.1533	9.68064
PCA_1-068	10.2217	9.62923	9.37427	8.93583	8.29038	10.0752	9.76547	9.37509	8.96781	8.30733	10.3387	9.56227	9.54294	9.14404	8.54493	10.2566	9.75261	9.80153	9.56878	8.92027	10.0819	9.98762	9.86811	9.85543	9.24835	10.2469	10.2588	10.1511	10.0876	9.63888
PCA_1-069	10.0389	9.68477	9.2558	8.88433	8.49817	10.0428	9.62209	9.43635	9.00178	8.37809	10.2311	9.57736	9.31414	9.06164	8.60079	10.0658	9.81967	9.6166	9.62804	8.95654	10.2053	9.95937	9.96064	9.879	9.35191	10.3592	10.2395	10.3497	10.1732	9.63117
PCA_1-070	10.0509	9.73515	9.29633	8.95905	8.37104	9.98278	9.66347	9.43511	8.96717	8.41231	10.1274	9.73462	9.42029	9.12006	8.48693	10.0884	9.73063	9.70046	9.47781	8.88272	10.1615	10.1119	10.0753	10.0175	9.30999	10.1946	10.3662	10.2671	10.2951	9.86689
PCA_1-071	10.1631	9.60277	9.29674	9.00666	8.47393	10.0789	9.54427	9.19727	9.04614	8.32891	10.1627	9.82718	9.40965	9.06148	8.61302	10.1602	9.73971	9.75652	9.38542	8.84954	10.1255	9.93261	9.94995	9.88855	9.46214	10.3397	10.2906	10.4035	10.09	9.66173
PCA_1-072	10.1667	9.77469	9.19593	9.04018	8.38858	10.0182	9.61028	9.28618	8.97649	8.30837	10.2043	9.52096	9.43312	9.06067	8.50626	10.1756	9.76215	9.69808	9.41524	8.90406	10.19	10.0613	10.0807	9.85886	9.43878	10.3072	10.2793	10.2927	10.2107	9.74671
PCA_1-073	10.0767	9.59516	9.30984	9.0147	8.57536	10.2007	9.71537	9.43797	9.05585	8.31042	10.1543	9.71185	9.44115	9.06131	8.55495	10.0554	9.64353	9.63428	9.52504	8.99574	10.1267	9.92612	10.0068	9.92294	9.51326	10.1084	10.21	10.3166	10.1933	9.68022
PCA_1-074	9.99618	9.67911	9.2828	8.98561	8.52513	9.94295	9.63788	9.38621	8.95655	8.40275	10.2933	9.69453	9.35457	8.98567	8.60768	10.2174	9.70244	9.8219	9.45668	9.10477	10.2209	10.024	10.0725	9.89975	9.38428	10.2269	10.2794	10.2874	10.1964	9.80719
PCA_1-075	10.0261	9.69966	9.38812	8.9905	8.7191	10.066	9.67622	9.33326	9.02892	8.40228	10.1758	9.64122	9.54069	9.07551	8.35783	10.2366	9.72724	9.68416	9.5202	8.94015	10.1351	10.0071	9.9937	9.92421	9.37153	10.3061	10.2779	10.2704	10.1793	9.71287
PCA_1-076	9.95706	9.77116	9.27087	9.00275	8.50001	10.0121	9.68257	9.29766	8.92255	8.45473	10.2375	9.61184	9.41505	9.07657	8.4987	10.2242	9.86455	9.60254	9.4353	8.93474	10.2749	9.89491	10.2287	9.85617	9.40371	10.19	10.1817	10.3009	10.2957	9.7875
PCA_1-077	10.0057	9.77396	9.33695	9.1631	8.76281	10.1888	9.72924	9.27081	9.13354	8.30304	10.3083	9.62094	9.53982	9.05999	8.4415	10.3278	9.56776	9.67999	9.6021	9.09766	10.3892	9.9186	10.0284	9.85254	9.38312	10.1615	10.2029	10.2688	10.2016	9.85478
PCA_1-078	10.0335	9.64395	9.20203	8.96418	8.84742	10.1335	9.68791	9.36219	9.04743	8.48591	10.2676	9.53283	9.60931	9.13644	8.55997	10.1406	9.78804	9.65643	9.41787	8.81709	10.1092	9.93797	10.0987	10.098	9.28025	10.2404	10.3807	10.3105	10.1749	9.66519
PCA_1-079	10.0203	9.52436	9.37244	9.06834	8.66628	10.0307	9.85357	9.33481	9.11283	8.37286	10.1946	9.83122	9.43825	9.01447	8.63447	10.1694	9.78426	9.75004	9.57089	9.0481	10.1819	10.0127	10.0623	9.93571	9.44419	10.2665	10.1001	10.3706	10.159	9.58271
PCA_1-080	10.2097	9.6806	9.28451	9.06178	8.67329	10.1547	9.78349	9.33805	8.96729	8.45949	10.084	9.65887	9.4552	9.23657	8.43236	10.2177	9.79525	9.78881	9.4424	8.92378	10.2161	9.8568	9.96569	10.02	9.39784	10.1961	10.2184	10.2495	10.257	9.4637
PCA_1-081	10.1869	9.7886	9.2491	9.11615	8.89756	10.2249	9.68997	9.32728	9.00643	8.46423	10.1185	9.54479	9.44353	9.19057	8.47989	10.1294	9.72284	9.57447	9.44724	9.04069	10.1035	9.98726	10.1756	9.9494	9.31912	10.27	10.1624	10.3444	10.2922	9.54235
PCA_1-082	10.1274	9.84337	9.36733	9.23785	8.82451	10.1082	9.79283	9.37345	9.12115	8.42601	10.0523	9.87405	9.47458	9.16319	8.59562	10.2015	9.74062	9.80379	9.42853	9.0089	10.1709	9.98034	10.0488	9.91996	9.43025	10.2386	10.0766	10.203	10.2254	9.55602
PCA_1-083	10.2578	9.84304	9.35788	9.00726	8.61666	10.1246	9.88058	9.32939	9.1408	8.47024	10.1213	9.62811	9.56456	9.2666	8.5542	10.3816	9.9282	9.72922	9.5289	9.07395	10.1494	10.0043	10.1291	9.99918	9.62857	10.3217	10.1621	10.1901	10.0043	9.60042
PCA_1-084	10.1294	9.97908	9.32249	9.18731	8.7005	10.1805	9.72773	9.50827	9.07084	8.58701	10.2063	9.76735	9.50317	9.09582	8.63807	10.2272	9.89194	9.73518	9.65354	8.9311	10.1596	9.99968	10.0713	9.96033	9.50453	10.3449	10.3329	10.2138	9.9866	9.51902
PCA_1-085	10.1183	9.80878	9.37568	9.28914	8.78815	10.3255	9.70306	9.44777	9.19907	8.51781	10.2187	9.79376	9.51862	9.28906	8.57031	10.2779	9.9326	9.87277	9.36843	9.05019	10.1829	9.95595	10.1051	9.88316	9.39588	10.3242	10.0969	10.2439	10.2481	9.46378
PCA_1-086	10.1444	9.99305	9.50907	9.16724	8.84591	10.1802	9.8596	9.38793	9.05859	8.48115	10.2659	9.78505	9.44722	9.29161	8.58286	10.3486	9.7798	9.72622	9.3849	8.88171	10.3156	10.0524	10.0576	9.88455	9.33787	10.0592	10.1984	10.1369	10.2314	9.65192
PCA_1-087	10.2242	9.81192	9.39681	9.10751	8.98779	10.2956	9.74705	9.45967	9.12864	8.3786	10.3478	9.7629	9.64171	9.15732	8.55203	10.227	9.71894	9.81327	9.60288	8.90053	10.2424	9.97924	10.0781	9.81672	9.45581	10.2804	10.1889	10.2117	10.2576	9.65505
PCA_1-088	10.2861	9.83102	9.50832	9.10804	8.7061	10.2059	9.72571	9.51958	9.19216	8.48421	10.1021	9.77826	9.6104	9.30682	8.68299	10.3784	9.69118	9.83255	9.62649	9.03464	10.3723	10.0681	9.92334	10.098	9.36559	10.3652	10.4131	10.2718	10.3467	9.58979
PCA_1-089	10.3665	9.95899	9.48129	9.03162	8.93945	10.2415	9.79678	9.46494	9.15197	8.61084	10.1713	9.79431	9.59169	9.2798	8.65463	10.267	9.69589	9.72059	9.68537	9.26623	10.262	10.2415	9.96507	9.94647	9.56304	10.4245	10.1811	10.1619	10.2279	9.60817
PCA_1-090	10.0927	9.85062	9.43942	9.11272	9.03038	10.2482	9.98785	9.58107	9.16559	8.7221	10.349	9.71387	9.69213	9.22027	8.71567	10.4348	9.80022	9.76798	9.52119	9.18307	10.1394	10.1801	9.90195	9.94984	9.42301	10.3529	10.3021	10.1434	10.2332	9.62906
PCA_1-091	10.3314	9.88924	9.63984	9.19085	9.20602	10.2622	9.65671	9.40098	9.20542	8.59796	10.3528	9.69829	9.39905	9.28776	8.75756	10.2398	9.80636	9.74227	9.66588	8.98345	10.1458	9.92823	9.9023	10.0281	9.38407	10.3206	10.4113	10.08	10.2391	9.63034
PCA_1-092	10.3183	9.88634	9.45924	9.23551	9.20961	10.2453	9.76336	9.32778	9.05026	8.58991	10.3356	9.67127	9.52872	9.27335	8.6548	10.2668	9.94367	9.7398	9.65746	9.00121	10.3141	10.0556	10.0082	9.93027	9.37967	10.2221	10.4378	10.1313	10.2632	9.5101
PCA_1-093	10.4341	9.95404	9.41263	9.19771	9.0891	10.2923	9.78602	9.34981	9.30792	8.65862	10.2343	9.76571	9.44728	9.2389	8.89268	10.3845	9.85279	9.9822	9.64056	9.06761	10.1969	9.96406	9.93121	9.8008	9.38772	10.2793	10.2161	10.127	10.1162	9.34832
PCA_1-094	10.5385	9.79275	9.49455	9.20838	8.96014	10.3837	9.76763	9.42194	9.22587	8.60039	10.4083	9.80257	9.60354	9.13405	8.73781	10.2405	9.90583	9.85449	9.56783	9.06641	10.2623	10.1753	10.0263	10.0486	9.43824	10.2864	10.4377	10.0642	10.1209	9.55249
PCA_1-095	10.3679	9.74851	9.47639	9.13061	8.97944	10.3698	9.8162	9.50349	9.08587	8.63644	10.538	9.69618	9.50875	9.20121	8.79491	10.2733	10.0781	9.86171	9.62837	9	10.2864	10.1288	9.9412	10.0082	9.33285	10.3867	10.3088	10.1398	9.91455	9.71899
PCA_1-096	10.3145	9.71777	9.49548	9.15381	8.92425	10.2825	9.756	9.55952	9.29681	8.62825	10.3989	9.72403	9.5715	9.30508	8.72703	10.1897	9.90195	9.8876	9.75471	8.90253	10.3689	9.95745	9.9633	9.93627	9.44404	10.2382	10.34	10.1653	10.0346	9.36904
PCA_1-097	10.3347	9.76161	9.50221	9.27935	9.0282	10.5333	9.80523	9.45411	9.10927	8.67281	10.2622	9.63391	9.47235	9.26494	8.65593	10.4123	9.85175	9.68833	9.67688	9.26134	10.1421	9.9442	9.9472	9.94241	9.4125	10.4838	10.4641	10.0739	10.2024	9.66384
PCA_1-098	10.3432	9.9045	9.53876	9.07423	9.21323	10.2217	9.68548	9.5279	9.23639	8.70101	10.3905	9.91518	9.4438	9.27247	8.78139	10.2078	9.96191	9.81565	9.6083	9.16117	10.1385	9.97694	9.93562	9.685	9.42088	10.3384	10.1872	10.1714	10.337	9.54099
PCA_1-099	10.3233	9.81432	9.53944	9.04508	9.08446	10.0916	9.76953	9.42555	9.29701	8.54475	10.2427	9.67141	9.55543	9.21435	8.6003	10.3194	9.90605	10.1008	9.82118	9.10365	10.4708	9.98785	10.0153	9.96675	9.41416	10.4245	10.2113	10.0973	10.1088	9.3897
PCA_1-100	10.2786	9.9731	9.37046	9.15315	8.7995	10.3936	9.80114	9.43922	9.21672	8.72366	10.3546	9.99394	9.4919	9.17706	8.61537	10.2367	9.73066	9.77645	9.72665	9.16832	10.3174	10.026	10.0766	9.7973	9.57332	10.4772	10.2279	10.1889	10.151	9.44207

## Sheet: lambda_0.021544
Row	kernel_0mm_parcels_100	kernel_0mm_parcels_200	kernel_0mm_parcels_400	kernel_0mm_parcels_1000	kernel_0mm_vertex	kernel_5mm_parcels_100	kernel_5mm_parcels_200	kernel_5mm_parcels_400	kernel_5mm_parcels_1000	kernel_5mm_vertex	kernel_10mm_parcels_100	kernel_10mm_parcels_200	kernel_10mm_parcels_400	kernel_10mm_parcels_1000	kernel_10mm_vertex	kernel_20mm_parcels_100	kernel_20mm_parcels_200	kernel_20mm_parcels_400	kernel_20mm_parcels_1000	kernel_20mm_vertex	kernel_30mm_parcels_100	kernel_30mm_parcels_200	kernel_30mm_parcels_400	kernel_30mm_parcels_1000	kernel_30mm_vertex	kernel_40mm_parcels_100	kernel_40mm_parcels_200	kernel_40mm_parcels_400	kernel_40mm_parcels_1000	kernel_40mm_vertex
PCA_1-001	12.2035	12.1179	12.1319	12.0759	11.6499	12.3073	12.2125	12.2191	12.1963	11.9208	12.3284	12.2803	12.2758	12.2581	12.0826	12.3372	12.2615	12.2832	12.3035	12.1848	12.2793	12.2281	12.2589	12.3077	12.17	12.2384	12.1984	12.2213	12.2966	12.2173
PCA_1-002	12.2241	12.1269	12.1206	12.029	10.8144	12.3129	12.2624	12.2025	12.1605	11.0059	12.341	12.2995	12.266	12.2854	11.643	12.3339	12.268	12.2932	12.3493	12.1809	12.3423	12.2451	12.2616	12.2801	12.1765	12.275	12.2404	12.2351	12.2838	12.1961
PCA_1-003	11.827	11.3567	10.9255	10.5472	10.859	11.8281	11.3989	11.0393	10.5795	10.8928	11.8235	11.487	11.1549	10.7479	10.9007	11.7918	11.5227	11.3538	11.1222	11.3357	11.7967	11.5602	11.4936	11.3089	11.45	11.7934	11.6251	11.524	11.4489	11.4773
PCA_1-004	11.0133	10.8058	10.8996	10.5242	9.71071	11.0874	10.9047	10.9284	10.6194	9.74416	11.1493	11.0925	11.0957	10.7581	10.0185	11.266	11.2384	11.2576	11.0948	10.8862	11.3108	11.2898	11.2881	11.1955	10.9283	11.3239	11.3465	11.3051	11.2275	10.9802
PCA_1-005	11.0474	10.7638	10.6399	10.1392	9.11602	11.083	10.8565	10.781	10.2657	9.36766	11.1989	10.9592	10.983	10.575	9.93855	11.2013	11.1208	11.1941	11.105	10.8762	11.225	11.1729	11.2319	11.1431	10.9407	11.2143	11.2447	11.2107	11.2074	10.9363
PCA_1-006	11.0214	10.7193	10.4053	9.3633	8.91559	11.073	10.7521	10.5818	9.57213	9.40822	11.15	10.9387	10.8368	10.4385	9.83379	11.1928	11.1311	11.1486	11.0538	10.8194	11.2001	11.1454	11.2363	11.1509	10.9505	11.1425	11.1694	11.2738	11.2405	10.9439
PCA_1-007	10.8174	10.3472	9.89624	9.32191	8.71015	10.9031	10.6995	9.96694	9.3881	8.7613	11.05	10.9469	10.7791	9.94497	8.78559	11.1506	11.1598	11.175	11.036	10.4717	11.1571	11.1821	11.2565	11.1755	10.8571	11.2031	11.2103	11.2751	11.2592	10.9807
PCA_1-008	10.8281	10.18	9.8634	9.32864	8.73473	10.9012	10.3283	9.9367	9.35236	8.69397	10.9899	10.7297	10.2264	9.69941	8.79065	11.178	11.1015	10.9326	10.8294	10.4511	11.1726	11.1645	11.1001	11.0011	10.8141	11.1306	11.1983	11.1671	11.1317	10.7933
PCA_1-009	10.8175	10.1474	9.94069	9.39888	8.74278	10.9311	10.3029	9.97514	9.41754	8.70535	11.0554	10.514	10.1248	9.68487	8.7929	11.186	10.9707	10.6579	10.4493	9.95927	11.2141	11.1856	11.0768	10.9497	10.6328	11.1602	11.1826	11.2169	11.0801	10.779
PCA_1-010	10.6794	9.94362	9.54252	9.34667	8.74635	10.769	10.0114	9.65469	9.32566	8.72176	10.8689	10.1342	9.75849	9.46298	8.77158	10.9839	10.5822	10.2229	10.0055	9.73712	11.1655	11.1015	10.4929	10.4427	10.2151	11.1656	11.169	10.8168	10.7687	10.8174
PCA_1-011	10.5145	9.90811	9.64222	9.35142	8.76094	10.861	9.96719	9.71529	9.36193	8.67314	10.7997	10.0699	9.76924	9.42665	8.72444	10.7103	10.5509	10.156	9.98061	9.66583	10.8204	10.995	10.4609	10.4494	10.1717	11.1363	11.1851	10.6502	10.7171	10.3686
PCA_1-012	10.5038	9.94122	9.60689	9.38931	8.75218	10.5956	10.0029	9.66806	9.32018	8.68911	10.6707	10.0922	9.85778	9.47293	8.74524	10.7071	10.3459	10.1949	9.97682	9.6543	10.6846	10.5438	10.4644	10.3427	10.1605	10.7444	10.6742	10.6497	10.644	10.3828
PCA_1-013	10.5562	10.02	9.61136	9.33207	8.57927	10.6466	10.0001	9.65724	9.3363	8.47981	10.6777	10.129	9.76067	9.48845	8.68558	10.7108	10.262	10.1616	9.94846	9.67754	10.6722	10.5724	10.5095	10.3901	10.2117	10.6387	10.6187	10.6944	10.61	10.2983
PCA_1-014	10.6017	9.79348	9.55583	9.02233	8.53707	10.6351	9.89388	9.6453	9.36398	8.47733	10.7386	10.0055	9.78645	9.49938	8.6711	10.6284	10.2109	10.1242	10.0106	9.70043	10.625	10.4743	10.2621	10.1829	10.1845	10.5916	10.6534	10.4222	10.3653	10.4502
PCA_1-015	10.5677	9.808	9.53153	9.10589	8.5155	10.5637	9.86992	9.6373	9.26278	8.36095	10.7014	9.96803	9.75401	9.44833	8.63405	10.6597	10.2566	10.1284	9.92505	9.72136	10.6628	10.3983	10.3878	10.2367	10.1907	10.6636	10.514	10.4967	10.3402	10.2821
PCA_1-016	10.3838	9.82578	9.23865	8.91207	8.35604	10.4877	9.91307	9.469	8.85673	8.44073	10.4788	9.9997	9.76074	9.40122	8.56151	10.5598	10.214	10.1287	9.92992	9.7083	10.6782	10.394	10.3661	10.2355	10.1423	10.6785	10.5557	10.5414	10.3192	10.2931
PCA_1-017	10.4052	9.85603	9.28467	8.87909	8.44057	10.4729	9.91667	9.39663	8.92609	8.34998	10.4981	9.90636	9.7135	9.24243	8.59576	10.6142	10.2008	10.1308	9.92472	9.49149	10.647	10.3801	10.3123	10.2459	10.1242	10.5634	10.523	10.4834	10.41	10.2914
PCA_1-018	10.3709	9.87485	9.30435	8.87416	8.33951	10.4749	9.8644	9.37604	8.90057	8.42703	10.5362	9.98211	9.66605	9.27497	8.56582	10.5304	10.2186	10.0896	9.91727	9.545	10.6032	10.4594	10.3335	10.2733	10.1869	10.7007	10.474	10.4241	10.3869	10.3197
PCA_1-019	10.3815	9.74171	9.26441	8.93262	8.3224	10.4908	9.89157	9.38166	8.94048	8.40544	10.5567	9.94068	9.65208	9.24353	8.58661	10.5519	10.285	10.0593	9.97581	9.31399	10.6364	10.4081	10.4063	10.1968	10.1746	10.6339	10.4177	10.4221	10.4756	10.2272
PCA_1-020	10.3512	9.74753	9.12602	8.81331	8.30347	10.5004	9.8435	9.27063	8.9488	8.37922	10.5336	9.96939	9.48915	9.33366	8.60275	10.5233	10.1732	10.1647	9.90309	9.32085	10.6088	10.3294	10.3934	10.2176	10.1335	10.6698	10.4574	10.4196	10.3952	10.2788
PCA_1-021	10.2466	9.79178	9.2951	8.8332	8.34302	10.5077	9.82224	9.3573	8.88812	8.34706	10.5306	9.99715	9.54329	9.25685	8.59297	10.5123	10.1354	10.1039	9.94168	9.38067	10.5521	10.2508	10.3451	10.2713	10.1256	10.6835	10.5098	10.4214	10.368	10.1681
PCA_1-022	10.3297	9.69994	9.24996	8.86219	8.27718	10.4019	9.84107	9.3356	8.88988	8.32053	10.5162	9.93195	9.54544	9.13611	8.66409	10.5723	10.2302	10.1085	9.97238	9.39235	10.6091	10.387	10.3415	10.242	10.0311	10.6003	10.4339	10.4047	10.3685	10.0861
PCA_1-023	10.2945	9.73791	9.27605	8.78729	8.34337	10.3705	9.78458	9.32006	8.89971	8.32914	10.4283	9.93957	9.54669	9.12146	8.57275	10.6077	10.0828	10.0884	9.96503	9.3917	10.5011	10.3321	10.3455	10.3266	9.91076	10.53	10.4247	10.3165	10.4139	10.1515
PCA_1-024	10.2172	9.66302	9.24527	8.84931	8.2672	10.2843	9.73993	9.33313	8.86341	8.37896	10.4324	9.89979	9.51953	9.0591	8.57336	10.6131	10.1489	10.0483	9.75608	9.33641	10.5171	10.4082	10.3177	10.2597	9.96108	10.5542	10.4069	10.4447	10.4204	10.1421
PCA_1-025	10.2731	9.75835	9.29145	8.82461	8.30079	10.2806	9.79897	9.46408	8.78319	8.39148	10.4031	9.79137	9.51666	9.07337	8.56144	10.5224	10.1191	9.91505	9.72507	9.32296	10.4907	10.3978	10.2618	10.2324	9.87446	10.6297	10.5567	10.3092	10.3411	10.161
PCA_1-026	10.1639	9.59403	9.1956	8.77501	8.25731	10.3015	9.7126	9.40417	8.78427	8.38834	10.3895	9.87178	9.52602	9.05138	8.58964	10.4734	10.2027	9.99795	9.78227	9.30822	10.5963	10.3912	10.2145	10.2047	9.91265	10.5042	10.54	10.4322	10.3241	10.194
PCA_1-027	10.0697	9.63547	9.19095	8.83657	8.22809	10.3149	9.70256	9.31266	8.80286	8.44666	10.3297	9.83578	9.54461	9.06626	8.57953	10.4482	10.1214	9.97861	9.70963	9.24811	10.5631	10.4227	10.2531	10.1641	9.73175	10.4964	10.5034	10.3358	10.3615	10.1974
PCA_1-028	10.1593	9.59352	9.0962	8.77913	8.23079	10.2376	9.61486	9.31128	8.83543	8.37303	10.4604	9.74347	9.56207	8.9736	8.58782	10.4072	10.1696	10.0101	9.7166	9.24308	10.5239	10.4369	10.3434	10.1746	9.74115	10.5978	10.4183	10.3431	10.3877	10.2661
PCA_1-029	10.1154	9.47944	9.17703	8.8471	8.25919	10.1068	9.73321	9.3492	8.84584	8.41136	10.2631	9.67069	9.58095	8.994	8.53342	10.5309	10.125	9.97959	9.52291	9.28369	10.5487	10.4737	10.2513	10.1602	9.73813	10.5252	10.4207	10.4842	10.4623	10.0758
PCA_1-030	10.1867	9.53293	9.20692	8.85222	8.22346	10.1084	9.45711	9.18173	8.76793	8.4578	10.3084	9.65674	9.50412	8.96863	8.70243	10.3694	10.2221	9.97263	9.62245	9.20508	10.5609	10.5261	10.2345	10.1445	9.81333	10.4806	10.497	10.3244	10.3735	10.1074
PCA_1-031	10.0133	9.50078	9.17683	8.86222	8.27412	10.0933	9.60394	9.25594	8.75401	8.49856	10.2142	9.73425	9.52232	9.00972	8.63389	10.3679	10.1091	9.88796	9.60367	9.23089	10.4727	10.3704	10.1903	10.0905	9.79338	10.5126	10.5353	10.3994	10.266	10.1923
PCA_1-032	10.0288	9.38429	9.14421	8.90023	8.23487	10.1499	9.67654	9.23826	8.74796	8.40662	10.2083	9.71105	9.54976	8.97001	8.5517	10.3571	10.1545	9.91244	9.54286	9.29552	10.4851	10.3665	10.233	10.1074	9.7399	10.5459	10.5188	10.354	10.3341	10.16
PCA_1-033	10.1167	9.51701	9.17218	8.84801	8.34225	10.2396	9.48375	9.24898	8.80045	8.40405	10.1582	9.77859	9.62147	8.96222	8.5149	10.3032	9.96057	10.0423	9.6707	9.10046	10.5223	10.3776	10.1862	10.1194	9.79505	10.5349	10.4175	10.4014	10.2313	10.1178
PCA_1-034	10.1416	9.53784	9.12933	8.89245	8.30054	10.2415	9.55378	9.24136	8.83754	8.37774	10.2298	9.7444	9.45541	8.92863	8.4333	10.3535	10.0633	9.90036	9.71237	9.1238	10.4489	10.4815	10.258	10.1508	9.69901	10.594	10.5704	10.2871	10.2201	10.1923
PCA_1-035	10.1421	9.54863	9.11642	8.84989	8.39201	10.2228	9.59326	9.14331	8.7912	8.35376	10.1183	9.73382	9.37051	8.98437	8.53747	10.4108	10.1386	9.93588	9.6641	9.11756	10.5437	10.5064	10.2093	10.1662	9.72642	10.4627	10.5963	10.3638	10.315	9.8446
PCA_1-036	10.1276	9.62704	9.09995	8.84776	8.30876	10.1953	9.58389	9.17586	8.80798	8.38796	10.228	9.79055	9.19235	8.93338	8.5083	10.4558	10.0912	9.86653	9.623	9.12432	10.4107	10.2745	10.2358	10.1761	9.63875	10.3422	10.5465	10.4047	10.2579	9.85092
PCA_1-037	10.1503	9.63609	9.15109	8.85985	8.25163	10.1471	9.57576	9.18531	8.83608	8.37254	10.382	9.59752	9.23221	9.02329	8.47394	10.4405	9.97864	9.77484	9.56905	9.15353	10.4545	10.367	10.2188	10.1258	9.7649	10.4907	10.5951	10.339	10.4075	9.77632
PCA_1-038	10.0954	9.635	9.16178	8.88606	8.29041	10.2372	9.61803	9.18264	8.87529	8.33755	10.254	9.60972	9.27509	8.97828	8.44072	10.3922	9.9023	9.65834	9.52539	9.12966	10.4905	10.389	10.2147	10.1317	9.7169	10.4904	10.5185	10.4116	10.2679	9.68304
PCA_1-039	10.0279	9.62817	9.23859	8.83596	8.3398	10.2404	9.58133	9.21788	8.79382	8.2868	10.3646	9.61535	9.30484	9.04726	8.43646	10.4445	9.83847	9.72594	9.56501	9.21358	10.3831	10.338	10.2665	10.129	9.76145	10.4046	10.5593	10.3961	10.3117	9.73585
PCA_1-040	10.0612	9.61641	9.14084	8.7756	8.33405	10.1318	9.66746	9.16203	8.893	8.26015	10.2419	9.6945	9.25795	9.03213	8.46171	10.5405	9.87283	9.71386	9.62217	9.13682	10.4248	10.2239	10.1449	10.1648	9.71505	10.4232	10.4204	10.3232	10.3535	9.7513
PCA_1-041	10.1244	9.65085	9.1497	8.8626	8.35603	10.2119	9.66248	9.21145	8.88172	8.27802	10.4307	9.6812	9.2539	8.85573	8.45716	10.3247	9.90084	9.77904	9.47716	9.11588	10.4538	10.1898	10.0883	10.0554	9.70162	10.3902	10.5239	10.2639	10.3501	9.75092
PCA_1-042	10.0619	9.66949	9.17478	8.90339	8.24331	10.24	9.7034	9.23297	8.97028	8.23006	10.4328	9.59807	9.22133	8.88173	8.47996	10.4502	9.8595	9.70732	9.62947	9.18072	10.4194	10.2968	10.15	10.1626	9.72097	10.4728	10.4947	10.319	10.3476	9.80596
PCA_1-043	10.1199	9.66895	9.16375	8.85133	8.25453	10.2284	9.71504	9.28618	8.91812	8.14832	10.3597	9.6876	9.26844	8.92878	8.57587	10.3925	9.87621	9.71247	9.53218	9.0125	10.4341	10.0485	10.0324	9.94859	9.69758	10.4948	10.4678	10.3262	10.2752	9.70291
PCA_1-044	10.1019	9.68635	9.27824	8.83321	8.34472	10.2142	9.66131	9.2089	8.80756	8.22605	10.2387	9.68079	9.22583	8.93517	8.42346	10.4179	9.82356	9.59724	9.44449	9.09753	10.3869	10.2225	10.0649	10.0499	9.66568	10.4622	10.4564	10.3222	10.3313	9.83697
PCA_1-045	10.1443	9.78853	9.23782	8.8006	8.40243	10.3511	9.55347	9.20446	8.82405	8.35067	10.4157	9.67468	9.22811	9.0547	8.41555	10.4578	9.83552	9.5574	9.37129	9.10297	10.2776	10.0305	9.91543	9.96956	9.65587	10.3581	10.2635	10.2363	10.3185	9.81194
PCA_1-046	10.1306	9.49651	9.20485	8.83433	8.35945	10.1671	9.50376	9.31219	8.93157	8.32819	10.3416	9.67154	9.42014	8.95041	8.45868	10.3496	9.85329	9.63561	9.44884	9.01757	10.4884	10.1018	9.98966	9.92633	9.60846	10.3493	10.222	10.1822	10.1526	9.70551
PCA_1-047	9.99024	9.56125	9.34187	8.92398	8.51641	10.2408	9.57955	9.23826	8.8255	8.29306	10.3435	9.68141	9.14674	8.98303	8.4503	10.5042	9.76669	9.71016	9.37636	9.05187	10.2922	10.1477	9.97059	9.96194	9.55199	10.3481	10.2044	10.3166	10.1183	9.65377
PCA_1-048	10.0848	9.54913	9.24976	8.94285	8.62538	10.2912	9.58152	9.28637	8.91034	8.34197	10.3127	9.50762	9.17644	8.98251	8.42139	10.2073	9.86673	9.71883	9.3197	9.13115	10.3482	10.1517	10.0053	9.91459	9.64674	10.252	10.2812	10.1831	10.1483	9.70748
PCA_1-049	10.2526	9.58	9.30498	8.87851	8.58115	10.1974	9.55169	9.25496	8.86208	8.34967	10.3248	9.46971	9.2754	8.99509	8.42795	10.2774	9.89866	9.72584	9.46677	8.90338	10.3739	9.97673	10.0796	10.0502	9.51905	10.2249	10.1995	10.1889	10.1539	9.68319
PCA_1-050	10.2617	9.59135	9.29543	8.90431	8.44388	10.2286	9.49733	9.30372	8.91394	8.39527	10.285	9.50827	9.23399	8.97972	8.44585	10.2168	9.86405	9.63588	9.44716	8.95602	10.412	10.1031	9.95489	10.0559	9.571	10.2039	10.2649	10.0338	10.234	9.64418
PCA_1-051	10.1438	9.6475	9.30192	8.89797	8.53603	10.1812	9.64082	9.27509	8.79519	8.2773	10.3127	9.54834	9.22398	8.9199	8.54134	10.1767	9.69545	9.66972	9.44445	8.86545	10.2507	10.1249	10.0425	10.0094	9.60123	10.2399	10.1408	10.0903	10.1738	9.79522
PCA_1-052	10.1829	9.63845	9.31556	8.84172	8.56606	10.2549	9.61253	9.21479	8.93081	8.4259	10.3373	9.53173	9.27671	8.91054	8.44608	10.2038	9.76089	9.55263	9.53988	8.86213	10.1986	10.1178	9.97069	10.0386	9.59912	10.3589	10.1784	10.1996	10.1842	9.71353
PCA_1-053	10.1515	9.56412	9.30328	9.05894	8.61026	10.2235	9.69669	9.33861	8.87281	8.45231	10.2126	9.55284	9.23532	8.91906	8.41474	10.19	9.82081	9.56156	9.48022	8.87929	10.2025	10.1992	9.98402	10.0343	9.69941	10.1522	10.1993	10.155	10.1982	9.63956
PCA_1-054	10.2433	9.62946	9.42852	8.89737	8.5306	10.2038	9.74693	9.22076	8.81706	8.41594	10.2061	9.61449	9.3731	8.93693	8.49459	10.0999	9.77127	9.58517	9.50148	9.03299	10.1766	10.0913	10.0407	9.96626	9.61367	10.1254	10.0863	10.1045	10.1777	9.66213
PCA_1-055	10.171	9.6795	9.10614	9.04367	8.48099	10.2226	9.66016	9.21135	8.84786	8.53479	10.1973	9.59139	9.26413	8.99027	8.47234	10.165	9.63331	9.67233	9.46913	9.00273	10.1076	10.1552	10.0293	9.96305	9.57784	10.2279	10.1992	10.1615	10.2078	9.59892
PCA_1-056	10.2284	9.65587	9.28637	8.77938	8.56828	10.162	9.65132	9.25044	8.86966	8.30207	10.209	9.57654	9.28629	8.84351	8.61532	10.0929	9.64244	9.65808	9.43942	9.00606	10.0802	10.0766	10.0535	10.027	9.58128	10.0994	10.1798	10.2689	10.2123	9.67255
PCA_1-057	10.1235	9.5954	9.28834	8.91856	8.59473	10.268	9.48655	9.40947	8.89405	8.36215	10.2403	9.72959	9.2283	8.93128	8.50096	10.0801	9.74328	9.75664	9.49888	9.01761	10.1722	10.031	10.0421	10.1029	9.55735	10.085	10.161	10.0845	10.2656	9.61899
PCA_1-058	10.0369	9.59678	9.26388	8.87347	8.75842	10.1349	9.52686	9.33257	8.82022	8.3854	10.3858	9.67585	9.41666	8.94876	8.57364	10.1057	9.70328	9.69987	9.43377	8.97173	10.0795	10.0481	10.0321	10.1046	9.5649	10.1373	10.19	10.2498	10.1533	9.6197
PCA_1-059	10.2911	9.55802	9.2575	8.96496	8.3927	10.2646	9.50984	9.31335	8.95691	8.43318	10.1709	9.64631	9.50814	8.94109	8.53648	10.1575	9.65197	9.64876	9.51152	8.81303	10.2536	10.0008	10.1349	10.0034	9.47608	10.2628	10.1758	10.1091	10.2983	9.71636
PCA_1-060	10.1942	9.67104	9.21712	8.95713	8.39323	10.2267	9.54505	9.27702	8.80965	8.30619	10.2149	9.67824	9.27576	8.92682	8.52062	10.0885	9.8172	9.63523	9.30672	8.90277	10.163	10.1264	9.92372	10.1104	9.5758	10.0594	10.1815	10.1446	10.2737	9.69174
PCA_1-061	10.1475	9.52593	9.23057	8.96473	8.33734	10.3197	9.46045	9.32815	8.86967	8.35468	10.2262	9.65628	9.37349	8.99429	8.55465	10.0331	9.72976	9.60017	9.4007	8.93546	10.2871	10.2404	9.99464	10.0492	9.54731	10.1925	10.0848	10.1641	10.1903	9.73191
PCA_1-062	10.1253	9.64093	9.31133	8.93947	8.34325	10.1982	9.53633	9.27109	8.85708	8.2371	10.1497	9.76026	9.3666	8.94727	8.61668	10.1267	9.82069	9.62632	9.42169	8.94107	10.1709	10.0132	10.0682	10.0428	9.49237	10.1484	10.1912	10.1324	10.198	9.67907
PCA_1-063	10.0004	9.60508	9.36862	8.97053	8.30559	10.112	9.4794	9.33415	8.97265	8.3634	10.2012	9.58071	9.3215	8.87949	8.50689	10.0295	9.69737	9.71851	9.73913	8.87593	10.161	10.1092	10.123	9.91482	9.49754	10.1829	10.156	10.2106	10.2175	9.6121
PCA_1-064	9.92213	9.55469	9.30613	8.83591	8.26054	10.1462	9.55519	9.40674	8.91348	8.30353	10.1323	9.68053	9.30993	8.93284	8.3763	10.0331	9.85538	9.67138	9.548	8.90656	10.1461	10.1037	9.94346	9.95346	9.46682	10.1044	10.2257	10.1041	10.2325	9.8245
PCA_1-065	10.2156	9.71136	9.31219	9.03865	8.33944	10.0652	9.50615	9.36769	8.93084	8.34697	10.1459	9.52016	9.34907	9.08013	8.5367	10.0865	9.86121	9.75499	9.46758	8.85938	10.1717	10.157	9.95361	9.79703	9.47437	10.2102	10.1324	10.0238	10.1195	9.74085
PCA_1-066	9.983	9.54621	9.21357	8.9167	8.43722	10.0586	9.62974	9.31067	8.87934	8.3765	10.0364	9.4363	9.5436	8.97906	8.48883	10.0763	9.73304	9.65264	9.41792	8.94123	10.2739	10.1254	9.90252	9.88096	9.44185	10.2885	10.2787	10.2829	10.2263	9.6053
PCA_1-067	10.0624	9.50097	9.17117	8.92095	8.47783	9.87838	9.53875	9.36674	9.09434	8.1595	10.116	9.59425	9.45104	9.15307	8.60011	10.1275	9.74668	9.645	9.44776	8.95912	10.279	10.0147	9.94782	9.89186	9.61553	10.3197	10.1181	10.1274	10.1686	9.56271
PCA_1-068	10.0478	9.66089	9.33556	8.8996	8.38597	10.0477	9.60255	9.43025	9.05239	8.32669	10.1905	9.51031	9.38869	9.0375	8.46785	10.149	9.70628	9.73989	9.45484	9.06718	10.1038	10.1263	9.86512	9.89233	9.32492	10.3061	10.1624	10.2145	10.1868	9.6711
PCA_1-069	9.95309	9.57409	9.265	9.06081	8.31523	10.1046	9.70771	9.2919	8.92681	8.42317	10.2101	9.67912	9.22186	9.16192	8.53532	10.2063	9.73213	9.68354	9.4479	8.84713	10.1764	10.0372	10.0496	9.84097	9.4688	10.1674	10.2396	10.3045	10.0755	9.76095
PCA_1-070	10.1141	9.7075	9.32085	9.00706	8.46024	10.1081	9.50088	9.28522	8.86485	8.43854	9.97291	9.57308	9.48401	9.12961	8.61202	10.2923	9.5505	9.67869	9.54595	8.92143	10.1539	10.0877	10.0192	9.82831	9.3196	10.155	10.3406	10.2288	10.1789	9.62879
PCA_1-071	10.0397	9.51385	9.27222	9.07019	8.40666	10.0541	9.62383	9.44232	8.92474	8.21623	10.0891	9.67936	9.45238	9.11339	8.4772	10.0384	9.72491	9.77556	9.47645	8.78903	10.1613	10.0811	9.88145	9.84044	9.36603	10.3193	10.3554	10.1364	10.2582	9.66435
PCA_1-072	10.1217	9.63117	9.3957	9.10921	8.62787	10.0885	9.62958	9.36874	9.01081	8.3664	10.1092	9.7769	9.30718	9.07455	8.64404	10.059	9.71099	9.77869	9.31688	9.00602	10.1461	9.87886	10.0563	9.8033	9.42898	10.2487	10.2535	10.3466	10.1668	9.68108
PCA_1-073	10.0872	9.69729	9.42715	9.09101	8.62551	10.0012	9.61354	9.24364	9.07519	8.41131	10.0537	9.78966	9.34049	9.0684	8.44424	10.2995	9.68637	9.62723	9.3814	8.81949	10.1419	9.91583	9.99503	9.93782	9.53301	10.0589	10.3456	10.2818	10.1478	9.73031
PCA_1-074	9.94943	9.72563	9.26742	9.0417	8.60527	10.1857	9.63425	9.42919	8.85157	8.33453	10.0706	9.65024	9.36604	9.01597	8.48973	10.0476	9.73372	9.63323	9.39931	8.94065	10.078	9.86956	9.87633	9.79448	9.45976	10.1927	10.2188	10.239	10.1378	9.72173
PCA_1-075	10.0719	9.66456	9.29137	9.04784	8.62432	10.1195	9.66494	9.30086	9.09889	8.41017	10.1608	9.69328	9.41727	9.11668	8.49808	10.18	9.84993	9.72015	9.42281	8.92743	10.1748	10.0208	9.94412	9.87641	9.46978	10.1738	10.226	10.2867	10.1428	9.63828
PCA_1-076	10.0553	9.80345	9.16048	8.9959	8.62368	10.1181	9.68928	9.23801	8.94483	8.37448	10.2239	9.59149	9.37549	9.10236	8.52421	10.0464	9.75408	9.73359	9.44953	8.94215	10.1431	9.89879	9.91834	9.93204	9.6146	10.2783	10.2846	10.2712	10.2398	9.69088
PCA_1-077	10.1876	9.69378	9.28642	9.11728	8.61929	10.0249	9.70023	9.2723	8.89674	8.3714	10.2002	9.81153	9.48929	9.08006	8.46811	10.2683	9.62374	9.72133	9.68435	8.9943	10.2266	9.98152	9.98051	9.90844	9.40148	10.2449	10.1897	10.1642	10.1337	9.72728
PCA_1-078	10.2462	9.69665	9.26308	9.12313	8.70695	10.106	9.62849	9.21278	8.96669	8.41795	10.0976	9.56641	9.51302	9.10104	8.44864	10.0974	9.65076	9.59649	9.47795	9.03485	10.2358	10.0526	10.0194	9.81958	9.3953	10.2298	10.154	10.1946	10.3078	9.56354
PCA_1-079	9.99091	9.75487	9.27081	9.04878	8.57883	10.0578	9.78579	9.26245	9.07115	8.54686	10.2398	9.69566	9.52617	9.17648	8.54842	10.1856	9.5838	9.61639	9.45772	9.00309	10.1592	9.82714	10.1045	9.73105	9.38756	10.1963	10.143	10.3551	10.2321	9.65705
PCA_1-080	10.1674	9.85928	9.43613	9.14194	8.64849	10.2204	9.76797	9.34369	9.00886	8.45816	10.0714	9.7632	9.41533	9.19999	8.45002	10.2786	9.66073	9.58697	9.52965	8.90812	10.0419	9.87175	9.94563	9.87561	9.36726	10.1496	10.1971	10.2697	10.2448	9.55814
PCA_1-081	10.0092	9.84062	9.27832	9.03243	8.63703	10.004	9.90257	9.29063	9.07525	8.57207	10.2597	9.65281	9.35738	9.22201	8.52726	10.1848	9.58107	9.73811	9.5298	8.95625	10.1505	9.97795	10.0181	9.83273	9.53541	10.2094	10.1465	10.3317	10.1031	9.72002
PCA_1-082	10.1632	9.79192	9.25679	9.1597	8.63775	10.0886	9.7848	9.32189	9.13428	8.45606	10.242	9.68847	9.37987	9.19791	8.63022	10.1938	9.73337	9.70046	9.51385	8.8516	10.0735	9.91506	10.0172	9.83947	9.35956	10.2262	10.1069	10.2817	10.1381	9.51908
PCA_1-083	10.1877	9.79965	9.35231	9.00052	8.60898	10.1541	9.74116	9.34194	9.05892	8.64059	10.1708	9.72933	9.58099	9.06897	8.56498	10.242	9.74038	9.84399	9.43385	9.13116	10.1995	9.95908	10.0411	9.90354	9.32626	10.1234	10.1837	10.1566	10.1405	9.46508
PCA_1-084	10.0304	9.86778	9.39525	9.10118	8.70979	10.2348	9.66679	9.40126	9.03917	8.40964	10.3505	9.67681	9.4921	9.12516	8.55235	10.2985	9.84945	9.80666	9.46929	8.96539	10.4865	9.9636	9.98014	9.93532	9.33028	10.3032	10.0837	10.1761	10.1386	9.64865
PCA_1-085	10.1656	9.80279	9.21914	9.06301	8.81736	10.1851	9.74725	9.48375	9.21254	8.45379	10.2187	9.69261	9.62195	9.17105	8.51133	10.3666	9.87733	9.84081	9.66558	8.91775	10.1696	10.0715	10.0205	9.72132	9.37815	10.3732	10.3058	10.2001	9.99687	9.63771
PCA_1-086	10.2879	9.81305	9.41633	9.14401	8.83625	10.0777	9.90607	9.35131	9.11268	8.66807	10.2803	9.74994	9.62598	9.18633	8.52156	10.2681	9.79127	9.63677	9.53526	8.92506	10.1712	10.0004	10.0191	9.96853	9.30984	10.3118	10.123	10.2134	10.3258	9.6786
PCA_1-087	10.1777	9.73837	9.40711	9.13168	8.95699	10.2304	9.83256	9.43847	9.0981	8.45491	10.2539	9.71703	9.69581	9.16961	8.64377	10.3676	9.68192	9.6308	9.43445	8.97348	10.234	10.0216	9.95669	9.83617	9.51196	10.2012	10.222	10.25	10.3019	9.49678
PCA_1-088	10.1306	9.80754	9.55502	9.11027	8.78178	10.1928	9.73328	9.61356	9.15215	8.56896	10.1693	9.69576	9.48207	9.24394	8.65282	10.2648	9.57843	9.91045	9.57068	8.94592	10.244	10.0295	10.1806	9.96849	9.41269	10.4565	10.2447	10.1715	10.1676	9.72809
PCA_1-089	10.179	9.7708	9.37859	9.02078	8.91548	10.2895	9.74896	9.42676	9.10202	8.38938	10.233	9.68906	9.54975	9.24995	8.60606	10.2844	9.73032	9.84336	9.56754	9.12467	10.1465	9.98236	9.98417	9.9688	9.22513	10.2299	10.1327	10.2647	10.2282	9.62776
PCA_1-090	10.1183	9.78011	9.47417	9.10135	8.98667	10.3457	9.74794	9.47715	9.15977	8.5546	10.1551	9.64517	9.74479	9.1997	8.59904	10.3594	9.80652	10.0097	9.57688	8.95522	10.3383	10.0747	9.97737	9.94987	9.33218	10.3525	10.2972	10.2498	10.2012	9.59432
PCA_1-091	10.2184	9.8579	9.42882	9.16268	8.87705	10.2479	9.78202	9.34709	9.16187	8.65168	10.2662	9.63068	9.63765	9.31683	8.66522	10.5441	9.90681	9.77178	9.47343	9.15469	10.2178	10.1113	9.86142	9.94641	9.37389	10.2459	10.3233	10.1358	10.1863	9.57659
PCA_1-092	10.1977	9.82351	9.54441	9.15586	8.88409	10.3695	9.69832	9.44894	9.18514	8.70408	10.209	9.72865	9.43018	9.26731	8.65364	10.3529	9.85449	9.83374	9.47189	8.98855	10.2885	10.0603	9.96752	9.86001	9.41874	10.3852	10.2901	10.1358	10.2226	9.56207
PCA_1-093	10.4417	9.87061	9.43933	9.12004	8.93201	10.3771	9.73797	9.42285	9.06464	8.59103	10.3745	9.76697	9.43773	9.18981	8.68651	10.1516	9.77818	9.7546	9.58838	9.15951	10.2999	10.1555	9.99753	9.93242	9.37219	10.3375	10.2241	10.148	9.90448	9.40283
PCA_1-094	10.3491	9.67752	9.58471	9.10466	8.95303	10.3717	9.69299	9.29922	9.16022	8.56654	10.2717	9.77047	9.74733	9.38136	8.68087	10.2386	9.84183	9.73678	9.68242	9.08157	10.3804	10.0125	9.93832	9.82154	9.44192	10.3459	10.4497	10.138	10.1648	9.5362
PCA_1-095	10.2861	9.73542	9.48951	9.05482	9.09551	10.2356	9.81665	9.59695	9.29153	8.63517	10.3025	9.7501	9.46886	9.27219	8.72739	10.2504	9.78758	9.85769	9.58994	9.22838	10.1304	10.0148	9.98014	10.0227	9.50528	10.4265	10.2578	10.0171	10.0746	9.55809
PCA_1-096	10.2319	9.83692	9.45472	9.18621	8.8778	10.3844	9.82451	9.4833	9.0518	8.59778	10.3227	9.80611	9.72967	9.25689	8.70256	10.3147	9.74901	9.94502	9.57114	9.15676	10.1783	10.0861	9.95528	9.91988	9.28837	10.2668	10.4269	10.1074	10.0898	9.7022
PCA_1-097	10.4544	9.89215	9.55081	9.18413	8.97972	10.338	9.69047	9.38435	9.07674	8.5545	10.336	9.64867	9.63819	9.14179	8.64836	10.2936	9.97275	9.70519	9.68856	9.08784	10.3032	9.95117	9.9593	10.0255	9.32801	10.4448	10.1987	10.3113	10.0385	9.65256
PCA_1-098	10.4378	9.77067	9.35388	9.16471	8.84348	10.1638	9.85534	9.4376	9.20787	8.66339	10.3828	9.8486	9.48608	9.36824	8.69097	10.1633	10.0573	9.72896	9.73402	9.15218	10.3297	9.99142	10.0231	9.70734	9.59055	10.3072	10.0892	10.1346	10.0208	9.48256
PCA_1-099	10.1517	9.74449	9.48832	9.31949	8.65011	10.2929	9.84214	9.57515	9.21562	8.67003	10.1284	9.77154	9.67311	9.35448	8.67754	10.1543	9.70109	9.8558	9.72766	9.11602	10.1924	9.93612	10.0132	9.86922	9.37075	10.3351	10.2008	10.2436	9.90709	9.52996
PCA_1-100	10.3147	9.81613	9.39768	9.12221	8.94577	10.3223	9.74106	9.47955	9.28775	8.68473	10.3806	9.80028	9.56184	9.20597	8.63636	10.1996	9.87967	9.85572	9.74393	8.95871	10.369	10.0207	9.85271	9.8183	9.44967	10.5184	10.2136	10.1925	10.1048	9.37138

## Sheet: lambda_0.046416
Row	kernel_0mm_parcels_100	kernel_0mm_parcels_200	kernel_0mm_parcels_400	kernel_0mm_parcels_1000	kernel_0mm_vertex	kernel_5mm_parcels_100	kernel_5mm_parcels_200	kernel_5mm_parcels_400	kernel_5mm_parcels_1000	kernel_5mm_vertex	kernel_10mm_parcels_100	kernel_10mm_parcels_200	kernel_10mm_parcels_400	kernel_10mm_parcels_1000	kernel_10mm_vertex	kernel_20mm_parcels_100	kernel_20mm_parcels_200	kernel_20mm_parcels_400	kernel_20mm_parcels_1000	kernel_20mm_vertex	kernel_30mm_parcels_100	kernel_30mm_parcels_200	kernel_30mm_parcels_400	kernel_30mm_parcels_1000	kernel_30mm_vertex	kernel_40mm_parcels_100	kernel_40mm_parcels_200	kernel_40mm_parcels_400	kernel_40mm_parcels_1000	kernel_40mm_vertex
PCA_1-001	12.2164	12.1241	12.1199	12.0713	11.637	12.3159	12.237	12.2217	12.192	11.9396	12.3398	12.2621	12.267	12.266	12.1118	12.3355	12.282	12.314	12.3215	12.1804	12.3004	12.2456	12.2747	12.3083	12.2025	12.2555	12.2214	12.2552	12.2741	12.1771
PCA_1-002	12.2371	12.1531	12.0986	12.0565	10.8394	12.2992	12.2319	12.2172	12.1857	11.0032	12.4021	12.304	12.2782	12.2937	11.6614	12.3326	12.3089	12.282	12.3345	12.1546	12.2874	12.2591	12.2946	12.3227	12.2065	12.2469	12.2214	12.2265	12.3113	12.1748
PCA_1-003	11.8341	11.3823	10.9725	10.5911	10.8486	11.8172	11.4134	11.0434	10.6042	10.9143	11.789	11.4432	11.1827	10.77	10.9262	11.8058	11.5439	11.3747	11.1266	11.3377	11.7755	11.6096	11.508	11.3174	11.4521	11.8193	11.6034	11.5173	11.4694	11.5247
PCA_1-004	11.0013	10.8055	10.8634	10.552	9.75607	11.1067	10.9572	10.9686	10.6141	9.75239	11.2223	11.1017	11.0553	10.7625	10.0183	11.2668	11.2526	11.2304	11.0961	10.8723	11.329	11.3424	11.3005	11.2044	10.941	11.3374	11.3745	11.3151	11.2206	10.9993
PCA_1-005	11.0354	10.7556	10.6961	10.1663	9.09253	11.1637	10.865	10.7726	10.3238	9.39222	11.1811	11.0046	10.9765	10.6517	9.93637	11.2551	11.1465	11.1956	11.0639	10.8692	11.2175	11.2379	11.2165	11.2402	10.9635	11.21	11.1967	11.2667	11.208	10.9646
PCA_1-006	10.9975	10.6512	10.3815	9.36834	8.94112	11.0965	10.7496	10.5621	9.58905	9.38764	11.1549	10.9703	10.8614	10.5152	9.84253	11.2162	11.1299	11.1388	11.0654	10.8221	11.2111	11.2141	11.2642	11.1406	10.9566	11.1772	11.1777	11.2401	11.2043	10.9233
PCA_1-007	10.7781	10.4103	9.89606	9.34911	8.71995	10.9186	10.7235	10.0131	9.37413	8.76665	11.0967	10.8934	10.7789	9.91646	8.82922	11.1408	11.1188	11.2207	11.0117	10.4577	11.1647	11.1916	11.2806	11.1844	10.8363	11.2238	11.2382	11.2801	11.209	10.9695
PCA_1-008	10.8436	10.2266	9.94536	9.32768	8.76376	10.9288	10.3227	9.95639	9.39592	8.6985	11.0238	10.722	10.253	9.70091	8.81004	11.1232	11.1171	11.0148	10.8139	10.4366	11.1614	11.2165	11.1333	11.0238	10.8027	11.2169	11.2168	11.2176	11.1402	10.7719
PCA_1-009	10.8496	10.2309	9.92399	9.35135	8.74231	10.9254	10.3021	10.0157	9.37749	8.73872	11.0739	10.4804	10.1973	9.65615	8.81068	11.166	10.9513	10.6132	10.5204	9.93468	11.1634	11.238	11.0788	11.0109	10.6764	11.207	11.2537	11.2124	11.1775	10.8206
PCA_1-010	10.8287	9.95994	9.55893	9.31787	8.80428	10.7413	10.0526	9.69889	9.35149	8.75872	10.8881	10.0837	9.88423	9.47097	8.79754	11.0637	10.5916	10.2076	10.0115	9.70801	11.236	11.0615	10.4871	10.44	10.2576	11.1677	11.2103	10.8198	10.8827	10.8009
PCA_1-011	10.5356	9.92314	9.56929	9.35579	8.76604	10.817	10.0119	9.66102	9.38597	8.67793	10.8205	10.04	9.79383	9.48027	8.78246	10.7009	10.4843	10.1843	9.97599	9.68601	10.7673	11.0508	10.535	10.4174	10.194	11.1007	11.1511	10.6672	10.7885	10.3802
PCA_1-012	10.5295	9.91981	9.65866	9.41323	8.75865	10.634	9.9757	9.67103	9.36437	8.69757	10.7236	10.1351	9.80273	9.52265	8.76673	10.6875	10.3477	10.1805	9.98286	9.67251	10.687	10.562	10.5153	10.4562	10.1923	10.7446	10.686	10.7197	10.5629	10.3407
PCA_1-013	10.5524	9.93932	9.58433	9.34046	8.59652	10.6252	9.98617	9.65177	9.34721	8.46846	10.7122	10.0986	9.82632	9.52874	8.70362	10.7039	10.2993	10.2225	9.95018	9.69259	10.7207	10.5724	10.4352	10.355	10.2107	10.689	10.6484	10.6928	10.6646	10.3856
PCA_1-014	10.6301	9.84731	9.59016	9.08212	8.53843	10.663	9.86859	9.60378	9.37542	8.51668	10.6676	9.98178	9.78224	9.48799	8.70052	10.6409	10.1695	10.084	9.99713	9.70681	10.6395	10.4663	10.3167	10.168	10.2099	10.5856	10.6416	10.4322	10.3464	10.428
PCA_1-015	10.5928	9.85427	9.55459	9.11242	8.5401	10.5729	9.91201	9.59248	9.22602	8.39292	10.7358	9.92427	9.75055	9.47943	8.63349	10.6914	10.2526	10.0598	9.961	9.70758	10.6294	10.3696	10.3565	10.2359	10.1497	10.666	10.5038	10.4421	10.4103	10.3924
PCA_1-016	10.4217	9.89997	9.28926	8.88609	8.4081	10.4364	9.92755	9.42486	8.88442	8.45122	10.5312	9.96491	9.80851	9.42162	8.57231	10.5927	10.2377	10.0627	9.92168	9.7131	10.614	10.3989	10.3659	10.2949	10.1118	10.6908	10.5529	10.4834	10.4059	10.3494
PCA_1-017	10.4254	9.86619	9.32003	8.9317	8.47073	10.4655	9.90693	9.35252	8.91121	8.3344	10.5615	10.0225	9.75735	9.30891	8.62296	10.6187	10.1913	10.1365	9.93675	9.61751	10.6101	10.3424	10.4055	10.2509	10.1719	10.6381	10.5741	10.5024	10.5137	10.3397
PCA_1-018	10.4487	9.86283	9.30901	8.9482	8.36643	10.5318	9.92569	9.33165	8.94489	8.38297	10.513	9.95582	9.68349	9.25486	8.58418	10.5697	10.2365	10.0954	9.94954	9.59912	10.5603	10.4294	10.3692	10.2463	10.1512	10.6803	10.4879	10.4395	10.3663	10.4166
PCA_1-019	10.4188	9.8103	9.29339	8.83222	8.36895	10.529	9.92674	9.39975	8.89324	8.41412	10.5484	10.0363	9.71219	9.29626	8.57454	10.4992	10.1981	10.1148	9.95172	9.30637	10.5879	10.4342	10.3008	10.2838	10.1555	10.6445	10.4153	10.4788	10.3471	10.2654
PCA_1-020	10.3397	9.81502	9.21802	8.8651	8.28352	10.43	9.92313	9.31964	8.97535	8.40382	10.5602	10.0995	9.56238	9.2649	8.62812	10.5392	10.1818	10.0416	9.96985	9.27892	10.5822	10.4152	10.3463	10.2676	10.1825	10.6145	10.4919	10.4275	10.3153	10.3007
PCA_1-021	10.3254	9.80297	9.15448	8.86212	8.30088	10.4606	9.8925	9.2741	8.97474	8.35737	10.5626	10.0183	9.63044	9.2345	8.62979	10.5199	10.1977	10.1374	9.8918	9.35833	10.6199	10.3154	10.2688	10.2559	10.1532	10.6244	10.4135	10.3833	10.3569	10.1629
PCA_1-022	10.2737	9.72681	9.22221	8.85651	8.34422	10.3853	9.75301	9.35418	8.95326	8.3699	10.5953	9.96718	9.50902	9.1782	8.60604	10.607	10.2089	10.1483	10.0005	9.29919	10.6084	10.2904	10.3295	10.2825	9.96856	10.5844	10.4031	10.3581	10.3547	10.1592
PCA_1-023	10.3489	9.73121	9.25489	8.90323	8.33438	10.4243	9.82902	9.33476	8.89308	8.34594	10.5313	9.88408	9.5362	9.10316	8.57813	10.5985	10.1572	9.99415	9.9893	9.36937	10.5864	10.4399	10.3889	10.3527	9.94453	10.54	10.4644	10.4211	10.3962	10.1828
PCA_1-024	10.2132	9.64805	9.31301	8.80427	8.32113	10.2927	9.74941	9.32407	8.85416	8.34681	10.5504	9.86667	9.59751	9.04713	8.57229	10.521	10.1785	9.91905	9.73162	9.37918	10.6061	10.3512	10.374	10.2135	9.96324	10.5275	10.4698	10.4128	10.3682	10.1171
PCA_1-025	10.2037	9.73311	9.25669	8.82256	8.20231	10.2077	9.75995	9.36851	8.7869	8.39665	10.3629	9.80441	9.48909	9.06151	8.66331	10.5284	10.1528	9.94043	9.74275	9.28988	10.5417	10.3745	10.2634	10.1891	9.92579	10.4933	10.4512	10.3715	10.4375	10.2501
PCA_1-026	10.232	9.62998	9.19141	8.73567	8.25228	10.3259	9.79045	9.24007	8.73087	8.45581	10.3777	9.94439	9.47603	9.03632	8.54765	10.3918	10.1914	9.9927	9.67497	9.31405	10.5291	10.355	10.2543	10.2181	9.83293	10.5799	10.4586	10.3623	10.5142	10.2269
PCA_1-027	10.1328	9.62752	9.22974	8.84168	8.28071	10.2826	9.63826	9.29708	8.85697	8.40189	10.3227	9.84675	9.61419	8.98612	8.62542	10.4911	10.1328	10.0427	9.65074	9.34247	10.5038	10.3671	10.2201	10.2118	9.72244	10.4702	10.5176	10.4363	10.3772	10.2505
PCA_1-028	10.1939	9.62468	9.22337	8.73298	8.30543	10.2207	9.64168	9.35051	8.93091	8.36517	10.39	9.71164	9.5707	8.93423	8.65096	10.4838	10.1977	9.92827	9.74978	9.27124	10.5509	10.3166	10.2181	10.2739	9.6627	10.5938	10.5123	10.3454	10.3886	10.2517
PCA_1-029	10.1799	9.54289	9.24628	8.82314	8.31899	10.1772	9.69049	9.25921	8.84305	8.39589	10.2691	9.7797	9.46732	9.01313	8.595	10.5678	10.1214	10.0633	9.63101	9.28373	10.6044	10.3869	10.3032	10.2186	9.70942	10.5646	10.5052	10.3278	10.5237	10.2191
PCA_1-030	10.1697	9.52351	9.18674	8.79559	8.39312	10.0985	9.53925	9.35694	8.82949	8.48973	10.3207	9.61539	9.48588	9.00749	8.61344	10.4441	10.2625	9.98221	9.61921	9.2449	10.5286	10.4509	10.2638	10.1492	9.79405	10.5543	10.482	10.4643	10.334	10.0693
PCA_1-031	10.1869	9.45739	9.23334	8.87352	8.28857	10.202	9.65128	9.27613	8.81441	8.48325	10.2323	9.71898	9.55073	9.08257	8.61369	10.3401	10.1865	9.91797	9.69471	9.25239	10.5353	10.4158	10.2097	10.0479	9.73066	10.4617	10.464	10.3406	10.372	10.0896
PCA_1-032	10.1583	9.56289	9.18039	8.86433	8.33618	10.087	9.60295	9.28751	8.82943	8.41299	10.2498	9.67026	9.54503	8.97024	8.6533	10.4002	10.1927	10.038	9.69106	9.17366	10.4992	10.3467	10.1781	10.1342	9.8362	10.5397	10.4679	10.3931	10.3099	10.1055
PCA_1-033	10.0959	9.5848	9.19608	8.86452	8.22792	10.1852	9.56481	9.27478	8.89442	8.39845	10.161	9.70152	9.42554	9.00457	8.56416	10.3834	10.0559	9.91909	9.64748	9.16108	10.4233	10.4247	10.194	10.1088	9.67804	10.615	10.5126	10.4703	10.3126	10.2305
PCA_1-034	10.1152	9.58927	9.17453	8.89467	8.31976	10.1091	9.61976	9.18906	8.73214	8.39516	10.2246	9.69176	9.53904	8.86865	8.53327	10.3966	10.0723	10.0669	9.64051	9.08846	10.5281	10.4903	10.3296	10.0626	9.75278	10.5939	10.5781	10.3397	10.3613	10.129
PCA_1-035	10.0682	9.61608	9.2353	8.85196	8.32532	10.1144	9.58276	9.25784	8.82144	8.32873	10.293	9.63083	9.36505	8.88805	8.50633	10.3889	10.0161	9.968	9.64752	9.1503	10.3929	10.4914	10.2567	9.98729	9.76659	10.4952	10.5568	10.4435	10.3944	9.85133
PCA_1-036	10.0845	9.52413	9.21665	8.8563	8.20933	10.1093	9.56069	9.26361	8.81816	8.44368	10.2875	9.67412	9.25509	8.9635	8.49457	10.4281	10.0131	9.75766	9.63154	9.15484	10.4715	10.3289	10.2737	10.0923	9.70477	10.4821	10.5181	10.4814	10.3249	9.8012
PCA_1-037	9.97921	9.64332	9.06972	8.88237	8.31136	10.1108	9.61591	9.19142	8.80802	8.43433	10.2097	9.61465	9.2865	9.01665	8.51657	10.5122	10.0578	9.74512	9.52463	9.15828	10.4866	10.4746	10.2921	10.0936	9.71588	10.4053	10.4961	10.3522	10.3079	9.79419
PCA_1-038	10.0567	9.56781	9.2232	8.85874	8.42055	10.0838	9.64994	9.22722	8.94465	8.42651	10.2414	9.61536	9.23362	9.05032	8.51243	10.444	9.93212	9.71102	9.61644	9.15515	10.3051	10.3096	10.2167	10.1157	9.70628	10.4356	10.4947	10.4716	10.3238	9.85519
PCA_1-039	10.0245	9.5684	9.16113	8.90321	8.29845	10.1782	9.58196	9.21529	8.90898	8.36005	10.3042	9.68652	9.31834	8.96763	8.44827	10.4315	9.81645	9.70739	9.62885	9.18102	10.3468	10.4064	10.2071	10.2629	9.73827	10.3923	10.5137	10.3922	10.3327	9.73806
PCA_1-040	10.1585	9.7017	9.15524	8.91492	8.26752	10.1717	9.55661	9.1968	8.83389	8.35339	10.2973	9.64517	9.25695	8.99713	8.51115	10.5013	9.82896	9.7792	9.58157	9.15954	10.3828	10.1508	10.1405	10.0226	9.71171	10.4536	10.4892	10.3356	10.3062	9.75345
PCA_1-041	10.1953	9.64145	9.22287	8.91695	8.39077	10.27	9.64407	9.28599	8.94985	8.30988	10.3544	9.67119	9.28415	8.98501	8.54199	10.3564	9.93299	9.67919	9.5893	9.18511	10.2844	10.1289	10.1275	10.0798	9.7108	10.3588	10.4645	10.3509	10.3575	9.68552
PCA_1-042	10.1759	9.6383	9.23302	8.87536	8.27013	10.1921	9.57578	9.249	8.87714	8.27228	10.2943	9.7237	9.1944	8.97203	8.54612	10.331	9.95088	9.65045	9.65057	9.24821	10.4269	10.2739	10.082	10.1542	9.58724	10.3869	10.5246	10.319	10.4364	9.7249
PCA_1-043	10.1846	9.61331	9.26064	8.83748	8.34043	10.2637	9.71572	9.26592	8.86455	8.31869	10.3981	9.77053	9.28741	8.9316	8.58302	10.3393	9.8372	9.66236	9.52414	9.06946	10.3472	10.2518	10.0628	10.0005	9.68561	10.4062	10.4103	10.401	10.4101	9.74328
PCA_1-044	10.1367	9.63228	9.33282	8.92303	8.4057	10.2609	9.67861	9.16921	8.81943	8.19446	10.2853	9.62781	9.2773	8.9202	8.54155	10.4098	9.82193	9.6117	9.5485	8.99465	10.319	10.2032	10.1399	9.94811	9.55644	10.4246	10.4769	10.3151	10.314	9.91568
PCA_1-045	10.1749	9.77403	9.2415	8.87363	8.4603	10.3194	9.60585	9.32935	8.93339	8.25672	10.3888	9.54346	9.25907	8.96173	8.45297	10.408	9.89437	9.61775	9.46644	9.12139	10.2712	10.0262	10.032	9.90859	9.64675	10.4561	10.3165	10.2326	10.1342	9.77695
PCA_1-046	10.177	9.54321	9.2579	8.87262	8.58017	10.164	9.64142	9.17986	8.85686	8.27644	10.3539	9.62769	9.31792	8.97536	8.35992	10.4531	9.95782	9.59737	9.50019	9.00415	10.4007	10.0047	10.029	9.83866	9.65703	10.3193	10.2013	10.2619	10.1254	9.68388
PCA_1-047	10.1853	9.68928	9.35028	9.01913	8.49997	10.3233	9.53475	9.29901	8.9668	8.3606	10.2742	9.64201	9.18332	8.98324	8.42405	10.2904	9.79471	9.56423	9.38865	9.11579	10.3352	10.1097	10.0247	9.86514	9.52947	10.2937	10.2555	10.1997	10.1034	9.7046
PCA_1-048	10.1603	9.63659	9.33631	8.82867	8.49048	10.1816	9.59548	9.28484	8.90168	8.16627	10.2722	9.6208	9.23712	8.99168	8.48449	10.2204	9.8344	9.68037	9.44189	9.02206	10.4813	10.1636	10.0556	9.85996	9.51173	10.2468	10.1993	10.1933	10.0456	9.68239
PCA_1-049	10.1994	9.55457	9.36565	8.98886	8.51386	10.2843	9.67531	9.23896	8.86402	8.29314	10.3576	9.57587	9.20071	8.96327	8.40864	10.2948	9.86722	9.59576	9.40716	8.97638	10.3683	10.0386	9.94922	10.1368	9.55944	10.25	10.2603	10.2306	10.1078	9.65405
PCA_1-050	10.2182	9.63743	9.32004	8.80455	8.4678	10.2462	9.63169	9.35014	8.78557	8.39276	10.1961	9.60151	9.36977	9.05828	8.47394	10.2254	9.70411	9.60389	9.39435	9.02068	10.3088	10.1629	9.95936	10.0098	9.64942	10.2339	10.1592	10.1319	10.2963	9.59765
PCA_1-051	10.0457	9.63628	9.30443	8.86197	8.42305	10.1421	9.59031	9.26146	8.88461	8.41894	10.1222	9.6233	9.3407	8.95313	8.49024	10.1997	9.63846	9.70908	9.40833	9.00566	10.1659	10.1784	10.0436	10.0374	9.5598	10.2245	10.278	10.0304	10.119	9.64919
PCA_1-052	10.1476	9.58666	9.41798	8.80154	8.45452	10.3682	9.58452	9.34741	8.72248	8.301	10.2356	9.554	9.2535	8.94998	8.52826	10.2466	9.79006	9.69604	9.47521	8.93221	10.1497	10.1868	9.94583	10.0583	9.57853	10.2504	10.1455	10.0848	10.1441	9.68788
PCA_1-053	10.1951	9.65591	9.42061	8.93051	8.58006	10.215	9.56895	9.29022	8.944	8.26735	10.1811	9.7174	9.2639	8.86903	8.45181	10.1192	9.76539	9.48807	9.53113	8.93281	10.2198	10.0632	10.0842	9.95564	9.69537	10.1343	10.2134	10.0953	10.1858	9.63712
PCA_1-054	10.0376	9.64636	9.27059	8.92192	8.65468	10.277	9.64773	9.27887	8.85194	8.46788	10.2604	9.59546	9.32812	9.08603	8.45513	10.0675	9.69594	9.60628	9.43499	8.96712	10.045	10.0503	9.86737	9.9133	9.58686	10.1875	10.125	10.1367	10.1849	9.59117
PCA_1-055	10.0885	9.61401	9.20288	8.90186	8.43399	10.2317	9.60557	9.22185	8.75705	8.44046	10.1857	9.65319	9.34567	8.95629	8.47605	10.1356	9.67261	9.49268	9.42261	8.9661	10.1336	9.98955	10.1653	10.085	9.48831	10.1355	10.2199	10.0842	10.1083	9.64748
PCA_1-056	10.0715	9.69105	9.16711	8.90683	8.50159	10.2106	9.58942	9.24641	8.82091	8.30204	10.1894	9.53769	9.33375	8.93732	8.48727	10.0276	9.68527	9.59543	9.54401	9.07939	10.1325	10.0116	9.96496	10.0659	9.54426	10.1333	10.1939	10.175	10.127	9.58562
PCA_1-057	10.1656	9.50139	9.21627	8.89717	8.5135	10.2114	9.53247	9.27633	8.86236	8.40572	10.2292	9.61061	9.28432	8.94317	8.45362	10.1458	9.6947	9.53957	9.43294	8.93208	10.0817	9.95859	10.0161	10.0552	9.63584	10.1315	10.1238	10.0679	10.1144	9.56125
PCA_1-058	10.1869	9.48948	9.17685	8.93019	8.51884	10.1946	9.54362	9.31259	8.7485	8.42432	10.2942	9.6764	9.31049	8.92377	8.49661	10.1963	9.79856	9.5191	9.59144	8.83826	10.0885	10.0253	9.99161	10.0841	9.52821	10.2086	10.3167	10.1127	10.22	9.55884
PCA_1-059	10.33	9.59019	9.20714	8.88084	8.33749	10.2324	9.44775	9.17398	8.88485	8.42982	10.2428	9.57926	9.25835	8.93438	8.52897	10.0765	9.76784	9.58146	9.31477	8.90592	10.1255	10.0735	10.0359	10.1149	9.55099	10.1471	10.0601	10.1594	10.3393	9.76254
PCA_1-060	10.0876	9.54771	9.1921	8.9628	8.22545	10.2452	9.56771	9.31835	8.74423	8.42806	10.2142	9.69425	9.37795	9.04117	8.48963	10.1013	9.74411	9.59886	9.42307	8.84532	10.2005	10.0087	10.0423	10.1004	9.5476	10.2314	10.1902	10.2433	10.1214	9.688
PCA_1-061	10.1212	9.6551	9.27862	8.96228	8.36348	10.1386	9.5852	9.39529	8.92408	8.24233	10.056	9.52924	9.38248	8.89023	8.61887	10.0465	9.71993	9.5721	9.52761	8.91574	10.2223	10.0446	9.9258	10.008	9.43399	10.0829	10.1474	10.1458	10.1052	9.71984
PCA_1-062	10.0893	9.51174	9.2981	8.95833	8.28953	10.1735	9.54532	9.26578	8.81161	8.29628	10.1349	9.49879	9.38672	8.88365	8.50673	9.99551	9.81284	9.62542	9.47958	8.89923	10.1867	10.0334	10.0819	10.0199	9.48686	10.1835	10.2912	10.315	10.221	9.61774
PCA_1-063	10.0125	9.66342	9.27395	8.86072	8.19475	10.1803	9.54906	9.31547	8.75605	8.29126	10.194	9.6004	9.4712	9.00599	8.49789	10.0655	9.77775	9.5734	9.47332	8.89804	10.2128	10.1573	9.96724	9.98958	9.49611	10.1656	10.0352	10.2749	10.0889	9.60938
PCA_1-064	10.0807	9.65934	9.31395	8.92547	8.3584	10.0895	9.57176	9.30742	8.92103	8.33017	10.1064	9.68418	9.42241	8.94185	8.48206	10.1804	9.75579	9.64739	9.43703	8.85687	10.0898	10.1369	10.0454	9.99482	9.44108	10.1759	10.1016	10.1602	10.1571	9.63425
PCA_1-065	9.97248	9.6342	9.33465	9.002	8.34373	10.0277	9.62617	9.34968	8.87085	8.25606	10.0852	9.60726	9.36784	9.06899	8.58061	10.0856	9.75949	9.64448	9.44126	8.91626	10.0913	10.0874	9.96528	9.80906	9.50728	10.1367	10.0773	10.1929	10.1248	9.53546
PCA_1-066	9.98505	9.61658	9.20443	8.90515	8.40516	10.1213	9.59036	9.24269	9.01728	8.29381	10.0152	9.61363	9.40923	8.99226	8.49902	10.2548	9.63971	9.63533	9.4766	8.96993	10.2085	10.0305	9.91034	9.80238	9.35177	10.134	10.228	10.1841	10.1983	9.57949
PCA_1-067	10.0909	9.61989	9.2467	8.978	8.50146	10.0139	9.60218	9.43815	8.89424	8.39554	10.1056	9.55497	9.42784	9.0422	8.49778	10.2382	9.72405	9.66175	9.40605	8.92694	10.1989	10.1206	10.0492	10.0716	9.41304	10.3294	10.2195	10.1187	10.1513	9.67696
PCA_1-068	10.1318	9.61354	9.2812	9.05461	8.41291	10.0796	9.63757	9.27975	8.9703	8.43512	10.2546	9.64757	9.4195	9.01358	8.57236	10.1381	9.71481	9.66188	9.40133	8.93969	10.1096	10.0561	9.96828	9.98995	9.3409	10.2521	10.3009	10.1818	10.201	9.70973
PCA_1-069	10.0916	9.67575	9.24102	8.94451	8.47342	10.0078	9.68679	9.2068	8.92132	8.34553	10.2648	9.54559	9.38195	9.06883	8.60513	10.0371	9.73876	9.56247	9.41067	8.89356	10.2296	10.0422	9.97588	9.87857	9.2167	10.2037	10.3253	10.251	10.1483	9.65771
PCA_1-070	9.97748	9.62871	9.21868	9.00474	8.39497	10.0484	9.51986	9.39995	8.91168	8.32636	10.0976	9.67165	9.38745	9.27238	8.46128	10.1542	9.69143	9.72499	9.4762	8.95041	10.2976	10.0326	9.98669	9.96996	9.30807	10.3509	10.2365	10.1255	10.3089	9.72841
PCA_1-071	9.93052	9.71545	9.48448	8.87776	8.68695	10.0351	9.58263	9.28563	8.93803	8.2925	10.0637	9.72152	9.41572	9.15965	8.4929	10.1293	9.64798	9.58537	9.40751	8.97589	10.2729	9.99051	10.0489	9.81503	9.43742	10.1763	10.2888	10.2396	10.2036	9.74857
PCA_1-072	10.0976	9.68978	9.32113	8.97614	8.68497	10.1053	9.44421	9.30431	8.89669	8.36665	10.092	9.63785	9.4105	8.9958	8.54293	10.2008	9.76261	9.72488	9.45181	8.95838	10.1771	9.77421	9.99058	9.62833	9.29343	10.3117	10.368	10.1944	10.1514	9.52691
PCA_1-073	10.0878	9.59435	9.30868	8.93053	8.53864	10.0951	9.58639	9.39498	8.90366	8.30734	10.1028	9.66505	9.25735	9.03097	8.40396	10.0064	9.66961	9.52278	9.28273	8.91982	9.96962	10.083	10.0467	9.83	9.42355	10.3066	10.1997	10.2201	10.3145	9.68542
PCA_1-074	10.2407	9.61238	9.32225	9.10083	8.51765	9.96648	9.55859	9.34199	8.89872	8.29967	10.1584	9.52225	9.31231	9.0777	8.47617	10.196	9.71767	9.7194	9.5088	8.89934	10.2286	9.8572	10.0695	9.92596	9.58066	10.2028	10.1726	10.2124	10.1428	9.59558
PCA_1-075	10.0744	9.77954	9.40615	8.94936	8.30273	10.0596	9.62404	9.33293	9.02147	8.36665	10.1335	9.6223	9.43522	9.00638	8.53366	10.0428	9.69128	9.57409	9.48561	8.99605	10.0345	9.89945	9.96176	9.79939	9.46334	10.0979	10.3206	10.324	10.2153	9.65765
PCA_1-076	10.1489	9.74784	9.10993	9.0983	8.54685	10.0109	9.68164	9.17616	9.10105	8.40911	10.0744	9.65532	9.3918	9.11504	8.53321	10.1532	9.74642	9.53208	9.47606	8.94478	10.1065	9.92914	9.88489	9.83973	9.40747	10.2643	10.1349	10.2475	10.2144	9.69868
PCA_1-077	10.0525	9.73213	9.20724	9.07478	8.54449	10.0771	9.83712	9.13998	9.09443	8.41927	10.2604	9.52209	9.41196	9.13541	8.42211	10.0878	9.73484	9.74366	9.57424	8.96	10.0733	9.86868	10.1199	9.80427	9.42289	10.1666	10.2496	10.241	10.197	9.56267
PCA_1-078	10.1218	9.72267	9.28823	9.04236	8.71349	10.0661	9.76702	9.27534	9.02241	8.33831	10.2279	9.55343	9.35674	9.00112	8.45128	10.2675	9.74257	9.66681	9.54544	8.94838	10.1685	9.9122	9.91258	9.81314	9.33989	10.2664	10.1494	10.4026	10.2251	9.56307
PCA_1-079	9.94921	9.65985	9.48408	9.09686	8.52838	10.0108	9.71508	9.26204	9.01778	8.44414	10.2048	9.72635	9.30813	9.23449	8.48601	10.1337	9.67115	9.63902	9.52756	8.93055	10.3184	9.98986	9.94212	9.86741	9.44314	10.265	10.217	10.4398	10.0871	9.63663
PCA_1-080	9.9751	9.78349	9.36335	9.10329	8.48433	10.112	9.57051	9.33203	9.02686	8.42083	10.171	9.65425	9.34078	9.18128	8.5579	10.0902	9.71595	9.59441	9.48671	8.92314	10.11	10.028	10.1023	9.87103	9.40037	10.2694	10.1577	10.2779	10.0876	9.5885
PCA_1-081	10.0576	9.82176	9.28145	9.16503	8.83695	10.0168	9.69971	9.19942	9.06599	8.51624	10.1473	9.6266	9.35219	9.06522	8.50716	10.2472	9.64679	9.72917	9.34364	8.89018	10.1919	9.9805	9.97422	9.76494	9.44518	10.2223	10.1829	10.2096	10.0968	9.57478
PCA_1-082	10.0843	9.73625	9.34997	9.0472	8.65297	10.1209	9.89008	9.32336	8.91264	8.31331	10.2081	9.71989	9.47749	9.12275	8.5839	10.1116	9.72382	9.63669	9.41688	8.91093	10.023	9.9696	9.9831	9.89319	9.47135	10.2353	10.1292	10.0897	10.162	9.61464
PCA_1-083	10.1599	9.69733	9.18674	9.18689	8.72384	10.028	9.77502	9.44859	9.11623	8.39863	10.0772	9.6568	9.36446	9.15059	8.46277	10.1911	9.77081	9.70416	9.48941	8.89452	10.1508	10.0148	10.082	9.88894	9.37332	10.1441	10.0201	10.0521	10.0106	9.53144
PCA_1-084	10.0833	9.88132	9.36146	9.00945	8.68486	10.0813	9.81083	9.27442	8.99687	8.43339	10.167	9.66972	9.50656	9.2723	8.46468	10.2822	9.83338	9.87373	9.52499	8.94828	10.2434	9.96199	9.89257	9.81226	9.3556	10.2627	10.1604	10.1448	10.262	9.63715
PCA_1-085	10.1583	9.82674	9.54789	9.23544	8.52477	10.1938	9.80456	9.36847	9.13113	8.45127	10.1757	9.68906	9.48442	9.14252	8.64933	10.1519	9.86664	9.77893	9.52117	8.94138	10.3421	9.97943	9.85601	9.87466	9.30231	10.1797	10.2177	10.1866	10.1932	9.57678
PCA_1-086	10.1818	9.69022	9.51685	9.00087	8.6224	10.1942	9.8303	9.43307	9.04834	8.47329	10.1639	9.75289	9.47805	9.11071	8.57689	10.1555	9.65538	9.80004	9.41952	9.0073	10.0661	10.042	9.95207	9.99988	9.30009	10.3023	10.0885	10.1248	10.1096	9.56961
PCA_1-087	10.0842	9.78577	9.30475	9.30384	8.60028	10.1273	9.68481	9.41902	9.02841	8.47041	10.2469	9.79658	9.40525	9.09692	8.54275	10.4413	9.58269	9.65335	9.52757	8.99971	10.1958	10.096	10.0871	9.87015	9.33973	10.2513	10.3312	10.3069	10.0621	9.50938
PCA_1-088	10.279	9.87386	9.36586	9.04806	8.62869	10.1513	9.70961	9.41517	9.04359	8.55799	10.1837	9.87355	9.57464	9.30979	8.57982	10.1972	9.66599	9.78927	9.45898	8.99754	10.3269	10.0766	9.99528	9.93326	9.31416	10.2068	10.1119	10.2508	10.1456	9.59194
PCA_1-089	10.1591	9.6357	9.30742	9.20122	8.72073	10.2468	9.93031	9.48793	9.20197	8.51284	10.347	9.69771	9.47177	9.17233	8.66486	10.3162	9.66637	9.83702	9.5879	9.07503	10.3278	10.0566	10.0944	9.96421	9.46485	10.2455	10.1505	10.1955	10.217	9.60696
PCA_1-090	10.2726	9.80987	9.40469	9.09952	8.61095	10.2085	9.79958	9.48271	9.0843	8.5479	10.4131	9.65135	9.61456	9.06917	8.70317	10.2489	9.78605	9.84536	9.74838	9.03004	10.3834	10.1676	9.98796	9.89228	9.44238	10.1792	10.2547	10.0021	10.2471	9.50643
PCA_1-091	10.1181	9.91257	9.25044	9.15295	8.88544	10.2821	9.71484	9.39891	9.09347	8.59342	10.4393	9.76662	9.40408	9.0489	8.57974	10.2068	9.71167	9.88947	9.62558	9.01158	10.3364	10.1147	9.82705	9.91213	9.40278	10.2165	10.4189	10.1276	10.2504	9.63995
PCA_1-092	10.3044	9.81133	9.43797	9.1963	8.86895	10.3177	9.70583	9.4348	9.16574	8.65708	10.3695	9.76509	9.57444	9.1699	8.65295	10.2617	9.79741	9.72752	9.68391	9.0914	10.0729	10.0003	9.87618	9.91674	9.41941	10.2933	10.2929	10.0764	10.1277	9.6305
PCA_1-093	10.34	9.88753	9.45262	9.20545	8.71291	10.2521	9.77434	9.43953	9.25909	8.6088	10.3051	9.78323	9.50475	9.33331	8.65704	10.1804	9.9406	9.82029	9.72517	8.99827	10.2176	9.93508	9.9008	9.82801	9.29929	10.3568	10.1864	10.133	10.1446	9.49388
PCA_1-094	10.2037	9.76859	9.43476	9.0585	8.86113	10.32	9.70108	9.46609	9.16874	8.64463	10.2109	9.67955	9.63637	9.15672	8.77787	10.1249	9.78436	9.76726	9.62598	8.95976	10.2706	10.0765	9.90672	9.82833	9.34565	10.363	10.2904	9.99934	10.0628	9.61726
PCA_1-095	10.443	9.78057	9.41014	9.07233	8.78626	10.4292	9.85412	9.42703	9.01135	8.61579	10.1403	9.58958	9.52508	9.20995	8.62947	10.3464	9.80742	9.8736	9.59235	8.99872	10.1163	9.90416	9.80849	10.0079	9.42538	10.2785	10.2156	10.003	9.94216	9.45446
PCA_1-096	10.3977	9.90253	9.47326	9.29476	8.79627	10.4464	9.85708	9.37335	9.12184	8.57027	10.2708	9.61317	9.6215	9.1255	8.6723	10.278	9.80183	9.79195	9.71886	9.01545	10.2277	10.055	9.79512	9.991	9.43423	10.3802	10.1255	10.0324	9.9499	9.40402
PCA_1-097	10.3913	9.74044	9.51555	9.10975	8.92458	10.312	9.73389	9.57951	9.23504	8.70934	10.2098	9.7701	9.48985	9.09136	8.75953	10.2935	9.85966	9.75756	9.8784	9.07182	10.1288	10.1262	9.94236	9.9633	9.33345	10.2922	10.2458	9.96045	10.0545	9.55488
PCA_1-098	10.2673	9.82902	9.39226	9.04822	8.78229	10.4018	9.82887	9.54258	9.2335	8.48593	10.3582	9.67391	9.59184	9.17875	8.67954	10.0439	9.80842	9.7841	9.59088	9.03227	10.2113	10.0345	9.86884	9.75087	9.38064	10.2994	10.3822	10.3555	10.0613	9.57001
PCA_1-099	10.1815	9.87594	9.48672	9.17412	8.89594	10.0759	9.85994	9.5088	9.32933	8.60381	10.038	9.81907	9.32572	9.16307	8.78291	10.33	9.84551	9.8154	9.70623	9.05515	10.1798	10.1779	9.82537	9.90177	9.54189	10.383	10.2248	10.2743	10.1417	9.52168
PCA_1-100	10.121	9.91617	9.40044	9.01131	8.96557	10.2063	9.62281	9.52213	9.06789	8.65488	10.2085	9.78871	9.38998	9.18706	8.68101	10.1232	9.72656	9.89984	9.78283	9.11397	10.3375	9.8508	10.0462	9.76468	9.40205	10.3355	10.3503	10.1052	10.0391	9.35847

## Sheet: lambda_0.1
Row	kernel_0mm_parcels_100	kernel_0mm_parcels_200	kernel_0mm_parcels_400	kernel_0mm_parcels_1000	kernel_0mm_vertex	kernel_5mm_parcels_100	kernel_5mm_parcels_200	kernel_5mm_parcels_400	kernel_5mm_parcels_1000	kernel_5mm_vertex	kernel_10mm_parcels_100	kernel_10mm_parcels_200	kernel_10mm_parcels_400	kernel_10mm_parcels_1000	kernel_10mm_vertex	kernel_20mm_parcels_100	kernel_20mm_parcels_200	kernel_20mm_parcels_400	kernel_20mm_parcels_1000	kernel_20mm_vertex	kernel_30mm_parcels_100	kernel_30mm_parcels_200	kernel_30mm_parcels_400	kernel_30mm_parcels_1000	kernel_30mm_vertex	kernel_40mm_parcels_100	kernel_40mm_parcels_200	kernel_40mm_parcels_400	kernel_40mm_parcels_1000	kernel_40mm_vertex
PCA_1-001	12.2683	12.1916	12.1907	12.1314	11.6622	12.3535	12.2733	12.2738	12.2279	11.9843	12.3835	12.3029	12.3292	12.3055	12.151	12.3709	12.3227	12.3371	12.3688	12.249	12.3534	12.3207	12.3008	12.3688	12.2433	12.3104	12.2657	12.2723	12.3477	12.2187
PCA_1-002	12.282	12.2012	12.16	12.1287	10.8796	12.3603	12.2474	12.243	12.2173	11.0695	12.4005	12.3872	12.3217	12.314	11.7129	12.3806	12.3384	12.334	12.3658	12.2431	12.3265	12.3026	12.3023	12.3709	12.245	12.2848	12.301	12.2799	12.3358	12.2315
PCA_1-003	11.8923	11.4349	11.0346	10.6251	10.9246	11.8398	11.4644	11.1441	10.661	10.9299	11.892	11.5103	11.2176	10.8205	10.995	11.8323	11.5667	11.4482	11.1917	11.3999	11.8478	11.6177	11.5468	11.3461	11.5222	11.9386	11.6488	11.613	11.4733	11.5421
PCA_1-004	11.0698	10.866	10.9203	10.6382	9.80875	11.1297	11.0042	11.0103	10.6518	9.85449	11.2446	11.1327	11.1061	10.8196	10.1143	11.3337	11.2876	11.297	11.1336	10.9721	11.3339	11.3645	11.3498	11.2757	10.9919	11.374	11.3976	11.3314	11.2924	11.0569
PCA_1-005	11.0768	10.8335	10.7387	10.1999	9.19313	11.1671	10.9359	10.8504	10.3496	9.48888	11.2157	11.0696	11.0346	10.6899	9.99703	11.2646	11.2216	11.3073	11.1104	10.9233	11.2681	11.2668	11.2249	11.2222	10.9752	11.2812	11.2646	11.271	11.2814	10.9826
PCA_1-006	11.0593	10.714	10.4539	9.40225	9.0207	11.1483	10.8116	10.6246	9.67759	9.47104	11.1924	10.9651	10.8744	10.5445	9.89794	11.267	11.1839	11.2158	11.0969	10.9547	11.2777	11.2596	11.3269	11.2361	11.0177	11.2326	11.2272	11.29	11.2639	11.0135
PCA_1-007	10.8587	10.4389	9.98299	9.43631	8.79333	10.948	10.7756	10.064	9.47428	8.82017	11.1326	11.0103	10.8175	9.95398	8.89316	11.2555	11.2014	11.246	11.1008	10.5209	11.2099	11.2741	11.3407	11.2407	10.8825	11.1864	11.2303	11.3556	11.2662	11.0409
PCA_1-008	10.8773	10.3013	9.99878	9.44129	8.85375	10.9715	10.4257	10.0467	9.44348	8.77915	11.1029	10.7971	10.4168	9.85106	8.89207	11.1914	11.2024	11.0193	10.8539	10.5373	11.2339	11.1997	11.1756	11.1215	10.8165	11.2477	11.2588	11.2832	11.156	10.8455
PCA_1-009	10.9164	10.2153	9.96832	9.38398	8.82993	10.9679	10.3732	10.0888	9.48504	8.8065	11.0785	10.5545	10.3043	9.78937	8.89007	11.2122	11.0554	10.6919	10.5536	10.019	11.245	11.2224	11.1163	11.0365	10.7203	11.2505	11.2909	11.3004	11.1855	10.8533
PCA_1-010	10.8155	10.0531	9.66087	9.39395	8.88519	10.8511	10.0963	9.72916	9.41962	8.8215	10.9342	10.1695	9.90336	9.55907	8.86476	11.0622	10.6428	10.3041	10.1051	9.76169	11.2682	11.1137	10.648	10.5019	10.3123	11.2501	11.2178	10.8687	10.8811	10.8665
PCA_1-011	10.5827	10.0025	9.67403	9.43606	8.86797	10.8739	10.0446	9.70212	9.45299	8.79929	10.9024	10.1719	9.84705	9.59979	8.83796	10.7185	10.5113	10.2523	10.0383	9.75554	10.7824	11.11	10.5539	10.5141	10.2698	11.1632	11.2165	10.6939	10.7963	10.4604
PCA_1-012	10.6137	10.0424	9.67892	9.41647	8.83338	10.7037	10.107	9.75757	9.44835	8.81862	10.7872	10.1998	9.84745	9.56008	8.8278	10.7455	10.4393	10.3034	10.1039	9.76924	10.7482	10.5941	10.5762	10.4158	10.2708	10.7941	10.7228	10.7316	10.635	10.4653
PCA_1-013	10.6326	9.98385	9.65563	9.45138	8.65414	10.7066	10.0673	9.77087	9.49489	8.57665	10.7698	10.1995	9.86583	9.58996	8.81686	10.8455	10.3923	10.2522	10.0447	9.7521	10.7799	10.6106	10.4982	10.4943	10.2461	10.7348	10.7614	10.7578	10.7351	10.3996
PCA_1-014	10.5834	9.89465	9.61576	9.14479	8.65741	10.7239	9.93205	9.73247	9.42147	8.53364	10.7679	10.0216	9.84882	9.54591	8.7822	10.7758	10.2535	10.152	10.0078	9.72946	10.6036	10.4695	10.4235	10.2617	10.3109	10.6661	10.6484	10.4789	10.4058	10.4721
PCA_1-015	10.6051	9.88922	9.63413	9.18057	8.63244	10.6567	9.97775	9.69818	9.34952	8.49732	10.8337	10.0453	9.8204	9.59581	8.70312	10.733	10.2519	10.2226	10.0297	9.71678	10.6108	10.4633	10.4284	10.25	10.2407	10.7317	10.5632	10.5524	10.4561	10.3469
PCA_1-016	10.4416	9.90581	9.42698	8.95546	8.48746	10.5594	9.93061	9.48741	8.99977	8.56795	10.5707	10.1141	9.85859	9.58141	8.67766	10.6455	10.2296	10.2213	9.95278	9.75475	10.6883	10.424	10.3687	10.2889	10.2233	10.7093	10.6101	10.5159	10.4214	10.3484
PCA_1-017	10.4616	9.93683	9.39932	9.01145	8.48763	10.4926	9.97183	9.509	8.99281	8.49929	10.5206	10.0602	9.80657	9.3449	8.73276	10.7029	10.3131	10.1431	9.95951	9.59457	10.7029	10.4631	10.4132	10.2859	10.2678	10.6665	10.5861	10.5047	10.5058	10.494
PCA_1-018	10.4537	9.93258	9.38253	8.97869	8.39779	10.5404	10.0092	9.44925	8.99514	8.48558	10.5612	10.0494	9.77605	9.28933	8.68557	10.5826	10.3089	10.1424	9.97103	9.64671	10.6525	10.4544	10.3747	10.3037	10.1992	10.643	10.5751	10.5037	10.4514	10.3708
PCA_1-019	10.4855	9.82129	9.30098	8.90377	8.42482	10.5714	9.92474	9.50526	9.03739	8.49874	10.5519	10.0311	9.73713	9.32887	8.66723	10.6113	10.2684	10.2279	10.0294	9.38636	10.6874	10.4572	10.3984	10.2973	10.2048	10.7372	10.5983	10.4336	10.4681	10.3241
PCA_1-020	10.3848	9.88554	9.29467	8.9491	8.45548	10.5412	9.92145	9.40875	8.99836	8.48117	10.5441	10.0693	9.6984	9.40163	8.72749	10.6586	10.2931	10.1025	10.0055	9.39362	10.7	10.4701	10.4236	10.3295	10.2049	10.6047	10.512	10.4822	10.422	10.3251
PCA_1-021	10.354	9.81212	9.25418	8.96736	8.37448	10.5539	9.9056	9.40522	8.98269	8.39679	10.5788	10.0469	9.62914	9.24909	8.6855	10.6515	10.2695	10.2087	9.98554	9.41533	10.5547	10.3547	10.3146	10.3756	10.1504	10.6263	10.484	10.4444	10.4569	10.318
PCA_1-022	10.3102	9.79655	9.29235	8.97249	8.35188	10.4146	9.90011	9.38484	8.91639	8.4218	10.6201	10.0185	9.52971	9.21713	8.69559	10.6328	10.2479	10.2236	10.068	9.54605	10.643	10.4296	10.3535	10.3739	9.97579	10.6821	10.4862	10.465	10.5016	10.2567
PCA_1-023	10.3603	9.79409	9.32532	8.96967	8.43193	10.4542	9.93816	9.4362	8.98734	8.50527	10.5643	9.95117	9.61648	9.16367	8.65266	10.6536	10.2006	10.0844	10.0745	9.40739	10.5106	10.4199	10.3709	10.3715	10.0305	10.5751	10.5095	10.5178	10.3722	10.266
PCA_1-024	10.2587	9.8074	9.41196	8.91747	8.44217	10.3159	9.81444	9.4365	8.96211	8.47025	10.5786	9.95768	9.58792	9.08658	8.65912	10.6026	10.1766	9.98277	9.87939	9.36525	10.5832	10.4176	10.4793	10.3599	9.94465	10.5455	10.5229	10.4426	10.5137	10.1615
PCA_1-025	10.2176	9.77728	9.42194	8.97893	8.42671	10.323	9.88991	9.47857	8.86147	8.50496	10.4344	9.95515	9.62412	9.07687	8.67596	10.5923	10.2411	10.0105	9.8625	9.31914	10.5737	10.3721	10.382	10.3106	9.88581	10.6023	10.5143	10.4793	10.4074	10.2507
PCA_1-026	10.2483	9.74814	9.28439	8.83838	8.36406	10.4107	9.81177	9.40635	8.85401	8.51301	10.4062	9.93027	9.63347	9.12338	8.62991	10.5747	10.2629	10.0411	9.73887	9.33728	10.5574	10.46	10.2043	10.2924	9.89623	10.5615	10.5309	10.4387	10.5009	10.2786
PCA_1-027	10.1727	9.67811	9.22353	8.81065	8.4065	10.4206	9.69852	9.4401	8.88363	8.4731	10.416	9.8929	9.60617	9.03301	8.68236	10.4687	10.2471	10.0201	9.86073	9.41997	10.5858	10.4537	10.2373	10.2967	9.84524	10.5912	10.5892	10.4661	10.5118	10.2045
PCA_1-028	10.1714	9.75496	9.2184	8.88724	8.35573	10.2096	9.81469	9.34305	8.85002	8.49655	10.4552	9.81901	9.56325	9.04468	8.68278	10.584	10.3163	9.99832	9.75769	9.34287	10.602	10.4199	10.2979	10.2267	9.8397	10.579	10.5128	10.3396	10.4585	10.236
PCA_1-029	10.2853	9.56917	9.25422	8.92011	8.46052	10.2071	9.78001	9.34344	8.97097	8.55172	10.304	9.82058	9.55471	9.08764	8.7264	10.5892	10.237	10.0008	9.68174	9.41262	10.5526	10.4831	10.2884	10.2438	9.91387	10.6897	10.5723	10.3767	10.4532	10.1354
PCA_1-030	10.0963	9.57779	9.25931	8.83853	8.39756	10.267	9.66133	9.31865	8.96416	8.52349	10.298	9.75442	9.66322	9.08303	8.69094	10.4706	10.2284	9.97062	9.70408	9.33945	10.5889	10.4888	10.3802	10.2202	9.94073	10.6654	10.5957	10.3643	10.3871	10.244
PCA_1-031	10.1253	9.56643	9.13685	8.95521	8.44868	10.2033	9.6541	9.32681	8.9598	8.56704	10.2808	9.67276	9.63562	9.16345	8.69137	10.4959	10.2474	10.0032	9.69569	9.31506	10.6178	10.4825	10.3324	10.1359	9.79519	10.5065	10.5671	10.3931	10.3851	10.1467
PCA_1-032	10.0484	9.62589	9.20914	8.93694	8.39522	10.1564	9.7418	9.35083	8.82632	8.4415	10.2639	9.7852	9.60482	9.13462	8.62668	10.4404	10.2056	9.98997	9.69078	9.31693	10.559	10.4625	10.2458	10.1219	9.86504	10.5635	10.524	10.4911	10.3778	10.1626
PCA_1-033	10.243	9.54976	9.26894	8.90977	8.43487	10.282	9.70271	9.31308	8.92423	8.54551	10.3143	9.79287	9.60991	8.9461	8.65709	10.4588	10.1158	10.032	9.70534	9.24057	10.5114	10.475	10.2998	10.2371	9.83133	10.5765	10.6282	10.5038	10.3832	10.1311
PCA_1-034	10.2317	9.59914	9.30528	8.94118	8.37661	10.1745	9.68452	9.36344	8.90233	8.42428	10.1868	9.71511	9.60635	9.01885	8.69908	10.4095	10.1776	10.0195	9.66988	9.2638	10.5677	10.5077	10.3459	10.2215	9.73722	10.5463	10.541	10.4482	10.3638	10.1893
PCA_1-035	10.0706	9.67427	9.22181	8.96657	8.39119	10.3018	9.74497	9.26932	8.88321	8.4518	10.3354	9.79215	9.42068	8.96474	8.54454	10.3785	10.1317	10.0664	9.83595	9.1761	10.5579	10.4045	10.271	10.2073	9.75297	10.5526	10.5208	10.4237	10.3434	9.9585
PCA_1-036	10.1791	9.60687	9.24579	8.89058	8.38646	10.2472	9.63084	9.25883	8.88529	8.48661	10.2712	9.72698	9.31251	9.07592	8.5256	10.4147	10.0741	9.84997	9.71149	9.23478	10.4757	10.4456	10.3008	10.1573	9.71532	10.4014	10.52	10.3634	10.3623	9.87012
PCA_1-037	10.1802	9.68865	9.27046	8.8974	8.37588	10.2345	9.70846	9.364	8.87654	8.42049	10.326	9.68407	9.37114	9.04886	8.53668	10.4622	10.0819	9.83316	9.63311	9.21404	10.5605	10.3879	10.3033	10.1462	9.82693	10.4548	10.5956	10.3956	10.2985	9.85723
PCA_1-038	10.1632	9.66927	9.27945	8.94548	8.38155	10.1312	9.6628	9.27202	8.89529	8.41613	10.2933	9.74588	9.37147	9.07634	8.60197	10.4422	9.85432	9.78724	9.65486	9.27754	10.467	10.426	10.2181	10.1935	9.71229	10.5244	10.6076	10.445	10.3012	9.87225
PCA_1-039	10.1155	9.64787	9.17537	8.97845	8.3761	10.1755	9.65162	9.21464	8.95813	8.50155	10.4299	9.62586	9.35717	9.16755	8.53592	10.5042	9.9707	9.70467	9.63751	9.18914	10.4877	10.2911	10.3636	10.1975	9.8092	10.3722	10.5925	10.4153	10.305	9.85467
PCA_1-040	10.2137	9.61213	9.33869	8.95191	8.40795	10.2318	9.72086	9.25724	8.99587	8.35866	10.4108	9.76876	9.40321	9.04744	8.65238	10.5579	9.98137	9.8101	9.70063	9.25517	10.5053	10.1712	10.1764	10.2102	9.77405	10.4574	10.5472	10.3667	10.3773	9.80579
PCA_1-041	10.177	9.72646	9.27406	8.94858	8.35485	10.2919	9.70822	9.36042	8.95787	8.31069	10.4226	9.67416	9.39229	9.03096	8.64428	10.5092	9.89399	9.85165	9.63884	9.30297	10.4025	10.2309	10.1143	10.1859	9.72574	10.5909	10.579	10.4032	10.3861	9.79272
PCA_1-042	10.2911	9.70945	9.24857	8.9746	8.39589	10.2279	9.7064	9.28942	8.98886	8.35669	10.31	9.79728	9.27107	8.95904	8.60468	10.4439	10.0046	9.79091	9.58754	9.29176	10.3826	10.3495	10.1874	10.1389	9.67669	10.4921	10.4503	10.3588	10.3461	9.77079
PCA_1-043	10.212	9.64334	9.37444	9.00909	8.45351	10.2804	9.70112	9.27693	8.91749	8.36757	10.261	9.80367	9.36158	8.96817	8.66083	10.4398	10.0026	9.74433	9.61641	9.14578	10.4142	10.2072	10.158	10.0039	9.72033	10.5079	10.5518	10.4114	10.4201	9.7562
PCA_1-044	10.2327	9.75046	9.23807	9.00243	8.44486	10.3509	9.73656	9.28431	8.94278	8.4007	10.387	9.72085	9.30463	9.06128	8.55395	10.4854	9.81373	9.81129	9.60828	9.12592	10.4178	10.1563	10.0823	10.0704	9.71112	10.4491	10.4822	10.4109	10.3621	9.77333
PCA_1-045	10.256	9.7027	9.23457	8.99298	8.52276	10.2338	9.67782	9.30275	9.03361	8.3462	10.37	9.70544	9.36927	9.10619	8.50847	10.4932	9.86741	9.74087	9.67512	9.13806	10.3585	10.1014	10.0857	9.98333	9.69558	10.4645	10.3543	10.1917	10.2665	9.90106
PCA_1-046	10.1587	9.56441	9.30551	8.91873	8.49092	10.2834	9.63653	9.35633	8.92677	8.36683	10.3384	9.69719	9.41921	8.94692	8.5071	10.4651	9.95038	9.63966	9.51399	9.07607	10.3685	10.1374	9.9272	9.93556	9.6904	10.5126	10.3487	10.2251	10.1921	9.79242
PCA_1-047	10.1481	9.58415	9.36896	8.96405	8.56918	10.2399	9.68032	9.29991	8.95614	8.33572	10.3831	9.8592	9.27603	9.02208	8.55294	10.6242	9.87513	9.68357	9.50916	9.1316	10.4215	10.1347	10.1499	9.95701	9.64889	10.3879	10.2947	10.2873	10.1974	9.77761
PCA_1-048	10.1726	9.60384	9.35894	8.98116	8.69943	10.3179	9.60373	9.35584	9.06013	8.38256	10.3328	9.61565	9.23568	9.05728	8.42314	10.3403	9.75796	9.78687	9.43404	9.10109	10.4263	10.095	10.0039	9.96162	9.63431	10.3144	10.3054	10.1646	10.147	9.81986
PCA_1-049	10.1474	9.62109	9.34514	8.94193	8.58094	10.3014	9.69956	9.34017	9.04613	8.51568	10.3891	9.65491	9.35684	9.01484	8.5696	10.1785	9.87439	9.65644	9.46176	9.0151	10.3628	10.1079	9.99443	10.016	9.60185	10.2495	10.3539	10.3298	10.1455	9.74582
PCA_1-050	10.2494	9.59174	9.37881	8.8441	8.52523	10.2966	9.59274	9.27277	8.94332	8.42219	10.3097	9.63595	9.30895	9.06353	8.51244	10.3001	9.80729	9.74215	9.52913	9.03998	10.3402	10.0657	10.0703	10.0175	9.69861	10.2614	10.2416	10.2566	10.1778	9.71305
PCA_1-051	10.2196	9.6562	9.32819	8.84011	8.46593	10.2917	9.64356	9.24522	9.01804	8.51019	10.3259	9.6228	9.18446	9.0313	8.63265	10.1799	9.75867	9.77715	9.50676	8.99209	10.2227	10.0732	9.99921	10.0766	9.60794	10.3472	10.128	10.1601	10.1695	9.67268
PCA_1-052	10.1422	9.6783	9.42421	8.91844	8.4337	10.2585	9.63973	9.36064	8.90341	8.40643	10.4428	9.62666	9.31617	9.03951	8.49979	10.3334	9.82227	9.80688	9.57388	8.97432	10.1546	10.1646	10.0969	10.0736	9.63289	10.3306	10.2303	10.121	10.1708	9.79449
PCA_1-053	10.249	9.6851	9.42537	8.93979	8.51773	10.2411	9.54561	9.38144	8.9047	8.43853	10.2528	9.65124	9.3329	8.91839	8.53562	10.2248	9.7678	9.65987	9.54422	8.99439	10.2042	10.1986	10.0419	9.98905	9.6675	10.251	10.2664	10.1941	10.1725	9.65191
PCA_1-054	10.2022	9.60042	9.24847	8.97734	8.50807	10.2069	9.67544	9.27724	8.89838	8.48329	10.2611	9.55498	9.44079	9.09888	8.55095	10.1761	9.75609	9.62979	9.53687	9.03728	10.1932	10.0979	9.94098	9.94649	9.68414	10.2423	10.0393	10.2127	10.2123	9.63798
PCA_1-055	10.1565	9.65306	9.23084	9.12362	8.67602	10.2594	9.78725	9.17923	8.84032	8.50748	10.3069	9.56037	9.31529	8.97704	8.63795	10.1376	9.69368	9.6937	9.56642	9.13865	10.2368	10.1021	10.0088	9.98945	9.55699	10.2148	10.1943	10.1715	10.292	9.60559
PCA_1-056	10.1414	9.70998	9.29341	8.94423	8.58313	10.0787	9.57574	9.26316	8.85312	8.41867	10.2391	9.66033	9.37927	8.85364	8.56412	10.1069	9.73287	9.69597	9.41576	9.02705	10.1419	10.1212	10.0075	10.1361	9.50879	10.2539	10.1181	10.3685	10.1538	9.61567
PCA_1-057	10.1661	9.59538	9.2268	8.97504	8.64338	10.2303	9.58493	9.30745	8.84556	8.49757	10.3008	9.64457	9.37329	8.95509	8.58461	10.2873	9.84538	9.60954	9.55197	8.99894	10.1152	10.0698	10.0457	10.0485	9.59295	10.192	10.1582	10.1681	10.2369	9.66273
PCA_1-058	9.99019	9.55936	9.25334	8.94924	8.65439	10.2903	9.5331	9.30346	8.86282	8.48529	10.2249	9.73532	9.35623	8.99345	8.59973	10.1746	9.88142	9.59291	9.47321	9.01014	10.1593	10.1677	9.9715	10.006	9.61149	10.0805	10.2253	10.1421	10.2548	9.63081
PCA_1-059	10.0588	9.69831	9.20375	8.93166	8.54413	10.2512	9.62165	9.29634	8.81661	8.46877	10.215	9.5874	9.48184	9.03126	8.60798	10.1205	9.75978	9.66744	9.42586	8.8739	10.1864	10.0045	10.1307	10.0328	9.6162	10.0889	10.2133	10.1871	10.2342	9.64055
PCA_1-060	10.1001	9.70672	9.22627	8.87247	8.30139	10.2352	9.55645	9.31586	8.92169	8.45368	10.2461	9.74581	9.4059	9.07471	8.49946	10.0533	9.78912	9.62282	9.52622	8.92743	10.2027	9.99467	9.99409	10.0529	9.58202	10.1885	10.1192	10.1153	10.244	9.73917
PCA_1-061	10.0376	9.62324	9.29973	8.90983	8.43455	10.329	9.64272	9.34883	8.80807	8.30951	10.2066	9.62604	9.32076	9.00336	8.58145	10.1694	9.78457	9.7043	9.52389	9.11015	10.1515	10.0473	10.0595	10.091	9.49066	10.1812	10.1883	10.2048	10.2098	9.7511
PCA_1-062	10.0508	9.60328	9.35913	9.02131	8.22688	10.1548	9.65375	9.30159	8.91391	8.34549	10.134	9.72518	9.38691	9.05848	8.65199	10.1259	9.6776	9.74025	9.51424	8.95564	10.2134	10.108	10.0589	10.1681	9.49503	10.1056	10.1941	10.2453	10.1229	9.64156
PCA_1-063	9.97382	9.66093	9.31664	8.93255	8.33655	10.085	9.75254	9.30476	8.96274	8.35591	10.0199	9.57738	9.37411	8.9618	8.59017	10.0879	9.90517	9.68109	9.41549	8.89782	10.1701	10.0603	10.1553	9.95943	9.49734	10.1946	10.1949	10.178	10.2435	9.73574
PCA_1-064	10.0946	9.60831	9.37757	9.00654	8.32424	10.2195	9.66604	9.29631	8.94395	8.39677	10.079	9.77561	9.37911	9.06381	8.61223	10.2192	9.80818	9.67304	9.48038	8.92751	10.1837	10.1212	10.1757	9.86644	9.47378	10.2009	10.1934	10.2641	10.2115	9.74405
PCA_1-065	10.015	9.73015	9.38034	8.9334	8.45095	10.0855	9.66224	9.38289	8.99975	8.34948	10.209	9.60788	9.47374	9.08894	8.61835	10.1879	9.89409	9.71417	9.57919	8.94992	10.232	10.1223	9.96866	9.93709	9.44908	10.245	10.3433	10.1821	10.3024	9.66317
PCA_1-066	9.96874	9.63777	9.31037	9.03331	8.47889	10.0414	9.77672	9.30877	8.92842	8.51703	10.1712	9.64491	9.46259	9.037	8.61803	10.2298	9.72142	9.66738	9.55409	8.95185	10.1062	10.1642	10.0128	9.87298	9.40251	10.1933	10.2749	10.1454	10.2314	9.60687
PCA_1-067	10.1176	9.67214	9.29437	8.99751	8.48	10.195	9.6455	9.3667	9.0166	8.41086	10.1433	9.6221	9.43214	9.07015	8.49977	10.2059	9.78305	9.69256	9.5875	9.00276	10.1473	10.1465	10.1536	9.99245	9.45812	10.329	10.2074	10.2205	10.1304	9.66723
PCA_1-068	10.055	9.55438	9.31757	9.10299	8.49208	10.1245	9.62973	9.35782	8.95539	8.43774	10.1234	9.63409	9.56958	9.06994	8.60254	10.3115	9.86616	9.59073	9.61783	8.98203	10.1164	10.0883	9.87556	9.94533	9.41868	10.3123	10.0899	10.3317	10.2358	9.62686
PCA_1-069	10.0128	9.62609	9.39777	8.9415	8.34855	10.0612	9.63685	9.4134	8.98728	8.47115	10.2506	9.61407	9.35312	9.1755	8.64865	10.2069	9.82042	9.77338	9.56416	9.05522	10.1812	9.97334	9.88424	9.94364	9.49826	10.2846	10.1707	10.2966	10.1792	9.72591
PCA_1-070	10.0755	9.74116	9.31881	9.10659	8.40998	10.0084	9.70798	9.43773	9.04654	8.43528	10.1384	9.63545	9.45035	9.13876	8.64365	10.2048	9.92143	9.66159	9.58419	8.92542	10.1714	10.1968	9.89068	9.92003	9.3825	10.3732	10.1968	10.1956	10.135	9.66839
PCA_1-071	10.1371	9.56485	9.40923	9.00125	8.4818	10.085	9.69153	9.42626	8.94844	8.26931	10.0906	9.70107	9.49031	9.16044	8.61684	10.1518	9.73618	9.66017	9.39048	8.90869	10.2873	9.9642	9.95715	9.9246	9.33499	10.2765	10.2645	10.2266	10.1482	9.63534
PCA_1-072	10.1203	9.78298	9.38038	9.09471	8.44799	10.033	9.66462	9.47687	8.91806	8.40263	10.1446	9.67169	9.53115	9.15375	8.51068	10.1852	9.84796	9.72321	9.50833	9.02038	10.2115	10.0296	9.99131	9.85461	9.31139	10.2609	10.3024	10.2851	10.172	9.62181
PCA_1-073	10.1519	9.62898	9.42213	9.03722	8.59262	10.002	9.65818	9.36885	9.01695	8.44506	10.1832	9.67536	9.50907	9.02337	8.54599	10.1725	9.69507	9.65386	9.52168	8.93603	10.2702	9.91818	9.989	9.84233	9.4093	10.3335	10.1751	10.2169	10.2335	9.68304
PCA_1-074	10.088	9.67271	9.34607	9.01062	8.42723	10.0475	9.6736	9.32477	9.00291	8.48196	10.0956	9.5968	9.42133	9.10962	8.5496	10.1798	9.74016	9.62761	9.4904	9.03511	10.0831	9.93583	9.85778	9.87657	9.46989	10.1158	10.2772	10.153	10.1935	9.75271
PCA_1-075	10.1108	9.76503	9.40717	9.0806	8.5065	10.0612	9.64799	9.34935	9.02967	8.45701	10.1512	9.75498	9.57451	9.03706	8.51521	10.269	9.71569	9.72098	9.50711	9.16847	10.2362	9.92423	10.044	9.92239	9.50415	10.2197	10.2687	10.2667	10.1868	9.70408
PCA_1-076	9.95996	9.70443	9.28771	9.14664	8.52523	10.1933	9.71405	9.22056	9.00826	8.50625	10.2283	9.65998	9.48543	9.12652	8.47815	10.1799	9.80282	9.68019	9.61803	9.03325	10.2094	9.88991	10.07	9.87598	9.53692	10.1419	10.1572	10.3618	10.1199	9.69322
PCA_1-077	10.0871	9.5691	9.27244	9.03458	8.50007	10.1739	9.80006	9.34319	9.0484	8.6212	10.209	9.69458	9.39319	9.14683	8.66804	10.2309	9.6375	9.62542	9.59581	8.92393	10.1823	9.98664	10.0002	9.83627	9.43041	10.3224	10.2069	10.3372	10.2304	9.74981
PCA_1-078	10.19	9.76458	9.29966	9.06116	8.63202	10.0826	9.77241	9.29922	9.11084	8.51516	10.1643	9.77327	9.35265	9.14846	8.57414	10.0519	9.70602	9.64797	9.52279	9.09778	10.2112	9.84993	9.94296	9.92349	9.5439	10.2158	10.2309	10.2883	10.1299	9.6932
PCA_1-079	10.1306	9.74627	9.43575	9.0343	8.49582	10.1036	9.72374	9.26392	9.03099	8.54442	10.2058	9.62465	9.38353	9.22063	8.48051	10.3306	9.67442	9.63898	9.53769	8.98288	10.2163	9.94732	10.0834	9.9151	9.46114	10.2845	10.1998	10.28	10.2364	9.55549
PCA_1-080	10.1261	9.70876	9.33344	9.05127	8.62011	10.2227	9.77481	9.3603	9.12613	8.46993	10.1282	9.59024	9.48158	9.2179	8.59628	10.189	9.77639	9.72144	9.4556	8.97635	10.1778	9.88862	9.88051	10.0897	9.42911	10.2898	10.1953	10.3221	10.0856	9.6082
PCA_1-081	10.1292	9.87854	9.39569	9.11818	8.46333	10.1843	9.81305	9.44264	9.05901	8.57958	10.1155	9.73184	9.42372	9.25634	8.56376	10.2539	9.67142	9.80057	9.66529	8.89392	10.1188	9.99842	10.1382	9.95631	9.38054	10.2969	10.0388	10.3412	10.2061	9.6001
PCA_1-082	9.97413	9.75079	9.2735	9.21357	8.64487	10.0251	9.69149	9.34148	9.12311	8.50887	10.1443	9.69845	9.58896	9.28548	8.5995	10.297	9.59601	9.76875	9.47862	8.79969	10.1916	9.94749	10.0101	9.97477	9.46459	10.2532	10.1286	10.0752	10.2295	9.62983
PCA_1-083	10.0411	9.80228	9.35824	9.22184	8.62881	10.1833	9.78484	9.39208	9.0458	8.61267	10.1601	9.68936	9.47151	9.25475	8.59625	10.1043	9.67505	9.70724	9.43333	8.92116	10.122	9.86182	10.0337	9.79277	9.43702	10.193	10.149	10.0724	10.0536	9.63126
PCA_1-084	10.2666	9.79227	9.46071	9.14687	8.59778	10.3041	9.68219	9.50613	9.15039	8.50603	10.2241	9.84185	9.44009	9.1803	8.59421	10.3487	9.94111	9.79686	9.48002	9.01492	10.2531	9.97073	10.0751	9.82108	9.53056	10.2364	10.0628	10.192	10.1941	9.51482
PCA_1-085	10.1997	9.79271	9.45084	9.19408	8.62329	10.0887	9.87019	9.39492	9.06226	8.58709	10.3083	9.85676	9.53911	9.18938	8.55812	10.1574	9.73407	9.66295	9.55454	9.02059	10.2331	9.91556	10.0755	9.83047	9.47661	10.2507	10.2216	10.0984	10.0938	9.58599
PCA_1-086	10.1613	9.87305	9.52702	9.31419	8.73254	10.0273	9.80402	9.41325	9.12872	8.45561	10.2203	9.62983	9.4299	9.24353	8.60858	10.1238	9.96151	9.68527	9.55478	9.04247	10.1646	9.95539	10.0225	9.99128	9.36462	10.2602	10.292	10.1647	10.1756	9.64446
PCA_1-087	10.1483	9.86497	9.30553	9.0887	8.77191	10.2342	9.81215	9.55909	9.24552	8.52378	10.2485	9.83362	9.50402	9.23005	8.71015	10.1743	9.67666	9.79849	9.59543	9.04853	10.268	10.0694	10.0679	9.9846	9.417	10.215	10.2886	10.2728	10.2396	9.63244
PCA_1-088	10.0766	9.92382	9.42995	9.16689	8.70729	10.3163	9.92527	9.46255	9.1728	8.59664	10.3074	9.72785	9.54453	9.33419	8.57543	10.4377	9.65283	9.93758	9.57645	9.05539	10.2817	10.0107	10.0404	9.91077	9.28343	10.3076	10.324	10.1744	10.2652	9.61285
PCA_1-089	10.3179	9.84157	9.51904	9.20319	8.89861	10.183	9.8344	9.47353	9.28888	8.57992	10.3779	9.66794	9.57291	9.26167	8.64297	10.1504	9.78497	9.73315	9.54083	8.95951	10.2058	9.97678	10.0022	9.73662	9.40947	10.2836	10.1958	10.1962	10.1914	9.67476
PCA_1-090	10.1826	9.92837	9.49149	9.19114	8.74789	10.2539	9.90257	9.50164	9.22186	8.60992	10.178	9.80956	9.60597	9.23653	8.71343	10.1783	9.73865	9.70598	9.58365	9.06907	10.2893	10.1433	10.039	9.95905	9.49041	10.2792	10.1403	10.2455	10.1458	9.57044
PCA_1-091	10.2014	10.0634	9.45476	8.97701	8.91276	10.3861	9.77125	9.4587	9.14985	8.5984	10.2763	9.72208	9.50189	9.30439	8.67247	10.192	9.75316	9.67059	9.57303	9.12816	10.2915	10.0956	9.89427	9.92989	9.42001	10.3564	10.308	10.0339	10.1808	9.68463
PCA_1-092	10.2722	9.83997	9.45952	9.13482	8.73397	10.3452	9.68003	9.36669	9.17897	8.76227	10.2881	9.74778	9.53614	9.12822	8.62132	10.3173	9.91135	9.8407	9.55762	9.04418	10.3657	10.0811	9.89414	9.92113	9.31864	10.2814	10.2416	10.0624	10.0308	9.53873
PCA_1-093	10.3742	9.82012	9.39845	9.17837	8.8481	10.3638	9.7231	9.44756	9.1244	8.68942	10.4254	9.82056	9.55494	9.16911	8.8158	10.2761	9.72085	9.76173	9.56085	9.04813	10.2539	10.1044	9.93687	9.78959	9.41638	10.3668	10.2795	10.0803	10.2475	9.57191
PCA_1-094	10.3319	9.70983	9.50187	9.15577	8.72479	10.2333	9.74441	9.38828	9.11459	8.56937	10.1873	9.71708	9.55168	9.26591	8.6871	10.2239	9.66035	9.69728	9.63932	9.10238	10.2953	10.0974	10.0456	9.83752	9.3555	10.3923	10.2328	9.98758	10.0334	9.47003
PCA_1-095	10.451	9.83531	9.57742	9.17853	8.75626	10.329	9.75528	9.48041	9.31623	8.68322	10.312	9.68716	9.59689	9.09389	8.72366	10.2875	9.84747	9.73801	9.64394	8.97229	10.2576	10.0867	9.92606	9.85632	9.35153	10.3892	10.2532	10.114	10.0538	9.53019
PCA_1-096	10.2514	9.78735	9.52732	9.22063	8.77426	10.4021	9.84179	9.51326	9.1564	8.60051	10.2471	9.56564	9.60409	9.18714	8.68128	10.2616	9.78469	9.8297	9.72336	8.98133	10.3073	10.0662	9.98846	9.98536	9.44413	10.2367	10.2109	10.2617	10.0018	9.60425
PCA_1-097	10.446	9.85519	9.3679	9.29227	8.74702	10.2737	9.89624	9.5031	9.31764	8.59637	10.3388	9.79222	9.55927	9.28272	8.77848	10.2705	9.93153	9.79457	9.6601	9.03876	10.2684	9.95004	9.7682	9.78874	9.42253	10.3506	10.2149	10.1309	9.99286	9.73651
PCA_1-098	10.1752	9.78797	9.59667	9.36486	8.71501	10.1895	9.83072	9.55271	9.2126	8.63738	10.2467	9.83244	9.63232	9.18041	8.82476	10.1692	9.94139	9.76393	9.78261	9.0508	10.1407	10.0192	9.89098	9.70676	9.43462	10.226	10.2039	10.2789	10.0203	9.70146
PCA_1-099	10.3128	9.78942	9.51586	9.17068	8.80635	10.2046	9.82892	9.60826	9.16442	8.5562	10.3285	9.84173	9.49535	9.27911	8.76036	10.3453	9.8697	9.92855	9.60108	9.06705	10.1683	10.0678	9.8486	9.92108	9.53426	10.3005	10.2056	10.1609	9.98567	9.47682
PCA_1-100	10.1922	9.8996	9.50308	9.23421	8.7066	10.3395	9.73351	9.63232	9.22634	8.61495	10.1462	9.80767	9.56984	9.19298	8.72324	10.3125	9.83226	9.89106	9.77522	9.08397	10.2393	10.0404	10.0402	9.7761	9.4143	10.2329	10.0926	10.147	10.3454	9.46756

## Sheet: lambda_0.21544
Row	kernel_0mm_parcels_100	kernel_0mm_parcels_200	kernel_0mm_parcels_400	kernel_0mm_parcels_1000	kernel_0mm_vertex	kernel_5mm_parcels_100	kernel_5mm_parcels_200	kernel_5mm_parcels_400	kernel_5mm_parcels_1000	kernel_5mm_vertex	kernel_10mm_parcels_100	kernel_10mm_parcels_200	kernel_10mm_parcels_400	kernel_10mm_parcels_1000	kernel_10mm_vertex	kernel_20mm_parcels_100	kernel_20mm_parcels_200	kernel_20mm_parcels_400	kernel_20mm_parcels_1000	kernel_20mm_vertex	kernel_30mm_parcels_100	kernel_30mm_parcels_200	kernel_30mm_parcels_400	kernel_30mm_parcels_1000	kernel_30mm_vertex	kernel_40mm_parcels_100	kernel_40mm_parcels_200	kernel_40mm_parcels_400	kernel_40mm_parcels_1000	kernel_40mm_vertex
PCA_1-001	12.4277	12.3333	12.3511	12.2912	11.8943	12.5088	12.4421	12.442	12.3909	12.1415	12.5756	12.4707	12.5067	12.4908	12.3081	12.5324	12.4721	12.4916	12.5271	12.4014	12.517	12.4443	12.4835	12.5176	12.3985	12.4717	12.4157	12.4328	12.5003	12.3966
PCA_1-002	12.4208	12.3484	12.3176	12.292	11.103	12.5536	12.4491	12.4245	12.4268	11.2954	12.5625	12.4929	12.4947	12.5105	11.865	12.5366	12.4904	12.5059	12.5485	12.3784	12.5051	12.4845	12.4718	12.5423	12.4308	12.4579	12.4182	12.4496	12.5046	12.3841
PCA_1-003	12.0675	11.6535	11.2063	10.8551	11.1109	12.0478	11.681	11.3251	10.874	11.1752	12.0523	11.7028	11.4331	11.029	11.2008	12.0272	11.8022	11.6434	11.3811	11.5844	12.0311	11.8331	11.7074	11.5529	11.7178	12.0653	11.8449	11.7702	11.6851	11.7711
PCA_1-004	11.3007	11.1113	11.1659	10.8659	10.0631	11.3903	11.2173	11.2252	10.9168	10.1232	11.4578	11.3289	11.3764	11.0728	10.3573	11.5261	11.5111	11.4855	11.3885	11.1586	11.5416	11.5843	11.5461	11.4444	11.2164	11.5705	11.586	11.5519	11.4709	11.255
PCA_1-005	11.2912	11.0507	10.9859	10.4297	9.50627	11.3681	11.0986	11.0797	10.5942	9.78487	11.4602	11.2545	11.203	10.9099	10.2765	11.5295	11.4105	11.4662	11.3502	11.1315	11.4837	11.4722	11.4703	11.4407	11.1987	11.4709	11.4614	11.4887	11.4376	11.2499
PCA_1-006	11.2872	10.9227	10.702	9.7054	9.31599	11.3397	11.0253	10.8583	9.96393	9.77954	11.4051	11.2068	11.062	10.7693	10.1976	11.4009	11.4027	11.3794	11.284	11.0976	11.4808	11.4443	11.5507	11.4833	11.248	11.4217	11.4998	11.4895	11.4441	11.2292
PCA_1-007	11.0863	10.7024	10.2523	9.73201	9.12375	11.1382	11.0009	10.3236	9.74769	9.14659	11.3083	11.2129	11.0145	10.2171	9.21737	11.4496	11.4283	11.4298	11.3095	10.734	11.4128	11.4416	11.5282	11.4032	11.0724	11.4139	11.5155	11.5524	11.4586	11.2489
PCA_1-008	11.1021	10.4985	10.232	9.67849	9.15788	11.196	10.6699	10.3155	9.76552	9.10919	11.2694	10.9741	10.5642	10.0617	9.23756	11.4183	11.4065	11.2997	11.0933	10.7554	11.4434	11.4026	11.3756	11.2238	11.0661	11.4725	11.4224	11.4963	11.3551	11.0588
PCA_1-009	11.1843	10.4857	10.2588	9.72314	9.15926	11.2629	10.6461	10.3261	9.78282	9.12981	11.3162	10.8209	10.5222	10.0113	9.22732	11.4203	11.2121	10.8938	10.8089	10.3013	11.4776	11.4289	11.3891	11.1918	10.9743	11.4502	11.4246	11.4719	11.4175	11.0559
PCA_1-010	11.0264	10.3071	10.0062	9.68781	9.18367	11.1043	10.3398	9.96583	9.73002	9.14974	11.1473	10.4709	10.1835	9.81217	9.17343	11.3037	10.8831	10.509	10.3502	10.0579	11.4305	11.3278	10.8516	10.7164	10.5264	11.4497	11.4717	11.087	11.0931	11.1073
PCA_1-011	10.8456	10.2429	9.97913	9.71519	9.19242	11.06	10.3325	10.0247	9.75206	9.11822	11.1018	10.4683	10.1501	9.87456	9.1807	10.9365	10.7685	10.4768	10.3075	10.0589	11.0534	11.2786	10.7834	10.728	10.5054	11.3434	11.429	10.9243	11.0359	10.7192
PCA_1-012	10.8258	10.2876	9.93522	9.72532	9.19513	10.8962	10.2618	10.0031	9.78039	9.11247	10.9748	10.41	10.1246	9.89397	9.17484	10.972	10.6494	10.4594	10.3277	10.0398	10.9328	10.8248	10.8647	10.674	10.4795	11.0323	10.9585	10.9466	10.9148	10.6768
PCA_1-013	10.8562	10.2747	9.98856	9.73304	9.02566	10.9226	10.3024	9.98345	9.71501	8.89023	11.0417	10.3865	10.073	9.83959	9.09927	10.9905	10.6051	10.4812	10.248	10.0264	10.911	10.8619	10.7034	10.6581	10.4737	10.9368	10.9827	10.9029	10.8854	10.6786
PCA_1-014	10.8868	10.1381	9.91683	9.45483	8.98029	10.9353	10.1919	9.98649	9.69217	8.9485	11.0301	10.3339	10.113	9.84149	9.0617	10.9454	10.4753	10.4181	10.2089	9.98703	10.9012	10.789	10.6238	10.4765	10.4774	10.9279	10.894	10.6684	10.6282	10.6488
PCA_1-015	10.8642	10.1236	9.8821	9.51041	8.99679	10.8744	10.2391	9.98364	9.62517	8.86693	11.0335	10.3224	10.1273	9.8849	9.02919	10.9463	10.4851	10.4217	10.2705	10.02	10.8776	10.6801	10.629	10.5049	10.4879	10.912	10.7313	10.7525	10.655	10.6585
PCA_1-016	10.7287	10.2285	9.65897	9.315	8.81926	10.7698	10.2178	9.78583	9.30202	8.8584	10.8229	10.3759	10.1227	9.78676	8.99406	10.872	10.4992	10.4614	10.1958	10.08	10.9052	10.6804	10.6626	10.5066	10.4407	10.9138	10.7865	10.7939	10.6597	10.612
PCA_1-017	10.759	10.1967	9.70275	9.3647	8.89454	10.7192	10.2731	9.74116	9.36522	8.88263	10.7694	10.3336	10.0747	9.63149	9.04004	10.8821	10.5124	10.4582	10.3178	9.86609	10.8972	10.6466	10.6693	10.5435	10.5135	10.892	10.7896	10.749	10.6834	10.6458
PCA_1-018	10.6677	10.1778	9.66021	9.33025	8.75353	10.8021	10.2113	9.7416	9.38875	8.8255	10.7945	10.3218	10.0707	9.6445	9.00494	10.8296	10.566	10.4166	10.2523	9.89515	10.8645	10.669	10.6449	10.5473	10.418	10.9222	10.7675	10.7292	10.6409	10.6236
PCA_1-019	10.7256	10.1498	9.66592	9.2303	8.78459	10.7934	10.2336	9.72084	9.28003	8.95271	10.8176	10.3825	10.0041	9.68485	9.07656	10.826	10.5223	10.4343	10.2929	9.61261	10.785	10.6472	10.6206	10.5255	10.4557	10.8705	10.8361	10.6682	10.7076	10.5046
PCA_1-020	10.6953	10.1147	9.61744	9.22238	8.75245	10.7925	10.2141	9.69461	9.34527	8.84989	10.813	10.2838	9.94622	9.6367	9.01504	10.8751	10.4709	10.4338	10.287	9.68311	10.8691	10.6129	10.5968	10.606	10.4435	10.8301	10.7759	10.6956	10.6174	10.5866
PCA_1-021	10.5486	10.1449	9.531	9.25891	8.7716	10.7924	10.2168	9.70111	9.31486	8.77522	10.8115	10.3008	9.9008	9.58687	8.97159	10.8912	10.4752	10.4154	10.2852	9.6877	10.876	10.5865	10.5632	10.583	10.3988	10.8548	10.6652	10.6493	10.689	10.5055
PCA_1-022	10.5578	10.1194	9.63448	9.24447	8.73946	10.6337	10.1522	9.72368	9.25412	8.76407	10.7999	10.3334	9.84659	9.48893	9.02044	10.8234	10.4769	10.4279	10.3079	9.79611	10.8584	10.6014	10.6737	10.5782	10.2099	10.8825	10.7216	10.6913	10.6854	10.3965
PCA_1-023	10.5399	10.0898	9.56645	9.29008	8.73847	10.6294	10.1365	9.67767	9.30349	8.80846	10.7473	10.2234	9.80992	9.51209	9.10784	10.9049	10.4319	10.3751	10.2346	9.70274	10.7679	10.6537	10.6754	10.5574	10.2599	10.8157	10.7263	10.7525	10.6882	10.4337
PCA_1-024	10.5292	10.0849	9.55728	9.38401	8.81719	10.6451	10.143	9.70519	9.30123	8.81789	10.7844	10.2357	9.80769	9.46173	8.98826	10.858	10.4426	10.2781	10.0962	9.70752	10.7862	10.6582	10.633	10.5412	10.2526	10.8602	10.7483	10.6799	10.6137	10.4724
PCA_1-025	10.4613	10.0221	9.61783	9.2392	8.70498	10.5636	10.0958	9.73643	9.12024	8.81766	10.7094	10.2365	9.85242	9.36349	9.01804	10.8822	10.4346	10.2557	10.0678	9.61969	10.8276	10.604	10.5087	10.555	10.1578	10.8937	10.7214	10.6482	10.6266	10.4642
PCA_1-026	10.4826	9.99302	9.62513	9.12072	8.68245	10.5337	10.0567	9.73917	9.17172	8.87142	10.7035	10.209	9.93296	9.3778	8.98075	10.7165	10.4795	10.2814	10.0667	9.63062	10.8493	10.7092	10.4842	10.4709	10.207	10.7693	10.7737	10.6897	10.7299	10.4227
PCA_1-027	10.4956	9.96055	9.51358	9.15454	8.6886	10.5753	9.99575	9.65679	9.22469	8.87353	10.7196	10.1955	9.87035	9.37378	9.06149	10.7705	10.5349	10.2171	10.1084	9.65175	10.7491	10.6132	10.5754	10.4298	10.0945	10.8073	10.7382	10.7013	10.6583	10.5233
PCA_1-028	10.4462	9.99315	9.53307	9.25682	8.75405	10.5034	10.0015	9.73242	9.2573	8.81033	10.7165	10.0302	9.86678	9.38929	9.03078	10.7372	10.5045	10.3522	10.1298	9.56439	10.7831	10.6961	10.5211	10.4571	10.0818	10.7964	10.73	10.7044	10.7264	10.5288
PCA_1-029	10.407	9.94179	9.56676	9.25663	8.75204	10.4271	10.0546	9.7118	9.19325	8.84084	10.5803	10.047	9.73394	9.34682	9.05228	10.8551	10.4368	10.2973	9.95628	9.61244	10.6908	10.6301	10.5399	10.4975	10.0127	10.7796	10.7637	10.6343	10.6893	10.477
PCA_1-030	10.4622	9.78739	9.59165	9.20589	8.77684	10.372	9.82937	9.60461	9.23661	8.83517	10.5813	10.0187	9.89805	9.45628	8.99991	10.615	10.4803	10.3399	10.0451	9.55219	10.727	10.6888	10.523	10.4154	10.1154	10.7697	10.8178	10.6292	10.6157	10.4072
PCA_1-031	10.358	9.79785	9.52404	9.25848	8.74885	10.4618	9.90427	9.61591	9.19828	8.82696	10.5014	10.0247	9.86914	9.36785	9.03628	10.5909	10.4922	10.2421	10.0003	9.60967	10.7895	10.6587	10.4568	10.399	10.1086	10.726	10.8029	10.7086	10.6367	10.4483
PCA_1-032	10.3917	9.90185	9.5313	9.19866	8.73316	10.4515	9.8526	9.60441	9.23702	8.84134	10.5029	10.0014	9.86057	9.44872	8.99489	10.627	10.4746	10.2845	9.95684	9.55906	10.8274	10.7061	10.5162	10.4272	10.1724	10.8008	10.7456	10.7033	10.5984	10.368
PCA_1-033	10.4078	9.89165	9.5912	9.24246	8.72281	10.4617	9.9466	9.62597	9.3007	8.7559	10.5559	10.0818	9.88814	9.35642	8.992	10.6445	10.326	10.2615	10.0083	9.49109	10.7233	10.6562	10.502	10.4044	10.0144	10.8354	10.7623	10.6593	10.6228	10.4496
PCA_1-034	10.4333	9.9408	9.51872	9.24658	8.81094	10.4609	9.91185	9.59269	9.19435	8.78018	10.5908	10.0107	9.77368	9.29123	8.99075	10.569	10.4011	10.3454	10.0719	9.44193	10.7005	10.6709	10.4908	10.3806	10.0878	10.808	10.78	10.7697	10.595	10.4141
PCA_1-035	10.49	9.89513	9.51072	9.27787	8.76471	10.4431	9.90811	9.56236	9.2018	8.79143	10.5495	10.0189	9.63909	9.37335	8.84311	10.6383	10.354	10.3837	10.0041	9.59638	10.7659	10.7494	10.5438	10.4805	10.0778	10.7339	10.9104	10.6558	10.5926	10.3036
PCA_1-036	10.3703	9.8942	9.63514	9.28022	8.72628	10.4436	9.94676	9.64357	9.26058	8.83834	10.5053	10.0686	9.69238	9.36724	8.87709	10.6184	10.3118	10.2671	9.89515	9.48202	10.7881	10.7093	10.5294	10.3967	10.0432	10.6663	10.7387	10.6359	10.633	10.2166
PCA_1-037	10.3211	9.90727	9.49394	9.24237	8.85716	10.4465	9.97287	9.60876	9.19347	8.80883	10.5735	9.9828	9.66166	9.408	8.92337	10.6008	10.3911	10.0415	9.83706	9.56289	10.7208	10.592	10.5453	10.4127	9.99429	10.7109	10.7377	10.6784	10.5682	10.1085
PCA_1-038	10.323	9.90526	9.55606	9.29959	8.7177	10.4914	9.89808	9.64849	9.25424	8.82208	10.5491	9.958	9.66734	9.4188	8.9868	10.6333	10.1679	9.99543	9.96736	9.54854	10.6744	10.6748	10.5315	10.3643	9.96465	10.6684	10.754	10.7183	10.6021	10.1689
PCA_1-039	10.4684	9.95761	9.50953	9.20339	8.66135	10.4364	9.95446	9.62285	9.3295	8.86696	10.5731	9.93278	9.64842	9.43206	8.95175	10.6576	10.1919	10.1225	9.94854	9.51518	10.819	10.6663	10.5177	10.4098	9.96361	10.6216	10.689	10.6385	10.5834	10.0381
PCA_1-040	10.4157	9.89284	9.62155	9.21898	8.69653	10.4292	9.88348	9.51369	9.23228	8.72923	10.5524	10.0403	9.65763	9.44787	8.94362	10.6696	10.1717	10.0804	9.97372	9.46376	10.6547	10.5247	10.3831	10.4802	10.0538	10.6872	10.7477	10.7	10.6434	9.95496
PCA_1-041	10.3267	9.92925	9.51781	9.27691	8.7457	10.5265	9.92683	9.57875	9.30528	8.6631	10.5558	9.90869	9.63231	9.32288	8.97026	10.6939	10.1443	9.97907	9.8957	9.50368	10.638	10.5209	10.3497	10.2947	9.95545	10.7376	10.7206	10.6222	10.5885	10.0321
PCA_1-042	10.508	9.93375	9.59512	9.29252	8.79347	10.4811	9.93636	9.67742	9.28154	8.65165	10.637	9.92934	9.64635	9.33177	8.92831	10.6626	10.274	10.027	9.96602	9.59852	10.6357	10.4372	10.5209	10.3219	9.94478	10.724	10.7158	10.6189	10.6354	10.1078
PCA_1-043	10.5571	9.98999	9.58415	9.24212	8.83699	10.4778	10.0066	9.5805	9.34	8.71539	10.4697	9.99674	9.54239	9.31878	8.98837	10.6328	10.1137	10.0158	9.78384	9.50767	10.5446	10.4561	10.4496	10.2983	9.92769	10.695	10.781	10.568	10.6659	10.1326
PCA_1-044	10.4404	9.94833	9.58316	9.30657	8.81066	10.6459	10.0389	9.61894	9.25927	8.7318	10.6166	9.97877	9.66223	9.41412	8.97814	10.6713	10.2068	10.0036	9.85095	9.5576	10.6407	10.4658	10.4484	10.3259	10.0141	10.7324	10.7432	10.578	10.5792	10.118
PCA_1-045	10.4343	9.98482	9.61148	9.35753	8.79417	10.5904	10.003	9.56617	9.15923	8.69211	10.6264	9.95864	9.6007	9.29606	8.85732	10.6948	10.1387	9.90659	9.79705	9.49994	10.5315	10.4402	10.211	10.1967	9.95817	10.6747	10.534	10.4759	10.3684	10.0507
PCA_1-046	10.3996	9.92678	9.58983	9.27622	8.93741	10.5141	9.91086	9.68258	9.15081	8.8013	10.6555	10.0396	9.76728	9.35088	8.80251	10.7238	10.1243	9.91464	9.87016	9.38473	10.5908	10.3203	10.3189	10.2327	9.9705	10.5733	10.5194	10.6162	10.4165	10.0487
PCA_1-047	10.4636	9.90441	9.61885	9.36706	8.83974	10.4723	9.92528	9.60348	9.30282	8.74716	10.4928	9.96731	9.61931	9.42658	8.8067	10.7274	10.0861	10.0348	9.73271	9.42009	10.634	10.3288	10.2129	10.2283	9.89573	10.469	10.4925	10.5145	10.4128	10.0656
PCA_1-048	10.3647	9.95137	9.6422	9.20808	8.89133	10.5392	9.90236	9.5611	9.29043	8.75501	10.5463	9.9309	9.65365	9.37044	8.81882	10.5072	10.0289	9.94049	9.73046	9.45428	10.5694	10.3455	10.2666	10.2211	9.92303	10.4913	10.575	10.43	10.3976	9.88169
PCA_1-049	10.388	9.79058	9.68728	9.26513	8.89161	10.4945	9.97644	9.58229	9.40839	8.73542	10.6011	9.93318	9.61586	9.27641	8.92515	10.5238	10.0896	9.95452	9.69674	9.37776	10.5402	10.3627	10.3022	10.2415	9.90597	10.4855	10.3821	10.4484	10.4516	9.90383
PCA_1-050	10.4215	9.86924	9.63619	9.29025	8.82279	10.5403	9.80185	9.66262	9.23974	8.73905	10.452	9.90817	9.6324	9.32527	8.9422	10.4477	10.0547	10.0025	9.74944	9.36911	10.6579	10.4064	10.2728	10.2795	9.92601	10.5137	10.536	10.3966	10.4896	10.0319
PCA_1-051	10.4704	9.90731	9.71115	9.16865	8.8795	10.5312	9.99842	9.62103	9.33309	8.71786	10.4348	9.80973	9.58418	9.34055	8.88644	10.4639	9.99707	10.0279	9.8025	9.34992	10.4304	10.3715	10.2515	10.2662	9.95136	10.4538	10.4814	10.4702	10.4785	10.0216
PCA_1-052	10.3767	9.85888	9.68512	9.27693	8.85825	10.5474	9.92355	9.59619	9.24533	8.74123	10.5185	9.89668	9.61411	9.32713	8.85796	10.5522	10.0085	9.87867	9.8625	9.34551	10.4303	10.3199	10.2276	10.2477	9.92339	10.6791	10.5193	10.3411	10.4914	9.97719
PCA_1-053	10.4831	9.84761	9.67419	9.23655	8.91183	10.4855	9.89924	9.63908	9.25676	8.82563	10.4109	9.86385	9.6061	9.29016	8.86516	10.4043	9.99716	9.91912	9.77191	9.33787	10.4911	10.4759	10.2974	10.351	9.95143	10.3378	10.4282	10.2728	10.3585	9.87227
PCA_1-054	10.4928	9.86079	9.65837	9.29309	8.89857	10.4218	9.97002	9.56956	9.28416	8.7276	10.4145	9.94201	9.74886	9.26305	8.83728	10.4932	10.0882	9.83793	9.69538	9.27459	10.4527	10.3162	10.2145	10.2447	9.94321	10.3753	10.4338	10.4616	10.3807	9.98826
PCA_1-055	10.4176	9.95405	9.51579	9.26268	8.98388	10.5083	9.97064	9.67231	9.24863	8.7754	10.5064	9.88497	9.64779	9.28045	8.93549	10.3545	10.0366	9.96155	9.79407	9.29085	10.3874	10.2794	10.357	10.318	9.92544	10.4373	10.4154	10.4299	10.4356	9.91822
PCA_1-056	10.37	9.95416	9.55541	9.27867	9.08118	10.4826	9.85009	9.7212	9.15596	8.70373	10.4629	9.84758	9.66413	9.4362	8.91539	10.3722	10.1576	9.98535	9.76631	9.27357	10.4216	10.3026	10.2407	10.3671	9.85989	10.3634	10.4832	10.4669	10.4001	9.90784
PCA_1-057	10.4167	9.87485	9.51587	9.27217	8.99112	10.4688	9.8487	9.59192	9.17593	8.73088	10.4646	9.98349	9.68803	9.30419	8.81362	10.3868	10.046	9.92455	9.79591	9.34598	10.3682	10.2421	10.2243	10.3109	9.81285	10.4095	10.4707	10.4031	10.4042	9.91918
PCA_1-058	10.3708	9.83413	9.56856	9.2801	8.82398	10.4242	9.8845	9.58379	9.23001	8.85002	10.4938	9.9264	9.68867	9.31624	8.90576	10.4058	10.0579	9.88016	9.73618	9.287	10.3693	10.2114	10.2792	10.2346	9.84687	10.395	10.4242	10.3403	10.4592	9.94668
PCA_1-059	10.4296	9.81527	9.45805	9.33768	8.81655	10.4535	9.83695	9.74662	9.26319	8.77333	10.4362	9.78634	9.62988	9.42022	8.9376	10.3216	10.0608	9.84787	9.7147	9.20103	10.3306	10.3949	10.2984	10.225	9.80348	10.3259	10.3735	10.4049	10.4648	9.93909
PCA_1-060	10.4089	9.82968	9.56477	9.22031	8.65168	10.4955	9.797	9.64245	9.26355	8.76354	10.4701	9.99448	9.66265	9.41448	8.95255	10.4114	9.96004	9.91519	9.73736	9.25	10.4665	10.4629	10.3375	10.305	9.749	10.3363	10.3506	10.3866	10.4833	9.92274
PCA_1-061	10.4536	9.96071	9.60477	9.36558	8.73067	10.5232	9.80617	9.5854	9.29965	8.69949	10.3687	9.82823	9.68303	9.26788	8.98915	10.2659	10.0606	9.89201	9.66849	9.2749	10.4597	10.357	10.355	10.297	9.87943	10.4185	10.4787	10.4652	10.4194	9.95913
PCA_1-062	10.3253	9.97769	9.71435	9.29463	8.69795	10.3832	9.89134	9.54793	9.16226	8.69993	10.3882	9.84384	9.74204	9.30502	9.0539	10.4044	10.0944	9.96571	9.78191	9.31362	10.5456	10.3795	10.3104	10.3759	9.75647	10.4806	10.4645	10.4524	10.4972	9.95798
PCA_1-063	10.2105	9.80988	9.74318	9.39595	8.67909	10.4782	9.74735	9.66734	9.22644	8.70443	10.4112	9.83357	9.67874	9.31941	8.89324	10.3722	10.1229	9.94528	9.86224	9.26967	10.5803	10.3387	10.3131	10.161	9.6805	10.3438	10.4146	10.3723	10.4008	9.86396
PCA_1-064	10.2816	9.95082	9.68645	9.27579	8.71023	10.2933	9.91108	9.62931	9.27598	8.69926	10.4546	9.89306	9.67791	9.36051	8.81221	10.3823	10.0167	9.89828	9.69203	9.24764	10.3172	10.3779	10.3725	10.1674	9.8394	10.4715	10.4837	10.5577	10.4871	10.0092
PCA_1-065	10.2499	9.90138	9.7731	9.23198	8.70624	10.3588	9.9161	9.58603	9.39543	8.74761	10.3831	9.82082	9.73678	9.50258	8.90733	10.3367	9.99283	9.8937	9.69733	9.23477	10.4587	10.2609	10.2145	10.1757	9.95633	10.477	10.4108	10.4758	10.3781	9.89311
PCA_1-066	10.2492	9.95785	9.5663	9.38256	8.74582	10.3904	9.84079	9.66883	9.30489	8.79493	10.3343	9.90935	9.84108	9.38566	8.92629	10.3505	10.0804	9.87003	9.83944	9.33006	10.4507	10.2627	10.2577	10.0892	9.77725	10.3483	10.4838	10.5426	10.5015	9.99572
PCA_1-067	10.2422	9.94873	9.73424	9.44947	8.71325	10.3364	9.84987	9.6621	9.20126	8.84056	10.3707	9.84614	9.55121	9.41652	9.02721	10.3237	10.0431	9.91855	9.72222	9.27762	10.4166	10.2974	10.2206	10.1365	9.72874	10.3882	10.3718	10.3267	10.4577	10.0182
PCA_1-068	10.2136	9.81313	9.60282	9.39861	8.81085	10.3609	9.99552	9.67879	9.30533	8.82275	10.3851	9.84026	9.81873	9.40482	8.92105	10.3599	9.9762	9.94659	9.82055	9.28077	10.3527	10.2447	10.2659	10.198	9.81188	10.425	10.4744	10.434	10.4258	10.0154
PCA_1-069	10.3482	9.93809	9.57354	9.36258	8.76851	10.3307	9.87196	9.75148	9.23379	8.8046	10.5264	9.8795	9.69183	9.49383	9.02219	10.2979	10.0497	9.98632	9.8453	9.2415	10.5167	10.1647	10.2152	10.0881	9.65701	10.3578	10.4519	10.5039	10.4673	9.95829
PCA_1-070	10.3658	9.86048	9.69826	9.40941	8.77192	10.2655	9.866	9.70432	9.35615	8.78796	10.4334	9.85003	9.80444	9.45296	8.88303	10.3636	9.94298	9.94747	9.81562	9.23343	10.4344	10.294	10.3032	10.2346	9.67786	10.4565	10.5076	10.6535	10.4482	10.0262
PCA_1-071	10.2686	9.9792	9.67841	9.3362	8.8181	10.3492	9.89489	9.77043	9.36923	8.70157	10.2283	9.91573	9.83886	9.47025	8.95232	10.4265	10.0828	10.0586	9.79981	9.32055	10.4678	10.1556	10.2331	10.0933	9.77726	10.5103	10.5099	10.5005	10.4702	9.79517
PCA_1-072	10.2882	9.88916	9.6502	9.37524	8.82309	10.3515	9.91074	9.72435	9.3353	8.70644	10.2999	9.94412	9.80231	9.42683	8.96469	10.3872	10.0639	9.98184	9.70802	9.3659	10.4403	10.215	10.2588	10.1107	9.75305	10.4431	10.4697	10.393	10.4686	9.92442
PCA_1-073	10.2813	10.0061	9.6232	9.34844	8.88908	10.3218	10.0235	9.61908	9.28663	8.7481	10.413	9.88372	9.68013	9.52697	8.82827	10.3489	9.99071	9.87322	9.77423	9.23016	10.443	10.2958	10.2723	10.3032	9.65114	10.4018	10.4768	10.4825	10.3187	10.0484
PCA_1-074	10.4065	9.88736	9.51739	9.41532	8.86135	10.3395	9.92349	9.58742	9.3711	8.74046	10.259	9.91608	9.67224	9.46502	8.88735	10.3723	10.0527	9.91148	9.87366	9.29853	10.4525	10.1041	10.2267	10.1906	9.83325	10.3966	10.474	10.408	10.4537	9.99076
PCA_1-075	10.3563	9.91	9.73193	9.47095	8.81536	10.3302	9.90864	9.68372	9.32312	8.94247	10.4183	9.87517	9.74778	9.40285	8.8469	10.4394	10.0298	9.94668	9.76139	9.2658	10.2729	10.2471	10.3677	10.1408	9.77001	10.4317	10.3966	10.5359	10.3546	9.95294
PCA_1-076	10.2745	9.90808	9.48601	9.3699	8.9588	10.3702	9.92195	9.76599	9.30569	8.76111	10.3263	9.99165	9.7166	9.47639	8.89313	10.4218	9.97515	9.90886	9.84254	9.33704	10.3827	10.2447	10.2333	10.1341	9.81495	10.3868	10.3287	10.616	10.4544	9.97397
PCA_1-077	10.2977	10.0747	9.6054	9.42951	8.884	10.3867	10.0661	9.58695	9.45502	8.8452	10.3991	9.87445	9.79603	9.50729	8.91457	10.3617	9.99455	9.94168	9.80462	9.3183	10.4179	10.1766	10.2381	10.1099	9.7558	10.4319	10.5116	10.5139	10.5584	9.92013
PCA_1-078	10.3353	10.0172	9.62505	9.40095	8.99839	10.2796	9.96917	9.57099	9.43959	8.92725	10.4235	9.88985	9.68567	9.38432	9.04111	10.404	10.0643	9.97812	9.85818	9.29643	10.485	10.2206	10.2346	10.1841	9.80684	10.4725	10.4738	10.4652	10.5476	10.0582
PCA_1-079	10.2573	10.0906	9.68631	9.36034	8.93363	10.4128	10.065	9.68207	9.40524	8.88955	10.364	9.91459	9.67903	9.45561	8.78453	10.4542	9.96875	9.84216	9.65951	9.23544	10.4056	10.1381	10.2008	10.0557	9.74259	10.4945	10.4313	10.4108	10.3608	9.81109
PCA_1-080	10.3754	10.1693	9.70542	9.33913	8.81402	10.2792	10.0653	9.6312	9.40779	8.87661	10.4494	9.95329	9.75985	9.42772	8.81477	10.3917	9.96186	9.92471	9.77839	9.23595	10.4601	10.2535	10.2323	10.0099	9.65114	10.4748	10.376	10.5016	10.5056	9.8191
PCA_1-081	10.3778	10.0973	9.6836	9.49288	8.81649	10.295	9.94677	9.63263	9.31884	8.806	10.2911	9.95661	9.63168	9.55978	8.94132	10.4465	10.0254	9.84664	9.84482	9.25125	10.3229	10.1837	10.3549	10.167	9.74862	10.4152	10.4159	10.358	10.4511	9.78127
PCA_1-082	10.4873	10.1312	9.61891	9.36207	8.97681	10.1987	10.0767	9.6423	9.48523	8.92783	10.4004	9.92365	9.74425	9.61436	8.99111	10.4496	10.0756	10.0001	9.67106	9.29307	10.3291	10.1881	10.1864	10.131	9.68796	10.3342	10.3825	10.4822	10.4449	9.89182
PCA_1-083	10.4104	9.97305	9.61362	9.40888	8.93124	10.3586	10.0382	9.73617	9.42936	8.96199	10.4698	9.98141	9.77627	9.50062	8.90378	10.3489	9.98524	10.0132	9.70795	9.21559	10.2867	10.1698	10.2236	10.0761	9.76465	10.4826	10.2833	10.4535	10.4078	9.79508
PCA_1-084	10.3119	10.0717	9.60316	9.3666	8.94021	10.293	9.99097	9.72203	9.46581	8.79903	10.3747	10.014	9.7439	9.5061	9.05724	10.3896	10.0555	10.0369	9.7691	9.34457	10.3714	10.2774	10.4094	10.0902	9.67257	10.4982	10.3396	10.3842	10.3089	9.92732
PCA_1-085	10.4017	9.97275	9.72573	9.44611	8.93376	10.4284	10.0766	9.67309	9.37399	8.82266	10.4711	9.98873	9.825	9.5964	8.94652	10.4288	10.0865	9.95493	9.83409	9.35957	10.4739	10.1803	10.3622	10.1371	9.75097	10.3994	10.3731	10.3859	10.4072	9.75726
PCA_1-086	10.3007	10.0851	9.72283	9.50117	8.90384	10.3866	10.1141	9.71821	9.48366	8.91883	10.4301	10.0692	9.81747	9.4644	9.05662	10.5312	10.0763	10.0973	9.80846	9.43791	10.39	10.2701	10.3131	10.0719	9.68636	10.4446	10.3314	10.4995	10.3781	9.93463
PCA_1-087	10.3157	10.0454	9.61648	9.49677	9.07724	10.3065	9.89865	9.77998	9.5639	8.9432	10.4576	9.97065	9.84155	9.54128	8.91102	10.5032	9.97079	10.0359	9.75127	9.27687	10.4246	10.3038	10.3349	10.1993	9.72238	10.5943	10.3094	10.4043	10.3087	9.88755
PCA_1-088	10.4084	10.0641	9.70601	9.46938	9.05093	10.4525	10.1269	9.74485	9.54037	8.94659	10.3995	10.09	9.93821	9.52468	8.98909	10.4317	9.99682	10.1448	9.79557	9.44807	10.4597	10.3325	10.2982	10.1565	9.58645	10.6333	10.4121	10.3438	10.4426	9.76058
PCA_1-089	10.4026	9.99405	9.79209	9.57174	8.8622	10.4124	9.92795	9.7507	9.42818	8.97523	10.4196	10.02	9.91232	9.48939	9.10121	10.4973	10.0678	10.0498	9.88973	9.35661	10.5153	10.25	10.238	10.1458	9.67626	10.3477	10.4049	10.3906	10.3338	9.92156
PCA_1-090	10.3765	10.0397	9.70062	9.37448	9.04569	10.4055	10.1586	9.93575	9.3676	8.91534	10.5389	9.95037	9.76042	9.49851	9.00704	10.4473	10.05	10.1051	9.85054	9.40409	10.6051	10.2053	10.3542	10.1066	9.77974	10.4318	10.4657	10.4454	10.4148	9.9025
PCA_1-091	10.4847	10.135	9.84393	9.52481	9.11069	10.4295	10.0678	9.73942	9.3512	8.95626	10.5715	9.90547	9.81034	9.53348	9.08357	10.2937	10.0525	10.0605	9.80506	9.37756	10.4544	10.2379	10.1839	10.0905	9.75519	10.4377	10.4165	10.3032	10.4463	9.72468
PCA_1-092	10.4163	10.137	9.78441	9.56499	9.07482	10.4374	10.0943	9.70172	9.47523	8.982	10.3889	10.0172	9.75782	9.62567	9.0262	10.3626	9.98689	10.0863	9.92089	9.46531	10.5103	10.2622	10.129	10.1207	9.63882	10.5214	10.4521	10.3079	10.5099	9.71656
PCA_1-093	10.5879	10.0485	9.7797	9.46014	9.20446	10.5549	10.0219	9.74743	9.46339	9.02555	10.4743	9.88177	9.9096	9.49184	9.17116	10.367	9.97828	10.0569	9.93485	9.42752	10.3791	10.2239	10.3172	10.2932	9.62973	10.4869	10.5364	10.4375	10.4235	9.77807
PCA_1-094	10.395	10.0794	9.75537	9.47517	9.06614	10.4882	10.0455	9.75542	9.39757	8.80731	10.5106	9.93011	9.97033	9.56507	9.09243	10.4374	10.0206	9.9904	9.80615	9.39996	10.3613	10.2756	10.1933	10.1591	9.71622	10.57	10.3856	10.2333	10.2363	9.83272
PCA_1-095	10.3466	10.0454	9.79129	9.49376	9.06517	10.4625	9.95566	9.69488	9.48357	9.03489	10.417	10.018	9.86517	9.49637	9.04227	10.3978	10.0748	9.99791	9.98626	9.32789	10.3321	10.2855	10.0355	10.234	9.65169	10.5578	10.4374	10.2489	10.1865	9.93767
PCA_1-096	10.5277	10.0017	9.88225	9.51138	8.91726	10.4678	10.0405	9.67998	9.51089	8.89944	10.417	9.95268	9.79022	9.49238	9.13433	10.5044	10.0261	10.1411	9.9302	9.46124	10.3466	10.2273	10.2584	10.2602	9.603	10.6036	10.4164	10.2968	10.3483	9.84295
PCA_1-097	10.4142	10.1205	9.70023	9.60396	9.03762	10.5143	10.064	9.79984	9.44442	9.05522	10.5415	10.027	9.88579	9.66332	9.10146	10.4113	10.1576	10.1006	9.76795	9.47296	10.5274	10.1558	10.1313	10.1422	9.74611	10.6201	10.5176	10.2308	10.4701	9.85194
PCA_1-098	10.641	10.1491	9.80088	9.59888	8.98326	10.5075	10.0063	9.87035	9.54116	9.00314	10.4665	10.1301	9.88376	9.51622	8.95783	10.4455	10.121	10.0511	9.97308	9.44859	10.4598	10.3034	10.2317	10.1779	9.69572	10.4825	10.3678	10.235	10.2581	9.92146
PCA_1-099	10.4061	10.2262	9.7175	9.58567	9.07966	10.5166	10.1597	9.77985	9.48862	9.0213	10.5874	10.0286	9.68306	9.52536	9.2014	10.4228	10.1214	10.0616	9.91629	9.57855	10.401	10.2097	10.1958	10.0889	9.65781	10.5632	10.2388	10.2505	10.3224	9.74643
PCA_1-100	10.335	10.0748	9.87995	9.47925	9.032	10.5049	10.0516	9.86971	9.39817	9.06591	10.4713	10.1059	9.76036	9.4342	9.13228	10.4701	10.1086	10.0119	10.0307	9.62718	10.4669	10.0853	10.3068	10.1333	9.77482	10.6049	10.3595	10.3045	10.2601	9.70272

## Sheet: lambda_0.46416
Row	kernel_0mm_parcels_100	kernel_0mm_parcels_200	kernel_0mm_parcels_400	kernel_0mm_parcels_1000	kernel_0mm_vertex	kernel_5mm_parcels_100	kernel_5mm_parcels_200	kernel_5mm_parcels_400	kernel_5mm_parcels_1000	kernel_5mm_vertex	kernel_10mm_parcels_100	kernel_10mm_parcels_200	kernel_10mm_parcels_400	kernel_10mm_parcels_1000	kernel_10mm_vertex	kernel_20mm_parcels_100	kernel_20mm_parcels_200	kernel_20mm_parcels_400	kernel_20mm_parcels_1000	kernel_20mm_vertex	kernel_30mm_parcels_100	kernel_30mm_parcels_200	kernel_30mm_parcels_400	kernel_30mm_parcels_1000	kernel_30mm_vertex	kernel_40mm_parcels_100	kernel_40mm_parcels_200	kernel_40mm_parcels_400	kernel_40mm_parcels_1000	kernel_40mm_vertex
PCA_1-001	12.9344	12.8548	12.8369	12.7994	12.4254	12.99	12.9193	12.9249	12.88	12.665	13.0405	12.945	12.9915	12.9626	12.8071	13.0245	12.9487	12.9855	13.0096	12.883	12.9746	12.9505	12.9613	13.0058	12.8935	12.9773	12.9059	12.9264	12.9784	12.8764
PCA_1-002	12.912	12.8582	12.8031	12.7956	11.7649	12.9958	12.9214	12.8986	12.8721	11.8939	13.0191	12.9591	12.9685	12.9664	12.4109	13.0253	12.9562	12.9879	13.0026	12.8616	12.9619	12.9234	12.9635	13.0289	12.9157	12.9428	12.9288	12.9286	12.9639	12.8833
PCA_1-003	12.5717	12.2116	11.8669	11.5679	11.7497	12.6032	12.2377	11.9368	11.5607	11.8005	12.5425	12.2713	12.0224	11.6883	11.8334	12.548	12.3264	12.2344	11.9719	12.1581	12.5884	12.4088	12.2818	12.1424	12.2936	12.5595	12.3944	12.3408	12.2541	12.3179
PCA_1-004	11.8967	11.7345	11.7954	11.5645	10.8715	11.9578	11.8505	11.8832	11.5629	10.8737	12.0921	11.9555	11.9834	11.6886	11.056	12.1158	12.1005	12.0952	11.9415	11.7869	12.121	12.1751	12.1378	12.0387	11.8426	12.1527	12.1835	12.1046	12.059	11.8919
PCA_1-005	11.9136	11.6729	11.6322	11.1844	10.3362	12.0316	11.7783	11.7179	11.2744	10.6141	12.0468	11.8592	11.8582	11.5927	11.0111	12.0647	12.022	12.0446	11.9328	11.7561	12.0648	12.0476	12.0735	12.0021	11.8631	12.0732	12.0404	12.0831	12.0349	11.8644
PCA_1-006	11.9109	11.5819	11.3728	10.5152	10.1871	11.9449	11.716	11.5475	10.7461	10.5921	12.0374	11.8675	11.7276	11.4948	10.9371	12.02	12.0037	12.0337	11.9221	11.7536	12.0545	12.0732	12.0957	12.0291	11.845	12.0648	12.0254	12.1074	12.0611	11.8627
PCA_1-007	11.708	11.3931	11.0288	10.5785	10.0537	11.808	11.6605	11.0954	10.601	10.0864	11.9455	11.8346	11.6494	10.9664	10.0971	12.0182	12.0148	12.0074	11.9211	11.4777	12.0298	12.0608	12.1189	12.0249	11.7388	12.0054	12.0727	12.0789	12.029	11.8938
PCA_1-008	11.7209	11.207	10.994	10.5177	10.07	11.7948	11.3411	11.0477	10.5712	10.0357	11.9211	11.6385	11.2508	10.8655	10.1544	12.0217	11.9903	11.8777	11.7414	11.416	12.0056	11.9979	12.0171	11.8742	11.6975	12.0186	12.0903	12.0466	12.0027	11.7063
PCA_1-009	11.7414	11.1788	11.0119	10.5365	10.093	11.8344	11.2797	11.0244	10.5686	10.07	11.9554	11.4888	11.2093	10.8081	10.1144	12.0515	11.8914	11.6062	11.4432	11.0966	12.0336	12.0013	11.9591	11.8552	11.652	12.0116	12.0888	12.0429	11.9723	11.7308
PCA_1-010	11.6612	11.0695	10.7474	10.6159	10.1285	11.721	11.0723	10.7674	10.5237	10.1144	11.7458	11.1327	10.8886	10.6422	10.0644	11.879	11.5482	11.2631	11.0678	10.843	12.0787	11.9124	11.5163	11.432	11.2678	12.0296	12.0126	11.7493	11.7329	11.7688
PCA_1-011	11.501	11.0119	10.7519	10.5464	10.1196	11.7282	11.0889	10.8208	10.557	10.0279	11.7595	11.1598	10.9124	10.6467	10.1001	11.6285	11.4969	11.188	11.0734	10.7924	11.6574	11.9061	11.4933	11.4312	11.1977	11.9903	12.0568	11.6391	11.6613	11.3877
PCA_1-012	11.4863	11.0358	10.7598	10.5303	10.064	11.5757	11.0807	10.7672	10.57	10.0156	11.6673	11.1648	10.8918	10.6673	10.0761	11.6153	11.3614	11.1905	11.0347	10.8357	11.6209	11.5156	11.4947	11.3677	11.2181	11.6869	11.5938	11.6314	11.5925	11.3867
PCA_1-013	11.5331	11.0696	10.7549	10.5699	9.95006	11.5785	11.0891	10.8178	10.5855	9.85059	11.5853	11.1614	10.9363	10.6865	10.0173	11.6925	11.3059	11.206	11.0628	10.8131	11.5785	11.5208	11.476	11.3579	11.2685	11.6172	11.5937	11.6086	11.5793	11.322
PCA_1-014	11.4955	10.8988	10.7085	10.3496	9.952	11.611	10.914	10.8151	10.5464	9.8503	11.5961	11.0437	10.873	10.6427	10.0595	11.6637	11.2382	11.1195	10.9992	10.7749	11.5818	11.3943	11.3186	11.2291	11.2226	11.6414	11.5328	11.3958	11.3464	11.4254
PCA_1-015	11.5441	10.9237	10.7248	10.3486	9.98032	11.5741	10.9346	10.7812	10.4735	9.81798	11.6353	11.0605	10.8889	10.634	9.97828	11.6271	11.1992	11.1681	10.9737	10.8012	11.5793	11.4066	11.3748	11.2958	11.2081	11.5615	11.4739	11.4177	11.3516	11.3299
PCA_1-016	11.4145	10.9261	10.485	10.29	9.79308	11.505	10.9945	10.6126	10.2077	9.85682	11.4784	11.0747	10.8976	10.6095	9.96977	11.5059	11.2383	11.155	11.001	10.7881	11.5487	11.3935	11.3044	11.2515	11.1499	11.566	11.4507	11.3902	11.3869	11.334
PCA_1-017	11.3846	10.9053	10.5034	10.1863	9.84581	11.4625	10.9853	10.6738	10.1799	9.76137	11.5024	11.0473	10.8797	10.543	9.97075	11.5224	11.2305	11.1241	11.0118	10.7178	11.5819	11.3969	11.3215	11.2688	11.2036	11.5374	11.5476	11.4429	11.4017	11.2666
PCA_1-018	11.4163	10.9631	10.5086	10.1759	9.80939	11.4728	10.9927	10.5981	10.2593	9.83378	11.4803	11.0411	10.8374	10.5186	9.9371	11.4822	11.2056	11.1499	10.9979	10.6946	11.5809	11.3794	11.2964	11.2484	11.1938	11.5522	11.5119	11.4302	11.4296	11.3436
PCA_1-019	11.4204	10.9332	10.4982	10.1064	9.77461	11.4665	11.0159	10.5391	10.144	9.84395	11.4795	11.0901	10.8737	10.4231	9.93539	11.5006	11.2896	11.1409	10.9987	10.5004	11.4656	11.3923	11.3274	11.271	11.1609	11.5803	11.435	11.3857	11.3555	11.2236
PCA_1-020	11.3669	10.8383	10.4314	10.1589	9.73399	11.4282	10.9686	10.5098	10.226	9.83636	11.5429	11.0746	10.7723	10.4809	9.97733	11.5229	11.2669	11.1177	11.0467	10.5097	11.5585	11.3245	11.3007	11.3072	11.1954	11.5248	11.4763	11.359	11.3362	11.2232
PCA_1-021	11.2921	10.8935	10.4297	10.1718	9.72488	11.5033	10.9571	10.523	10.2147	9.8105	11.5328	11.0519	10.7878	10.4609	9.99563	11.4796	11.2325	11.1498	11.0201	10.4933	11.5287	11.4091	11.3527	11.2884	11.1483	11.6106	11.4089	11.4019	11.3545	11.2673
PCA_1-022	11.2658	10.8329	10.4786	10.1833	9.7807	11.3634	10.8776	10.5251	10.2048	9.78792	11.513	11.0422	10.6576	10.4242	9.97491	11.5745	11.3506	11.2028	11.0344	10.5253	11.5435	11.3514	11.3016	11.3232	11.0823	11.5397	11.4065	11.3781	11.3763	11.1739
PCA_1-023	11.2777	10.8585	10.4793	10.1823	9.83626	11.3563	10.931	10.5639	10.2026	9.79646	11.4744	10.9984	10.6501	10.3462	10.0293	11.4901	11.1719	11.0642	11.0093	10.5432	11.4929	11.3584	11.2721	11.294	11.1197	11.5637	11.4718	11.4117	11.3554	11.1842
PCA_1-024	11.2393	10.8772	10.4479	10.1261	9.76981	11.2999	10.8854	10.5864	10.1456	9.80202	11.5031	10.9843	10.7219	10.393	9.93782	11.4549	11.1643	10.9989	10.8448	10.5276	11.5041	11.3386	11.2978	11.2258	11.0133	11.4891	11.4553	11.3946	11.419	11.1945
PCA_1-025	11.2011	10.8464	10.5397	10.1503	9.73777	11.3278	10.9527	10.5491	10.122	9.82738	11.4733	10.9452	10.6716	10.3098	9.96384	11.5288	11.169	10.9862	10.8594	10.5043	11.478	11.3319	11.2254	11.2844	10.9182	11.5661	11.3985	11.3593	11.3407	11.2469
PCA_1-026	11.2479	10.7849	10.4246	10.1439	9.68573	11.2831	10.8737	10.5108	10.0996	9.85607	11.4166	10.9683	10.7448	10.3316	9.97726	11.4519	11.2202	11.0159	10.8633	10.4904	11.518	11.4148	11.3004	11.2104	10.9335	11.4609	11.4421	11.3399	11.3684	11.2131
PCA_1-027	11.1736	10.792	10.3761	10.1661	9.76299	11.3157	10.8816	10.5735	10.1736	9.90309	11.4108	10.9254	10.6914	10.2918	9.96062	11.4118	11.2106	11.0252	10.9972	10.5578	11.4823	11.384	11.2857	11.3001	10.8102	11.5473	11.4592	11.4384	11.4935	11.2197
PCA_1-028	11.1416	10.7949	10.416	10.15	9.7788	11.29	10.7831	10.5353	10.1808	9.8661	11.3951	10.8097	10.6575	10.2946	10.0123	11.4022	11.1868	11.0487	10.8686	10.4827	11.4627	11.349	11.2263	11.2839	10.8765	11.538	11.4251	11.3391	11.4002	11.2306
PCA_1-029	11.161	10.6678	10.4672	10.1531	9.8317	11.1948	10.8244	10.5988	10.1692	9.83824	11.2604	10.8828	10.7349	10.2865	9.96927	11.4672	11.2273	11.0047	10.7201	10.4259	11.4373	11.4057	11.2182	11.2383	10.8798	11.5363	11.4128	11.3917	11.3902	11.138
PCA_1-030	11.1308	10.6674	10.406	10.1259	9.74465	11.2039	10.7075	10.4468	10.1762	9.87051	11.3308	10.8051	10.6859	10.2939	10.0063	11.4291	11.2258	11.0338	10.8242	10.4646	11.4412	11.3859	11.2547	11.2118	10.9129	11.5017	11.5054	11.4013	11.2999	11.1993
PCA_1-031	11.145	10.6868	10.4128	10.1748	9.74372	11.2503	10.6553	10.4986	10.1429	9.83026	11.2508	10.827	10.7343	10.2972	9.99417	11.3187	11.146	11.0152	10.7693	10.5001	11.4389	11.3668	11.3015	11.0993	10.8908	11.5139	11.4254	11.3932	11.2315	11.2148
PCA_1-032	11.1395	10.6852	10.3809	10.1846	9.74992	11.1505	10.7024	10.4861	10.098	9.86194	11.3114	10.797	10.697	10.2547	9.97812	11.3261	11.138	10.9835	10.8144	10.4042	11.5029	11.4154	11.2685	11.1679	10.832	11.4337	11.5128	11.3322	11.3226	11.1405
PCA_1-033	11.1479	10.668	10.3906	10.1396	9.83418	11.1254	10.7588	10.4358	10.2059	9.85602	11.2162	10.8237	10.6453	10.2803	9.99697	11.3549	11.149	11.0487	10.7551	10.4923	11.4377	11.3337	11.2928	11.1684	10.9019	11.4912	11.445	11.4485	11.2626	11.1383
PCA_1-034	11.1019	10.683	10.4237	10.2282	9.86163	11.1966	10.733	10.4928	10.1682	9.81982	11.2458	10.943	10.6676	10.2114	9.98194	11.3639	11.1681	11.0919	10.8239	10.3777	11.4238	11.3658	11.2073	11.1399	10.8819	11.5566	11.4901	11.3582	11.2805	11.1906
PCA_1-035	11.1823	10.7285	10.4076	10.2014	9.75755	11.2232	10.7509	10.4685	10.0845	9.8129	11.3437	10.8144	10.5648	10.237	9.91046	11.2997	11.129	11.0128	10.7755	10.3959	11.4653	11.3755	11.2329	11.2031	10.9133	11.4035	11.4984	11.3117	11.2884	10.9395
PCA_1-036	11.0445	10.795	10.4006	10.1916	9.83634	11.2121	10.8353	10.4204	10.1954	9.88453	11.2498	10.7889	10.4078	10.2531	9.89197	11.358	11.0866	10.8653	10.8106	10.4364	11.4862	11.3032	11.2422	11.1355	10.853	11.379	11.5014	11.3482	11.3738	11.0322
PCA_1-037	11.1444	10.6858	10.4718	10.1153	9.73625	11.1524	10.7487	10.4368	10.1853	9.85727	11.3161	10.6809	10.4604	10.2695	9.84449	11.3449	11.06	10.8874	10.7141	10.3718	11.3953	11.354	11.2395	11.1182	10.8125	11.3915	11.4968	11.4109	11.2983	10.881
PCA_1-038	11.1034	10.7225	10.4021	10.1803	9.82656	11.1531	10.8066	10.3764	10.184	9.83373	11.3102	10.7558	10.5067	10.2595	9.9495	11.328	10.9353	10.7638	10.7241	10.4602	11.3791	11.3432	11.2539	11.0617	10.8707	11.4327	11.5342	11.3898	11.2704	10.8885
PCA_1-039	11.1198	10.7562	10.4422	10.2103	9.78176	11.2052	10.7891	10.4984	10.1854	9.83228	11.2897	10.8469	10.5521	10.2848	9.89723	11.5048	10.9768	10.8695	10.7719	10.4109	11.4644	11.3664	11.3172	11.1767	10.831	11.4374	11.4421	11.3925	11.2806	10.8004
PCA_1-040	11.1539	10.7199	10.4168	10.2042	9.84202	11.2878	10.7886	10.4207	10.2273	9.81609	11.3132	10.8343	10.4887	10.2479	9.82802	11.3786	10.9573	10.8122	10.7559	10.4542	11.3364	11.2429	11.2292	11.1794	10.7914	11.3997	11.4903	11.3586	11.3324	10.8628
PCA_1-041	11.2436	10.7406	10.4756	10.2449	9.78489	11.1696	10.7704	10.4565	10.2531	9.80456	11.3103	10.7112	10.4888	10.2519	9.92374	11.3902	11.0072	10.8937	10.7647	10.4418	11.3698	11.1975	11.0819	11.1545	10.8537	11.4399	11.4818	11.3583	11.2835	10.8656
PCA_1-042	11.1992	10.7554	10.4567	10.1927	9.88003	11.2519	10.792	10.4667	10.1512	9.70209	11.428	10.7753	10.5147	10.3439	9.90726	11.4252	11.0211	10.8539	10.7508	10.356	11.4002	11.3007	11.0997	11.1256	10.7669	11.4707	11.4651	11.3626	11.3892	10.9308
PCA_1-043	11.1661	10.739	10.4461	10.3098	9.86148	11.2042	10.8212	10.4868	10.1282	9.72961	11.2404	10.8	10.4682	10.2369	9.91785	11.3365	10.9467	10.8161	10.693	10.3287	11.3501	11.1055	11.1062	10.9814	10.7867	11.4837	11.4743	11.3478	11.3633	10.8589
PCA_1-044	11.2118	10.8034	10.4735	10.1855	9.82703	11.2226	10.7982	10.4675	10.2254	9.914	11.3013	10.7232	10.5862	10.2844	9.94776	11.3445	10.8711	10.8291	10.6323	10.3277	11.3822	11.1696	11.1353	11.0104	10.8184	11.3636	11.3609	11.3532	11.2176	10.9084
PCA_1-045	11.162	10.8392	10.4859	10.258	9.86576	11.2579	10.7675	10.4679	10.2177	9.72335	11.2653	10.7487	10.4935	10.2994	9.83208	11.385	10.9456	10.7987	10.7425	10.4418	11.2894	11.0956	11.0887	10.9896	10.774	11.3161	11.3662	11.2552	11.1063	10.9006
PCA_1-046	11.2137	10.6323	10.4442	10.2866	9.84708	11.2237	10.7507	10.568	10.1883	9.84312	11.3955	10.7156	10.5754	10.2382	9.87417	11.4018	11.0117	10.7354	10.6643	10.3649	11.3235	11.123	11.1145	11.0541	10.7338	11.2761	11.1261	11.1954	11.1819	10.866
PCA_1-047	11.1138	10.7871	10.4647	10.2492	9.86733	11.2178	10.7513	10.5131	10.2271	9.75171	11.2159	10.7539	10.5109	10.3216	9.89468	11.3952	10.8341	10.726	10.6537	10.361	11.3205	11.1235	11.1262	10.9422	10.799	11.2761	11.2496	11.2428	11.1806	10.8319
PCA_1-048	11.2206	10.7162	10.5309	10.1676	9.91878	11.3043	10.8012	10.5072	10.2051	9.88058	11.3646	10.7562	10.519	10.2574	9.8917	11.2429	10.9272	10.8362	10.6053	10.2864	11.3974	11.1034	11.0277	11.0332	10.7145	11.3118	11.1666	11.2242	11.2164	10.8387
PCA_1-049	11.1786	10.8227	10.4438	10.1843	9.90565	11.2437	10.7795	10.5779	10.195	9.787	11.2871	10.7049	10.4903	10.2816	9.87191	11.1901	10.9636	10.8607	10.5744	10.2821	11.3306	11.0788	11.054	11.067	10.7367	11.2006	11.1782	11.1862	11.1722	10.8329
PCA_1-050	11.2037	10.8113	10.533	10.2105	9.89031	11.327	10.7544	10.4713	10.16	9.74234	11.2276	10.7452	10.5765	10.2293	9.97064	11.22	10.7856	10.8316	10.6986	10.2792	11.279	11.1436	11.0182	10.9926	10.7586	11.2585	11.3067	11.1492	11.1316	10.8232
PCA_1-051	11.1696	10.7617	10.573	10.241	9.89086	11.167	10.7428	10.4879	10.1595	9.85869	11.2371	10.717	10.5181	10.2431	9.93123	11.2358	10.9441	10.837	10.6872	10.2638	11.2854	11.0987	11.0177	11.0168	10.8225	11.2547	11.1857	11.1874	11.1662	10.7516
PCA_1-052	11.1687	10.7709	10.5659	10.2297	9.89308	11.1755	10.8105	10.6212	10.1398	9.81016	11.2353	10.812	10.535	10.215	9.87966	11.3346	10.8203	10.8209	10.669	10.3029	11.2107	11.1632	11.108	11.1295	10.8233	11.3596	11.1765	11.167	11.2035	10.7495
PCA_1-053	11.2323	10.7318	10.5007	10.2645	9.97745	11.2242	10.6868	10.6215	10.2009	9.80102	11.2174	10.6981	10.5396	10.2016	9.86437	11.1598	10.8483	10.7454	10.7542	10.2819	11.2394	11.1425	11.1515	11.1407	10.8337	11.2026	11.1373	11.1598	11.145	10.8425
PCA_1-054	11.1649	10.827	10.5102	10.2102	9.96363	11.1055	10.7219	10.5107	10.158	9.82169	11.2187	10.7036	10.578	10.3652	9.93268	11.1688	10.7876	10.6769	10.6627	10.271	11.1527	11.0081	11.0555	10.9694	10.7799	11.1987	11.1991	11.1649	11.2741	10.7381
PCA_1-055	11.1656	10.8604	10.4903	10.2186	9.95981	11.1636	10.7686	10.4717	10.1998	9.84172	11.1977	10.7334	10.576	10.277	9.87525	11.2384	10.8158	10.7393	10.662	10.3068	11.1739	11.0742	11.1107	10.9811	10.8203	11.2374	11.2847	11.1758	11.203	10.7389
PCA_1-056	11.2097	10.7615	10.5789	10.3285	9.99259	11.3702	10.8356	10.5388	10.2081	9.82664	11.1994	10.7756	10.5763	10.184	10.0429	11.2301	10.889	10.7666	10.6525	10.228	11.1473	11.1577	11.0534	10.9958	10.6228	11.2232	11.1526	11.1943	11.2193	10.8349
PCA_1-057	11.2319	10.7187	10.5576	10.2677	9.95777	11.2816	10.7403	10.4151	10.1415	9.81407	11.2461	10.7745	10.537	10.2324	10.0014	11.1616	10.8752	10.7721	10.6229	10.2627	11.06	11.1194	11.0177	11.2375	10.7037	11.1404	11.1919	11.1477	11.2232	10.7294
PCA_1-058	11.1852	10.7555	10.5217	10.2357	9.91347	11.2555	10.6809	10.5728	10.1886	9.86008	11.2513	10.7815	10.5217	10.1786	10.0343	11.1281	10.8983	10.7415	10.5563	10.2733	11.1161	11.0127	11.1444	11.0438	10.7585	11.1148	11.2055	11.1584	11.2028	10.79
PCA_1-059	11.1886	10.7213	10.5242	10.1841	10.0036	11.1929	10.7884	10.4835	10.192	9.83423	11.2023	10.7122	10.5839	10.2373	9.85624	11.1553	10.9158	10.7869	10.7073	10.2568	11.1196	11.0984	11.0102	11.0851	10.741	11.0959	11.1564	11.1928	11.1445	10.8888
PCA_1-060	11.1721	10.8144	10.456	10.3069	9.87223	11.1648	10.838	10.5213	10.1326	9.83814	11.145	10.8187	10.5967	10.2635	9.98981	11.105	10.9298	10.7917	10.6614	10.197	11.1531	11.1607	11.0237	10.9841	10.7575	11.1413	11.2316	11.0409	11.2491	10.71
PCA_1-061	11.1911	10.6456	10.5484	10.2344	9.80844	11.1933	10.7635	10.559	10.2061	9.82465	11.1234	10.7542	10.6044	10.2692	9.95045	11.0594	10.8506	10.6448	10.7252	10.2304	11.1381	11.119	11.1428	11.0643	10.7228	11.1322	11.1218	11.1618	11.2352	10.8089
PCA_1-062	11.157	10.7774	10.5024	10.3911	9.79309	11.2458	10.755	10.534	10.2792	9.79695	11.1177	10.7278	10.5426	10.4124	9.94736	11.0961	10.8823	10.7757	10.6023	10.2448	11.1905	11.1357	11.1005	11.1013	10.6462	11.1505	11.1745	11.2042	11.3001	10.7781
PCA_1-063	11.0654	10.7696	10.5812	10.2964	9.82123	11.2356	10.86	10.6655	10.1608	9.89861	11.1848	10.7379	10.5571	10.2635	9.96202	11.1481	10.8721	10.833	10.7108	10.3074	11.1859	11.1482	11.0743	11.1155	10.6354	11.221	11.2325	11.1986	11.2606	10.8949
PCA_1-064	11.1052	10.7909	10.5354	10.2631	9.87764	11.045	10.8384	10.6011	10.1529	9.78237	11.1132	10.8295	10.6003	10.2686	9.94452	11.1929	10.8111	10.7665	10.6925	10.3092	11.2657	11.1447	11.0463	10.9322	10.6482	11.1839	11.2524	11.1184	11.2174	10.8619
PCA_1-065	10.9812	10.698	10.6597	10.2892	9.96927	11.0353	10.728	10.6544	10.2301	9.93699	11.2674	10.7302	10.635	10.3149	10.0023	11.1239	10.8999	10.8882	10.7402	10.2068	11.1213	11.1904	11.0974	10.9859	10.6143	11.26	11.1422	11.2387	11.1484	10.7489
PCA_1-066	11.1576	10.703	10.5484	10.4486	9.84265	11.1271	10.7236	10.5589	10.2798	9.87177	11.1447	10.7396	10.5735	10.3434	9.98265	11.1428	10.8695	10.8546	10.5826	10.2533	11.0891	11.1254	11.0427	10.8935	10.6433	11.1247	11.1918	11.3384	11.1446	10.775
PCA_1-067	11.0544	10.729	10.4945	10.4474	9.94286	11.0882	10.7116	10.6019	10.308	9.85842	11.3775	10.7075	10.638	10.3579	9.95196	11.2015	10.8458	10.8287	10.5941	10.1687	11.2458	11.005	11.0126	10.9468	10.6807	11.1806	11.1742	11.1432	11.2402	10.7981
PCA_1-068	10.9962	10.7167	10.5783	10.302	9.97859	11.0883	10.7883	10.5264	10.3355	9.88942	11.1712	10.849	10.6355	10.3105	10.0344	11.1601	10.8131	10.7005	10.5821	10.2837	11.2477	11.0385	11.01	10.9453	10.563	11.1934	11.2041	11.1858	11.2104	10.8167
PCA_1-069	11.0279	10.7856	10.4916	10.2341	9.84544	11.1595	10.837	10.556	10.2429	9.84227	11.2493	10.7692	10.5336	10.3921	10.0473	11.1719	10.8511	10.7951	10.723	10.3383	11.2237	11.0721	10.9769	11.0448	10.6012	11.1881	11.178	11.05	11.1636	10.7599
PCA_1-070	11.0949	10.7509	10.5614	10.2558	9.9027	11.1272	10.6968	10.6335	10.285	9.96287	11.1568	10.6966	10.6488	10.3532	9.98385	11.2021	10.8012	10.8706	10.6749	10.2809	11.1788	11.0599	10.9624	10.9977	10.5488	11.2877	11.229	11.1396	11.2001	10.8778
PCA_1-071	11.0642	10.7717	10.6372	10.3696	9.92692	11.0926	11.0247	10.6216	10.3207	9.83911	11.0937	10.7103	10.6418	10.5163	10.0979	11.1533	10.884	10.8117	10.6429	10.3092	11.1535	11.0813	11.0154	10.9403	10.5833	11.2521	11.2473	11.1727	11.1832	10.7663
PCA_1-072	11.0686	10.6725	10.5416	10.3501	9.8674	11.0066	10.7336	10.5733	10.3316	9.94172	11.031	10.8931	10.6394	10.386	10.0041	11.1081	10.8916	10.7561	10.6349	10.2779	11.1435	11.02	11.0262	10.8124	10.6396	11.2863	11.3148	11.1985	11.154	10.7186
PCA_1-073	11.0916	10.8785	10.4933	10.2735	9.91425	10.9876	10.8172	10.5124	10.357	9.95542	11.1156	10.7542	10.7706	10.3735	9.93164	11.2055	10.8324	10.7614	10.652	10.4034	11.1338	10.9941	11.0198	10.8708	10.6774	11.1102	11.191	11.2761	11.2155	10.9904
PCA_1-074	11.1211	10.9075	10.6399	10.4287	10.0039	11.0585	10.8416	10.5793	10.3447	9.8498	11.0548	10.842	10.6186	10.3949	9.96789	11.1725	10.8703	10.878	10.6671	10.2888	11.1094	10.9595	11.1512	10.8775	10.6581	11.1329	11.1361	11.2678	11.2696	10.8608
PCA_1-075	11.0334	10.8654	10.5917	10.3949	9.98274	11.124	11.0268	10.5882	10.3225	9.94787	11.1551	10.8644	10.6704	10.3114	10.0351	11.138	10.8824	10.7796	10.7438	10.3024	11.2669	10.9955	11.0451	10.9683	10.6862	11.258	11.2643	11.2885	11.0342	10.8015
PCA_1-076	11.0703	10.8578	10.4998	10.3307	9.94066	11.1027	10.8452	10.5083	10.2945	9.92218	11.1655	10.8588	10.5569	10.4418	9.94831	11.0902	10.9347	10.7347	10.6538	10.2632	11.2345	10.9418	11.0151	11.025	10.5698	11.1858	11.0506	11.2753	11.2482	10.797
PCA_1-077	11.0403	10.8639	10.5068	10.3567	10.0097	11.0621	10.9577	10.7125	10.3518	9.95279	11.1347	10.9067	10.5728	10.3413	10.0221	11.2297	10.8244	10.8583	10.698	10.3279	11.25	10.9109	11.0755	10.9418	10.5758	11.2438	11.1561	11.3294	11.1132	10.7682
PCA_1-078	11.071	10.8507	10.62	10.4273	9.97577	11.0964	10.8794	10.4909	10.2932	9.97432	11.0984	10.764	10.6117	10.4497	9.98703	11.1187	10.7907	10.8121	10.5862	10.3207	11.1402	11.0092	11.0574	10.8693	10.6784	11.1432	11.1835	11.2862	11.1294	10.834
PCA_1-079	11.0803	10.8336	10.6582	10.3192	9.9263	11.1748	10.895	10.6212	10.4711	10.0024	11.1498	10.722	10.7225	10.4515	10.0097	11.1191	10.8185	10.8559	10.6708	10.2435	11.1793	10.9414	11.0684	11.1202	10.6421	11.2246	11.1966	11.2453	11.263	10.8467
PCA_1-080	11.1104	10.9143	10.5319	10.364	10.0309	11.1029	11.006	10.4521	10.3745	9.97048	11.1847	10.8293	10.6623	10.7341	10.0093	11.2526	10.8482	10.8648	10.6634	10.2664	11.0788	10.984	11.0536	10.8496	10.699	11.1266	11.158	11.1606	11.2304	10.7415
PCA_1-081	11.1924	10.8849	10.5974	10.4678	9.98012	11.0913	10.9779	10.5997	10.303	10.0116	11.2141	10.8209	10.682	10.3688	9.90992	11.1621	10.865	10.7824	10.6929	10.3292	11.1705	11.0505	11.0336	10.8883	10.7457	11.1612	11.1584	11.2756	11.124	10.7856
PCA_1-082	11.2511	10.9465	10.6207	10.3482	10.1039	11.2239	10.9216	10.6099	10.3914	10.0246	11.178	10.897	10.7108	10.5382	9.95308	11.2004	10.9056	10.7924	10.5913	10.26	11.1897	11.02	11.002	11.0371	10.5825	11.1916	11.2876	11.2313	11.1131	10.7221
PCA_1-083	11.1422	10.783	10.5816	10.4506	10.1233	11.1158	10.9611	10.5742	10.3588	10.1559	11.2019	10.8591	10.6226	10.5662	10.0664	11.1439	10.957	10.8561	10.6264	10.2967	11.1503	11.0895	11.1187	10.9847	10.7097	11.2333	11.1735	11.0982	11.1423	10.754
PCA_1-084	11.1642	10.8696	10.5562	10.5215	10.0231	11.0905	10.9068	10.5385	10.4018	9.95978	11.1284	10.8925	10.6254	10.5476	10.0644	11.1752	10.8715	10.8606	10.7272	10.3879	11.209	10.9807	10.9774	10.9319	10.6281	11.179	11.1708	11.2024	11.1505	10.7451
PCA_1-085	11.263	10.8522	10.5991	10.3993	9.98049	11.0929	10.8229	10.6919	10.3256	9.99221	11.3091	10.8941	10.6706	10.4221	10.0921	11.1285	10.8904	10.8308	10.6704	10.2963	11.3574	11.0158	11.1322	10.9933	10.5089	11.1991	11.0716	11.1617	11.183	10.7116
PCA_1-086	11.1225	10.91	10.6456	10.5791	10.1469	11.2826	10.9327	10.6606	10.4852	10.0683	11.1699	10.9332	10.6686	10.4924	10.0831	11.2362	10.9357	10.7336	10.7226	10.3671	11.2564	11.0687	11.0041	10.9499	10.7268	11.2193	11.1471	11.2312	11.1646	10.7097
PCA_1-087	11.2428	11.0317	10.5857	10.455	10.1385	11.2528	10.853	10.5604	10.511	9.96501	11.193	10.8779	10.6202	10.4016	10.043	11.1678	10.8156	10.9383	10.7734	10.338	11.2024	11.0447	11.1729	11.0133	10.6421	11.189	11.165	11.245	11.2196	10.8372
PCA_1-088	11.1302	10.8968	10.7044	10.4554	10.1925	11.2208	11.0002	10.6287	10.4814	10.0003	11.2407	10.8594	10.739	10.6071	10.1325	11.1779	10.8416	10.9198	10.7889	10.3252	11.3014	10.9987	11.1216	11.0491	10.5722	11.1792	11.3184	11.2652	11.202	10.7495
PCA_1-089	11.2164	10.8956	10.6458	10.4621	10.0817	11.1714	10.943	10.6257	10.3789	10.0716	11.1961	10.9603	10.7358	10.5954	10.1512	11.1592	10.8736	10.859	10.8116	10.3538	11.1176	11.0798	11.0414	11.0178	10.6332	11.3344	11.2702	11.1922	11.2657	10.6914
PCA_1-090	11.2606	11.0441	10.7906	10.5197	10.1635	11.2415	10.9081	10.6741	10.3645	9.95076	11.3355	10.7512	10.7358	10.4629	10.0942	11.1572	10.8942	10.9227	10.8657	10.3988	11.2067	11.0995	11.0422	10.831	10.6323	11.2715	11.2492	11.229	11.2124	10.9147
PCA_1-091	11.2344	11.0463	10.6104	10.4586	10.1268	11.2451	10.8433	10.6858	10.4999	10.1462	11.3547	10.8852	10.7149	10.5075	10.1614	11.1937	11.0044	10.934	10.8228	10.3934	11.2713	11.1407	11.0284	10.9983	10.5829	11.4058	11.2931	11.0974	11.194	10.8545
PCA_1-092	11.285	10.9525	10.6514	10.5346	10.1172	11.3136	10.8562	10.6458	10.5067	10.1114	11.3132	10.8206	10.7122	10.5929	10.0512	11.2822	10.9384	10.904	10.7761	10.4134	11.278	11.0125	11.0138	11.0333	10.6281	11.1534	11.2142	11.0895	11.2045	10.7717
PCA_1-093	11.2535	10.8928	10.7104	10.4848	10.0717	11.1853	10.9701	10.8076	10.5134	10.0035	11.2685	10.8379	10.8399	10.5679	10.2128	11.1949	10.916	10.9939	10.7994	10.2992	11.2679	11.1546	10.9942	10.9767	10.6454	11.2755	11.1704	11.0486	11.1488	10.785
PCA_1-094	11.3371	10.8386	10.7748	10.4736	10.2605	11.2591	10.9731	10.6254	10.4357	10.0378	11.3028	10.8977	10.7557	10.5447	10.2317	11.167	10.8739	11.0097	10.8642	10.3319	11.1816	10.981	11.0191	10.9952	10.6268	11.1937	11.2783	11.1194	11.1104	10.7491
PCA_1-095	11.1289	10.9907	10.6798	10.4244	10.1648	11.2047	10.8908	10.5673	10.5939	10.0919	11.2451	10.8758	10.7106	10.4509	10.1761	11.2482	10.9357	10.8595	10.7991	10.333	11.2615	11.1882	10.9916	10.9856	10.7437	11.2922	11.1579	11.1844	11.0512	10.8152
PCA_1-096	11.2091	10.8661	10.6955	10.4993	10.0769	11.1445	10.9235	10.6874	10.4626	10.1467	11.1568	10.9338	10.8351	10.5453	10.2351	11.2768	10.8805	10.9897	10.7839	10.3742	11.2133	11.0135	10.905	10.944	10.6973	11.1808	11.2003	11.083	11.1615	10.7258
PCA_1-097	11.2166	10.9477	10.6031	10.6209	10.2299	11.2917	10.9323	10.7239	10.4235	10.1894	11.2282	10.9396	10.7867	10.5364	10.164	11.337	10.9294	10.9056	10.8649	10.3998	11.1624	11.1286	11.0559	11.0173	10.5275	11.2992	11.2406	11.2343	11.1274	10.8999
PCA_1-098	11.2391	10.851	10.7074	10.656	10.3454	11.2745	10.8825	10.7816	10.5033	10.0279	11.2966	10.8791	10.6863	10.5599	10.1497	11.227	10.991	10.8845	10.8353	10.4461	11.1854	10.9586	11.0585	10.9266	10.6691	11.2802	11.2523	11.0978	11.1308	10.739
PCA_1-099	11.2362	11.0016	10.8916	10.5038	10.2774	11.2587	11.0586	10.6772	10.414	10.0556	11.2308	10.864	10.7916	10.5423	10.1392	11.257	10.9697	10.9195	10.8847	10.4244	11.2705	11.1252	11.0316	10.9735	10.6364	11.2486	11.2113	11.3122	11.0464	10.6697
PCA_1-100	11.2299	10.9197	10.6398	10.5442	10.2483	11.2055	10.8544	10.8212	10.4826	10.2509	11.2614	10.9197	10.5518	10.561	10.1834	11.1408	10.9298	10.9593	10.8468	10.5892	11.1677	11.034	11.05	10.9865	10.7217	11.3182	11.0945	11.2286	11.2366	10.7137

## Sheet: lambda_1
Row	kernel_0mm_parcels_100	kernel_0mm_parcels_200	kernel_0mm_parcels_400	kernel_0mm_parcels_1000	kernel_0mm_vertex	kernel_5mm_parcels_100	kernel_5mm_parcels_200	kernel_5mm_parcels_400	kernel_5mm_parcels_1000	kernel_5mm_vertex	kernel_10mm_parcels_100	kernel_10mm_parcels_200	kernel_10mm_parcels_400	kernel_10mm_parcels_1000	kernel_10mm_vertex	kernel_20mm_parcels_100	kernel_20mm_parcels_200	kernel_20mm_parcels_400	kernel_20mm_parcels_1000	kernel_20mm_vertex	kernel_30mm_parcels_100	kernel_30mm_parcels_200	kernel_30mm_parcels_400	kernel_30mm_parcels_1000	kernel_30mm_vertex	kernel_40mm_parcels_100	kernel_40mm_parcels_200	kernel_40mm_parcels_400	kernel_40mm_parcels_1000	kernel_40mm_vertex
PCA_1-001	13.903	13.845	13.8599	13.8157	13.5357	13.9822	13.9034	13.9149	13.8744	13.7199	13.9955	13.9792	13.944	13.9291	13.8327	13.9773	13.9368	13.9487	13.9879	13.8831	13.9755	13.9115	13.9414	13.9631	13.8836	13.9537	13.9058	13.9058	13.9531	13.8953
PCA_1-002	13.9292	13.8652	13.8629	13.7962	13.0659	13.9727	13.9231	13.9069	13.89	13.1173	14.0171	13.9702	13.9616	13.9703	13.554	13.9985	13.9587	13.9538	13.9848	13.877	13.962	13.9516	13.929	13.979	13.8852	13.9491	13.915	13.9153	13.9536	13.8952
PCA_1-003	13.6635	13.3743	13.0924	12.8605	13.0359	13.6669	13.3937	13.1596	12.8979	13.0605	13.6366	13.4145	13.2231	12.9894	13.0723	13.6389	13.5004	13.3743	13.2362	13.3356	13.6794	13.5079	13.4536	13.3089	13.4508	13.652	13.5176	13.4793	13.3802	13.4705
PCA_1-004	13.1523	12.9939	13.0511	12.8585	12.3459	13.2019	13.1114	13.1001	12.9112	12.4097	13.233	13.2132	13.2024	12.9858	12.5422	13.2945	13.284	13.3022	13.1972	13.0467	13.3157	13.3358	13.3041	13.253	13.0968	13.3165	13.3944	13.3077	13.2761	13.1118
PCA_1-005	13.1495	12.98	12.942	12.6021	12.0354	13.1723	13.0557	12.9834	12.6929	12.1945	13.2176	13.1119	13.1046	12.8918	12.4812	13.2603	13.2236	13.2688	13.1738	13.0516	13.2763	13.2398	13.2598	13.2457	13.1023	13.2656	13.2365	13.2704	13.2534	13.1078
PCA_1-006	13.1642	12.8926	12.8099	12.1156	11.9056	13.1553	13.0309	12.9137	12.291	12.1658	13.2387	13.0978	12.9879	12.8237	12.4394	13.2509	13.206	13.2241	13.1392	13.0363	13.239	13.2555	13.2795	13.2094	13.127	13.2383	13.2693	13.2603	13.2408	13.1093
PCA_1-007	13.0499	12.7491	12.4915	12.138	11.7809	13.0804	12.9732	12.5141	12.1639	11.8032	13.1493	13.107	12.96	12.4504	11.8177	13.2299	13.2276	13.2514	13.1287	12.8032	13.2338	13.2343	13.3095	13.2438	13.0248	13.2423	13.2688	13.3048	13.2521	13.1318
PCA_1-008	13.0511	12.637	12.4525	12.1429	11.8264	13.0877	12.7366	12.4837	12.1713	11.801	13.159	12.9588	12.6724	12.3317	11.872	13.2078	13.2045	13.0871	13.0389	12.8117	13.249	13.254	13.1857	13.134	12.9919	13.2255	13.2601	13.2749	13.2209	12.9926
PCA_1-009	13.0148	12.6259	12.4908	12.1546	11.8273	13.0926	12.6868	12.5055	12.1732	11.8312	13.1862	12.8259	12.6428	12.3399	11.8279	13.2792	13.1184	12.9342	12.8589	12.4826	13.2601	13.2635	13.1672	13.0818	12.9247	13.2587	13.2486	13.2628	13.2266	13.0021
PCA_1-010	12.9855	12.505	12.2888	12.1613	11.8312	12.9775	12.5407	12.343	12.1572	11.7791	13.0551	12.5485	12.4154	12.2511	11.8669	13.1236	12.8848	12.6799	12.5763	12.3571	13.2878	13.1937	12.8322	12.8344	12.6573	13.2269	13.2296	13.0096	13.0102	12.996
PCA_1-011	12.8438	12.4941	12.254	12.1608	11.8131	12.9954	12.5516	12.3665	12.1386	11.7819	13.0483	12.5799	12.4001	12.2093	11.8959	12.9075	12.7983	12.6263	12.5395	12.3404	12.9731	13.1562	12.8235	12.8037	12.6256	13.2113	13.2299	12.9252	12.9551	12.7529
PCA_1-012	12.8471	12.5261	12.2945	12.1756	11.8133	12.8955	12.552	12.343	12.1527	11.7936	12.9583	12.6276	12.3797	12.2283	11.8466	12.9161	12.7224	12.6413	12.5229	12.3689	12.9566	12.8377	12.826	12.7869	12.6483	12.956	12.9441	12.9137	12.926	12.7917
PCA_1-013	12.8709	12.4975	12.2946	12.1385	11.7214	12.9673	12.539	12.3229	12.1512	11.6984	12.9299	12.6092	12.3814	12.2402	11.7858	12.9483	12.7444	12.6055	12.5219	12.3474	12.9469	12.8615	12.7739	12.7422	12.6377	12.9525	12.9334	12.9286	12.8944	12.7641
PCA_1-014	12.84	12.4235	12.2576	12.0032	11.722	12.9463	12.4443	12.3151	12.1807	11.6697	12.9487	12.5199	12.3892	12.2635	11.7918	12.9739	12.6519	12.5366	12.5231	12.364	12.9042	12.7595	12.6955	12.6589	12.6623	12.9217	12.9315	12.7801	12.6954	12.7797
PCA_1-015	12.8704	12.4125	12.2727	12.0606	11.7204	12.9192	12.4936	12.312	12.0695	11.7188	13.0122	12.5064	12.4368	12.2475	11.7503	12.9871	12.6742	12.5773	12.4819	12.3938	12.9604	12.8016	12.7288	12.6484	12.6009	12.9066	12.8774	12.8033	12.7363	12.7317
PCA_1-016	12.8008	12.4475	12.1239	11.9091	11.6288	12.8107	12.488	12.2517	11.943	11.6585	12.8231	12.5914	12.4629	12.2186	11.7616	12.8644	12.6764	12.567	12.4772	12.3227	12.9748	12.7384	12.7647	12.6728	12.6318	12.97	12.7959	12.8211	12.7478	12.7066
PCA_1-017	12.7563	12.4604	12.1593	11.9097	11.6587	12.8291	12.487	12.2067	11.9604	11.6303	12.8	12.5353	12.3499	12.1077	11.7611	12.859	12.6392	12.6074	12.4712	12.2745	12.8885	12.7489	12.7567	12.6894	12.626	12.9016	12.806	12.7995	12.7912	12.7167
PCA_1-018	12.7617	12.4692	12.119	11.9106	11.6538	12.8111	12.4678	12.1701	11.9424	11.6374	12.8563	12.5489	12.364	12.1113	11.7729	12.899	12.6453	12.627	12.4623	12.2925	12.9049	12.7934	12.7154	12.7006	12.635	12.9102	12.8767	12.7589	12.7522	12.7167
PCA_1-019	12.7825	12.4248	12.175	11.8959	11.6405	12.8413	12.5626	12.2667	11.9516	11.6511	12.8706	12.5467	12.3492	12.1399	11.7876	12.8521	12.6677	12.5806	12.4971	12.1838	12.8851	12.823	12.7424	12.704	12.606	12.9081	12.7655	12.7549	12.7949	12.6543
PCA_1-020	12.7798	12.4147	12.0886	11.8844	11.5856	12.8133	12.4579	12.0984	11.968	11.6807	12.8388	12.4912	12.2679	12.1851	11.7253	12.8295	12.7057	12.61	12.478	12.1689	12.8517	12.8035	12.764	12.7247	12.6324	12.8806	12.8161	12.7676	12.7361	12.6685
PCA_1-021	12.7224	12.4615	12.0931	11.9277	11.6035	12.8085	12.45	12.1376	11.9302	11.6601	12.8242	12.5837	12.3086	12.0752	11.7941	12.8778	12.6366	12.6261	12.5238	12.1291	12.8591	12.7129	12.7251	12.7208	12.6235	12.893	12.8476	12.8077	12.7064	12.6138
PCA_1-022	12.7614	12.3789	12.1302	11.8729	11.6756	12.7701	12.4184	12.1812	11.9085	11.6149	12.8649	12.5198	12.2268	12.0055	11.754	12.86	12.6855	12.5395	12.5548	12.1542	12.8895	12.7132	12.7291	12.728	12.5265	12.9231	12.7875	12.8123	12.7201	12.5832
PCA_1-023	12.7046	12.3739	12.112	11.9625	11.646	12.744	12.4824	12.198	11.9618	11.6577	12.8372	12.4612	12.2756	12.0283	11.7571	12.8825	12.646	12.5596	12.5462	12.1797	12.8616	12.7253	12.7147	12.6997	12.5223	12.8741	12.8174	12.7922	12.8018	12.6246
PCA_1-024	12.6856	12.3469	12.1397	11.8922	11.6667	12.6924	12.468	12.1886	11.8928	11.7125	12.8788	12.4947	12.2894	12.0217	11.7696	12.8519	12.6454	12.5006	12.3824	12.154	12.8336	12.7531	12.7759	12.6775	12.4675	12.8457	12.7959	12.8044	12.7851	12.6819
PCA_1-025	12.6672	12.3694	12.145	11.8759	11.6329	12.7194	12.3938	12.2377	11.8768	11.678	12.7306	12.4071	12.3364	12.0148	11.7717	12.8211	12.6581	12.4949	12.4029	12.1429	12.8594	12.8199	12.7065	12.6365	12.4944	12.8917	12.8337	12.8091	12.7734	12.7214
PCA_1-026	12.693	12.3483	12.048	11.9212	11.641	12.7031	12.4052	12.175	11.8724	11.6827	12.7408	12.4243	12.3415	12.0003	11.8456	12.8668	12.6685	12.5547	12.4178	12.1319	12.8584	12.767	12.6536	12.6281	12.4039	12.8896	12.9081	12.7485	12.756	12.6525
PCA_1-027	12.6263	12.3549	12.1494	11.9082	11.7086	12.6873	12.4073	12.1974	11.8777	11.7192	12.7041	12.4799	12.3243	12.0523	11.7997	12.8508	12.6262	12.5034	12.4163	12.1102	12.8108	12.7964	12.7244	12.6199	12.3811	12.8879	12.8149	12.7914	12.7471	12.6852
PCA_1-028	12.6374	12.3255	12.114	11.8816	11.6538	12.6606	12.3958	12.182	11.8957	11.6798	12.8331	12.4373	12.3096	12.0401	11.7893	12.8498	12.5953	12.5273	12.4009	12.1549	12.853	12.8092	12.7352	12.6164	12.3853	12.7998	12.8669	12.7916	12.8161	12.6926
PCA_1-029	12.6344	12.3295	12.0898	11.8992	11.6274	12.6621	12.3911	12.1641	11.8997	11.698	12.661	12.4601	12.326	11.954	11.7983	12.8377	12.6282	12.5208	12.3411	12.1745	12.8429	12.7561	12.656	12.6495	12.4604	12.8994	12.8268	12.8173	12.7957	12.6107
PCA_1-030	12.5901	12.2765	12.1309	11.9246	11.7295	12.6454	12.2659	12.1799	11.898	11.7049	12.7197	12.3379	12.3352	12.019	11.8935	12.7583	12.6345	12.536	12.3498	12.1339	12.8054	12.7816	12.7089	12.6756	12.4161	12.8278	12.8314	12.7772	12.7957	12.6647
PCA_1-031	12.6313	12.3365	12.0888	11.9152	11.659	12.667	12.3241	12.1314	11.892	11.751	12.6896	12.4083	12.3223	11.9606	11.7473	12.805	12.5864	12.5233	12.3729	12.1646	12.8473	12.8554	12.7106	12.6523	12.4629	12.8618	12.8577	12.7975	12.735	12.6232
PCA_1-032	12.6359	12.3611	12.054	11.936	11.6495	12.6288	12.3396	12.1531	11.9728	11.6956	12.6851	12.4099	12.2675	12.0192	11.737	12.7448	12.6364	12.5352	12.3422	12.1159	12.9157	12.7954	12.6906	12.6231	12.4812	12.865	12.8515	12.7351	12.7473	12.6583
PCA_1-033	12.6447	12.2782	12.1167	11.9911	11.6698	12.683	12.3151	12.1322	11.8987	11.7334	12.6848	12.4257	12.2817	11.9786	11.7677	12.748	12.5876	12.562	12.386	12.0836	12.7748	12.7935	12.6612	12.5843	12.4445	12.8927	12.8817	12.7476	12.7137	12.6288
PCA_1-034	12.6363	12.3119	12.1077	11.9562	11.7604	12.6409	12.3045	12.2278	11.9291	11.6827	12.6935	12.3728	12.2547	11.9825	11.7673	12.73	12.6696	12.5139	12.3609	12.0529	12.7992	12.8513	12.6746	12.6284	12.3882	12.9152	12.8536	12.7364	12.7279	12.5921
PCA_1-035	12.6741	12.3548	12.0854	11.9865	11.7082	12.5863	12.3472	12.0903	12.0107	11.7049	12.6816	12.4009	12.1975	12.0225	11.7292	12.8201	12.6249	12.5241	12.3394	12.0788	12.809	12.8451	12.6897	12.5854	12.4281	12.7936	12.8613	12.7738	12.7854	12.5072
PCA_1-036	12.6931	12.3548	12.1314	11.9239	11.664	12.6712	12.3193	12.1239	11.9045	11.7334	12.6831	12.4271	12.1975	11.9838	11.765	12.8089	12.6144	12.4563	12.4048	12.0603	12.9012	12.7603	12.7789	12.6674	12.3551	12.7339	12.8279	12.8406	12.7656	12.4654
PCA_1-037	12.5886	12.2752	12.1381	11.8767	11.6617	12.6366	12.3078	12.0938	11.9674	11.6713	12.7247	12.3476	12.1098	12.0548	11.793	12.7655	12.6157	12.4691	12.3904	12.0959	12.8168	12.7405	12.7311	12.6139	12.3587	12.8002	12.8452	12.8102	12.7623	12.5195
PCA_1-038	12.6205	12.2974	12.159	11.9583	11.7676	12.694	12.3337	12.0977	12.0035	11.7302	12.739	12.3372	12.1704	12.0401	11.7634	12.8771	12.4694	12.3651	12.3646	12.1568	12.8104	12.7283	12.6981	12.6475	12.3981	12.7803	12.8153	12.8682	12.7664	12.5103
PCA_1-039	12.5813	12.3124	12.081	12.016	11.7391	12.6891	12.4104	12.1209	11.8877	11.7071	12.7263	12.3888	12.1924	12.0012	11.7358	12.8183	12.5435	12.4577	12.3197	12.0748	12.8506	12.7827	12.7306	12.6697	12.3935	12.8301	12.8693	12.8056	12.8111	12.4577
PCA_1-040	12.678	12.3719	12.1605	11.9919	11.7442	12.6819	12.346	12.1365	11.9579	11.6724	12.7193	12.3872	12.2081	12.0204	11.7266	12.8368	12.5068	12.4534	12.3271	12.1293	12.7826	12.6857	12.597	12.597	12.4169	12.7983	12.7813	12.7438	12.7057	12.3742
PCA_1-041	12.6592	12.3402	12.1191	11.9515	11.7121	12.668	12.4345	12.1462	12.0193	11.7546	12.7112	12.3621	12.1853	12.0055	11.8428	12.7684	12.4792	12.3746	12.3389	12.1381	12.8573	12.6892	12.6932	12.6181	12.4412	12.8623	12.8226	12.8272	12.824	12.4482
PCA_1-042	12.6711	12.3981	12.1664	11.9924	11.7523	12.6815	12.4021	12.1394	11.9487	11.6756	12.751	12.3537	12.1671	12.0346	11.7965	12.7666	12.449	12.4784	12.4184	12.1046	12.8422	12.7318	12.6378	12.6669	12.3882	12.8319	12.813	12.7499	12.7916	12.4498
PCA_1-043	12.6571	12.4586	12.1484	12.0418	11.7674	12.6677	12.4114	12.1279	11.958	11.7	12.7576	12.393	12.2116	12.055	11.861	12.8003	12.4567	12.4117	12.2875	12.1079	12.7617	12.6637	12.6691	12.5573	12.3961	12.756	12.897	12.7812	12.7448	12.4777
PCA_1-044	12.6181	12.3914	12.1621	12.0687	11.8143	12.7042	12.351	12.1918	12.0008	11.6575	12.7769	12.401	12.2299	12.0314	11.8229	12.8394	12.4085	12.358	12.3018	12.1112	12.8054	12.6615	12.6621	12.5844	12.3733	12.8866	12.8113	12.7858	12.7314	12.4777
PCA_1-045	12.6889	12.4864	12.207	12.0531	11.7923	12.675	12.4157	12.1995	11.9561	11.7257	12.7799	12.3451	12.1826	12.0375	11.7793	12.8078	12.501	12.3618	12.2921	12.074	12.7285	12.6531	12.6259	12.494	12.3544	12.7764	12.7082	12.6683	12.6196	12.4382
PCA_1-046	12.6328	12.3549	12.2231	11.9943	11.7365	12.7489	12.2802	12.1943	11.9594	11.693	12.7781	12.3949	12.1973	12.0485	11.8051	12.7945	12.5844	12.4485	12.2678	12.0347	12.8311	12.6404	12.547	12.4997	12.4606	12.7322	12.7448	12.7503	12.6716	12.4387
PCA_1-047	12.6543	12.2775	12.2204	12.0556	11.8399	12.7495	12.3995	12.1216	12.0228	11.698	12.7582	12.4486	12.2074	12.0254	11.7763	12.8418	12.4789	12.3792	12.2058	12.1329	12.744	12.5695	12.5161	12.6224	12.4238	12.7429	12.6818	12.6425	12.6712	12.4487
PCA_1-048	12.6474	12.3685	12.194	11.9885	11.9011	12.79	12.3283	12.2066	11.9988	11.6766	12.6969	12.3303	12.1696	12.0912	11.7897	12.6887	12.5097	12.4028	12.2417	12.0081	12.7724	12.5896	12.5131	12.6015	12.3587	12.7324	12.7008	12.6822	12.6678	12.4002
PCA_1-049	12.7193	12.3526	12.1838	11.9903	11.8176	12.7123	12.4097	12.175	12.0599	11.7314	12.7804	12.3057	12.1748	12.0328	11.7448	12.6296	12.5362	12.3696	12.2775	12.0404	12.7991	12.6733	12.5764	12.5409	12.3822	12.7012	12.7783	12.6818	12.687	12.4341
PCA_1-050	12.6999	12.3673	12.2311	11.9685	11.8317	12.7861	12.3793	12.2301	11.9789	11.8065	12.6787	12.349	12.1873	12.0043	11.8043	12.6647	12.3343	12.4301	12.2562	12.0122	12.8103	12.6084	12.5074	12.6164	12.381	12.6729	12.7259	12.6805	12.692	12.403
PCA_1-051	12.7221	12.3516	12.182	12.0079	11.8182	12.7113	12.3513	12.29	12.0212	11.8201	12.6831	12.3199	12.1939	11.9886	11.8228	12.6916	12.4039	12.3878	12.375	12.0188	12.7287	12.6764	12.5882	12.6292	12.3356	12.7537	12.5968	12.6936	12.66	12.4784
PCA_1-052	12.711	12.3836	12.3037	11.9989	11.7989	12.7305	12.3715	12.2356	11.9577	11.7684	12.7085	12.3832	12.1901	12.043	11.8612	12.6985	12.5385	12.4442	12.2544	12.0141	12.6494	12.6597	12.5482	12.5942	12.3436	12.7511	12.7339	12.6984	12.6603	12.4226
PCA_1-053	12.6498	12.4434	12.2408	11.9423	11.8432	12.6678	12.4054	12.2289	11.9451	11.7636	12.7254	12.3764	12.2319	12.017	11.779	12.6343	12.3705	12.3965	12.3078	12.0671	12.7815	12.6071	12.5648	12.5918	12.4324	12.6921	12.6836	12.643	12.7302	12.4205
PCA_1-054	12.673	12.3421	12.2055	11.9917	11.8138	12.7088	12.4508	12.2454	12.0069	11.7643	12.7088	12.4101	12.2038	12.0018	11.8334	12.6589	12.4196	12.3946	12.3342	12.0314	12.6993	12.6366	12.5707	12.5873	12.2962	12.6605	12.6805	12.6502	12.7617	12.3313
PCA_1-055	12.6612	12.4395	12.1585	12.0577	11.909	12.6633	12.3419	12.2254	12.0416	11.7542	12.6663	12.4121	12.2213	12.0701	11.7903	12.7178	12.4554	12.3709	12.2691	12.0829	12.6062	12.631	12.5722	12.5626	12.3442	12.6499	12.6986	12.7384	12.6522	12.4143
PCA_1-056	12.6498	12.4179	12.1904	12.0861	11.8704	12.7491	12.4891	12.2204	11.9303	11.8114	12.7805	12.361	12.2503	11.9557	11.883	12.6267	12.4774	12.4323	12.3287	12.0471	12.651	12.6914	12.5689	12.6651	12.298	12.674	12.6913	12.7272	12.6798	12.4036
PCA_1-057	12.6758	12.3617	12.2317	12.0758	11.8766	12.7597	12.355	12.2268	12.0385	11.7591	12.7385	12.3875	12.1625	12.0334	11.7969	12.6478	12.5035	12.2889	12.2561	12.0769	12.6818	12.614	12.5336	12.6741	12.2969	12.6253	12.6679	12.7124	12.6727	12.3767
PCA_1-058	12.6825	12.2851	12.1918	12.032	11.8603	12.6697	12.3647	12.2887	12.0054	11.8075	12.7964	12.3971	12.2154	12.0638	11.8145	12.6905	12.4446	12.4481	12.3003	11.9981	12.6208	12.6396	12.6082	12.5606	12.4048	12.7504	12.6663	12.676	12.7523	12.5032
PCA_1-059	12.6937	12.2543	12.2112	12.0118	11.8539	12.7068	12.3842	12.2005	11.9914	11.805	12.7267	12.3456	12.2481	12.1028	11.8637	12.6817	12.4869	12.3837	12.316	11.9936	12.7446	12.6617	12.5659	12.6677	12.4242	12.7095	12.7083	12.686	12.6947	12.3747
PCA_1-060	12.6731	12.3669	12.2671	12.0184	11.8296	12.6501	12.3941	12.1942	11.9999	11.8313	12.7817	12.3526	12.2647	12.0751	11.8539	12.6768	12.5015	12.3072	12.3185	12.0157	12.6806	12.6465	12.5506	12.5645	12.3822	12.6767	12.6948	12.6368	12.6684	12.4425
PCA_1-061	12.6939	12.3566	12.1862	12.0482	11.7811	12.6759	12.3619	12.2494	12.0398	11.7678	12.6297	12.3131	12.1901	12.0887	11.8644	12.6045	12.376	12.3969	12.2582	12.0067	12.7392	12.5786	12.6269	12.6531	12.2753	12.6571	12.7023	12.7212	12.7707	12.4409
PCA_1-062	12.6492	12.4409	12.2121	12.1558	11.7952	12.7025	12.3694	12.2758	12.0547	11.7713	12.6019	12.3497	12.2331	12.2238	11.9363	12.6385	12.4379	12.4387	12.3447	11.9549	12.6772	12.6641	12.6402	12.6812	12.2965	12.7293	12.6573	12.6807	12.7285	12.3847
PCA_1-063	12.664	12.4211	12.2111	12.0235	11.8768	12.7007	12.392	12.2635	12.1574	11.8154	12.6471	12.3794	12.333	11.9836	11.8967	12.6371	12.504	12.3135	12.3024	12.0047	12.6538	12.5831	12.6082	12.5485	12.3546	12.6499	12.6931	12.7409	12.7625	12.4285
PCA_1-064	12.5324	12.3869	12.342	12.0625	11.7357	12.6325	12.4371	12.2565	12.0517	11.7725	12.6172	12.4361	12.33	12.088	11.844	12.675	12.4847	12.4178	12.4291	12.0738	12.7307	12.6296	12.5794	12.6089	12.3445	12.6999	12.72	12.7717	12.7019	12.3982
PCA_1-065	12.5897	12.3549	12.2683	12.1051	11.8896	12.6441	12.3576	12.3667	12.0952	11.7014	12.7128	12.4108	12.3291	12.0915	11.934	12.545	12.4955	12.3946	12.3748	12.0907	12.8009	12.614	12.6968	12.5662	12.3285	12.73	12.7661	12.7983	12.6832	12.3875
PCA_1-066	12.5727	12.3839	12.3803	12.1134	11.8758	12.6885	12.5123	12.2317	12.0271	11.8452	12.6753	12.4395	12.3287	12.0677	11.9101	12.6605	12.4462	12.3622	12.293	12.0218	12.685	12.6439	12.6361	12.6017	12.4223	12.7172	12.7181	12.7988	12.6743	12.4692
PCA_1-067	12.6682	12.4617	12.249	12.1115	11.7978	12.6739	12.3859	12.2385	12.1161	11.8347	12.6663	12.395	12.2634	12.1243	11.9211	12.686	12.5098	12.478	12.2878	12.0746	12.7209	12.637	12.6371	12.5213	12.3401	12.7069	12.5986	12.6948	12.7338	12.4327
PCA_1-068	12.5601	12.3665	12.2972	12.0815	11.9324	12.647	12.4073	12.282	12.0971	11.904	12.607	12.3921	12.2912	12.1513	11.9479	12.8334	12.4694	12.4808	12.349	12.1534	12.7299	12.6595	12.5755	12.4807	12.2919	12.7331	12.7755	12.6131	12.7015	12.4519
PCA_1-069	12.6422	12.4483	12.3376	12.0769	11.8826	12.7309	12.5073	12.3092	12.162	11.8302	12.653	12.3654	12.269	12.1383	11.9186	12.7154	12.494	12.4273	12.4326	12.0905	12.7544	12.6044	12.6461	12.5111	12.331	12.7138	12.7597	12.7029	12.7224	12.4635
PCA_1-070	12.6028	12.5004	12.2571	12.0978	11.9033	12.6676	12.417	12.2743	12.0861	11.8103	12.6556	12.408	12.3012	12.2002	11.8793	12.6489	12.4257	12.4171	12.3807	12.0516	12.7069	12.647	12.5863	12.5841	12.2951	12.788	12.7107	12.7951	12.6538	12.3874
PCA_1-071	12.7027	12.4459	12.3273	12.2261	11.9142	12.6642	12.3713	12.3499	12.1534	11.792	12.6384	12.3811	12.3235	12.2382	11.9472	12.7234	12.4589	12.447	12.3684	12.0924	12.7208	12.6579	12.5411	12.5162	12.3165	12.6965	12.7647	12.7285	12.7147	12.4297
PCA_1-072	12.6447	12.4736	12.3107	12.1112	11.9009	12.7224	12.4469	12.3706	12.0474	11.847	12.6659	12.3533	12.341	12.1679	11.9103	12.6592	12.5004	12.4173	12.3223	12.0732	12.7	12.5752	12.6121	12.4947	12.3169	12.8311	12.8435	12.7271	12.6387	12.4946
PCA_1-073	12.6176	12.4811	12.2822	12.1322	11.8872	12.6017	12.4176	12.3178	12.0996	11.8904	12.6084	12.464	12.3571	12.133	11.9501	12.6426	12.5093	12.5694	12.3408	12.0327	12.7046	12.6154	12.6929	12.5124	12.3761	12.6489	12.874	12.7281	12.7884	12.4067
PCA_1-074	12.5715	12.4579	12.3153	12.2626	11.9621	12.6427	12.5185	12.3197	12.0748	11.8718	12.6795	12.3734	12.3692	12.1443	11.964	12.66	12.4441	12.4173	12.3574	12.0844	12.7073	12.5121	12.5963	12.5244	12.335	12.7143	12.723	12.6164	12.7047	12.5394
PCA_1-075	12.6409	12.4393	12.2601	12.1147	11.8366	12.6749	12.4513	12.3265	12.1155	11.8357	12.684	12.4109	12.3363	12.0992	11.8922	12.6908	12.4726	12.5379	12.3319	12.1686	12.6821	12.6137	12.6059	12.5822	12.4126	12.7969	12.7096	12.7533	12.6248	12.533
PCA_1-076	12.6482	12.525	12.2818	12.1406	11.9081	12.649	12.5101	12.3629	12.1693	11.8748	12.6298	12.487	12.4576	12.1623	11.9118	12.7357	12.4846	12.4536	12.4453	12.1853	12.6818	12.5892	12.6195	12.5319	12.2955	12.7412	12.6526	12.7532	12.7154	12.3964
PCA_1-077	12.686	12.4987	12.3292	12.2509	12.0229	12.6517	12.384	12.2718	12.2429	11.9004	12.7206	12.3905	12.3851	12.2104	11.8797	12.6321	12.4947	12.4324	12.3923	12.0534	12.6918	12.6674	12.6173	12.6567	12.3628	12.738	12.6633	12.6678	12.8163	12.4754
PCA_1-078	12.6118	12.5454	12.2767	12.2064	11.9191	12.711	12.485	12.2331	12.1965	11.937	12.7027	12.5396	12.3417	12.1463	11.9337	12.7412	12.4823	12.4917	12.4252	12.1579	12.7712	12.6251	12.6022	12.5032	12.3014	12.8006	12.7338	12.7159	12.6932	12.4067
PCA_1-079	12.7225	12.5002	12.3166	12.1572	11.9625	12.6906	12.4807	12.3454	12.2466	11.8495	12.7489	12.395	12.4612	12.2675	11.9407	12.708	12.4281	12.5227	12.4019	12.0706	12.7162	12.5978	12.669	12.5193	12.3929	12.7473	12.6587	12.6934	12.6629	12.472
PCA_1-080	12.6547	12.6388	12.3141	12.1832	11.9722	12.6987	12.5555	12.3524	12.2141	11.8941	12.734	12.4229	12.3069	12.2026	11.975	12.6897	12.5334	12.49	12.5027	12.177	12.78	12.6062	12.6325	12.5638	12.4177	12.7851	12.7357	12.7401	12.7818	12.452
PCA_1-081	12.6883	12.4871	12.3732	12.2812	11.9603	12.7039	12.5941	12.2406	12.1304	12.0385	12.7421	12.4534	12.4074	12.2644	12.0165	12.7401	12.5777	12.5817	12.4188	12.1175	12.6904	12.6082	12.5641	12.5202	12.3849	12.694	12.6563	12.7242	12.685	12.4696
PCA_1-082	12.6433	12.5457	12.283	12.212	12.0268	12.717	12.5369	12.3818	12.134	11.9059	12.7883	12.5353	12.4007	12.1152	11.9602	12.6673	12.5086	12.5552	12.4765	12.1929	12.6924	12.702	12.6339	12.6153	12.3431	12.6983	12.6177	12.6922	12.6943	12.459
PCA_1-083	12.7361	12.5632	12.2935	12.3023	11.9532	12.6746	12.5634	12.4068	12.2446	11.9685	12.7693	12.4789	12.3953	12.2204	11.9264	12.8056	12.5173	12.4574	12.4131	12.1273	12.6886	12.6103	12.6275	12.6871	12.3232	12.8274	12.73	12.7566	12.6261	12.4068
PCA_1-084	12.6422	12.6007	12.3494	12.1486	12.0603	12.7509	12.4952	12.3356	12.3552	11.9547	12.7886	12.4844	12.3964	12.4156	11.9324	12.7992	12.6173	12.4727	12.3222	12.1746	12.7625	12.6518	12.6629	12.6078	12.4605	12.727	12.6747	12.8026	12.7096	12.3791
PCA_1-085	12.7783	12.5784	12.3777	12.2273	12.0765	12.7145	12.5382	12.3663	12.2727	11.9837	12.7529	12.5426	12.3877	12.2332	11.9373	12.7488	12.4687	12.5205	12.399	12.1669	12.7578	12.6006	12.733	12.5897	12.3139	12.7194	12.691	12.7256	12.7117	12.3569
PCA_1-086	12.7127	12.5696	12.4351	12.1639	11.9936	12.7237	12.4959	12.3621	12.2475	12.0731	12.8337	12.5615	12.4098	12.2337	12.0523	12.7193	12.5196	12.4927	12.4615	12.2179	12.6913	12.6107	12.6234	12.6981	12.4389	12.7573	12.7487	12.7809	12.7223	12.4391
PCA_1-087	12.672	12.6228	12.3311	12.2823	12.2033	12.7438	12.5123	12.4509	12.3378	12.0468	12.6857	12.5145	12.4183	12.3361	12.0512	12.693	12.5814	12.562	12.402	12.1782	12.7774	12.6236	12.683	12.5369	12.4173	12.8583	12.6925	12.7705	12.6903	12.5123
PCA_1-088	12.688	12.5452	12.3512	12.3154	12.0313	12.758	12.664	12.4007	12.2287	12.0262	12.7479	12.574	12.3817	12.2827	12.0428	12.8203	12.4939	12.5674	12.4487	12.1633	12.8246	12.5895	12.625	12.5786	12.3561	12.7913	12.7019	12.7834	12.7833	12.4397
PCA_1-089	12.769	12.5535	12.4564	12.2987	12.0026	12.8228	12.6632	12.365	12.2142	12.064	12.6995	12.5042	12.482	12.2631	12.0269	12.7116	12.5715	12.5764	12.4745	12.2323	12.7171	12.6775	12.7147	12.5877	12.2969	12.7582	12.7101	12.7356	12.7316	12.4293
PCA_1-090	12.7997	12.6313	12.3557	12.3022	12.1036	12.8344	12.5766	12.4136	12.2888	11.9779	12.7979	12.529	12.4541	12.3217	12.0463	12.7573	12.5314	12.6241	12.4405	12.2331	12.7672	12.7084	12.6883	12.6304	12.3929	12.7707	12.7681	12.7294	12.7701	12.4686
PCA_1-091	12.7867	12.5885	12.3855	12.2548	12.017	12.9212	12.5308	12.4278	12.2671	12.0687	12.8221	12.5674	12.4668	12.2614	12.0967	12.6902	12.5139	12.6341	12.454	12.2477	12.6827	12.7235	12.6488	12.6789	12.3785	12.855	12.7368	12.6967	12.8745	12.4413
PCA_1-092	12.802	12.5427	12.4437	12.3325	12.088	12.8864	12.5662	12.4702	12.2603	11.9946	12.7791	12.5014	12.4533	12.3066	12.0233	12.6777	12.5805	12.5294	12.5252	12.1999	12.7297	12.6735	12.6775	12.6061	12.4412	12.8779	12.7643	12.681	12.8183	12.4073
PCA_1-093	12.8263	12.6309	12.4217	12.2741	12.1318	12.7628	12.5526	12.396	12.181	12.0751	12.7406	12.5029	12.5206	12.2851	12.036	12.8531	12.6743	12.6386	12.5445	12.088	12.7708	12.6623	12.6446	12.6458	12.3495	12.7971	12.9765	12.8261	12.7308	12.5164
PCA_1-094	12.7855	12.518	12.4981	12.2285	12.1904	12.8521	12.532	12.3945	12.3217	12.0411	12.7449	12.4822	12.4766	12.3298	12.157	12.7819	12.6284	12.656	12.5326	12.2664	12.8503	12.6304	12.5625	12.7011	12.4587	12.8333	12.8501	12.6487	12.6191	12.489
PCA_1-095	12.873	12.6074	12.4669	12.2819	12.1445	12.8021	12.4868	12.4478	12.3545	12.0039	12.7405	12.55	12.471	12.4314	12.069	12.8255	12.5415	12.6389	12.4377	12.3006	12.7167	12.6569	12.5989	12.7164	12.4156	12.8402	12.8271	12.713	12.7972	12.5201
PCA_1-096	12.8051	12.6017	12.4875	12.2869	12.1661	12.8392	12.6077	12.3547	12.3134	12.049	12.8496	12.57	12.5488	12.3127	12.0414	12.757	12.6626	12.6269	12.6071	12.2697	12.8195	12.6175	12.6172	12.5862	12.4553	12.838	12.747	12.7237	12.6636	12.4865
PCA_1-097	12.8379	12.643	12.4301	12.3079	12.0645	12.8587	12.565	12.4503	12.3637	12.0568	12.8252	12.5239	12.5026	12.3185	12.1058	12.673	12.7671	12.5574	12.565	12.3688	12.6717	12.6534	12.6908	12.6558	12.4084	12.7749	12.7932	12.8168	12.7596	12.5444
PCA_1-098	12.795	12.5742	12.4764	12.3444	12.2709	12.8143	12.588	12.5716	12.2398	12.1063	12.7946	12.6108	12.3938	12.3458	12.0859	12.746	12.6024	12.5657	12.5955	12.2718	12.7672	12.7126	12.7458	12.5922	12.4224	12.831	12.9488	12.7079	12.773	12.3917
PCA_1-099	12.8273	12.5392	12.5177	12.273	12.0891	12.7133	12.6718	12.4768	12.3782	12.0896	12.8667	12.5977	12.5143	12.3429	12.1526	12.7649	12.6841	12.6579	12.4923	12.1991	12.7871	12.641	12.698	12.5842	12.3559	12.7046	12.7338	12.7347	12.6737	12.3771
PCA_1-100	12.8254	12.5772	12.4274	12.4026	12.1637	12.842	12.6083	12.4067	12.3473	12.0304	12.9417	12.6419	12.4431	12.3399	12.1442	12.7509	12.5539	12.5445	12.571	12.21	12.7325	12.6986	12.7269	12.6515	12.3858	12.7429	12.8579	12.7781	12.7348	12.3744
