# Supplementary material for: Association vs. Prediction: The Impact of Cortical Surface Smoothing and Parcellation on Brain Age
Source: Front Big Data. 2021 May 4;4:637724. doi: 10.3389/fdata.2021.637724 (PMC8131952; doi:10.3389/fdata.2021.637724)
Supplement: Supplementary file 7 [file Table_5.XLSX]

## Sheet: kernel_0mm_parcels_100
PCA_1	PCA_2	PCA_3	PCA_4	PCA_5	PCA_6	PCA_7	PCA_8	PCA_9	PCA_10	PCA_11	PCA_12	PCA_13	PCA_14	PCA_15	PCA_16	PCA_17	PCA_18	PCA_19	PCA_20	PCA_21	PCA_22	PCA_23	PCA_24	PCA_25	PCA_26	PCA_27	PCA_28	PCA_29	PCA_30	PCA_31	PCA_32	PCA_33	PCA_34	PCA_35	PCA_36	PCA_37	PCA_38	PCA_39	PCA_40	PCA_41	PCA_42	PCA_43	PCA_44	PCA_45	PCA_46	PCA_47	PCA_48	PCA_49	PCA_50
7.6419	1.07018	-1.62468	-0.0141065	-0.196958	-0.242412	-0.914281	0.0910547	0.19062	0.41436	0.337368	-0.189127	0.311528	1.03068	1.54957	0.14179	0.22271	0.590928	-0.632046	-1.2103	-0.464191	0.892894	-0.299927	0.230006	-0.61181	-0.253758	-0.732967	0.474249	0.366844	0.0420996	-0.17996	0.25273	-0.130344	-0.900127	-0.141095	-0.425001	0.115672	-0.60907	1.40721	0.349581	-0.139427	-0.347496	-0.728492	0.193234	-1.18422	0.768294	0.480045	0.812322	0.125321	-0.307354
3.01744	0.177986	-2.98016	-0.216589	-0.186857	1.17821	-0.333518	0.519745	-0.891859	0.847165	0.0634375	-1.70211	0.96894	0.29843	-1.13686	-0.631891	-0.473848	-0.436945	1.40469	-0.696442	-0.142425	0.52979	-0.728068	0.622294	0.496409	0.531066	0.585362	-0.791762	0.80716	-0.791748	0.125091	-0.513926	-0.0689052	-0.0483652	0.619949	-0.262466	-0.62499	-0.138775	0.309504	-0.0356852	0.160243	-0.852288	-0.586828	0.323441	-0.314565	0.613369	0.0469027	0.0461347	0.622245	0.0618624
12.6493	1.05359	-0.325458	0.614652	-1.05639	-1.25004	0.974952	-1.04534	0.772954	-0.548533	1.69888	0.43929	0.957744	-0.404245	0.344081	-0.524268	-0.163513	0.715822	-0.56138	-0.463741	0.1851	-0.141377	-0.431918	1.00234	0.484263	0.685287	0.261311	-0.638698	-0.345025	-1.04483	1.39133	-0.599278	-0.833582	-0.128847	-0.248769	0.379185	-0.021647	0.0572053	0.539824	0.24674	1.16628	-0.277981	0.323729	-0.388828	0.104379	-0.0116537	-0.266118	-0.0451947	-0.369488	0.933447
7.2285	-1.32603	2.37126	1.14036	0.490266	0.755296	0.421326	-0.33189	0.709825	0.809458	0.00537001	0.777971	-0.329794	0.823001	-0.0485629	-0.0793822	0.876548	1.06883	0.416758	-1.71988	-0.46567	-1.23767	-0.216387	0.181824	0.340835	0.372924	-0.0161144	0.50997	0.420176	-0.334664	0.583332	0.343473	0.836086	0.064275	-0.798324	-0.0444671	0.672208	0.490421	-0.615536	1.2001	0.252065	-0.134317	-0.205912	-0.635578	0.245959	0.223296	-0.475011	-0.730692	0.892535	0.756371
-1.0498	0.304329	-1.64892	0.780491	-1.52198	0.373536	0.292243	-0.174673	0.272359	0.0325731	0.077526	0.189655	-0.121273	0.203816	-0.0190935	-0.576199	-0.174621	-0.416445	0.168112	1.1299	-0.733368	-0.633206	-1.11399	-0.200894	0.132571	-0.374299	0.386779	-0.398412	-0.799404	-0.77472	0.446332	-0.134788	0.298497	-0.688057	0.0239193	-0.383774	-0.727755	-0.405256	0.930968	-0.680072	-0.0363955	0.568705	0.793175	0.397826	-0.369501	-0.168138	-0.368745	-0.292966	0.18907	-0.335166
7.95676	2.47647	-2.01137	-0.11755	1.24072	-1.06187	0.509815	-0.483493	0.633683	0.236609	1.55673	-1.47206	0.0384955	1.11442	-0.577728	-0.316004	0.595072	-0.877896	-0.261837	-0.0837594	-0.371663	-0.301276	-0.302149	-1.21196	0.678698	-0.305551	-0.238614	0.383709	0.758789	-0.586212	0.558781	-0.754747	0.0390473	-0.359761	0.568629	0.0978035	0.312672	0.243258	0.401946	0.377806	0.0940082	0.0581121	1.05164	-1.0007	0.391167	0.147888	0.117981	-0.146197	0.156348	-0.27709
7.52967	0.134727	-0.340578	-0.151901	-0.686478	-0.68367	-0.67808	-0.3649	0.761422	0.23908	-0.276566	-0.723083	0.208141	0.677844	1.57279	0.767626	-0.767824	0.330959	0.17917	-0.968809	0.136697	0.757023	1.56751	0.141314	-1.10081	0.775922	-0.391216	0.176294	0.284744	-0.0218585	-0.668349	-0.584784	-0.320095	0.619962	0.297577	-0.525073	-0.304197	-0.772635	-0.461139	0.29283	0.193652	0.12203	0.538721	-0.139136	-0.107322	-0.910478	-0.691626	-0.153217	0.244629	0.0841675
11.3497	0.483875	-1.09838	0.923701	2.1052	0.0966363	-0.600069	0.397469	0.121925	-0.841698	-0.664917	0.204162	-0.406415	0.615026	-0.395268	-0.257355	-0.0590894	-0.211151	0.225714	-0.166208	-1.39541	-0.924869	-0.191653	-0.222973	-0.351071	-1.29975	0.479099	0.356329	-1.16722	-1.23353	0.381129	0.780713	0.74646	-0.0829753	-0.822487	2.28471	-0.110103	0.900136	0.249052	-0.324901	-0.4363	0.028808	-0.147473	-0.313291	-0.0792055	-0.620612	0.0776203	-0.284386	-0.260251	1.08634
-0.193521	-0.796374	-2.59924	-0.539161	0.320937	-0.790494	1.34361	-0.15669	-0.111011	0.557502	0.0328044	1.04298	2.08691	0.166736	0.345537	0.503424	0.234387	0.257315	0.208881	-1.84327	0.697088	0.514019	0.677608	-0.188571	0.279157	-0.548856	-1.01438	-0.773469	-0.444336	0.258076	0.949654	0.493107	-0.284343	0.16086	0.0268385	0.639229	0.408756	-0.0174084	-0.659454	-0.131343	0.285279	0.700132	0.0481179	-0.269536	0.922322	0.31116	0.436254	0.164603	-0.318567	0.522901
12.7747	-0.159441	-0.140131	-2.24629	-0.198671	-0.148727	-0.863346	0.411359	0.331947	1.07212	0.230394	-0.301735	-1.64632	-1.21794	-0.118493	-0.466227	0.0626102	-1.16376	-0.313758	-0.999369	-1.08778	-0.734429	-0.762156	0.368746	0.379461	0.84852	0.167601	0.410676	-0.289424	-0.41082	0.201582	-0.162719	0.88413	-1.43668	0.801246	0.221495	0.723039	-0.660746	-0.460754	-0.655931	-0.17009	-0.393661	0.0322804	0.581592	0.210946	0.54692	0.444032	-0.0476209	0.188719	0.703117
3.74071	-1.96586	-0.979712	0.059148	0.791385	-0.522968	0.510409	1.83854	-0.112143	0.411797	0.0494719	0.16546	0.271667	-0.905578	1.52552	0.0635521	-1.54134	0.200803	-0.369137	0.419821	0.104819	0.465337	0.509977	-0.149649	0.962334	0.36837	0.467049	0.108618	0.743589	-0.966499	0.368632	-0.187949	0.361393	-0.31705	0.329104	0.348152	-0.868606	-0.72443	-0.0767023	-0.0288868	0.734009	0.193388	0.147756	-0.413409	0.920637	-0.599268	-0.143817	1.02211	0.681215	0.412814
10.9147	0.39742	-1.09272	0.782873	1.62008	0.902228	0.190358	0.545524	-0.511594	0.0234283	-0.502982	0.952556	0.0640842	-0.112432	-0.530016	-0.737926	-1.46245	0.114491	-0.0778116	-0.68852	0.379683	1.55435	0.0058485	-0.130129	0.250669	0.0958147	-1.43988	0.137401	0.553525	-0.085042	-0.299688	-0.8205	0.381305	0.233157	-0.209175	-0.317284	-0.233378	-0.431779	0.0494168	-0.601674	-0.304126	-0.39352	-0.371324	-0.259664	0.442407	-0.183012	0.139459	-0.194255	0.265053	0.204661
18.6393	1.09802	-0.684407	-1.53258	-0.163495	0.897234	-1.24066	-1.53448	0.653236	-1.02414	-1.00383	-0.411706	-1.02829	-0.94942	0.486787	1.79729	0.205094	-1.22694	1.70577	-0.866876	0.305107	-0.179409	-0.456483	0.217854	-0.706216	-0.841221	-0.903469	0.172219	-0.514469	0.888546	-0.299093	-0.287882	1.11119	-0.201816	0.192098	-0.106556	-0.701286	-0.638818	-0.0164227	-0.0512357	-0.707085	-0.771338	0.602982	-0.803036	0.259901	0.0132777	-0.742065	-0.126703	-0.0463756	0.739165
5.05146	1.09662	0.607859	0.602322	1.45717	-0.481406	-1.76747	0.0774473	-0.813058	-0.0336474	0.347522	0.14076	-0.0481992	-0.648503	0.670428	-1.15372	0.230243	0.607386	0.190472	0.805949	-0.345199	-0.558001	-0.826693	0.317802	0.341435	-0.00382547	0.769697	1.16006	-0.679268	0.200147	0.27339	0.0514179	0.361797	0.358785	-0.424992	-0.545215	-0.0315792	-0.226288	-0.946625	0.197012	-0.0409032	0.504556	-0.626104	-0.273803	-1.0719	0.0538429	-0.360607	-0.434357	-0.247089	-0.284813
6.53036	0.165223	-0.0513553	0.236357	-0.468573	-0.222316	-0.683042	0.480129	0.129923	-0.953665	-0.92336	-0.838065	-0.025695	-0.449945	0.231702	-0.61653	-1.95347	-0.626762	-0.528458	-0.18477	0.169284	0.329651	-1.03108	-0.219072	-1.08909	-0.19104	0.851516	0.72529	-0.554959	0.627913	0.254158	-0.571845	0.126648	-0.815089	-1.10413	0.126429	-0.0914934	-0.375402	0.789093	0.0900194	0.563652	-0.913872	0.306041	-0.90767	0.171703	0.203734	-0.732512	0.531078	0.593899	0.744646
8.65137	-0.96616	1.72605	1.59147	-0.413235	-2.03904	-0.303718	-2.16586	-0.615834	1.15599	0.918544	0.975777	-0.151072	1.10513	0.132658	-1.1261	0.201269	1.01608	0.312638	0.909948	-0.879836	0.328304	0.071446	0.085086	1.01819	-0.0674523	-0.0273202	-0.595441	0.30496	0.18024	-0.889257	-0.0367692	-0.402478	0.950411	0.404112	-0.569961	-0.211024	0.599604	0.554662	0.459042	0.448799	-0.122873	0.589337	-0.95469	-0.219111	0.265232	0.664169	-0.976812	-0.00473004	-0.0933835
8.34933	1.70972	1.69921	-1.87875	1.07887	-2.23189	-0.584514	0.0212514	-0.0226439	0.52517	1.33477	0.281185	-0.310409	-0.896715	-0.605294	-0.952856	-0.184494	0.794459	0.926153	-0.324753	2.00488	0.0766109	-0.430042	-0.426483	-0.527694	0.478724	-0.103255	0.291567	0.256224	-1.21071	0.114785	-0.408835	-0.0198894	-1.04413	-0.144022	1.0029	0.673011	-0.545282	-0.206395	-0.0505342	0.421904	-0.0223441	-0.26301	-0.975764	-0.403907	0.167484	-0.476514	-0.215714	-0.227462	0.617111
10.1363	-0.112256	-2.60003	-1.61104	-1.54604	-0.0137582	0.536053	-1.08592	-1.91297	0.893121	-0.390778	-1.67165	0.245608	-0.684286	-0.957596	-0.142713	-0.401228	-0.826874	1.0541	-0.806787	-0.539178	0.105928	0.494671	-1.30841	-0.409319	0.862486	0.680239	-0.654859	0.1936	-0.620265	-0.364497	-0.496302	-0.556009	1.2192	0.957699	0.596463	-0.102494	1.07417	-1.22663	-0.872861	-0.972235	0.175343	1.41579	0.335831	0.116363	0.251339	0.202237	0.696325	0.755456	-0.0304267
6.5333	0.302842	-2.91151	0.889033	2.4213	-0.779538	-0.502782	0.804395	0.00559197	-0.613402	0.699952	0.961641	-0.0461562	-1.09756	0.727228	0.0252414	0.666687	0.190127	-1.11271	0.473819	-0.0492982	0.52041	-0.0163523	1.14522	0.570703	0.531195	1.02698	0.988095	0.651252	1.2094	-1.46226	-0.492051	0.153992	1.02188	0.201596	0.182758	0.121247	0.454962	-0.0913073	0.70015	0.88207	-0.332173	-0.269354	-0.238124	0.333645	0.0964244	0.356844	-0.909076	-0.339829	-0.183847
7.40045	0.688915	1.07787	-1.36064	-0.769905	0.202626	0.975555	-0.458499	-1.34011	-0.767355	-0.228654	0.690853	-0.339593	-0.713733	0.428417	-1.14001	0.806689	0.267173	-1.43425	-1.03042	1.00111	1.12926	-0.179154	1.00146	-0.191742	1.14512	-0.0159752	1.24976	-1.01125	-1.39626	-0.0303574	-0.505262	1.03674	0.19692	-1.0357	0.175002	0.854205	-0.389598	-0.0222816	-0.626699	0.0679734	1.09345	1.29618	-0.942942	0.183747	-0.958265	0.476149	0.448155	-0.605967	-0.834388
2.37329	-1.26364	-0.124288	0.714654	-0.72999	-1.74593	-0.584903	0.00660887	0.189605	0.674023	-0.79632	-0.236392	-1.00947	0.171002	-0.227954	0.0777653	0.0570986	-1.09667	0.305667	0.347775	-0.37382	-0.364044	0.754661	-0.0683517	-0.260361	-0.445602	0.79926	-0.117497	0.526196	-0.399609	0.573353	-0.213298	0.0115587	0.607685	0.335531	-0.254064	0.466101	-0.396578	0.00631375	-0.756511	-0.277472	0.484244	0.526992	0.582793	-0.321846	-0.218075	0.446058	-0.307885	-0.805908	-0.572999
15.3255	0.326625	1.83476	-0.0112615	-1.07094	1.61676	-0.728875	-0.400075	-2.13381	0.421067	-0.791697	1.41325	-1.2075	-0.318679	0.748765	-1.31203	-1.20996	0.440167	-0.0972527	-1.31435	-0.0251603	-0.143622	-0.305086	-0.772354	0.278236	0.21268	-0.0635872	1.38158	0.62042	-0.404959	-0.200102	0.444001	0.494964	0.271693	1.4849	-1.57137	0.297149	-0.283878	0.463185	-1.20494	0.253698	0.131039	-0.278272	-0.643284	-0.622838	-0.597055	0.0276009	-0.244738	-0.22757	-0.130967
12.8315	3.91867	-1.71536	0.704472	0.781784	-0.588348	1.48315	-1.25598	-0.593544	0.834961	-0.838769	-1.06025	0.579979	-0.523267	0.882678	0.315241	0.408492	1.0461	-0.332007	-0.150862	-0.784849	0.924034	-0.675791	0.146208	0.456623	-0.512706	0.376138	1.01476	0.302416	-0.625428	0.822989	0.0402048	-0.212178	-0.0722327	-0.527248	-0.394294	0.612666	-0.783058	-0.460158	0.259833	1.02861	-0.80242	-0.13536	0.00145174	-0.313057	-0.412418	0.100134	-0.633128	-0.304435	0.0158627
10.9233	-0.838648	0.195197	0.341576	0.995653	0.393418	0.283517	-0.659548	0.981168	-0.589931	0.497513	-0.949152	0.946985	0.0312671	-0.962237	0.243094	-0.962123	0.629164	-0.510336	-0.450522	-1.02692	-0.157615	-0.0291685	-0.898799	0.446357	0.0558837	0.0264295	-0.432337	0.0563644	0.427748	-0.10386	0.301025	-0.446412	1.0597	0.414835	-0.0505551	0.114067	1.26787	-0.516457	0.0137287	-0.549166	0.791931	0.150578	-0.0255744	0.685348	-0.147741	0.90072	-0.0826085	0.386663	-0.778877
6.80328	3.74947	0.620496	-0.022845	-0.636463	0.390612	0.599464	-1.40157	1.65683	-1.29062	-1.16454	0.230521	1.5837	0.276213	-0.42543	-0.827388	-0.472409	-0.00863637	-0.0397834	0.363796	-0.479012	0.54736	1.64618	-0.346151	1.3381	-0.0783435	-0.961331	0.419851	-0.192399	-0.137828	0.584907	-0.194159	-0.218119	0.236609	-0.658054	1.11342	0.393184	-1.00082	0.717717	-0.0839152	-0.275261	0.651052	0.777661	-1.37356	1.08684	0.826908	0.813907	0.685843	-0.510067	-0.341711
9.78142	-2.70993	1.34233	0.916	0.0919356	0.351376	-0.915943	0.547823	-0.149278	0.681282	0.73358	0.543318	0.0565968	-1.64608	-0.814804	-0.550005	-0.905338	-2.0476	-1.25378	0.0526787	0.0863105	0.503348	-0.0735274	-0.487709	-0.758082	-0.212498	0.445777	0.365961	-0.674866	0.284863	0.296599	0.379085	1.34946	-0.0541383	-0.236037	0.352046	0.514988	-0.0704019	-0.0771673	0.906693	-0.0304098	-0.158506	-0.597539	-0.181379	-0.30039	-0.0044162	0.178326	-0.0423538	-0.868906	-0.121743
6.75126	-0.380316	-0.299041	2.2583	1.66687	-0.345111	-1.97889	0.473857	1.44976	-0.795025	0.447299	-1.14399	0.0793098	-0.0543961	0.405041	-0.793644	0.519409	0.30705	-0.561682	-0.663069	-0.0242819	0.618491	-0.884727	0.545512	0.996187	-0.00865155	0.918574	0.202014	1.08995	-0.495542	-0.358176	0.240296	-0.402379	0.809747	0.0746523	0.405498	-0.194263	-0.549796	-0.329111	-0.408038	0.0249151	-0.342669	0.313354	-0.475545	-0.363668	0.477417	-0.127256	0.636596	-0.558267	0.0120833
5.88524	0.224931	-1.38508	-0.228988	-0.000548193	0.100921	0.220134	-0.294485	1.12567	-0.26014	0.203145	-0.244918	-1.04362	0.772917	-1.57336	-0.563801	-0.442752	-1.24439	-0.587886	-0.22467	-0.533239	-0.00078625	0.341445	-0.300813	-0.39239	-0.160039	-0.191193	-0.00557212	0.391886	1.00407	0.364927	-0.0708356	0.336321	-0.556938	-0.31582	0.299924	-0.863255	0.310885	-0.800823	0.216209	-0.41569	0.28336	-0.243626	-0.154707	-0.467452	-0.403316	-0.415561	0.348222	-0.156258	-0.474839
10.1644	2.33078	-0.247159	-1.89314	-0.802346	0.383015	0.658545	0.478063	-0.313972	-2.09888	1.08602	-0.108485	0.766433	-0.732289	0.195311	-1.1082	0.94565	-1.81758	0.604308	-0.952563	0.822574	0.559769	1.90904	-0.417455	0.290764	0.46428	1.31162	-1.66583	0.401754	0.198304	1.0467	-0.476728	-0.421923	0.155231	-0.19129	-0.799686	0.0962118	-0.301545	-0.705866	0.876478	-0.313325	-0.0616476	0.36714	0.386877	-0.772328	0.0847399	-0.319874	-0.580492	-0.364338	-0.35316
8.63963	0.467961	-1.096	-0.423984	0.441683	-0.676221	1.47287	1.5303	0.353217	0.809538	-0.642923	-1.02539	0.150916	-0.278578	-0.067559	-0.246286	-1.23411	0.449396	0.269756	0.49839	-0.794706	0.161386	0.638345	-0.0105129	0.715698	0.733299	0.163561	-0.384815	-1.1138	0.655963	-0.321541	-0.56445	0.0120925	0.42033	0.392135	-0.819298	0.621431	-0.243539	-0.284037	0.819641	-0.0962583	-0.383213	0.898333	0.268296	0.571167	-0.728853	-0.411006	0.208459	0.0877513	-0.442785
11.2699	0.484194	-0.773418	0.120554	-0.715741	0.732762	1.28328	-1.80912	0.982122	0.462321	-0.28544	0.604087	-0.390829	0.459349	0.312041	1.73499	-0.367756	-0.60502	2.39353	-0.972726	0.936303	-0.919451	-0.207387	0.587814	0.813981	0.00400178	1.15009	0.896459	-0.370814	0.229856	0.0196313	0.581425	0.285682	-0.80342	0.254234	-0.0959166	0.257653	-0.69821	-1.09	0.247138	0.106848	0.409199	1.47325	0.592787	0.366373	-1.5636	-0.192347	0.324092	0.671101	-0.929354
2.77623	0.526826	-1.2811	-0.563063	0.199725	0.0395191	0.797355	0.499385	1.3582	0.843995	-1.27888	-0.262901	-2.48419	-0.816697	0.753578	-1.3852	1.01652	0.947876	-0.340959	-1.02757	0.310657	-0.762021	-0.255502	-1.345	0.493279	0.501927	-0.54483	-0.150952	-0.807528	0.378091	0.24391	-0.53251	-0.915041	-0.520539	-0.565165	0.372049	-1.20832	0.0861903	0.68626	0.227249	0.756196	-0.681445	0.234367	-0.794706	0.463714	0.419833	0.549443	-0.56897	1.09268	0.283816
8.94708	2.45267	-0.648811	-0.313888	1.79736	0.999843	-0.12623	0.306445	-1.67908	3.01143	-0.340764	-1.34042	-0.894494	-0.611856	-0.44972	0.022835	0.0583978	1.28389	0.659086	0.698714	-0.898351	-0.0796862	0.736861	-0.610217	1.15908	-0.332643	-0.785785	0.646874	0.209344	0.805799	0.556212	-1.14524	-0.294378	-0.515633	0.842852	0.219575	-0.125269	-0.534267	-0.581864	-0.857555	0.0054878	0.664235	-0.065771	-0.684715	0.0271711	0.00127298	-0.178527	0.240879	0.55808	0.330551
15.9312	2.36494	-3.69068	-1.84025	0.180882	0.365334	-0.421112	0.591831	-1.36184	-1.81631	-1.17671	-1.56205	0.608278	0.627866	-0.776301	-0.853852	0.565499	0.923824	-0.290861	-0.397077	-0.994792	-1.21943	1.98893	-0.827186	0.720973	0.582393	-0.0604911	0.146957	-0.22634	0.755976	0.531133	1.09158	0.57306	0.53708	-1.45527	0.177949	-0.225321	0.447456	1.17819	1.30092	-0.525701	-0.457585	0.150676	0.668448	-0.162417	0.802558	-0.0249622	-0.788814	0.381595	0.0933692
3.80945	-0.845082	1.35678	1.54723	1.87594	-0.286339	-0.313913	-1.24492	-1.45197	-0.216985	0.799821	0.210349	-1.712	0.739097	0.525096	-0.789709	-0.399999	-0.105235	-0.301325	1.33492	-0.288551	-0.809824	0.0520339	-0.0402915	-0.885689	0.545855	-0.437376	1.51043	-0.345764	0.967949	1.14968	1.46204	-0.258341	-0.297313	0.564948	1.37128	0.0137384	0.160205	-1.4662	0.666422	0.504584	-0.444718	0.0369886	0.184251	-0.120531	-0.36072	-0.0142193	-1.00701	-0.42848	-0.266013
-1.6491	1.50406	-0.667562	-0.203165	-1.43747	-0.138562	-1.07895	1.59275	0.424391	0.925254	-0.681602	0.154573	-0.0330984	0.723049	0.754974	1.14389	0.437328	-0.173409	-0.110171	-1.87747	0.791102	-0.317733	-0.00889226	-1.11335	0.128111	1.17936	1.25769	-1.21066	1.56148	0.243743	0.415029	-0.390087	-0.148999	-1.23657	2.06627	0.794025	0.25148	-0.562768	0.139713	-0.392527	-0.194217	-0.328848	0.248686	-0.260138	0.565678	0.519644	-0.107076	0.698447	0.232886	0.0249257
18.3567	0.957044	-0.111593	-1.48818	-0.0521473	-0.274412	-2.37747	0.327631	-0.674068	0.465004	-1.27231	0.61338	-0.0777736	-1.24794	-0.833328	-0.397168	-0.976259	-0.0673026	0.145545	-1.48806	0.542123	-0.254489	0.495076	1.18182	0.735616	0.569261	-0.582787	-0.452885	-0.23534	-1.62233	0.560716	-0.160814	-1.49805	-0.234509	-1.05908	1.26001	-0.133346	-0.0274369	0.382982	0.909356	0.27123	-1.0043	0.898976	1.4403	-0.180706	0.269033	0.624174	-0.0301923	-0.353112	-0.563594
13.0788	-0.409063	-1.97523	-0.939555	0.713537	1.1081	-2.14044	-0.378035	0.0444771	1.63431	-0.032116	0.991151	-1.9852	-1.33101	-0.601724	-1.10264	-0.739389	-0.791505	-0.434111	0.762819	1.03125	0.0589647	0.828281	-0.467838	-0.482352	-0.389007	0.409372	-0.518411	0.364409	0.138023	-0.0832246	0.0140493	-0.526137	0.567049	-0.441229	-1.15283	-0.972453	0.490573	-0.45186	-0.583998	-0.000676785	-0.21726	-0.269321	-0.544655	0.636983	0.598548	-1.37378	-0.191901	0.546114	-1.06429
7.25526	-0.432715	0.878369	2.32943	1.81698	-0.647278	-0.0106605	-0.653739	-1.6657	0.00690658	-1.5203	1.76537	-0.0571863	0.134613	-1.13021	-1.38453	-0.378349	-1.09221	-0.121718	-0.760951	-0.617694	-0.12214	-0.787083	0.860689	0.582274	1.39737	0.587548	0.74151	-0.397779	0.160053	-0.255074	0.596571	-0.424766	0.432613	-0.540041	1.32558	0.0951428	-0.694675	-1.02081	0.677072	-0.72124	0.947019	-0.317664	-0.135396	-0.852548	-1.08321	-0.405101	-0.0645343	0.392061	-0.62145
16.5607	1.39212	2.0511	-1.90888	-2.64246	-0.818284	-1.60824	-2.01294	-0.511387	1.44103	-0.169087	-1.07756	2.1878	-2.04094	-1.58939	-1.0616	-1.01562	0.117847	0.777792	1.09538	0.110946	1.01413	-1.0921	0.289169	0.531293	-0.0479506	1.02661	-0.498182	-1.52941	0.0329798	0.743851	1.73593	0.324702	-1.35467	-0.378163	0.749623	-0.379761	0.246891	-0.855056	0.361208	0.753909	1.04535	0.173293	-0.122281	0.818924	-0.0130827	-0.60364	0.800911	-0.220281	-1.14217
8.18304	2.11631	-2.74657	-1.11288	-0.693444	-0.963957	-1.03497	1.284	1.10391	0.162051	1.11046	-0.806556	1.76171	-0.176328	-1.0033	-1.40804	0.0288992	0.12812	1.02283	0.139697	0.264024	-0.556149	0.129518	-1.46852	-1.54248	-0.0566148	-0.575745	0.592869	-1.3225	-1.6477	-0.119882	0.737293	0.29915	0.421455	-0.41012	-0.271108	0.348143	-0.508285	-0.575308	0.358551	-0.726973	-0.0404067	-0.653172	0.401562	0.307904	-0.317556	-0.731388	0.254498	0.98597	-0.585164
5.7769	-1.30451	-1.01459	1.47895	0.911654	0.226915	-1.69031	1.18439	-0.414476	0.703297	-1.42359	-1.17056	0.169717	-0.020564	-0.237368	-1.02299	0.906646	0.477669	0.286028	0.0426284	-1.06835	0.730129	1.04712	-0.243896	0.192581	0.470176	-0.274552	-0.453814	-0.987528	0.290344	-0.0284814	-0.39722	-0.433675	0.374581	0.135381	1.10471	-0.073676	0.0672648	0.611304	0.0488981	0.816993	-0.31924	-0.0156845	-0.420436	0.386794	-0.613275	-0.173242	0.342854	0.444753	0.457657
9.40865	3.30971	-2.71077	-1.45055	3.62266	-0.010704	0.514436	-0.311388	-0.448413	0.413662	-1.83001	-0.380911	-0.908149	-0.121057	0.0149088	0.575898	-0.0696723	-0.326514	-0.537581	0.0276164	0.655555	0.316416	1.11272	1.50176	0.0877094	-0.513565	0.186553	-0.954728	1.35854	-0.0486389	0.0562714	-0.231475	-0.200308	-0.673146	0.263466	0.149705	-0.551606	0.0935943	0.610912	1.23663	0.750066	-0.693535	-0.271756	-0.108505	-0.724446	-1.09074	-0.0333293	-0.906052	0.290772	-0.55854
5.25556	0.0434643	-0.390905	-0.322551	1.48584	0.449137	-1.71023	0.353766	-1.28176	-1.21711	0.572729	-0.698214	1.21549	-0.282851	0.765614	-1.27175	-0.0440222	-0.375461	0.42524	0.465336	0.293086	0.0485212	-1.83302	-0.526859	-0.227157	0.0722957	0.63719	0.399608	0.773182	1.09655	0.303355	-0.190118	-0.207776	-0.340302	-0.158292	0.163041	0.960302	-0.233505	0.745513	-0.34848	-0.142626	0.390421	-0.0673999	-0.187572	0.676703	-0.269367	-0.885408	0.850867	0.293594	-0.117751
10.5241	2.94418	-2.01473	-1.51659	1.18298	0.00388808	-0.388384	0.564478	-0.452707	0.403323	-0.195417	-1.02764	-1.15629	0.232757	-0.917441	0.393033	0.273829	0.783455	1.06019	0.404492	-0.642013	-0.0535196	1.20267	0.0383531	1.35391	-1.36447	1.09971	0.142268	-0.266122	0.512943	-0.391122	-1.64215	-0.303235	0.375651	0.35167	0.557193	0.23776	-0.0140951	-0.54571	-1.15358	-0.698974	0.458758	-1.0131	-0.40123	0.562933	-0.232059	-0.930779	-0.166943	0.473829	-0.332206
12.4251	3.12429	-2.84099	-1.38798	-0.505931	-2.88029	-0.271241	-0.355943	0.92583	0.773822	0.140121	-0.00280243	1.05767	-0.310701	1.13968	0.950819	0.848671	1.57305	-0.326852	-0.89181	1.18364	0.024304	1.52597	1.51677	0.0647391	0.0125025	-0.148233	1.22153	-0.440645	-1.20735	0.106003	0.0860252	0.427626	-0.0931998	1.31647	0.021279	-0.344286	-0.22341	-0.38158	-1.58462	0.528896	-0.0115786	0.620173	0.349814	-0.0190157	0.301454	-0.338881	-0.365621	1.14942	-0.00478637
-4.72256	-0.289508	-2.3251	0.179416	-2.67319	0.668964	0.557516	0.759399	-1.90597	-0.919902	0.284222	0.365687	1.55253	-1.72582	1.30668	-0.594935	0.208365	-1.20058	0.605426	-0.648705	-0.466888	-0.0858129	0.862913	-0.62395	0.66854	0.462677	0.601675	-0.0502868	0.437039	-0.29305	-0.220782	-0.50371	0.44635	0.991272	0.761871	0.126475	-1.43799	0.132969	-0.0253098	-0.640052	-0.20478	-0.649851	0.489746	0.648819	0.472732	-0.2229	0.0249232	0.52257	-0.725569	0.367656
7.62884	-0.887575	-0.412623	-1.64867	0.512995	-1.76339	-2.1066	0.565358	-0.154103	0.821732	-0.732962	-1.07296	0.257784	-1.79068	0.692008	0.254849	-0.533538	0.847982	-1.74385	-0.316948	0.219709	0.871428	-0.133735	-0.210748	-1.01939	-0.327245	0.346351	0.526275	-1.33176	0.117364	0.536186	-0.755019	-0.096348	0.608135	0.488535	0.615219	-0.348848	0.27358	-0.416607	-0.193521	-0.144679	-0.225033	-0.247229	0.368757	-0.465263	0.37478	-0.446863	-0.0466188	-1.05864	0.382606
8.18569	-0.209437	-0.688333	-0.0422524	-0.780934	1.3714	1.32445	-0.378315	1.86392	1.39343	-1.90918	1.96906	1.15209	-0.0907781	-0.205284	-0.0975338	-1.16602	-0.256037	-1.11583	-0.829969	1.20969	0.165055	-0.848709	0.425255	0.00510105	-0.936907	-1.56443	0.236647	0.481153	0.843955	1.55094	-0.724517	1.09094	0.100857	0.0186112	-0.299549	0.154449	-0.33956	-0.0468446	0.379724	0.104288	0.865531	-0.222282	0.340245	0.00637534	0.801027	0.170384	-0.403864	-0.479429	-0.110059
10.3601	0.411021	-0.477248	-1.00303	-0.667855	-0.275315	-0.631935	0.667736	-0.102015	-1.55532	-0.670993	-1.29321	1.10062	1.09677	0.587746	-1.04572	0.642976	-0.454852	-0.807784	-0.255186	-0.985992	0.488436	-1.00613	0.66915	-0.358312	0.513785	0.265629	-0.0501231	0.45877	0.636381	0.368499	0.144143	1.13242	0.40753	-1.36219	0.359266	-0.769115	0.948223	0.370242	0.299934	0.812344	-0.187016	0.400584	-0.704025	0.154807	0.879015	0.561285	-0.059037	-1.06202	-0.474248
7.81809	0.377426	-0.548599	1.15169	-1.40533	0.967505	-1.38851	0.925821	0.656957	-0.212783	0.406356	0.560679	-1.01614	0.638969	1.1343	-0.927254	0.0401948	-0.876645	-0.457645	-0.336821	-0.246985	0.10216	-0.435986	-0.766676	-0.38486	0.683517	1.07238	0.0660436	-0.192456	-0.47916	0.573942	-0.846401	-0.285283	0.239701	-0.0695945	0.132651	0.0539606	-0.738347	-0.213147	0.0640754	-0.752013	0.234876	-0.783444	-0.197751	-0.282385	0.18665	0.991529	-0.0159289	-0.230439	0.993289
18.9921	1.00398	-1.45484	0.0770585	1.91707	-0.318867	2.92315	1.58846	1.01036	0.0126197	0.619948	1.57481	-0.620885	-2.21548	-1.28391	0.424104	0.304201	-0.308502	0.377245	0.148189	0.342825	0.237617	-0.848332	0.83926	0.684611	0.576989	0.175063	-1.01254	0.287959	-0.929068	0.750723	-0.0254629	-0.519299	-1.48644	-0.0472565	0.121851	-0.214207	0.646385	0.171209	-0.582547	-0.834498	-0.215722	0.3381	1.72432	0.616817	0.376344	-0.0900677	-0.622351	0.199353	-0.585748
3.44938	-1.63257	-1.9693	0.0782441	1.25633	1.32971	-0.119582	-1.03282	0.64506	-0.629657	-1.17774	0.388958	-0.305431	0.555018	-0.489995	-1.05056	0.143392	0.941064	0.67873	0.1605	0.340836	0.164163	-0.463791	-0.628546	0.509158	-0.190551	-0.852884	-0.14399	0.610403	-1.19764	-0.361437	0.317422	0.365132	0.271401	0.422692	-0.997655	-1.08865	-1.30385	0.709907	-0.398989	1.16446	0.951311	0.412752	-0.565682	0.474215	0.0530997	0.293286	0.179396	-0.0611063	-0.13664
11.4405	1.49673	-1.06894	-1.86893	-0.510928	-1.18445	-2.95103	0.00963655	-0.0967162	0.25605	-1.34558	0.356773	-0.946009	1.25696	0.291582	-0.71493	-1.17925	0.131712	-1.25977	-0.113861	0.361373	-1.42474	0.363564	-0.253586	1.9861	-0.856182	1.50842	0.096157	1.61799	-0.920093	0.919957	0.686605	0.254591	0.672189	0.362828	-0.14651	0.102903	1.10543	0.608657	0.596949	-0.368098	-0.732899	-0.134895	-0.0256849	-0.506339	-0.747029	0.137337	-2.17658	0.102719	-0.258098
12.2769	0.210545	0.864683	-0.970333	-0.855195	0.414974	-0.827846	0.233992	0.311357	-0.295287	1.56792	-0.172081	-0.360149	0.607607	-0.316599	-0.375315	0.874555	-0.485833	0.0613971	0.815098	-0.0258974	-0.7985	0.788068	1.45236	0.0570504	-1.07009	1.46924	0.817063	0.712954	-0.726511	-1.15615	-0.125057	-0.497441	-0.860761	1.02687	-0.196371	0.0839101	0.472391	0.357808	1.07897	0.511562	0.489885	-0.219894	0.942778	0.98906	0.471604	0.620596	0.546065	-0.363203	-0.283457
7.11939	0.705439	-0.543553	-0.14577	-0.0591091	0.582167	-0.714736	0.213568	0.874015	-0.721358	-1.37627	-0.805096	-1.09117	0.0100334	0.354449	-0.561747	0.607391	1.33985	-0.777134	-0.342368	-0.20289	-0.341454	-0.308673	0.811841	-0.618858	1.11439	-0.328743	0.382141	0.128143	0.145982	-0.239227	0.148251	0.655884	-1.26724	0.456387	-0.943221	0.0842054	-0.261806	-0.991995	0.140578	-0.815382	-0.768728	0.0661948	0.584687	0.586225	-0.58337	0.122875	0.109031	-0.705192	-0.279715
14.4549	1.4361	0.0980562	-0.660306	-0.930641	-0.582282	-0.595803	-0.0729542	-1.24444	-0.240595	0.124365	0.9446	1.47844	0.772016	-0.347177	-0.622999	0.110939	0.081969	0.435814	0.25114	-0.872241	-0.506259	0.0466796	0.163646	0.280172	-0.0038509	-0.669058	0.597733	0.495775	0.00924097	0.176047	-0.435155	0.539857	0.0999077	0.699078	0.897327	0.384962	-0.0142676	0.176255	0.377518	-0.846098	-0.166415	0.123469	-0.672717	-0.403996	-1.03278	-0.0197508	-0.60261	0.106218	-0.550873
2.28473	0.341091	-1.22393	0.438294	1.32153	-1.26723	-0.078116	0.145885	0.216612	0.934954	-0.665004	-0.860314	-0.439253	0.671375	1.15722	-0.362458	-0.372826	0.902756	0.010177	-0.2411	0.161748	-0.196797	0.0744384	-1.44485	-0.455683	-0.798871	0.00948009	0.276132	-0.405284	0.93798	0.704098	-0.491614	-0.349479	-0.431005	-0.248211	1.05769	-0.599486	-0.808819	-0.384623	0.771047	0.099014	-0.513888	0.735725	0.371049	-0.521229	0.615257	0.496203	0.773774	-0.182873	-0.35715
2.39792	0.134243	-2.32149	-0.425124	-2.15509	0.43935	-2.03588	-0.502956	-0.254237	-1.56589	0.608925	-0.220616	0.189062	1.48556	0.283823	-0.262993	-0.378228	0.386638	0.380674	-0.274341	0.036332	-0.107572	-0.904683	0.801199	-0.384701	-0.855398	0.60447	-0.516351	-0.884665	1.04369	-0.630717	0.400762	-0.586914	-0.665903	-0.0794508	0.0159316	0.656164	0.855296	-0.276386	0.00143942	-1.26642	-0.414871	-0.310973	-0.457832	0.413894	-1.13314	-0.317561	0.3551	-0.562067	0.430512
2.86433	-0.986746	-1.30147	1.11999	1.01851	-2.15353	-1.23428	-1.04429	0.875182	0.316957	0.508363	0.879301	-0.627095	0.441755	0.52885	-0.390637	-1.32606	-0.147924	-0.896917	0.15673	-0.810259	-0.357998	-0.457772	0.230998	1.16709	-0.841713	0.27684	-0.996799	0.0296326	-0.112775	-0.273838	-0.666236	0.232626	-0.296751	-0.511787	-0.0782819	-0.575434	0.212854	-0.247714	0.0298693	-0.650596	0.557992	0.155576	-0.326682	-0.530582	0.522648	-0.582667	0.528729	0.0559616	0.258709
4.37926	0.0250915	0.141021	0.541361	-0.231036	-0.00642752	-0.214947	-0.0377604	0.18017	0.256879	-0.879889	-0.0534847	-0.125125	-0.870455	-0.616753	0.179498	-0.111214	0.648389	-0.0317517	-0.649564	0.194406	0.470245	-0.517112	0.399273	-0.381921	-0.839063	0.203834	0.198546	0.117521	0.177226	1.1387	0.365429	-0.532356	0.128145	0.743797	-0.256153	0.769353	0.14507	-0.146995	0.938374	0.215503	-0.0890443	-1.03141	0.221025	-0.299087	0.182821	0.391594	-0.0102389	-0.182824	-0.0387217
-1.25345	-3.30904	0.0884894	1.11742	0.188359	-0.991057	-0.412836	-0.10462	0.639311	-0.66309	-0.338065	0.529739	-0.00317108	0.505231	-0.725088	0.335351	0.204286	1.01465	-0.0914959	0.252827	0.984266	-0.889675	-0.586395	0.103713	0.00139016	-0.0896391	0.602863	0.0887975	0.133997	-0.896613	0.389636	-1.31778	-1.07195	-1.33754	0.145557	-0.395615	-0.168949	0.22471	0.569794	0.0543398	-0.104774	-0.0747129	0.5315	0.400348	-0.104304	-0.126759	-1.55133	0.357803	-0.0237253	-0.0159747
8.63658	-1.38481	1.27867	0.640774	-0.351236	-2.59582	2.77743	-1.64154	1.23408	1.14219	1.01991	0.0833198	0.527192	0.130616	0.368654	-0.00439004	-0.698412	1.0436	0.0293371	-1.02829	-0.555626	-1.45152	0.078778	-0.0632265	-0.527213	0.518451	-0.354715	-0.940332	-0.267217	1.25554	0.18558	-1.15303	1.64146	0.55039	0.00539955	0.0352374	0.0133644	-0.0786469	-0.0898367	0.568591	0.253357	0.356914	-0.79458	-0.437837	0.107126	-0.397665	-0.213618	-0.580157	-0.176459	0.441966
1.3154	-3.64316	-0.423401	2.16931	1.49438	1.0549	0.553213	-1.45776	0.960908	0.365968	-0.0991133	0.330716	0.471504	0.0217	0.120463	-0.905853	-1.91921	-0.503627	0.228762	-0.654008	-0.177549	0.96051	1.5863	-0.390816	-1.05302	0.546586	0.6571	0.118028	-0.498944	0.414302	0.45731	-0.181817	-0.634801	1.11192	0.271246	0.427522	-0.106448	0.214045	0.117332	0.463972	0.0846899	-0.48119	-0.411775	0.233007	-0.167098	-0.101323	0.289561	0.258368	-0.282732	0.691555
3.12297	-0.390564	-2.52639	1.57881	1.48233	-0.537014	0.791208	1.17672	-0.483767	0.554505	-0.488169	-0.361656	0.458607	0.157397	-0.864095	-0.028259	0.958141	-1.12881	-0.282384	-0.263425	0.271212	-0.469362	0.0100597	1.4655	-1.07615	0.0677877	1.88608	0.793139	0.068941	-0.102276	-0.207645	0.362441	-1.05245	0.125287	-0.240804	0.347304	-0.107867	0.448079	-0.062643	0.410649	0.529449	0.998122	-0.567373	0.532151	-0.700563	-1.24181	-0.17413	0.520546	0.491138	0.600649
7.29824	0.331546	0.405295	2.13331	0.166218	-1.25972	-0.376517	-0.928196	0.709177	1.44149	0.3464	-0.761134	0.30941	-0.00101737	-0.450556	-0.725762	-0.770091	0.41616	0.00388261	0.67716	-0.53321	-0.204879	0.256405	-0.862984	0.334116	-0.123551	-0.595385	-0.361712	0.741095	0.0346455	-0.853195	-0.378208	-0.156374	-0.222408	-0.593369	0.73937	0.410808	-0.306779	0.201324	-0.418192	-0.798347	-0.203064	-0.962598	0.712486	-0.352137	-0.557989	-0.903602	0.10793	0.648284	-0.608811
5.11525	1.12211	-0.13033	1.91747	0.565	-1.01124	1.30404	-0.650744	0.821865	2.13023	0.0768585	0.30737	-0.108772	0.509005	0.256184	-0.625243	0.601857	0.828536	-0.180772	0.91695	0.541903	0.220353	0.939548	-0.0112487	-0.453722	0.595493	-0.66082	-0.274393	0.55555	1.25119	0.0326465	0.227809	-1.036	-0.219272	-0.631187	0.384484	1.00194	-0.21549	-0.580402	0.227381	0.607559	0.0267257	1.19186	0.562794	0.693609	-0.110704	-0.594945	-0.334604	0.00134092	-0.134394
6.22504	0.0190652	0.290171	3.23331	1.72176	-0.262159	-0.489471	-0.976079	0.592907	-1.79504	0.101616	-0.573024	0.463788	-0.515999	1.32715	0.306583	-0.65525	-0.353149	-0.946161	-0.64478	0.453432	0.271723	-0.347883	0.0255617	-0.347747	-0.707526	0.493847	0.374771	-0.786241	-0.557373	-0.913234	0.422621	-0.88312	-0.869831	-0.288442	0.277014	0.788942	0.379309	0.403267	0.56033	0.588135	-0.039623	-0.214737	0.208982	0.481114	-0.241067	-0.204499	-0.76248	-0.679834	-0.664124
4.03295	-1.12539	-0.0888549	0.643002	0.443476	-2.62992	-1.24807	0.502912	-0.499379	0.217521	-1.32564	0.201533	0.496036	-0.752603	-0.344724	-0.306645	-0.42426	0.485601	0.824607	0.206151	-0.113303	1.24995	-0.376833	0.305559	-0.214267	-0.44389	-1.16394	0.937677	0.616592	0.148906	0.734399	-1.16141	0.177636	0.342024	0.220351	-0.262248	-0.452561	0.0109447	-0.371284	-1.30596	0.529866	0.346914	-0.253908	-0.127343	-0.0303395	0.171557	0.150002	-0.339941	0.561899	0.165919
6.74078	-0.574415	-0.498396	-0.107275	1.35691	-0.441062	-1.52607	0.518395	0.457612	-1.41811	0.481099	0.858003	-0.0247753	-0.944351	-1.09042	-0.868167	-0.378051	-0.817501	-0.24632	-1.14201	0.938685	0.358671	-0.227226	-0.0630076	0.0608526	0.541788	0.174959	-0.994126	0.034381	-0.139837	0.0293347	0.289087	0.314997	0.328838	1.07795	0.813175	0.0482588	0.231251	0.463806	1.69342	-0.059594	-0.822867	0.604393	-0.310379	-0.696816	0.785153	-0.158888	-0.325492	0.104793	-0.504154
2.32286	0.567696	1.43558	-0.90832	-0.28117	0.148421	-1.37566	0.961897	-0.766173	-0.61803	-1.01346	0.327479	0.893516	-0.753525	0.082342	-1.36654	0.273323	0.809356	-0.0511334	0.746456	-0.640469	1.13137	-0.0912564	-0.265331	1.44315	0.202525	-0.460675	1.23685	0.314983	0.0520516	0.689059	0.858142	-0.895526	0.112587	0.1552	0.191684	0.328861	-0.34251	-0.181204	0.143975	1.07316	-0.647317	0.277126	-0.238316	-0.684589	-0.350289	-0.726065	0.234101	-0.58742	0.0410913
5.63296	1.98781	-2.20786	-2.36858	-0.163473	-0.645918	0.502643	0.129721	1.2672	0.0851338	-0.974898	-0.229371	-0.0621342	-0.413052	-0.105459	-0.325319	-0.830004	0.187552	-0.384742	-0.106995	-0.0386373	-0.0582828	0.0507083	-1.70646	1.51592	0.0691315	0.0700045	-0.141992	-0.208964	0.397559	-0.755274	0.987879	0.111933	-1.12871	0.520588	-0.39965	-0.847718	0.703369	-1.22084	-0.0286475	1.30378	0.465291	-0.469572	-0.483549	-1.19056	-0.250321	0.041549	-0.0828062	-0.88294	-0.216913
5.24905	1.91187	0.341988	0.238212	-1.95461	0.663895	-0.765189	0.354338	-0.341502	0.134135	-0.131504	0.284802	0.359305	0.686656	0.658958	-0.788632	0.982407	0.444185	0.922119	0.44453	-1.46472	0.670249	-0.205934	-0.106368	-0.916424	-0.145885	0.689748	0.212443	-0.232975	-0.186053	0.251432	0.278042	0.892886	-0.709003	-0.0380892	-0.747584	-0.173702	-0.103292	0.800048	-0.868907	-0.750792	-0.172378	-0.339321	-0.261848	-0.182377	0.124506	-0.423665	-0.775807	0.0351298	-0.14971
9.54321	-0.286851	-1.13512	0.350377	0.00413234	0.380343	-0.69638	-0.870983	-0.269211	-0.412264	-0.941636	-0.40189	1.10297	0.121002	0.114755	-0.462406	0.407805	0.189132	1.18542	-0.84333	-1.43222	-0.602815	1.12756	0.537636	-0.101327	0.75646	-1.36316	1.06686	0.0713249	-0.0991286	-0.455055	-0.578451	0.617882	-0.252292	0.903416	0.657548	-0.537142	-0.251037	0.162253	-0.505996	0.317151	0.590672	-0.207832	0.113061	-0.171492	0.152092	-0.543062	0.031966	-1.20993	0.237739
2.46379	-1.14969	-3.05068	-0.278986	0.0931321	-1.56259	-1.67681	1.22819	-0.0169534	-0.202498	-0.373674	1.67345	-0.334915	-0.449134	0.18573	-0.879999	0.99323	1.18412	0.0774546	-0.200708	-0.697119	-1.05961	0.2641	-0.53898	0.702171	0.646418	1.16792	0.232322	0.775277	0.70436	0.828855	-0.698437	-1.09014	0.020994	0.143603	-0.459156	0.160448	-0.284054	-0.0801762	-0.482149	-0.383525	0.00216507	0.0808757	-0.457491	0.483733	0.307973	1.01059	-0.0436767	-0.176522	-0.023886
-0.0739942	-2.13183	-0.634279	1.73208	-0.663974	-0.73937	-0.225504	0.234173	1.0924	-0.999901	-0.471896	0.530849	-0.195883	-0.139891	0.318002	0.475404	1.34848	-0.000448225	0.0374036	-0.662675	-0.421108	0.329897	0.4661	-0.884616	0.432282	0.542176	0.0149203	-1.01636	-0.0763341	0.0651053	0.358636	0.224869	-0.662069	-1.26339	0.00602545	0.691682	-0.141554	-0.615043	-0.0466616	-0.0137938	-0.194439	0.537599	-0.366337	0.669137	0.106774	0.310462	0.0666417	-0.189402	-0.460968	0.41213
-0.449537	0.592794	-3.56811	-0.106908	0.689461	-0.323864	-2.95257	-0.603344	1.08611	-3.21246	-1.09981	-0.388808	0.0760114	-0.0753032	0.176493	0.404296	0.284683	-1.30756	0.912366	1.18076	-0.957368	-0.861649	0.165942	0.628062	-0.831768	0.413376	0.455744	1.12504	0.361977	0.123296	1.04768	-0.150867	0.0369842	0.0318441	-0.439875	0.278989	0.735055	-0.507327	0.65307	-0.631963	0.40766	-0.843386	0.860527	0.310998	0.267125	0.0788079	0.434583	0.782088	0.0880406	0.539405
15.0338	2.57229	-0.902955	-1.64802	-1.30171	-1.26186	1.24161	0.803592	-0.938188	0.146293	1.23224	0.750476	-1.10714	-0.720613	-0.174794	0.199676	-0.581657	0.206804	0.338201	-0.457683	0.247581	-0.968528	-0.318611	0.122402	-0.683839	0.0664477	0.12711	0.716349	0.379573	0.457894	0.17907	1.19929	0.575483	-0.354791	-0.297954	-0.0608512	-0.728615	-0.0482682	0.711898	0.148907	0.429499	-0.26999	-0.485381	-0.26106	0.751088	1.27712	-0.731889	0.186129	0.14205	-0.0506923
5.14919	0.248694	-1.44371	0.593773	-0.158032	-0.874784	-0.0168038	-0.405299	0.317681	-0.146005	0.619588	-0.311491	0.150766	0.333986	-0.175892	0.272028	0.649957	-0.866444	-0.18027	0.297058	-0.502791	-0.62244	-0.873706	-0.445249	-0.274502	-0.437369	0.249317	0.24701	-0.579427	0.250851	0.613819	0.0739379	-0.545813	0.131194	-0.424002	-0.550817	0.0565636	0.634694	-0.0305017	-0.337917	0.0905954	-0.569025	-0.706511	-0.80171	0.120618	-0.850737	0.375841	-1.22424	-0.0538747	-0.000803792
8.26742	0.493199	-0.0945819	1.97862	1.67344	0.599863	0.0170861	-2.3457	-0.461309	-0.172104	-0.726791	0.610997	-0.639245	-0.548823	1.27999	0.697753	-0.138573	-0.975808	-1.55281	-0.4506	1.7667	-0.468711	0.733924	-1.17668	0.164765	0.449193	-0.596115	-1.08709	0.1219	0.377202	-0.59721	-0.0514035	0.980919	0.306941	0.107638	-0.178785	0.86915	0.410329	-0.156314	-0.985411	0.748792	-1.04493	0.470468	0.611091	-0.794819	-0.368822	0.674999	0.797185	-0.318142	-0.508904
6.71884	-0.701442	-0.0305208	0.229404	2.20309	-0.647359	1.13542	0.202519	-1.56132	-0.0334578	-0.0144476	0.0969197	0.988896	0.57879	0.413854	-0.380066	-2.35599	0.919312	0.223367	-0.827291	0.330896	0.404818	-0.0175248	-0.670194	-1.00598	-0.678118	-0.855282	0.842514	-0.103273	-0.606202	0.305866	0.563265	0.706168	-0.152723	0.13263	0.412814	0.37468	0.122041	0.91531	-0.449316	-0.42799	-0.313608	0.398118	-0.971069	-0.268193	0.284818	0.782551	0.0662071	1.41483	1.14168
10.859	0.611382	0.879455	-0.682887	-2.34254	-0.452087	-2.07596	-0.590039	-0.892738	-0.220836	1.21206	-0.131748	0.733787	-0.242609	0.258553	-0.269973	0.195323	0.421401	-0.447565	0.338761	-0.330243	-0.629136	-0.625856	0.478793	1.55498	-0.954185	0.315667	-1.28012	1.02542	0.000478923	-0.344244	-0.25537	-0.353843	0.854652	-0.230671	1.02239	-0.271199	0.734045	0.528908	-0.12372	-0.292219	1.36322	0.0745137	0.716049	-0.496824	0.0973405	1.79796	0.969675	-0.388162	0.0124422
3.44131	-0.189716	-1.33947	0.141128	0.46884	0.217532	0.578734	-0.54162	1.10936	0.547904	0.392581	0.727035	-1.28771	-0.732412	0.793005	-0.540772	0.245346	0.194994	0.0958335	1.38636	0.00299162	-0.126198	-0.231143	-0.225452	0.713755	0.540365	0.856575	0.0367453	-0.818242	0.929716	-0.166255	-0.843093	1.00482	0.505107	-0.0307615	-0.142495	-1.01228	0.674585	0.196204	-0.618006	0.201609	-0.135751	-0.309175	-0.330631	0.361307	-0.927163	-0.168448	1.08721	0.453665	0.476204
5.5587	0.0968886	1.28509	0.283868	0.298306	0.978325	-1.69118	-1.20704	1.23657	1.41946	-1.21701	1.49929	0.622286	0.961387	1.53205	-1.28134	-0.820375	-1.08733	-0.499246	0.126522	-0.589819	-0.12886	0.819937	-0.242495	1.39206	0.763236	-0.544693	1.58335	1.33851	0.0968766	-0.739639	0.296117	-0.370485	0.160402	0.385245	-0.411969	1.524	0.792548	1.14916	1.13136	-0.822384	-0.517089	-0.319242	-0.773091	0.860591	-0.564384	0.273855	-0.239109	0.0418663	0.148643
3.52687	-2.41678	1.56446	0.602356	0.325881	-0.445037	0.121689	-0.225387	1.55591	-0.945077	0.195375	0.432042	-1.68784	0.105524	-0.793	-0.974089	-1.58956	0.785134	1.3108	-0.061501	-0.859575	0.323513	-0.234096	0.94272	-0.336614	0.0876455	0.710509	-0.884527	0.562809	0.674568	-0.471562	0.69009	0.54169	-0.711938	-0.170017	0.228779	-0.752422	0.216182	0.520379	0.410371	0.248935	0.831859	-0.85076	0.147354	0.472197	-0.585614	-0.589074	-0.168862	0.277786	0.282515
1.84944	0.195362	-1.35324	0.510986	-0.174603	1.03872	-0.928926	-1.28201	-0.186736	-1.24784	1.38893	0.016821	1.82568	1.29246	-1.33274	0.520347	0.38549	0.794644	0.00780605	-0.670669	-0.759269	-0.749979	0.618521	-0.269383	-0.156383	-0.8696	0.541897	-0.478795	1.45717	0.213047	0.974994	-0.854378	-1.08126	-0.485837	0.87982	0.571491	-0.950714	-1.38974	0.304963	-0.362912	-0.490094	-0.877196	-0.199384	-0.194022	0.232585	-0.121989	-0.0406982	0.138357	0.538039	-0.622827
4.6098	-2.70456	0.592498	0.107501	-0.54989	1.15471	0.203606	1.12695	-0.158159	-1.60664	-0.906398	0.444657	-0.200171	0.345114	-0.541043	0.276472	1.06267	-0.132327	1.31302	-1.06852	0.18664	0.712537	0.871417	0.14716	-0.0912174	-0.768816	0.810327	-0.187681	-1.2903	-0.165438	0.111148	0.301859	0.0656176	-0.900324	0.582596	0.447455	-0.183064	-0.834826	0.114989	0.797434	-0.272716	0.205085	-0.155821	-0.0208161	-0.920852	-0.1102	0.277522	0.75074	0.20749	0.163243
11.7276	2.92851	-0.954794	0.0196884	-0.627472	-0.0167497	1.3196	0.421378	-1.81914	1.38814	1.05733	-0.0825035	0.952085	0.105734	-0.78881	0.61854	0.306962	0.887741	-0.00366384	-0.0473596	-0.809156	0.897366	-0.554256	-0.6133	0.165507	-0.187922	0.700116	0.573106	1.87045	-1.68612	-0.561099	0.0161662	0.564682	-0.000630042	-0.363311	0.221288	0.857482	-0.416652	-0.269648	0.285081	0.33164	-0.740472	0.661643	1.32597	0.0214618	-0.956267	-1.17226	-0.443404	-0.200277	-0.388011
1.77627	1.16708	-0.0233121	-0.222551	-1.09548	0.280661	-1.75352	0.798579	0.0191982	-0.0875865	-0.0563887	-1.31549	1.45838	0.73677	0.978512	1.16023	-0.105344	0.125415	1.83899	-0.429109	-0.331822	-0.793932	-0.32791	-1.25808	-0.161235	-0.747769	0.529035	0.941084	0.312798	-1.3836	0.801868	-1.2869	0.103876	1.41183	0.136804	-0.260158	-0.337189	-0.38488	-0.670958	0.262595	-0.450884	0.303622	0.315787	-0.345214	-0.451838	0.688557	-0.980781	0.502899	-0.0904075	-0.897372
9.92624	0.486273	-2.42954	-1.54301	-0.401547	-0.482922	-0.435429	-1.91332	0.0824085	0.461265	1.33435	0.801713	0.128167	1.15369	-0.51989	-1.03658	-0.345127	1.01209	0.179163	-0.246682	-0.813771	0.743259	-0.677002	0.521076	-0.667766	0.0174171	-0.287695	-0.774626	-0.629293	0.289612	0.157286	1.18042	0.574941	-0.478513	0.640743	0.675175	-1.70079	0.258421	-0.37675	-0.506826	0.363657	0.181139	-0.208274	0.229287	0.255287	0.699039	0.517381	-0.178013	0.279679	-0.513452
7.76992	4.10345	-1.01909	-0.0206233	-1.81572	-1.04687	-0.875017	0.761516	-0.352899	0.671225	-1.48497	0.0215568	-1.55385	0.00769911	0.677112	-1.14182	0.0670781	0.524916	0.274899	-0.581859	0.651714	-0.16417	0.390566	-0.0959734	0.789979	-0.562066	-0.967085	-0.145947	1.23408	0.647516	-0.479912	-0.423595	1.30833	0.4645	0.171577	-0.660227	-0.579308	-0.0707791	0.870583	0.760886	-1.07487	0.363749	-0.621483	0.786629	-0.254515	-0.931305	-0.503657	-0.395742	1.44628	-1.07343
6.11009	-1.97882	-1.38251	-0.081076	1.91702	1.09547	-0.211161	1.06405	-0.492753	0.0406256	-0.0723818	0.00995624	-0.14517	-0.297351	0.239965	-0.0658201	-0.777244	0.937394	-0.130777	0.0311916	0.60013	0.423848	1.32803	0.0595444	0.406832	0.550122	-0.558545	0.0418993	-0.777659	0.5452	0.154278	-1.28301	-1.40794	0.203826	-0.396606	0.199259	-1.33769	0.0172396	-1.00155	-0.103503	0.764559	0.595606	-0.0261308	-0.0892931	-0.0181076	-0.593776	0.309713	0.261432	1.33636	0.161132
10.8512	1.56105	-0.0335935	1.6759	-1.11689	-1.54002	-0.576462	-0.135442	-0.507344	1.86697	0.442463	-0.4515	0.578615	0.119897	0.966504	0.30154	0.564876	-0.178785	0.745003	-0.749999	0.981678	-1.04106	0.686219	-0.108457	-0.617737	-0.735191	-0.430165	0.550891	-0.416919	0.0512827	-0.158948	0.506088	0.296372	0.211924	-0.376993	-1.00365	0.320857	-0.0946419	0.285661	0.0178856	0.0688111	-0.869952	0.58804	-0.0293378	-0.96645	0.627858	-0.389874	0.656616	-0.417489	1.04521
5.45537	-2.31398	0.0142455	1.08906	1.43333	0.226869	0.3999	0.00801694	-0.711833	-0.837374	-0.38573	0.193096	-0.826758	0.0633267	0.648089	-0.0770858	0.32302	-0.0939774	-0.724435	-0.05895	-0.362314	-0.0397764	-0.865187	0.303375	0.524615	0.273591	-0.815477	0.0639991	-0.532492	0.78157	0.903004	-0.243247	0.942688	1.82274	0.631155	0.808874	0.444854	-0.17039	-0.0633047	0.96672	0.663637	0.374181	0.379783	-0.326569	-0.373917	-0.69712	-0.338167	0.992945	-0.234763	-0.379682
-0.955335	0.56078	-3.45546	1.71716	-0.954084	-0.37494	-0.157021	0.813791	0.971448	0.541578	1.32934	0.40619	-0.19129	-0.174777	-0.291607	0.340903	1.93513	-1.49433	0.0784638	0.524949	-1.38557	-0.356043	-0.377014	-0.0331938	0.726937	0.441426	0.281414	0.9061	-0.261423	-0.487489	0.48494	-1.26387	0.772442	0.183016	-0.889517	-0.27548	0.326775	-0.180343	-0.351187	0.172699	0.495335	-0.189159	-0.454818	-0.67412	-0.333805	-0.228334	-0.416799	-0.370028	0.260533	-0.157257
4.31946	-0.424101	0.169769	0.536414	-1.70867	-2.75478	0.230775	-1.01286	-1.51573	0.776895	-0.679873	-0.390031	-0.337593	-0.331449	-1.36268	-1.94825	0.624167	-0.527312	-0.695508	-0.768086	0.781911	0.49219	-0.302784	0.36783	0.656175	-0.629881	0.234611	-0.0216755	0.603145	0.749268	0.607467	0.684227	1.12312	0.873201	0.0679653	0.839547	-0.099252	-0.473013	-0.698719	0.0118111	0.659938	-0.269606	0.332218	-0.394127	-0.449521	0.381343	-0.105939	1.43048	0.11789	-0.000837293
-4.21215	-0.953305	-2.89901	0.243944	-0.506831	2.17666	-0.794867	1.82978	-0.483724	1.74543	-0.162713	0.327653	0.370798	-1.45407	0.38968	-0.806931	-0.34893	-1.44734	-0.659966	-0.189305	-0.788672	0.742805	0.490225	-1.26415	0.0629127	0.505773	-0.31019	-0.341243	-0.203857	0.577613	0.856848	0.47248	0.609947	-0.915191	-0.344475	0.34304	0.0158658	0.131036	0.933431	0.316169	0.362917	-0.477389	0.488944	-0.304746	-0.633768	-0.0240207	0.674242	-0.496383	-1.25046	-0.173817
1.93349	-1.69389	-1.2723	1.10771	1.69085	-0.370246	0.63078	-0.119907	1.33393	1.22299	-0.605627	0.698796	-0.133265	0.0986095	0.473189	1.49885	0.213641	1.06879	0.526451	-0.115407	-1.46584	0.529115	0.0668164	-0.768436	-0.99842	0.0513768	0.194599	-0.40658	0.173747	0.983552	-0.711604	-1.02167	-0.00212142	-0.168504	0.111558	0.326445	0.272098	0.166405	0.383306	0.332396	0.442256	-0.480911	0.0800701	-0.223929	0.329848	0.392256	-0.14455	-1.18664	-0.322235	0.114909
6.8444	-1.71299	0.492728	0.197408	-0.459015	-1.71652	0.756375	1.02027	1.40004	0.283426	0.693903	1.07748	1.63843	1.22376	-0.292988	-0.28112	0.497894	-0.931243	-0.586409	-0.582117	-0.929413	-0.254792	1.51512	0.00993072	-0.645106	0.19219	0.322426	-0.0721142	0.389545	0.333182	-0.706063	-0.730751	-0.570649	-0.559126	0.456232	-0.247826	0.793708	0.0199049	0.576989	-0.541634	0.793566	0.167694	0.106151	-1.13965	0.151962	-0.073635	-0.649172	-0.280344	0.317236	-0.079161
11.9644	0.804931	-0.784841	1.22714	0.995774	0.718853	-1.60169	-0.633933	0.547477	0.906577	0.745351	0.171842	-0.967475	0.236293	1.08196	0.268804	-0.115276	-0.826939	-0.196228	0.706482	-0.338339	0.209919	0.198855	-0.0288015	0.0129921	-0.632683	-0.548564	-0.5103	-0.299937	0.44181	-0.135237	0.703337	0.763683	0.0168355	0.379629	-0.368165	-0.256464	0.820527	-0.137209	0.151746	0.6697	-0.343836	-0.517759	0.280589	-0.183103	-0.403788	-0.514659	0.958689	0.748413	0.505363
7.32718	0.261603	0.0824601	0.329014	0.841131	-0.973501	-0.237585	-0.399251	0.884655	1.22504	0.667043	-0.967039	1.0992	0.115607	0.519736	0.180788	0.611057	-0.128472	-0.0523434	0.418707	0.707678	0.290242	-1.23419	-1.10289	0.717859	0.618117	0.668147	0.589729	1.02746	0.706633	-0.123987	-0.413243	0.593744	0.399186	0.348643	0.197381	-0.2147	-0.0456544	0.00974657	0.174747	-0.563357	-0.0937756	-0.216334	-0.106634	0.160473	0.290392	0.3867	0.98274	-0.16451	0.465966
4.95424	0.741851	0.173193	-0.36045	1.63076	0.0848935	-0.726025	-1.1872	0.612266	-0.339479	-0.246991	1.4593	-0.67588	-0.655963	1.96193	-2.10367	0.168049	1.1588	-1.1432	-0.652891	0.443565	0.306591	0.829425	1.02659	-0.279235	-0.206033	-0.0314377	-0.0406135	0.292916	-0.138545	-0.294971	0.518015	0.156584	-0.460907	0.0058199	-0.407802	0.455181	-0.494201	0.238695	-0.843612	0.4116	0.413875	0.701709	1.30053	0.591726	0.361118	-0.00472785	0.0999916	-0.171524	0.460499
6.02517	1.7906	-1.85618	-1.06366	3.823	-0.0966338	-0.211838	-2.19512	-1.42281	-0.451131	-2.15527	-1.18753	-0.90609	-0.484054	-0.650875	0.0417979	-1.13452	1.6845	0.0476632	0.324345	-0.454787	-0.374097	0.775153	0.187024	0.532106	-1.15979	-0.611153	0.19653	0.71771	-1.36085	0.139869	-0.0413325	0.472512	0.506322	0.938704	0.18516	0.179277	1.11147	0.844248	-0.0619393	-0.572907	0.76137	-0.327019	0.95354	0.235016	-0.446452	0.327411	0.188925	-0.696376	0.676262
8.69229	1.83042	-2.16856	-0.912868	-2.09675	1.00986	-0.0555307	0.0862848	-0.0723605	-1.50777	-0.335929	-0.53605	-1.45415	-0.767193	-0.681265	-1.15447	-0.934256	-0.106469	-0.453113	-0.93369	-1.28394	-0.829757	0.547121	-0.473753	0.1356	-1.04786	-0.170444	-0.194213	0.148901	0.547766	-0.751702	-0.6376	-0.912707	0.0709085	1.037	-0.720509	0.616561	-0.558196	-0.836736	-0.492592	-0.451094	0.17143	0.905668	0.798106	0.101228	0.162848	0.997723	0.215801	-0.208952	-0.658014
13.9611	1.06645	-1.22288	1.28867	0.148009	0.695995	0.999253	-0.229638	-1.57901	-0.260704	-0.734092	0.849056	0.359534	-1.58014	-1.19376	-0.598976	-0.741449	-0.196915	1.28159	-1.16569	0.213277	-0.0916978	-0.14496	1.46045	-0.230125	0.97346	-0.320388	0.606605	0.300626	0.947095	1.77277	0.510906	-0.604308	0.703943	1.68225	0.534236	-0.198999	-0.138271	-0.365412	0.280918	-0.90821	0.193353	-0.311586	0.253204	0.0729548	-0.212637	0.177175	-0.16929	-0.338161	0.0434655
3.48132	0.0726362	-2.1358	1.08701	0.621163	-0.471013	0.634792	-0.872743	-1.5644	-0.147799	-1.17689	-0.848311	0.456644	0.349032	0.481862	1.09691	0.43021	-0.0168646	0.135055	0.715557	-0.781335	-0.0132133	-0.0272773	-1.37743	-0.193613	-0.161511	1.24581	0.876162	0.287487	0.907452	0.417992	0.419558	0.447203	-0.316688	-0.45441	-0.195765	0.751891	0.484596	-0.464822	0.135392	0.321188	0.980607	0.326214	-0.844382	-0.162228	0.203468	0.187903	0.786332	0.130069	-0.177978
5.21978	-1.03456	0.278267	-0.125485	-0.271515	-0.0241309	0.78034	0.233271	1.1666	-0.261689	-0.668581	-0.0811497	-0.71466	0.78371	-0.122157	-1.86215	-1.16112	-0.812127	0.0969279	0.50758	0.14386	-0.206794	0.104659	-0.400888	-0.262157	-0.340178	1.98997	0.778017	0.352811	0.328519	-0.520668	-0.360571	-0.525165	-0.201727	-1.03205	-0.591015	0.707135	-0.959043	0.105964	-0.68806	1.01946	-0.321203	-0.0538685	-0.020105	-0.133472	-0.132823	-0.658944	0.559242	0.350631	0.409067
1.41088	0.730044	2.60011	-0.546096	-1.29293	0.544111	-0.32521	-0.593051	-0.207867	1.2412	-0.076045	0.372006	0.418244	-1.85232	-0.0546898	0.0325499	-1.31063	0.7284	-0.0104896	0.651807	-0.527119	0.853284	-1.13972	-0.565018	-0.505479	0.156917	-0.886329	-1.00562	0.640527	-0.737667	1.76677	-0.536974	0.169597	-1.42442	-0.76996	-0.502649	0.213749	-1.05766	-0.953032	-1.0559	-0.228719	-0.0854222	-0.0482852	0.655473	0.685699	0.409124	0.119153	-0.717614	-0.903526	0.857463
4.2518	1.97981	-0.750533	0.989591	0.587152	-0.0133722	-0.512036	0.146327	1.16744	0.0114223	-0.734889	0.0936368	-1.66119	-1.04407	0.133759	-0.992216	-0.00133897	-0.113282	-0.24676	-1.9832	-0.658185	0.267808	-0.830644	0.908545	0.539804	-0.0229358	-0.431928	-0.418842	0.301793	1.13303	0.0970434	0.0674757	-0.864779	0.192495	0.338436	0.579089	-0.0114397	0.70806	0.412726	-0.188024	0.13273	-0.201759	-0.0977823	0.23916	0.266988	0.508128	0.249675	-0.196946	-0.287837	-0.125479
4.18081	0.588346	0.883168	-0.0245611	-0.708582	1.01999	-1.03382	-0.36563	0.0707153	0.403085	0.925677	0.0149662	-0.0520141	-0.124844	-0.598354	-0.18841	-0.329936	0.727307	0.917665	-0.267208	0.377466	0.540796	-0.763856	-0.242439	-0.345659	0.766685	0.299606	-0.234426	-0.272609	0.730198	-1.2089	-0.108668	0.00695677	-0.852494	0.255395	0.557911	-0.405981	-1.22784	0.0715087	0.00917734	-0.492432	-0.613964	0.120183	-0.22353	0.365103	-0.0411985	0.558385	-0.198232	0.771718	0.293298
-0.577588	1.9917	-1.41398	-0.401677	0.945191	0.854534	-0.155284	-1.2153	0.884705	1.54542	-0.416352	-0.73266	0.710421	0.588372	0.575083	0.597641	1.30336	0.309074	0.228997	-0.687516	0.44134	-0.172616	-1.23977	0.713653	-0.790889	0.256273	1.03179	-0.224933	-0.17936	-0.588898	-0.680389	0.187037	-1.19725	-0.507805	0.257144	0.30848	-1.62413	-1.4932	-0.626155	0.241036	0.14651	-0.181592	-0.0276469	-0.931177	-0.316238	0.529167	-0.205128	0.372034	0.0617292	-0.131789
11.2263	2.62837	-1.28957	0.57385	0.0325038	0.57983	-0.0489286	-1.55978	0.818847	0.184103	0.155016	-0.0434731	0.606678	-0.565407	1.24149	-0.93242	-0.208571	-0.488394	0.295668	-1.89433	-0.221383	1.16682	-0.78124	-0.484339	1.02683	-1.10686	0.436722	-0.508277	-0.394369	0.196799	0.79589	-0.195543	-0.987069	-0.538716	-0.38099	0.175383	0.850309	0.491882	0.285439	0.357055	0.109078	-1.35918	-0.51429	0.349633	0.468976	0.288064	0.417561	0.316198	0.362178	0.41393
-3.9439	2.28153	-3.21388	-0.363431	-0.324978	0.391263	-0.284725	-0.467116	0.378393	0.375871	-0.583089	-1.70253	0.798522	-0.230006	1.55934	0.985941	-0.359044	0.772235	0.539998	0.163843	0.620712	0.321105	0.192378	-0.469997	1.06569	-0.247753	-0.257418	-0.875441	0.135992	-0.937882	-1.4472	0.0162118	-0.318485	-0.765106	-0.0800182	-0.0653526	-0.821648	-0.552262	1.2131	-0.863473	-0.0120223	0.230874	-0.40434	-0.411251	-0.592452	-0.683735	-0.286752	-0.361922	-0.688624	0.280806
10.2335	0.159813	0.522874	0.173362	-1.8033	0.767971	-0.026773	-0.800606	-1.06788	-1.12167	0.205327	-1.36718	-0.743658	0.67179	-0.229624	0.519125	-1.69894	1.0139	0.321541	-0.57819	0.785812	-0.402716	-0.626073	-0.551053	-0.250685	-0.434416	-0.864769	-1.26425	1.40709	-1.21937	-0.0174733	-0.132283	1.32041	-0.914292	-0.189037	0.332291	1.29138	0.810625	-0.121566	0.046557	-0.779564	-0.589471	-0.49897	-0.177981	-0.358846	-0.621275	0.3964	0.272184	-0.259392	-0.996597
20.5285	2.28072	-1.97384	-0.884948	-0.538546	-2.76042	1.88003	-0.176683	-1.42485	0.506305	1.4596	-1.48888	0.124811	0.13138	-0.385362	0.179329	-1.08002	0.28102	0.244628	0.348631	-1.45477	-0.177173	0.273681	0.532738	-0.0794134	-0.394879	-0.099919	-1.97238	-0.251677	-1.3188	-0.78295	0.316262	0.129351	-0.185484	-0.11404	-0.718612	0.178193	-0.250663	-0.888289	0.151035	-0.334332	0.495274	0.164659	0.20057	-0.267043	0.342336	0.046769	0.541531	-1.49815	0.404139
3.95757	-0.726435	-0.434705	1.00455	-2.33106	-0.931099	0.240873	-0.87707	-0.161964	1.76757	-0.662973	0.425697	0.705176	-0.174884	1.90069	-0.479232	-0.0510943	-0.506016	0.0828621	-0.113208	-0.257501	0.0770732	-1.27757	-0.0325202	-0.996277	-0.646356	0.245065	-0.777935	-0.842103	-0.590537	0.554406	-0.302381	-1.00875	0.229791	-0.355561	-1.40116	0.299676	1.35743	-1.02189	-0.493415	-0.278856	0.125125	0.677208	-0.0264139	-0.388682	-0.757784	-0.439154	-0.832176	-0.140497	1.25211
7.31393	0.46731	1.25328	1.47915	1.47872	-1.45059	-1.10494	1.67039	2.6748	-0.174051	0.60624	0.0718476	-2.01015	0.211863	-0.605676	1.33841	-0.015284	-2.19093	1.14564	0.664879	0.27015	0.435568	-0.757538	0.65193	0.154495	0.844775	0.00990919	-0.397452	-1.23363	-0.106766	-0.207781	-0.0432223	0.589424	0.276723	-0.544315	0.828459	-0.642946	-0.593508	-0.51128	-0.696483	-0.290022	0.828947	0.188142	-0.191579	-0.296754	-0.179663	0.017211	0.854169	0.0716291	-0.555568
5.92075	-0.50068	-1.86594	-0.920726	-1.65389	1.04574	0.157239	0.252109	-0.542491	0.279229	-0.16591	-0.415995	-0.130685	-0.504362	-0.703567	-0.431559	-1.11681	-1.24587	-1.41618	-1.08701	-0.77056	0.346068	0.290151	0.920269	-0.454845	0.126231	0.805772	1.70147	0.633312	-0.0887768	0.242242	0.184698	0.671094	1.32964	-0.877522	-0.711199	-0.805591	0.312508	-0.401318	1.60159	0.017588	0.205155	0.421908	0.0862916	1.61678	0.231559	-0.555644	0.135972	0.905136	-0.489071
8.96895	1.35184	-1.17007	-0.224536	-0.61817	3.39828	-0.73592	-0.653415	1.58611	0.0163925	0.298075	-1.0643	0.0684871	0.126266	-1.30628	0.315757	-1.2953	1.0326	-0.192925	-0.912572	-1.59344	-0.279944	-0.549424	0.259493	0.242315	0.314089	1.04327	1.79986	-0.197274	0.0712102	0.432446	0.359284	0.577629	0.0290939	-0.00905085	-0.606795	1.11257	-1.03676	-0.629072	-0.885492	-0.125539	0.649373	-0.66178	0.442383	0.103777	-1.1694	1.00229	-0.260788	0.431943	-0.169205
4.13224	-2.1956	-0.303085	-0.795296	-2.2635	-0.7714	-0.00672182	0.272653	0.441246	0.122041	-0.316255	1.16992	0.296647	-0.121234	-0.127799	-0.705324	0.375345	0.559418	0.385157	-0.0355394	0.852542	-1.47259	0.583251	-0.989332	0.791974	0.422834	0.555749	0.259332	1.35873	0.0440379	-1.06108	0.169708	-0.289236	-0.474483	1.00727	-0.233369	-0.0294575	0.236146	0.162995	-0.215939	0.307848	0.666898	-0.534545	-0.122493	0.424895	-1.45937	-0.282411	0.321577	-0.350069	-1.04194
1.16276	-0.0261636	-0.709636	1.03092	-0.185565	0.67546	1.1357	-0.58335	-0.146448	-0.482952	-0.399049	1.07079	0.670141	0.333744	0.318415	1.17925	0.683392	-0.078788	0.21331	-0.0104833	-1.53791	0.0103733	0.421496	0.84533	-0.287417	0.423068	0.257375	-0.371712	0.0180249	-0.52779	-0.450765	-0.925877	-0.271856	-0.13999	0.957002	-0.00255188	-0.0989623	0.110099	0.0465138	-0.394295	-0.943057	0.0237092	0.655231	0.0354435	0.00669889	-0.55139	-0.648834	-0.155923	-0.418541	0.134543
7.87673	-0.224824	-1.30784	1.09853	0.885326	0.84281	-0.360544	-2.32707	0.632502	0.151101	-0.0963657	0.24442	-0.553181	-1.02877	-0.00472465	-1.97958	1.33211	-0.27679	0.541399	0.293442	0.150737	0.273915	-0.275754	0.391109	-0.729526	-0.159184	-0.48716	-0.31047	-0.550359	-0.568933	-0.702325	-0.869037	-0.74208	0.966446	-0.812779	-0.450421	-0.342766	0.6269	-0.479552	-0.0934969	-0.689412	-0.0941725	0.0679477	-0.396527	0.318502	-0.0763696	0.581831	-0.128932	-0.184452	-0.650702
0.388603	0.672918	1.6345	2.02828	-1.11829	0.37351	0.0156021	0.780743	-0.843901	0.885326	-0.283421	0.195077	-0.102118	-0.221273	0.891561	-0.99337	0.967986	-0.533819	-0.664292	0.908444	-0.29193	0.524854	-0.485678	0.441059	1.02239	-0.366524	-0.194572	0.342704	-0.768448	-0.242934	0.390376	-0.850361	0.0849204	1.35802	-1.59783	-0.876094	-0.0955278	-0.123551	0.602588	-0.452221	-1.27624	0.389882	0.846661	0.0291097	0.476999	0.42374	-0.392986	-0.571998	0.294405	0.576547
5.63581	2.62643	-2.31831	0.0703028	-0.558312	0.416155	-0.849204	-0.562247	-0.504015	1.73924	-1.43274	1.79672	-1.17855	0.37728	0.129733	1.51481	-0.583184	0.499506	-0.29805	1.49422	-1.06925	-1.08523	0.0240946	-0.463344	-0.206469	0.120052	-0.416748	0.915313	0.00580156	-0.632275	0.373884	0.382693	-0.534923	-0.309387	0.622156	0.186417	0.824081	0.567948	-0.061278	-0.220144	-1.368	-0.0534647	-0.593813	0.392034	-0.203446	0.166841	-0.0932154	0.334221	-0.788196	1.07411
4.63842	-0.430685	-3.75923	0.154499	1.44437	-0.385264	-0.953884	-1.58771	1.06376	0.657368	-1.00198	-0.787599	0.114014	0.199935	1.10506	0.70051	0.335583	-0.848374	0.148956	-0.50609	-0.431971	0.135078	-1.03538	-0.709376	-0.665949	0.535215	0.645502	0.107338	0.0857933	0.0938329	-0.764778	0.00766996	-0.501382	-0.26566	-0.815708	-0.370973	-0.447984	0.266006	0.36767	1.43209	-0.382832	0.136785	0.0499624	-1.38414	0.45736	-0.69236	0.491564	0.144703	-0.51208	-0.329961
5.26377	2.06845	-0.363393	-0.686445	-0.582302	1.30721	-1.12248	0.891521	1.50738	-1.15293	0.568277	0.937147	0.508658	1.71065	-0.222454	1.0252	-0.444885	1.03746	1.83865	-0.329177	0.764089	1.36913	1.37555	-0.611895	-0.786753	-0.516927	-1.05574	0.416592	-0.0661863	0.572165	-0.275124	-0.278959	-0.171355	0.739952	-0.437745	1.84943	0.112147	-0.426191	-0.793702	-0.364399	1.3267	0.164074	0.390317	0.586171	-0.0983271	0.382508	0.964786	0.183417	0.0422233	0.648933
8.499	-2.06529	1.54686	-1.27704	0.656102	-0.0655493	-0.88377	0.528267	-0.489254	0.653084	-0.364655	0.506852	1.77573	-0.23032	-0.680733	-0.0888522	-1.08407	-0.288541	0.440278	0.601425	-0.515929	-0.274561	0.0797611	-0.0492506	-0.732996	-0.633941	0.60079	-0.438534	0.212896	-0.625932	0.354038	-0.472217	0.919919	1.02605	-0.647307	0.434948	-0.583573	0.201964	0.443723	0.292156	0.767997	-0.303237	-0.493576	0.660267	0.903382	0.40396	-0.62764	-0.098852	0.171342	-0.12843
2.91394	-0.6101	-0.130925	0.537137	0.815667	-0.681409	-1.28823	-0.666206	-1.60944	0.268756	-0.950861	0.0708508	-0.859021	1.1041	-0.597016	-0.0704123	0.687784	0.0492551	0.299626	0.927813	-1.01087	0.349535	0.545426	-0.438562	-1.73386	-0.91866	0.481561	0.250108	-1.06514	-1.13933	0.725805	-0.119367	-0.0540138	-1.15003	0.100945	-0.122004	0.455688	-1.00296	-0.198576	0.298188	-0.318343	0.522595	-1.03985	-0.0627351	-0.333574	0.832807	-0.212185	0.00197354	-0.461392	-1.20128
0.379854	-0.766554	-2.08087	1.34832	0.967705	0.132913	0.912584	-0.0390065	1.52215	1.59834	0.419173	-0.283193	0.639839	0.69865	-0.748807	-0.238766	-0.0760341	1.07975	-0.656958	-0.590858	0.54288	0.294788	1.00958	-0.178622	-0.255142	1.18949	-0.71437	-0.854889	0.651722	-0.249061	0.0343007	-0.621695	0.876315	-0.228625	-0.761781	0.0781978	0.133258	-0.530466	-0.472278	-0.323242	-0.734405	0.269858	-0.0376852	0.429592	0.292364	-0.091273	0.825092	-0.399325	0.191913	0.720879
11.8829	0.0779912	2.15341	2.25802	-0.409684	-0.499345	0.493292	-1.0879	0.0995065	-1.4631	1.15537	0.650797	0.457632	0.303052	-0.546113	-0.844766	-0.309559	0.914745	0.548089	0.653183	-0.479589	0.649579	-0.633011	1.21043	-0.691143	0.0992352	-0.510268	1.06393	-0.258886	1.47743	0.922164	1.36229	0.749176	0.0942785	-0.0673305	-0.0987655	0.517259	-0.122969	0.838975	0.3045	0.866981	-0.583393	-0.0168918	0.677636	0.589256	-0.366152	-0.278802	0.547608	-0.892862	-0.0028487
8.12106	-0.218586	1.24897	0.14358	1.17609	1.38228	-0.268753	-0.667044	-1.12805	-0.936995	1.02238	0.796175	0.0401108	-0.381749	1.76108	-0.982854	0.59282	-0.0809557	-1.48339	0.0843629	-0.00490434	0.1502	0.411659	-0.421719	-0.523007	0.613708	-0.54118	0.0796514	-1.64089	-0.0779761	-0.53695	-0.839745	-0.719893	-0.228831	0.849309	-0.180251	-0.291114	-0.433123	0.411685	-0.0387913	-1.21073	0.695295	-0.285363	-1.17033	0.463529	0.150671	-0.843028	0.0649456	0.302818	0.140819
14.0034	-0.139549	0.365333	-0.349132	0.706147	0.293124	-0.369545	-2.04468	-0.43548	-0.573733	1.21478	0.969309	-0.297207	0.468314	0.912563	-0.0809842	0.636706	-0.870489	-0.0632409	0.589268	0.28159	-0.0101758	-1.41583	-0.680126	0.805383	0.328506	0.713095	-0.406113	-0.245985	-0.687711	0.854927	0.33563	0.0161229	0.179732	0.128328	0.36224	0.555112	-0.467322	0.618307	0.419303	-0.0819355	0.850355	0.204224	-0.184088	-0.262046	0.61862	-0.575714	-0.590837	0.143972	-0.206926
3.42495	0.223804	-1.07957	1.70768	0.0593764	0.385496	1.55946	0.125033	-1.90174	-0.0139917	0.77534	1.7022	0.428639	0.139641	-0.348092	-0.610003	0.141809	-0.205843	-1.08304	1.28321	-0.0927722	0.994486	-0.463151	-0.560828	1.01729	-0.183747	-0.0390985	1.27964	-0.0572542	0.257344	0.456706	-0.300028	0.127663	0.749329	0.690806	-0.744782	-0.673674	0.159774	0.184113	-0.581128	-0.0937593	-0.685015	-0.371195	0.0042852	0.357547	0.521495	0.338756	0.613919	0.742496	-0.502474
4.63246	-0.426343	0.872855	1.0063	0.219978	-1.28432	-1.47876	-0.175022	0.560089	-0.640609	0.263649	-0.377727	-0.39806	-0.411144	0.979041	-1.0509	0.635566	-0.685464	0.317597	-0.160355	1.08822	0.558303	0.510824	0.249934	-0.218731	0.729297	0.0540696	0.0155444	0.614644	-0.0821913	0.0132726	-0.141351	0.196386	0.324844	0.28396	-0.521337	0.131332	0.488424	0.0358674	-0.639581	0.232456	-1.00545	-0.0916537	0.109754	0.202229	0.219793	0.798327	0.605287	0.0124453	-0.164231
3.5167	1.17204	0.766974	0.880163	-1.05112	1.60308	-1.19834	-2.01994	-0.933033	-0.17403	0.609044	-0.117606	-0.198106	-0.443643	0.533143	-0.303865	0.0198547	0.215119	0.271078	0.0985635	0.54476	-0.0468649	-0.36715	1.50314	1.49677	-0.761874	0.473087	-0.727471	0.0240421	-0.214606	0.478496	0.11828	-0.168144	-0.935808	-1.09681	0.141219	0.0799649	-0.60573	0.0207822	-0.399878	0.177718	0.356399	0.314566	-0.0730726	0.0721075	0.35534	-0.13867	-0.113388	0.0806722	-0.0317056
4.88455	-0.199569	0.78524	1.85602	-0.317648	-0.424306	0.997959	-0.320314	0.471619	1.00727	1.55427	0.0915981	0.0770242	0.384759	-0.159653	-0.468195	-0.684675	-0.162227	1.08534	0.37751	-1.50794	-0.648403	0.0942841	-0.204157	0.228982	0.239134	0.137982	-0.976864	0.309592	0.411256	0.0610349	-0.534415	0.9803	0.0343022	-0.454583	0.0488743	-0.145365	-0.202446	0.808858	-0.539969	0.373374	0.737357	-0.261566	-0.440494	-0.43294	-0.782277	0.46137	-0.693887	0.281974	-0.465142
13.9918	1.33494	-2.31332	0.239039	1.99703	-0.825089	-1.06271	-0.878351	-0.593083	0.366937	-1.21755	0.694726	0.834489	-0.481412	-1.24461	-0.457849	0.807905	0.659582	1.00445	1.35461	0.0913636	1.28531	-1.49993	0.0765558	-0.0141591	0.0715896	0.103867	-0.351985	0.0896565	0.952146	0.0538793	-0.598768	0.871001	-1.51312	0.179664	-1.11638	0.399414	0.0163934	1.47026	0.730079	0.511263	0.68877	-0.214397	0.00407955	-1.61366	-0.0227362	0.899776	-0.0538906	0.174239	0.20039
1.756	-0.994536	0.0689253	0.309966	-0.35897	-0.640411	-0.261023	-0.156969	-0.891261	0.64624	1.22784	-1.40483	-0.675793	0.594946	-0.592104	0.368635	0.25089	-0.789032	0.0438643	0.608883	1.08577	0.831085	-1.01747	-0.792565	0.71083	-0.382538	0.927342	-0.11152	0.101587	-0.652138	-0.604973	1.77619	0.0114211	0.288037	-0.696737	0.34421	0.270262	0.031161	0.018125	0.616784	-0.123892	0.0359641	0.331245	-0.140084	0.738222	-1.0254	-0.389013	0.560258	-0.277682	-0.083309
12.3446	-0.19045	0.572057	-1.09087	-0.674232	-0.60544	-0.0510902	0.139122	1.15224	0.311692	0.205245	-0.619664	1.34485	-0.24272	-1.47065	1.39845	0.994484	-0.426585	-0.900325	-0.730057	0.445381	-0.478399	-0.337159	-2.00805	-0.159612	-0.0370012	0.285877	-0.278547	0.87506	-0.959138	0.0631221	0.198934	-0.530455	0.0180499	-0.728572	0.668266	0.18708	-1.14295	-0.23467	-0.76921	0.700722	0.251906	0.107664	-0.136077	-0.120255	-0.118591	-0.0165503	1.2307	0.424055	0.493025
7.114	1.5228	-0.284332	0.407946	1.32843	1.1274	-0.340332	-0.945691	-1.10054	-0.22177	-0.887607	1.32922	-1.83158	0.636819	0.767825	-0.61381	-0.402931	0.476402	-1.19567	0.966472	0.0484004	1.32677	0.229469	-0.61488	0.337399	-0.626376	-0.42671	-1.06259	0.028522	-0.301342	0.878363	0.0318732	-0.499356	-0.223334	0.247288	-0.711985	0.669595	0.25971	0.485215	0.846978	-0.230341	0.722168	-0.38059	1.41401	-0.129596	0.170945	-0.59285	1.08892	-0.264987	-0.328104
9.99959	-0.636641	-0.53618	-3.0165	0.083759	-0.661573	0.529475	-0.832549	1.02691	-0.875566	1.87506	2.70734	-1.76262	0.661853	-1.0897	1.52527	-1.52441	-1.90327	-1.43407	0.574733	0.592332	-0.274775	0.882538	-1.11473	-1.19068	1.21008	0.0196926	0.166337	1.68607	-0.438024	0.871771	0.41056	-0.223783	-0.0880077	-0.738752	0.446646	-0.642151	0.063612	0.774376	0.935547	0.332752	-0.212953	-0.0340203	-0.384822	-0.550535	-0.507609	-0.190848	0.286277	-0.00362232	-0.0104437
8.20609	-1.15015	-0.0738605	0.072869	1.32632	-1.2086	-0.232798	0.220564	-0.589461	-2.20874	0.440474	-0.68211	-0.187598	-0.637418	0.144212	0.107977	0.729739	-1.0614	0.831407	-1.55206	1.17231	-0.186427	1.08083	0.652003	0.464811	0.426423	-0.233609	0.978635	-0.0396426	-0.941534	0.359485	0.298057	0.131365	-1.54069	-0.258329	-0.353471	0.479661	-0.136164	-0.410832	0.555939	-0.329368	0.237383	-0.475034	-0.245227	0.382213	0.375134	0.692713	-0.121911	-0.575211	0.187934
11.3758	1.46978	-0.43926	-1.57424	-1.07664	-2.3641	-0.484106	-0.0460427	0.230345	1.25501	-0.752023	1.90015	1.10843	0.756375	-1.1874	1.12859	-2.11629	-1.63278	-0.917224	-1.07944	0.661235	1.81938	-0.349304	0.361764	0.452188	0.156158	0.794192	-0.86314	-0.488326	0.615066	-2.57411	0.121222	-1.89253	0.808255	-0.0919047	0.315541	1.15576	0.193522	0.00374554	0.432786	0.518173	-0.373982	-0.578417	1.2516	-0.142299	-0.677101	-0.725324	1.29945	-0.0172392	0.58251
-3.07161	-2.32496	-0.243792	2.23227	-0.426288	0.14452	0.261035	0.304028	-1.63156	-0.514502	-1.34543	0.201216	-0.060604	-1.34845	-0.305211	-1.51755	-0.685306	0.383902	-0.302516	0.347381	-0.459338	-0.108902	-0.419447	-0.192393	-0.0830482	-0.404336	0.295529	-0.214099	-0.946393	-0.311606	-1.36697	-0.056334	0.518582	0.232347	0.0272355	-0.282929	0.837048	1.07814	-0.541365	0.0540009	-0.296001	-0.0299472	-0.401162	-0.0725412	-0.28908	0.323993	0.616164	-0.0692234	-0.172942	0.319103
7.99621	-1.19639	0.437121	0.880559	-1.59882	-0.365716	0.535216	1.10763	-0.0355637	-1.23651	0.425932	0.074989	0.543815	-0.2734	-1.31152	0.364219	0.256668	-0.548248	0.168109	-0.0595035	0.654686	0.476011	0.0304229	-1.72239	1.38753	0.460755	-1.34517	-0.330222	-0.664033	-0.52542	0.863708	-0.212798	-0.484567	-1.24559	-1.1424	-0.715932	0.22654	-0.967877	0.984629	1.01581	-0.282755	-0.11342	-0.778105	0.680861	-0.316649	-0.246618	-1.21425	0.0523372	-1.05308	-0.13217
1.37066	-0.431253	-0.146864	1.78381	0.112107	0.450242	-1.27847	1.16607	-0.330874	-0.0103566	0.549499	-0.0351287	0.058949	0.0507343	2.01298	-1.63889	1.05526	0.740695	1.20933	0.651766	-0.0495937	-0.170929	0.330369	1.00693	0.0434903	0.30688	-0.262562	0.673692	-0.650532	-0.26859	0.998386	-0.170698	-0.829213	-0.168564	0.0939409	0.0438816	0.136527	-0.165555	0.138513	0.802508	-0.15115	-0.32343	0.0638815	-0.829381	0.940658	-0.117934	-0.357862	-0.498571	0.0167178	-0.801346
4.12478	0.048565	-0.64136	0.195473	-0.315496	0.101754	-0.374626	1.65298	-1.30127	0.197801	-1.20384	-1.03283	0.311601	-0.352297	0.889732	-0.246479	0.615961	0.592221	0.395649	0.675178	-0.693539	-0.791054	-0.705481	0.673942	0.567816	0.262565	0.897092	0.0963118	0.411285	0.0658969	-0.28879	-0.206741	-0.367638	-0.425335	-0.816603	0.324039	0.119801	-0.409924	-0.234806	0.355526	1.15189	0.531692	0.771155	0.473097	0.412836	-0.219602	0.104617	-0.435715	-0.0232493	0.525706
1.82797	-1.69705	-0.922462	-0.183273	-1.20899	0.794921	-1.16266	0.705295	0.306243	1.23136	-1.36358	0.617158	-0.0607954	1.06701	0.3934	-1.36015	-0.171702	-1.12564	-0.185061	-0.378378	0.22816	-0.0156283	-1.26186	0.461573	0.760569	0.145183	-0.0469581	-0.803217	-0.661168	-0.521402	0.796396	-0.524779	-0.9997	-0.4091	-0.30393	-0.107485	0.856209	0.241907	-0.602059	-0.997293	-0.0792572	-0.81612	0.810659	0.64766	0.581947	-0.504083	-0.335476	0.382853	0.703236	0.0772419
7.44483	-0.0856615	0.560244	1.5933	0.836579	-0.954439	-0.916976	2.16785	0.389296	-0.0405969	-0.77827	0.121086	0.981799	-0.00901748	-0.499493	-0.0872084	0.94134	0.195199	-1.72637	-0.020304	-0.501342	-0.654412	-0.202964	-0.511379	0.230528	0.0989667	0.831446	-0.473192	0.376476	-0.603449	0.83205	-0.927664	-0.837828	0.27463	0.204915	0.661398	-0.416583	0.607172	-0.468932	0.823834	-0.112744	-0.465055	-0.253691	-0.27687	-0.661008	-0.0849549	0.404507	-0.326134	-0.904885	-0.350267
2.30038	-1.42755	0.0988332	-0.800321	1.74336	0.858747	-0.645923	-0.0839246	-1.07503	-0.370245	-1.72168	0.822844	-2.0701	-1.19883	0.210159	-1.19181	0.327498	0.815464	1.08842	0.976088	0.606264	0.642564	0.588019	0.136151	-1.38593	-0.0739445	-0.850157	1.95623	0.791849	0.754245	-0.136451	0.481228	-0.314153	0.325574	-0.355283	0.529093	0.839033	-0.980338	-1.08833	0.219775	-0.150727	-0.79133	-0.463425	0.563404	-1.05084	0.178234	-0.643205	-0.572299	-0.657546	-0.687345
3.51141	2.33759	0.288638	0.400032	-0.385715	0.129422	-1.91579	0.564175	0.661224	2.44961	-0.294684	1.24765	-0.173051	-0.253785	1.11701	-0.824901	0.00080984	-0.869804	0.292219	-0.0550654	1.19192	-0.8942	0.132684	0.749234	-0.261793	-1.83982	0.396772	-0.0259624	-0.990967	-1.12206	-0.820748	-0.518759	0.629304	0.564678	-0.257152	0.0122766	-0.147995	0.966495	0.07768	0.296566	0.0019437	-0.741146	-0.881666	-0.145162	-0.044378	0.422475	0.700706	-0.186495	-0.850259	-0.0806738
4.83388	2.20422	-0.13162	1.73737	-0.775567	1.28705	-1.08266	-0.355135	1.45047	1.16563	-1.09661	0.0946426	0.0602171	0.0310526	0.801795	0.774683	0.198526	-0.599048	-0.286053	-0.310107	-0.585769	0.501304	0.595168	-0.806471	0.517807	-0.650079	0.393087	0.627246	0.0878035	0.436943	-0.582462	-0.332902	-0.385121	0.501718	-0.12241	0.407525	0.221605	-1.55268	0.165903	0.352473	-0.111986	0.374466	-0.482986	-0.230822	0.751666	0.347635	0.0818876	-0.586147	-0.971134	0.387583
7.3674	-0.854024	3.71896	0.210416	-0.453383	0.395065	0.293785	0.0292564	0.590614	-0.0996032	1.06359	0.721784	-0.959991	0.362237	-1.04167	0.568215	1.29299	-0.458286	-0.305777	-0.741238	1.2521	0.67832	1.34973	-0.523774	-0.954447	0.656516	0.539745	0.0430998	-0.166161	0.515054	-0.293334	0.0288281	-0.410701	1.06308	-0.527724	0.428004	-0.800997	0.381302	-0.280939	-0.98967	-1.00752	0.0561839	-1.17719	0.188821	-0.415143	0.269271	-0.883818	-1.00999	-0.68537	-0.612572
-4.18802	-1.08	-0.132799	0.881166	0.457296	0.831593	-1.28179	-0.900362	0.989309	-0.138904	-0.27705	0.932881	-0.0236891	-0.629235	0.41083	-0.28767	0.497058	-0.940513	0.0351148	-0.281334	0.107225	0.233737	0.973363	0.128722	1.03921	0.293644	-0.0766063	0.111886	-0.118153	0.198853	-0.137706	-0.977713	0.584388	-0.326108	-0.233545	0.15426	0.424945	-1.06148	-0.444291	0.134325	0.652047	-0.339291	-0.457148	0.444122	-0.0763724	-0.254681	-0.256701	-0.0337842	0.103301	-0.47245
-5.48586	-1.2364	-0.616104	2.01837	2.53573	-1.29545	0.93234	0.213531	-0.184981	0.219033	-0.463639	1.12772	1.29857	0.811641	-0.274746	1.93827	-0.246245	-2.55257	0.116979	0.741296	-0.185642	0.197573	0.904061	0.043469	-0.510038	-1.11147	-0.893944	-0.0630857	1.14791	-1.46557	-0.414657	0.108752	-0.747035	-0.118999	0.475956	0.536778	-0.210415	0.229402	-0.500106	-0.0187175	-0.197097	-1.02797	-0.90553	0.676154	0.0503968	0.0886606	-0.132678	0.153961	-0.553485	-0.586985
-3.37472	-0.724362	0.207269	2.23024	1.16415	-1.54904	-0.754281	-0.453578	-0.448817	0.144676	-0.230308	0.975765	0.885357	0.894945	-0.454052	-1.08638	0.353345	-0.37546	-1.20117	-0.0525573	0.47151	0.310001	-0.51519	-0.241512	0.497102	0.698157	0.541312	-0.583187	-0.887367	-0.087063	-0.161583	0.749021	0.451181	0.81257	0.360343	0.0566982	-0.211603	0.0469662	0.53139	-0.75052	-0.0720392	-0.424804	0.244077	-0.380543	0.203106	-0.284979	-0.715654	-0.636776	1.06153	0.454608
11.9735	-0.566738	0.648703	0.680727	-0.209312	1.65675	1.22718	1.16129	-1.78145	-0.77405	-0.245916	0.890053	0.319593	-0.939738	0.592957	0.126947	-0.82973	0.742393	-1.05063	-0.121359	0.201188	0.241775	0.422783	1.72017	-0.299918	-1.0143	-0.269765	0.289371	-0.292473	0.163482	0.646541	0.176091	0.994509	-0.228891	0.967752	0.822623	0.546899	0.0390284	-0.448639	-0.137284	1.44092	-0.488551	-0.929553	0.383873	-1.32294	-1.29265	0.729465	0.936669	-0.62239	1.08098
10.4915	-3.27186	-0.112155	1.77542	2.82849	0.806426	-1.45081	0.622186	0.443335	0.384566	1.05736	0.633861	1.32823	-0.415177	-0.857424	0.604254	-1.00126	-0.585235	-0.355366	-0.280129	0.57058	-0.392431	0.2315	0.843229	1.24464	-0.0851942	-0.470921	0.799177	-0.283699	0.333461	-0.00890403	-0.768463	-0.441265	-0.306395	-0.68106	0.057866	0.0392608	1.2856	-0.505717	0.282326	-0.799089	-0.23192	0.334814	0.456914	0.724741	0.178669	0.978262	-0.06641	0.157128	0.567857
-1.0462	1.42368	0.575966	-1.67207	0.0494505	0.970398	0.691074	2.04708	0.945824	-1.27761	0.292633	-0.925909	0.371708	-1.45438	-1.78421	0.68242	0.514875	-0.390063	-2.07883	1.2273	0.183284	1.09625	0.0631781	-0.00867008	-0.215935	-0.800043	1.47339	-0.375333	-0.763529	0.685576	1.76722	-0.590451	-0.323837	-0.389788	-0.0776967	-0.342275	1.18551	-1.03384	-0.180045	-0.338052	0.115233	-0.479858	1.22623	0.369163	-0.852504	0.154643	-0.14755	0.394483	-0.0372536	0.562528
10.8859	0.157203	-0.344856	0.747428	0.543816	-0.216287	1.13811	-0.168951	-0.0910819	0.846084	0.687973	0.66068	-0.999728	-0.285571	-1.38657	0.520321	-0.0636756	0.214266	0.793471	0.755118	0.246135	0.0240309	0.725456	0.250012	-0.20999	0.0624753	-0.00353929	1.28159	1.04847	-1.45182	0.67918	0.180896	-0.0995388	0.483724	-0.594106	-0.622268	-0.471563	0.260625	-0.25711	0.352514	-0.550564	-0.0329541	0.991636	0.0931808	0.241446	0.0576512	0.111217	-1.01493	-0.0246169	0.367631
6.0308	-0.68262	-1.54847	-2.18095	-1.87886	0.76562	-0.119719	-0.900592	-0.252763	0.983589	-1.29192	-0.95816	-1.0469	-0.441007	0.832361	1.0408	-0.856965	-0.372372	-0.754512	-0.0197353	-1.0737	0.0015267	-0.883349	1.61413	0.200907	-0.223726	-0.154274	-0.557177	0.463316	0.42768	-0.598981	-0.362166	-0.44713	-0.226498	-0.270077	-0.470466	0.278019	0.361898	-0.882036	0.340302	-0.392339	-1.00001	-0.576487	0.647276	-0.313731	-0.0475866	-0.387256	-0.0243967	-0.121366	0.245076
2.16404	-0.256463	-0.352791	1.31097	0.605	1.11732	0.901087	-0.170816	0.465803	-0.429984	0.301158	-0.34625	-0.936277	0.00940209	0.979158	1.44951	-0.280344	0.832548	-0.203585	1.25502	-0.542608	-0.937725	0.1058	0.207131	1.52617	0.760132	0.644915	-0.623184	-0.627755	0.949497	-0.431635	0.31817	0.40828	0.465162	-0.370643	-1.09674	-0.844713	-0.937335	-0.408248	-0.127715	-0.933523	0.404461	-0.0282972	-0.259413	-0.253608	-0.543881	-0.436281	0.395715	-0.365725	0.471015
3.71037	0.0847238	-0.0660964	0.835222	-0.0464133	1.8742	-1.0341	-1.32548	0.0838532	0.369429	-0.785488	-0.0281875	0.184087	-0.470708	-0.64901	0.189596	-1.1346	0.95496	-2.00973	-0.290475	-0.808588	-0.290267	-1.20606	0.594507	0.189708	0.877517	-0.0765419	-1.0296	0.203846	0.174443	-0.0187914	0.199565	-0.608797	0.0241783	1.13585	0.249344	-0.0996892	0.150472	-0.328556	0.363302	-0.53083	-0.724375	0.702364	-0.344183	-0.0937031	0.290696	-0.606002	-0.59782	0.627137	-0.626214
9.14064	1.33934	1.46628	1.65554	1.5473	0.739402	0.0585265	-1.28446	-1.4217	-0.148294	0.362865	0.843095	0.683073	0.196325	0.20978	1.75671	0.199574	-1.02273	0.27054	-0.555758	0.496671	-0.621538	0.717855	-0.677397	-0.802212	0.449126	0.542001	0.249012	-0.360588	1.34479	0.636042	-1.70404	-0.560583	0.0717646	0.293523	-0.39772	-0.0688896	0.250684	-0.660202	-0.153787	1.08089	0.206273	0.517247	-0.17668	-0.106897	0.160257	0.703924	0.191487	0.0791247	-1.06711
3.21465	0.57992	-0.730233	1.88089	-0.536937	-1.72973	1.45246	-0.207639	1.12664	1.55249	-0.0983166	0.420802	0.348447	-0.627355	-0.0296145	0.230769	-0.736431	1.67188	1.1345	0.847179	-0.246464	-0.444405	0.937935	-0.114025	0.683633	-0.0706964	0.22907	-0.0885139	-0.96548	0.0168016	-0.0559535	-0.36549	-0.602706	0.458444	-0.185388	-0.457159	0.179023	0.149296	0.085756	-0.69885	-0.124122	-0.573147	-0.0443431	-0.646064	-0.194793	-0.0961227	-0.129197	0.246501	-0.104136	-0.0326049
1.93663	0.311038	-1.11656	0.526073	0.886556	-0.075155	0.418178	1.33365	-1.57965	0.106635	-0.308762	-0.581022	0.949114	-0.496589	-0.289418	1.55798	-0.856007	-0.136132	0.238303	0.607549	0.340022	-0.461132	-1.02294	0.0449318	-0.727134	0.952111	0.719078	1.03833	0.958762	0.608445	-0.680693	0.163943	0.203195	-0.92129	-0.107286	-0.20449	-0.625375	-1.01743	0.934415	-0.141251	-0.074691	0.695904	-0.260332	-0.123774	-0.807197	-0.106992	-0.589194	0.35619	0.240344	-0.23358
5.13797	-1.49714	0.612567	-1.2167	-0.546624	0.530083	-0.753238	-0.443497	-0.873664	0.270822	-2.53115	0.144955	0.306065	0.875405	0.964038	0.281427	0.461849	-0.260995	0.720154	-0.509074	0.183871	0.677674	-1.36279	0.708852	-0.118931	-0.504095	-0.118206	-0.167414	0.0619553	0.0220765	0.534345	0.395829	0.402185	-0.0970699	0.535874	0.0727336	0.356509	-0.0145725	0.134231	-0.810161	-0.330886	-0.302111	1.38939	0.992702	-0.284135	0.179695	-0.657443	0.160975	0.67513	1.12796
-2.91919	-1.5667	-0.47074	0.969528	-0.803472	-1.12791	-0.473146	0.105436	-0.244745	-0.248747	-0.695459	-2.09972	0.226149	0.826433	0.194456	0.606868	-0.198311	-0.587967	0.944117	-0.049834	-1.03948	0.186336	-0.868492	-0.403545	0.0648924	-0.544214	0.236205	0.268754	-0.629864	-0.727947	0.833248	0.533881	0.42035	0.52323	0.238045	0.207724	0.106148	0.357008	0.143097	0.892512	-0.932467	-0.198548	-0.173691	-0.177728	-0.0407933	-0.896084	0.81177	0.252691	-0.0781445	0.0820486
5.75801	3.05389	0.774036	0.753216	-0.818615	-1.39185	-0.723931	-0.134094	2.34852	0.970831	1.07968	0.430827	-0.750702	-0.867891	0.283976	0.891585	0.250859	-0.449332	0.785187	0.809109	0.179869	1.0787	2.27335	-0.411192	-0.808127	0.468175	-0.671964	-0.599216	-0.152076	-0.521699	-0.262289	-1.42402	0.0383457	-0.114369	-0.540167	-0.203272	-0.289318	0.496112	-0.123685	0.403663	0.460406	-0.396951	0.570979	-0.798332	0.25555	-0.585372	-0.237329	-0.322659	0.380383	-0.353053
-1.7672	-0.263192	0.0495719	0.435857	0.548403	0.0428733	1.02132	-0.0645297	1.42529	0.233724	-0.395406	-1.41393	-0.351607	-0.0705082	-0.0798288	-0.59171	-0.0146225	-0.928481	0.00782946	0.291229	0.202234	-0.008163	0.450577	0.446128	0.282713	-1.03996	0.205419	-0.176626	0.228215	-2.00679	0.416143	-0.814312	-0.263348	0.252042	-0.0181453	-0.212742	0.12562	-0.491223	0.117518	1.04443	-0.733828	-0.804307	-0.898702	0.902596	0.268169	-0.51396	0.366193	-0.374345	0.02665	0.296105
4.91927	-0.249247	-1.38624	1.47059	-0.244444	-0.0708697	-0.254632	1.59361	0.450435	-0.604847	0.311066	0.0272341	-0.651126	0.638804	0.090453	1.06766	0.31319	0.109566	-0.421188	1.48886	-0.10785	0.297204	-1.94264	0.769002	-1.85222	-0.988926	-1.85451	1.04681	0.535948	0.136526	-0.233265	0.812188	0.592864	0.0231304	-0.0283143	0.192671	-0.439188	0.373485	-0.475789	0.225634	0.104893	-0.517933	-0.487748	0.147365	-0.0477108	-0.556513	-0.315421	-0.094187	1.06514	-0.677281
4.042	-0.047965	1.06572	-0.58508	-1.16135	1.0424	-1.24669	-1.80911	0.554415	0.693732	-2.08684	-1.41177	-0.509974	-0.0970492	-0.596355	-0.369201	0.497792	-0.879852	-1.69333	-0.816202	0.6487	0.402411	0.381596	-1.00922	0.309844	0.94899	-0.638143	-0.260405	0.0876726	-0.246572	0.595384	-1.17991	0.987699	0.21767	-0.183535	-0.465689	0.821945	0.323159	-0.60883	0.304595	-0.998644	0.14519	-0.340692	0.304658	-0.249542	0.0463994	-0.0940105	-0.665822	-0.322731	0.737702
-1.82011	-1.57459	0.748805	0.567965	-0.920469	-0.677626	-1.30109	0.0792963	-0.277913	-0.858812	-0.997611	1.24152	0.950037	-0.753263	-1.57835	0.315722	0.392658	0.28347	-0.298093	0.900848	-0.625513	-0.311185	0.151228	-0.354455	0.507121	1.54652	0.236465	-0.14899	-0.606577	0.886995	0.97212	0.439891	-0.101467	-0.0943893	0.171953	-0.493358	-0.178555	0.633904	0.628835	-0.373036	-0.0282468	-0.881801	-0.123205	-0.220107	-0.131006	-0.3435	-0.371541	-0.415723	0.449237	0.295268
2.3668	-2.6426	-0.419422	1.12495	0.377437	-1.8133	0.455544	-0.975091	-0.641223	0.409959	-0.957941	0.867232	-0.569691	0.0684798	0.638202	1.07787	-0.34279	0.273006	-0.00191399	0.232351	1.23418	-0.696101	0.358195	-0.266317	-0.516562	0.319034	0.105357	-0.497785	1.06052	0.920759	-0.203352	0.353854	0.990548	-0.53846	0.134664	-0.0827511	0.449799	0.59123	0.0219233	0.744656	-0.617052	0.929216	0.283498	-0.622386	0.162443	-0.0832033	0.515012	0.0726266	-0.199233	0.946925
4.66523	-2.77782	1.11249	1.90172	0.491656	0.362947	0.105153	-0.194133	-0.779551	0.467453	-0.201678	1.31017	1.66224	0.234584	-0.634838	-0.772216	0.13553	-0.547219	0.0327385	0.900233	-0.234544	0.0538015	0.183843	0.329069	0.850228	0.442203	-0.648078	-0.377535	-0.0358992	-0.0187861	-0.673048	1.13058	-0.0398745	0.186101	0.726375	0.723882	-0.393577	0.541127	-0.0783142	-0.392123	0.939566	0.722302	0.0130147	-0.219547	0.42958	0.552476	-0.572302	-0.755246	0.976008	-0.706383
5.13156	-1.06272	1.4407	1.04654	-0.408278	0.886028	1.42498	-0.478993	-0.517134	-0.96647	0.280899	0.405137	0.058691	0.583937	0.792676	0.250142	-0.847939	-0.197876	0.753878	-0.166059	-1.04046	-1.03814	0.0274794	-0.865689	-0.460831	-0.440987	-0.472982	0.434089	0.332634	-1.19657	0.13765	-1.17602	-0.469695	0.55226	0.706636	-0.496074	0.00624521	0.414504	1.24337	0.000548201	0.783237	-1.01411	-0.659544	0.469581	-0.069531	-0.303403	-0.176839	-0.245169	-0.243929	-0.232407
9.16353	0.987914	0.21312	-1.22199	1.1357	1.03126	-1.08259	0.335705	0.799036	0.535891	1.81781	-0.0764761	0.154334	-1.61576	1.05268	0.156139	-0.371171	-0.171481	-0.426807	-0.922454	0.232936	-1.08736	-1.36129	0.306653	0.632457	0.0188754	-1.07128	-0.994759	0.64476	-0.0398554	-0.0397359	-0.405398	0.417515	0.136764	1.01771	-0.169572	0.208204	0.0203246	0.57864	-0.377436	-0.566461	0.103072	0.529345	0.123755	-0.00922366	-0.186089	0.24309	-0.250107	-0.288897	-0.325413
7.62421	-0.366814	1.37361	0.877486	-0.0249915	-0.134788	0.652997	-0.358352	0.317517	1.86865	-1.14627	-1.15371	-0.34259	-0.0845992	1.43431	-0.875386	-0.751072	-0.121749	0.67912	0.972768	0.0331855	0.729865	1.90439	0.868876	-0.687296	0.631771	1.03432	-0.435729	0.135291	-0.624789	-0.687564	0.343364	0.0449016	0.219376	-0.345977	1.29352	1.02809	0.21872	0.434583	-0.4655	-0.975235	-0.290384	-0.0356402	-0.74286	-0.575301	1.14928	0.149128	0.435445	-0.195342	-0.205501
3.04726	2.12078	-0.951193	0.955884	-0.855156	-1.27661	-1.48548	0.0813253	0.0629656	-0.0478906	0.582708	-1.2956	0.865208	0.0935428	-0.433266	-0.667102	0.204349	-0.404983	-0.357589	0.520003	-0.0294608	-0.44976	0.0626394	-1.07055	-0.967338	-0.44183	-0.864285	0.544513	0.64536	0.63605	-0.21806	0.21263	0.790072	-0.203685	0.139482	0.693366	0.368459	-0.117966	0.571365	-0.776359	0.00929074	-0.206604	-0.344141	1.20498	-0.0859776	0.763142	0.450333	-0.702303	-1.32532	-0.579875
4.98256	-0.60964	-1.70472	0.399213	-0.362778	-0.167196	0.102657	0.749128	-0.769389	-0.0388765	-1.34939	0.139582	0.774794	-0.110493	-0.450303	0.381995	0.51767	-0.408391	-0.155187	-0.145417	0.60197	0.29979	-0.389993	-0.568444	-0.694342	0.140895	-1.16568	-1.29068	0.210644	0.202285	-0.223124	-0.29999	0.356264	-0.239926	0.1591	0.147729	0.555398	0.74793	0.529104	-0.334563	0.672102	1.00783	0.337742	0.65299	0.648138	-0.447514	-0.35436	-1.10263	-0.117923	-0.0273142
-3.62535	-2.04739	1.10235	1.15226	-0.799348	-0.666147	-1.63252	-0.218372	-0.625487	-0.668462	-1.41614	0.469385	0.587773	0.609855	0.924715	-0.175441	-0.264018	0.16093	0.545367	1.07216	0.243468	-0.499798	-0.0853192	0.59153	-0.402576	1.13406	-0.409686	0.0605384	-0.12392	0.193409	-0.986206	-0.660871	0.0781234	-0.112622	-0.0905172	-0.805378	-0.114908	-0.852926	-0.305659	0.509531	0.562419	0.588383	-0.217965	-0.185483	0.116423	-0.940273	-0.570585	0.00111485	-0.250801	0.0880699
6.27435	-0.079863	1.39762	-0.945057	-0.666078	0.071681	2.05493	0.553239	-0.961213	2.7018	-0.038741	0.772261	-0.0440438	1.23402	0.546183	1.53835	0.0208363	-0.84148	0.283678	-1.15034	0.61301	0.433057	0.701421	-0.538572	-1.42583	0.0105113	0.707904	0.226319	0.629173	-0.141797	-0.123964	-0.731183	1.09292	-0.0997627	0.38778	-0.785656	-0.0203071	-0.707806	0.745073	-0.0143492	-0.177334	0.604281	1.33498	-0.475647	-0.337879	0.311284	-0.328769	-0.750617	-1.16154	0.850963
5.91167	0.612644	1.38094	0.474518	0.230438	-0.0285774	-0.588826	1.00632	-0.832996	-0.247114	1.27715	-0.366114	0.272379	-0.282964	-0.781624	0.272271	0.634256	0.199548	-0.0937681	-0.612645	0.733821	1.10949	-1.29026	-0.46064	-0.686521	1.27707	0.311595	-0.0943202	-0.694476	0.737759	-0.168865	0.05547	0.86324	1.06205	-0.159907	-0.451292	-1.01219	-0.451059	-0.289244	0.160679	0.447433	-0.139725	0.638098	0.244153	0.704801	0.183971	-0.301936	-0.134487	0.135413	0.135206
-2.3003	0.478739	0.0148858	1.00457	-0.715094	-1.12766	0.275246	-0.142318	-1.51712	-0.609203	-0.845365	0.0152161	-0.534591	0.990647	0.0185045	-0.450971	1.41024	0.67786	1.2739	1.20015	0.588047	-0.080054	-0.546443	0.150198	1.29816	-1.54329	0.690144	-0.596459	0.502681	1.12023	1.66973	0.11926	0.332184	-0.838157	-0.545043	0.428114	-0.303929	0.0511529	-0.00604586	-0.170062	-0.322699	-0.550567	0.218309	0.352801	-0.259925	-0.055243	0.580709	0.328783	-0.535058	0.695996
0.881622	-0.327518	-0.403915	-1.20309	-2.28896	1.09654	0.341972	0.878328	0.412133	1.48872	-2.25645	0.0519867	-0.437729	-1.03246	-0.0304566	-0.325194	0.0112824	0.281571	-1.03589	-0.185226	-0.236252	0.250432	-0.66473	-1.3018	-1.17403	-0.26747	-0.521042	0.637314	-0.811667	0.0527669	1.35758	-0.289248	0.429127	0.502179	0.669722	0.600527	0.729202	-0.272483	0.428889	-1.18299	0.687054	-0.287966	-0.167303	0.0993289	0.714203	-0.50904	0.457495	0.0862642	-0.0944403	-0.427
5.01992	-0.740009	1.58399	-0.140681	-2.14146	2.03611	-0.231388	0.247072	0.953191	1.03836	-0.903097	-0.349345	-0.102568	-1.3541	0.778353	0.233619	-1.64481	0.58321	0.996945	0.206422	-0.664844	0.821148	-1.73085	-0.5047	-0.374181	-0.686433	1.00747	-0.124837	-0.539572	0.457132	-0.471431	-0.108745	0.0538173	0.569401	-1.52564	-0.372749	0.259548	-1.09171	-0.193948	-0.400704	-0.455545	-0.735339	0.193608	-0.288995	0.345287	0.744303	0.957611	0.617773	0.705515	-1.00381
3.43886	-0.752194	-0.799012	-0.50325	0.810299	-0.717904	-3.02017	-0.389353	-0.791794	1.25334	-0.777326	2.10157	-0.910504	0.907775	-0.557105	0.677964	0.73435	1.11286	-0.0691138	0.73677	0.760133	0.552347	1.01138	-0.797063	0.312729	0.819372	0.181148	0.534995	-0.325628	-0.400285	-0.267248	-0.48691	0.625223	0.122832	-0.829462	0.146323	-1.24275	0.975667	0.425162	-0.786444	0.874169	0.673088	0.393172	1.1835	-0.264551	0.16382	0.316741	-0.0188263	-0.336278	-0.0210406
4.26155	-0.0951702	-0.472797	0.781805	0.668471	0.119838	-0.540007	-0.281958	0.497235	0.43764	0.93255	0.310251	-0.0887602	0.257034	0.837171	0.464389	0.295357	0.404479	0.202161	0.215036	0.674345	-0.260992	1.16456	-0.434588	-0.0909224	-0.348645	-0.796379	0.311455	-0.786537	0.31646	0.435834	0.626132	-0.438915	-0.163345	0.458684	-0.141352	-0.667325	0.298484	0.429709	-0.11413	-0.395677	0.304941	0.227453	0.297908	-0.841303	0.912764	-0.215031	0.513601	0.550372	-1.05785
2.53365	-0.956546	-1.14514	1.41023	0.677594	-1.17981	1.05368	0.0288559	0.49876	0.0247712	2.11747	-0.52037	1.10445	0.641352	0.0480631	-0.146868	-0.0691198	-0.791069	0.181424	0.424357	-0.890191	1.67293	0.466094	0.765615	-0.0889278	-0.222003	-0.785603	-0.0351792	0.561659	1.11672	0.256409	-0.237179	0.457502	-0.344428	-0.86314	-0.276914	0.907902	-0.432104	0.436999	-0.0229299	-0.307657	0.00335755	-0.691628	-0.260359	-0.813537	-0.713756	-0.278136	0.155435	0.437254	-0.0777831
2.54525	1.52229	-0.696141	1.64022	-0.793369	0.112151	-1.24725	-0.339774	1.60328	0.767672	0.42877	-0.759759	0.0387421	0.220514	-0.0802814	-0.21572	-1.27085	-1.26377	1.24559	-0.349299	-0.134665	-0.021295	-0.417937	0.072567	0.694861	-0.1866	0.592489	0.129359	0.68336	0.390938	-0.247742	-0.216355	0.503911	0.00356162	0.628911	-0.53371	0.748717	-0.651237	0.116731	0.103048	-0.0552826	-0.0505029	0.0267707	-0.0275586	0.00831439	0.613361	-0.732786	-0.292482	-0.457826	0.87122
8.11564	0.188416	0.322956	1.26173	3.12981	-2.15799	-0.120164	-0.416349	-1.23154	-0.0319744	0.204107	0.299839	-0.605828	-0.867015	1.07128	-0.578536	-0.600631	-0.463793	-1.88657	-0.486074	1.81183	0.59623	0.402481	1.10385	-1.07619	0.013822	0.727692	1.86374	-0.792577	0.330533	-0.971769	0.056982	-0.956715	-0.682426	-0.718348	1.14432	-1.19668	0.57584	-0.114179	-0.571414	-1.41933	0.0820616	0.507586	0.320231	-0.340849	-1.12279	0.110947	0.475688	0.886993	-1.00571
3.30922	-0.625338	-1.24852	0.0308694	0.895054	-1.66836	0.594092	2.0731	-1.08638	0.366435	-0.952342	0.371645	-0.829534	-1.09648	1.5278	-0.614091	0.102017	1.61174	-0.947619	-1.06033	0.0638331	0.990064	0.463667	-0.77547	-0.344952	0.142131	-1.12949	-0.106962	-0.273176	-0.675036	-0.765272	1.22721	0.338571	0.298793	0.206084	-0.762502	0.290603	-0.312292	-0.730909	-0.409243	-0.255442	-1.14819	0.0687076	-0.337892	0.0890427	0.0180068	0.521794	-0.0915949	0.516742	0.335668
-7.75334	-1.70486	-0.655642	3.39445	-0.22021	0.242892	-0.0539868	0.623926	-0.670975	0.00394866	-0.0748681	0.330904	-0.723108	1.88299	-0.813484	-0.896518	-0.0340819	-0.202815	-0.130462	0.926328	0.798333	-0.339638	-0.050559	-0.652043	-0.10312	-0.539911	-0.42492	-0.546815	-0.721383	-1.59042	-0.293856	-0.939618	-0.0354247	-0.821809	-0.649248	-0.901472	-0.271584	-0.671649	-1.13115	0.395247	-0.184483	-0.505339	-0.213204	0.0477266	0.096279	0.297069	0.487175	0.617124	-0.190969	-0.0510081
5.59803	-1.87287	0.953096	0.764543	0.467719	1.03786	-0.506734	-0.17334	0.356766	1.19176	-0.281801	0.294674	-1.57271	0.8016	0.25933	-0.967177	-0.116923	-0.77402	0.791219	1.02138	0.184299	0.274466	-0.0790913	-0.625933	0.324028	-0.363195	-0.228349	0.15127	0.454893	-1.78543	0.297169	0.340912	-0.276956	0.969077	0.560118	0.604815	-0.539262	-0.550045	0.969847	-0.450603	-0.714543	0.0784884	-0.292478	0.109696	0.164855	-1.36551	1.18769	-0.251771	0.417114	-1.76049
-2.20831	-1.94361	-0.163135	1.13498	0.256103	-0.801177	-0.573237	-0.207955	-1.16273	-0.776231	0.0705406	-1.22118	-0.578702	0.540518	-0.117616	0.0995662	-2.20992	-0.263711	0.0840815	0.416132	0.235434	-0.208381	-0.0132597	0.492979	-0.253387	0.376988	0.872216	0.841152	0.353331	0.401308	-0.985071	-0.829725	0.758762	-0.421934	-0.651771	0.145966	-0.560147	0.0701707	0.598446	-0.0106033	0.734709	0.703425	0.332388	0.11644	0.0887754	-0.122156	0.0899326	-0.436506	-0.338062	-0.123189
0.524448	0.720435	-1.41849	-1.00167	-0.401707	-1.40385	1.48966	-0.130871	1.03301	0.980377	-1.69886	0.921126	-0.294786	-1.53848	-1.84648	-0.807625	0.627741	0.631345	-0.290677	-1.11356	-0.943051	0.289987	0.0388629	-0.0781936	-2.24742	-0.539363	0.269225	-0.346991	-1.06079	-0.528417	-0.686332	0.21025	-0.80509	0.411339	1.02825	-1.00409	-0.193465	0.121696	1.06585	1.18853	0.285127	0.307539	-0.0222542	-0.224464	-1.23072	0.324317	0.138853	0.556667	0.349124	0.95537
9.28157	1.9402	1.10863	-0.594533	-2.29895	-0.0335201	0.710407	0.47736	-0.768795	-0.378711	-0.841408	1.21106	-1.26915	1.5067	-0.953262	-0.318086	-0.637399	0.591539	-0.388803	1.10459	-0.589719	-0.23149	0.827481	-0.281904	-0.989241	-0.232053	0.448635	0.00619553	-0.957883	0.00661381	-0.491966	-0.328342	0.4763	0.0549018	0.373844	-0.283853	0.133265	0.499764	-0.00325563	0.0688628	1.10178	-0.975552	-0.138979	0.114858	-0.641478	-0.636236	0.287588	0.549086	0.308443	1.167
1.23218	-0.0623555	-0.364445	0.738342	-0.780199	1.67494	0.421909	-0.450522	0.218706	0.696196	-0.256429	-0.267893	-0.196891	0.13329	-0.518469	-0.975645	-0.352439	1.21756	-0.0403136	-0.529425	-1.32348	-0.0659854	-0.344488	-0.45725	-0.379997	0.438917	-0.477404	-0.0726092	-0.378362	-0.169347	-0.48853	-0.140464	-1.51899	-0.0782734	-0.453741	-0.0335648	0.195367	0.0107445	-0.434302	1.48725	-0.196415	-0.288335	-1.04755	-0.197672	-0.355853	0.741925	-0.0910954	0.566313	-0.293975	0.0189801
6.48313	1.17279	0.315581	0.457506	1.92329	0.747151	0.471662	0.978621	1.05553	0.210618	0.181429	-0.991697	0.744215	-1.3175	-0.474426	0.263152	1.3101	0.247579	0.863824	1.04741	0.66109	0.345683	1.06406	0.00649851	-0.538305	1.29292	-1.20662	-1.34708	0.211006	0.0248202	-0.528	0.449843	1.74224	-0.409859	0.310375	0.212601	-0.656305	-0.225668	-0.368118	0.40549	-0.691301	-1.151	-0.64595	0.0898324	-0.934761	0.389098	-0.343074	0.105389	0.523	0.257583
1.8043	-1.1967	0.59469	1.2491	0.707566	0.335416	-0.561892	-0.312816	1.44724	-0.0371756	-0.627732	0.983941	0.557162	-0.26331	-0.156	0.13168	-0.757096	-0.801094	0.477724	0.20369	-0.660241	0.96934	0.415949	0.883992	0.093018	-0.260623	-1.25996	-0.39455	-0.0257413	0.0567722	0.00536301	0.480085	0.671406	-0.230203	0.463845	-0.101612	0.069259	-1.35849	-0.312116	0.0138196	-0.103064	0.443726	-0.644978	0.129225	0.577843	-0.00898365	0.29574	-0.0519765	0.0317218	-1.19149
4.75593	-0.134929	2.66613	-0.912937	0.626002	2.57286	0.0370201	0.741716	-0.847368	-0.397595	0.788726	1.48155	0.740847	0.208281	0.21734	-0.0645368	-0.708988	-0.123855	-0.568002	0.612828	-1.14986	0.263634	0.767712	1.39489	-0.187527	-0.375868	-0.473798	0.843329	-0.608321	-1.05949	0.183745	0.336927	-0.00679995	1.00793	0.679663	0.79486	0.750054	-0.840053	1.00545	-0.199308	0.469667	-0.871324	-0.850844	0.581913	-0.250784	-0.228639	0.221861	-1.14985	1.38606	0.171096
3.588	-0.689398	0.682021	0.698072	-0.273952	0.938654	-0.99207	1.54774	-0.187092	1.18595	-0.6089	-2.17148	-0.369594	0.305675	-2.03104	-0.259454	-0.153528	-0.736371	-1.18257	-0.0895552	0.495655	0.556693	-1.44408	-1.24344	-0.814591	-0.611314	0.137908	0.395783	0.399907	0.55597	0.93964	0.636614	-0.154902	0.121528	-0.294406	-0.627852	-0.225806	0.882877	0.586786	-0.254001	0.964642	0.535745	-0.0356162	-0.0646108	0.603234	-0.661544	1.10667	-1.04559	0.192112	0.033913
10.727	1.97507	0.831843	0.0547091	-0.941417	2.13613	0.932312	-0.850678	2.8549	-0.413038	0.838783	0.142705	0.806789	0.585822	-0.0407361	0.481931	-0.648181	-0.465034	0.32558	0.160125	0.0203122	0.0574362	0.978062	0.0363928	-0.285368	0.0198921	0.1933	-0.206414	1.27981	-0.123646	0.45218	2.2839	0.417951	0.96163	0.0995638	0.156027	0.63201	1.23506	-0.336601	-0.427975	-0.000504972	-0.242024	-0.502109	-1.19592	-0.210512	0.0844337	-0.767442	0.723073	-0.118487	0.134238
8.14247	0.376075	0.693306	-0.186782	2.34434	-0.234374	0.709953	-2.09819	1.64994	-1.07796	1.28625	-0.559046	0.841133	0.164751	0.865224	0.931456	-0.707478	1.89378	-0.562027	-1.02194	-0.846235	0.88181	0.454106	0.656349	0.582428	-0.0151433	0.141211	0.400153	0.0175875	-0.365131	0.576385	0.247836	-0.376335	0.804801	-0.296668	-0.4265	-0.719518	-0.392876	-0.0530304	-0.622721	-0.590975	0.0497955	-0.598102	0.916108	-0.187877	-0.632913	-0.140492	0.113635	0.52349	0.553305
5.45406	-0.34135	-0.553627	-0.566697	-0.345795	-1.42298	-2.08194	0.688486	0.803391	0.974099	0.61922	0.473469	-0.506658	-0.27592	-0.588867	0.331544	-0.565366	-0.746995	0.888488	0.150088	0.188467	-0.256165	-0.291161	0.566938	1.01707	0.139728	-0.596405	0.00180532	-0.876947	0.455213	-0.346584	0.514717	-1.29739	0.327086	0.0702557	0.917818	0.940469	0.398092	0.319681	-0.823224	0.0355407	0.346528	0.401209	0.159993	0.533489	0.346452	-0.0449114	-0.00298693	0.0683098	0.580287
10.3107	1.99158	2.37646	1.57127	0.800914	1.16704	1.30031	0.696121	-0.798616	0.194353	1.68401	1.01535	0.0654667	-0.130684	0.359514	-0.762612	2.04113	0.556384	0.0393399	-0.614583	0.435568	-0.198246	0.390916	-0.567565	0.157559	0.178359	-0.439843	-1.23929	-0.92041	0.0925384	-0.181125	-0.38927	-0.327738	0.581403	0.871878	0.133938	0.0547992	1.01731	0.357805	0.00804735	-0.452218	0.38115	0.0334781	-1.01623	-0.747506	0.132196	-0.0678626	0.0888759	0.848385	-0.123602
4.52532	-3.37519	-1.60449	-0.968155	-0.231007	1.35417	-0.130675	-0.145923	0.688479	-0.752608	-0.180628	1.25176	-2.0783	-0.286431	0.726763	-0.577219	0.843955	-0.223806	-0.1839	-0.983826	0.340338	-0.752695	-0.225148	-1.22542	-0.0814326	0.0957974	0.420036	0.476464	0.041172	-1.19246	0.125569	0.272183	0.00476374	0.293387	0.686422	-0.937381	-0.0922742	-1.47895	-0.514234	0.559884	-0.733897	0.69476	0.602004	0.604705	-0.374683	-0.144906	0.215513	-0.41169	-0.35014	-0.138547
0.440961	-1.7268	2.1551	1.54888	0.033391	0.255193	-0.0458271	-0.467587	-2.58938	-1.37257	0.366313	-1.07882	0.667628	0.735621	-1.0259	-0.606281	-1.01118	0.270224	0.368041	-0.0906663	1.01248	-0.529483	0.219805	-1.31779	-0.126212	-0.890789	-0.0636955	-0.0983105	-0.40145	-0.406865	0.154388	0.0580813	-0.222698	0.66937	-0.336007	-0.433685	-0.235412	0.324962	-0.37057	0.0636509	0.26815	-0.383856	0.79312	0.169711	-0.818158	0.00439385	0.0410158	0.0028883	0.310107	0.435196
-1.20622	-2.43387	1.40317	0.802301	0.268653	-3.27151	-0.744039	-0.822836	0.691154	0.96886	0.0331603	-0.538989	-0.700361	-1.52495	1.0348	-0.338099	-0.394718	0.279626	0.148877	-1.3138	0.470882	-0.120809	0.843999	-0.0540273	-1.10319	-0.920337	0.372923	0.325489	0.409657	0.0814403	-0.0340674	-0.667433	-1.16769	0.160456	-0.558978	-0.0104268	-0.220632	0.79439	-0.104097	-0.28252	-0.722186	-1.07246	-0.120192	0.147218	-0.381156	0.0509167	0.537106	0.196042	0.407429	0.607114
12.0697	-0.610084	1.57128	2.45995	1.23055	1.3158	0.374909	0.227857	-0.754232	0.355764	-0.366378	0.992217	-0.341437	0.837954	-0.609379	-0.441564	-0.557584	-0.158722	0.77344	-0.919464	0.386037	-0.339922	1.02118	0.682731	-0.663716	-0.950787	-0.85909	-1.25034	0.405622	0.985366	-0.315449	-0.246338	-1.21712	0.0610662	1.00704	-1.1216	1.51081	1.06005	0.0680797	0.490397	-0.422195	-0.123732	0.694734	-0.123813	1.18533	0.364805	-0.827129	0.0420744	-0.334023	-0.131572
-2.69171	-0.941171	-0.786305	3.29333	-0.0476635	0.778697	0.324792	-0.189506	-0.804207	-0.299785	-0.698596	0.18663	0.802569	0.288651	0.392906	0.183827	0.193927	-0.205281	0.0913829	0.281158	-0.305575	-0.00210827	-0.256492	0.00580195	-0.50778	0.350329	0.245239	-1.13538	-0.37608	0.414958	0.386961	0.00044482	-0.573088	1.24115	0.234105	0.317679	0.527	-0.407244	0.53425	0.508356	-0.0171885	0.434872	-0.0518314	0.59441	-0.245843	-0.038207	0.943859	0.00199785	-0.325643	-0.0463386
0.366294	0.98055	-0.248582	1.38778	0.479568	-1.85041	-0.609977	-1.70748	-1.19349	-0.143758	0.173967	-0.784391	-2.13826	-0.617061	-1.05785	0.438324	0.30698	0.526243	-0.635179	0.0466444	-0.642257	1.46015	-0.530318	-0.313616	0.224582	0.574142	-0.0949712	-0.337257	0.354989	0.956368	-0.867139	-0.526461	-0.485673	0.00656443	-0.6461	0.353934	0.291677	-1.24263	-0.601504	0.275579	-0.119652	-0.499166	1.36586	-0.494724	0.875799	-0.182465	-0.335771	-0.196705	-0.261609	0.891705
2.77922	-1.19543	-0.942318	0.622366	1.04597	1.1292	-1.10379	0.936808	0.840827	0.665184	1.16183	-1.44507	0.56752	0.00876953	-0.119513	0.280657	0.303674	-0.110293	0.0744594	0.729107	-0.454007	-0.736298	0.628132	0.137611	0.906324	0.251045	-0.679247	0.172631	-0.440292	0.574106	0.489291	0.110382	0.166587	-0.986691	-0.0982874	0.444529	0.0201083	-1.08791	0.621004	0.0803444	-0.549324	-0.444182	-0.650549	0.412642	-0.927872	0.329785	0.0822893	0.0576586	-0.0343384	-0.914568
3.97957	-2.28373	0.0837964	1.88104	2.5275	2.05245	-0.797829	1.49897	-0.773266	-0.95214	-0.26283	-0.543862	0.0312142	0.390903	-0.818354	-0.505131	-0.479496	0.987528	1.05189	0.0435857	-0.534612	-0.673652	1.37291	-0.539283	0.134841	0.932942	0.360351	0.338413	-0.0198574	-0.907779	1.41068	-0.182314	-0.983463	-0.785154	-0.0732463	0.20462	-0.174162	0.731129	0.865936	0.116923	0.212421	-0.568922	0.465097	0.554855	0.4072	-0.53449	-0.834931	0.521422	0.954561	0.96871
3.2037	3.60298	1.85726	-0.900965	1.6009	1.4466	-0.954432	0.0606649	1.59607	1.37697	-0.385149	0.705272	0.911558	-1.9425	-0.564413	0.377099	-0.0192291	0.0385021	0.0410004	-1.72252	-0.555093	-0.259818	-0.411639	-0.51232	0.493087	0.697185	1.15755	0.527119	0.427735	1.23213	0.495847	-0.602333	-0.0961347	-1.46267	1.16208	0.439687	-0.350537	0.432047	0.716317	0.303459	0.563542	-0.479112	-0.691459	0.154992	-0.396985	0.0286433	-0.73126	-0.160609	0.0104107	-0.254351
2.23155	-2.0898	-0.697316	2.86571	1.0219	0.621054	-0.183143	0.545877	0.118282	-0.245637	0.890755	0.0864744	0.612192	-0.622581	-0.773866	1.54357	0.543513	-0.047625	0.223411	-0.399365	0.247312	-0.154013	0.28834	0.112543	0.163051	-0.432809	0.946583	1.19847	-1.44718	-0.33057	0.920855	-0.470397	-0.136628	1.12939	0.181248	-0.394359	0.998536	0.756463	-0.194152	-0.465526	0.279905	0.337494	-1.0022	0.0378236	0.401929	0.446111	-0.114452	0.269479	-0.266259	-0.162578
9.13011	-0.492006	-1.12816	1.36956	0.734345	0.492324	0.655965	-0.940868	0.351452	-0.157409	-0.773348	0.746542	0.823844	-0.445355	0.30108	-0.975991	0.0133349	-0.52218	0.589291	-0.904078	0.207878	0.0669947	0.468996	-0.434442	-0.36641	-0.235065	0.154761	0.0720789	0.464334	-0.379006	-0.121594	-0.194929	-0.596571	-0.526855	-0.615009	-0.288561	-0.199817	-0.0304358	-0.888749	0.218306	0.543792	0.836416	0.500966	-0.282611	0.662409	0.614504	-0.998086	-0.0355037	0.659743	0.582101
0.281297	-0.732	0.746419	-0.0429988	-1.07409	0.0581423	-0.146677	-0.104033	0.14215	0.203891	1.33522	-0.273715	0.150548	-0.825965	0.687621	0.121414	-0.936843	0.364901	0.0148782	0.256391	0.701749	0.695877	-0.308407	0.29397	0.18495	-0.366991	-0.559726	1.17033	0.960241	0.353138	0.0519812	-0.278048	-0.344323	-0.306531	0.423788	0.0911111	0.105677	0.29644	0.257372	0.0286454	-0.930842	0.55363	-0.127869	0.188407	-1.35059	0.560575	-1.06578	0.339853	-1.21985	-0.484373
2.74078	-1.48311	-2.74509	0.551442	0.697628	-0.915427	0.32762	0.648634	-0.792256	-0.018964	1.21225	0.66212	1.15986	1.13677	-1.04359	0.570215	1.62281	-0.289384	-0.643224	-0.590264	-1.2675	0.273813	-0.652629	-0.591959	0.791164	-0.909186	-1.63412	0.52309	0.0643899	0.702726	-0.285378	0.0237714	0.540695	0.516663	0.326015	0.501612	-1.14277	0.537843	-0.633742	0.383177	-0.949429	-0.566183	0.856433	0.195032	-0.652921	-0.584408	-0.0971102	0.0813029	-0.366563	-0.41346
14.0397	1.71965	-0.851473	-1.05007	-0.0988577	-0.55349	1.97273	-0.139066	-0.318711	1.18044	-0.155493	-1.89496	0.143037	-1.92837	0.982958	1.66127	-0.259046	0.0488967	-0.240043	0.110482	1.28102	0.0381118	-0.886867	-0.260481	-0.300308	-0.488696	-1.04917	-1.29386	0.239292	0.423948	-1.59882	-0.680885	0.929636	1.00559	-0.026289	0.158388	0.795571	0.0745886	0.582477	-0.44997	0.898695	0.675078	0.421869	-1.09901	-0.12128	0.248763	0.211087	-0.295337	-0.565905	0.291022
0.824201	-2.7834	-0.174673	0.712618	0.0595682	2.42011	-0.325076	0.196513	-0.547804	1.4263	-0.663862	0.438286	0.617891	-0.299364	-0.518003	0.653394	-0.108758	0.352024	-0.423647	0.532349	-0.590649	-0.539051	0.408101	-0.244724	1.50906	-0.324567	-0.162888	-0.295485	-1.27514	-0.534096	-0.512564	-0.17258	0.0942108	-0.297902	-0.764648	0.142901	0.341812	0.467702	0.259671	0.0320431	0.790625	1.389	-0.538658	-0.27278	0.11258	-0.221174	-0.608175	0.265057	0.372073	-0.00356526
-1.5874	-0.390343	-2.14492	1.16519	1.96318	1.52388	0.529252	0.0858514	1.1474	0.069504	0.808793	-0.410968	0.705776	0.129153	0.574148	-0.277365	-0.96251	-0.506633	-0.665169	1.87591	-0.700684	-0.584659	-0.19809	-0.818632	0.224832	-0.543776	0.166745	0.185664	0.231613	0.310479	-0.106635	-0.470153	-0.11656	-0.302046	0.412951	0.770437	-0.00163758	-0.478711	0.437382	-0.74245	0.526514	0.439283	-0.572952	-0.0421805	0.435692	-0.359351	0.156418	-0.160743	0.0545668	0.408751
-8.05819	-2.76598	1.39561	-0.0899413	1.1196	-0.0900692	-0.915249	0.165088	-0.42114	1.29285	0.931126	-1.66988	-0.185507	0.137006	-0.0954027	0.00997857	-0.565948	-0.446614	-0.80805	-1.06168	-0.0118727	0.378421	1.24554	0.281921	-0.118288	0.766531	1.10347	0.0292472	-0.257008	-0.119859	0.129117	0.619613	-0.0758628	-0.386514	0.813452	0.896995	-0.485864	0.0839217	-0.710739	0.166172	0.266655	-0.107091	-0.704002	0.387355	-0.261385	-0.213424	0.130792	-0.42101	-0.418423	0.232155
-3.94548	-1.40727	-1.31346	3.36057	0.000937571	-0.0843528	0.743154	-2.23556	-0.511424	0.329753	-0.51885	0.63837	-0.339846	0.394106	0.598944	-0.145951	-0.351015	0.607455	1.05197	-0.163793	0.226856	-0.340875	-0.238568	-0.105602	-0.0352512	-0.693162	-0.127386	-0.164332	-0.272794	-0.235552	-0.54176	-0.394253	0.368137	0.228994	0.571039	0.669933	0.741946	-0.101602	-0.311529	0.778421	1.31476	-0.102047	0.0347884	0.566389	0.3055	0.110247	0.649946	-0.145069	-0.0320774	-0.325624
2.70583	-3.71772	0.555142	1.15071	0.305284	0.496999	-0.372458	0.348024	-1.40104	1.37655	-0.609932	0.251036	2.51012	0.714901	-0.320774	1.13966	1.7089	-0.461624	0.511632	0.297596	-1.00026	0.248688	-0.495188	-0.538441	-0.793484	-0.649667	-0.45145	0.242695	0.0183983	0.0987293	0.554828	0.612187	-0.596338	-0.395726	0.258383	-0.385059	-0.522244	-0.29541	-0.452592	-0.435928	0.073736	0.171253	-0.490724	-0.633904	-0.50303	0.0919551	0.886283	0.457701	0.441842	-0.661074
4.16672	0.7158	-0.598942	2.23635	-1.15715	-0.941912	-0.872717	1.14803	-1.39855	1.09392	0.0863207	0.498676	-0.478465	-0.751883	-0.353124	0.417624	0.686741	-1.50529	0.421207	0.143382	-0.818842	-1.1516	0.798275	-1.84544	0.496389	-0.168941	-0.919568	-0.301043	-0.23714	-0.218736	0.734957	0.860212	-0.781494	-0.761848	-0.294019	-0.106499	-0.565093	0.394427	-0.0495414	-0.358695	-0.0403131	0.447779	1.16451	0.329731	0.526419	-0.703729	0.826905	-0.593281	-0.5992	0.65878
13.7195	3.43563	3.02106	0.404734	-0.539971	1.43294	0.957065	-0.507248	-2.9376	0.0994394	2.09419	0.981179	0.263404	0.272627	0.476209	0.0838127	0.977019	-0.596879	-0.404398	-0.261686	-0.854905	-0.68193	0.372799	0.0592206	-0.867921	0.548984	-0.256839	-0.617482	-0.236253	-1.17299	-0.184522	-0.0579396	-0.0335776	-0.382533	-0.623886	0.656265	-0.35224	0.0393903	0.174617	-0.365896	-0.486518	0.226798	-0.016617	0.628499	0.44497	0.251151	1.07104	-0.41304	-0.43432	0.235207
12.0385	-1.50221	-1.80978	-0.599846	0.683749	-0.305881	0.36701	0.308795	-1.61988	0.763498	0.927645	-0.568641	1.09743	-0.490279	-1.57978	0.86469	0.220176	-1.36443	0.0132291	0.678354	0.177694	-1.41027	-0.329001	0.455661	-1.33903	-1.39224	-0.0307614	0.753586	-0.459338	-0.821424	-0.402601	-0.258367	-2.24576	0.102168	0.113109	-0.0427448	-0.604628	-0.300105	0.551081	1.1711	-0.568267	0.517819	-0.719495	-0.509705	0.0390752	0.322642	-0.155555	-0.636344	-0.0483755	0.28941
-0.132538	-2.78424	-0.945298	1.13881	1.90314	2.27637	-0.245615	1.4418	-1.16988	0.0523208	-1.00586	-0.0126142	-1.2497	-0.257959	-0.0999092	0.974621	0.595334	0.613691	0.336811	-0.504847	-0.645562	0.479092	-1.32524	0.872779	0.676287	-0.0950733	-0.163387	0.0559016	-0.381734	-0.355172	-1.18336	0.26583	0.219593	-0.159189	-0.100994	-0.125611	-0.167667	-0.403563	0.477355	-0.612145	-0.33384	-0.172602	-0.122667	-0.105974	1.17339	-0.131515	-0.191802	0.679651	-0.0174152	0.241611
22.1784	-0.527704	0.963892	-3.62574	-0.274715	-0.192386	-0.338024	1.99237	2.2732	0.366366	0.0824322	-0.511055	-0.770484	0.629057	1.11786	-0.469562	0.680072	-1.09948	0.150658	0.838809	-0.0994441	-1.40933	1.02622	1.01516	-0.69989	-0.0913017	-1.02629	-0.158028	-0.209722	0.696278	0.0112863	0.823313	0.978911	0.348172	-0.3294	0.0361389	0.102816	-0.624856	0.461867	0.392225	0.609012	2.07459	1.08963	0.726621	0.896599	0.412836	-0.0861191	0.41651	0.385361	0.253098
-1.66188	-0.0648098	1.65672	2.37172	0.0394023	-0.51407	0.0497137	-0.730653	1.24742	0.118077	-1.00807	0.118999	-1.0772	-0.7209	-0.877925	-1.05783	0.0312468	0.483525	0.697618	0.21246	0.146586	1.0204	0.363242	-0.319345	0.245776	0.371618	0.860592	-0.89534	-0.866823	-0.228727	0.344682	1.05446	0.791714	-0.141886	-0.971421	-0.0351059	-0.184753	-0.967129	0.196107	0.184736	-0.347371	0.690335	0.032877	1.00509	-0.0817566	-0.0493213	-0.824088	-1.26758	-0.821789	-0.249626
-1.06627	0.278642	-1.8211	1.7508	0.628133	3.81707	0.810722	0.0998333	-1.19384	1.34094	0.616226	-1.25746	1.36782	1.16848	-0.421262	0.788952	1.4353	0.0352665	1.43256	-1.1863	-0.316686	-0.369897	-0.299079	0.155345	-0.0474551	1.15786	-0.09193	-1.66009	-0.679133	-1.17648	0.444446	0.501039	0.0386403	-1.3516	-0.238545	-0.00750794	0.965668	-0.506162	-0.549586	-0.240545	0.324507	-0.00383717	0.187859	0.588969	-0.576276	0.516422	0.0661486	0.308988	0.636521	-0.762934
-1.12093	2.2947	-0.835351	1.31261	0.271195	-0.297678	-0.973893	0.727127	-0.766429	-0.421776	0.156678	-2.57	0.554002	-0.561132	0.972049	0.23126	-1.54246	0.855198	-0.249245	-0.567018	0.460695	-1.08883	-0.374622	0.103092	0.894821	0.182837	-1.11408	0.209048	-0.768346	1.4391	0.275994	1.25457	-0.950343	-0.771614	-1.30244	-0.258475	0.121535	-0.37496	-0.90399	0.438153	-0.412819	0.625279	-0.41946	-1.02512	0.3651	0.336824	0.728448	-0.602592	-0.803096	-0.192466
-2.64044	-3.67108	-0.604694	0.987854	0.167028	-0.25106	1.43317	0.707514	-1.56676	-1.98087	-0.407421	-0.20485	-0.137898	-0.119487	0.266199	0.845454	0.303672	-0.479235	-0.161033	-1.82753	0.270029	0.0129563	-0.292761	-0.101573	0.0549556	1.04551	0.217615	0.760026	-0.713513	0.537321	0.1007	-0.0630692	-0.165448	-0.0498386	0.252373	-0.0232546	-0.408595	-0.517047	0.562692	-0.0397538	-0.258437	0.707458	0.346322	-0.30325	-0.280655	-0.307649	-1.16881	-0.631817	-0.375065	-0.392381
-1.44457	0.531225	0.444823	0.194954	-0.85735	-0.629777	0.441501	0.59284	0.29605	0.713434	0.0161256	0.101548	-0.0794918	-0.388363	-1.29467	-0.0766371	-0.600924	0.646108	0.821153	0.741431	-0.0206713	-0.425084	0.700599	0.681954	-0.430052	-0.655558	-0.240784	-1.00452	-1.20718	0.295565	-1.09655	0.502831	1.04372	-0.975022	0.575255	0.31148	-0.958823	0.396176	-0.275997	0.435318	0.0392853	0.370569	-1.24296	0.155239	0.0665153	-0.472078	-0.102201	-0.148216	0.981607	-0.13594
-2.39544	-2.44531	-0.32885	-0.426987	-0.16513	0.120479	0.615398	-2.04267	-0.708407	0.0590387	0.0798821	0.310413	-0.422672	0.889096	0.843994	1.28748	1.07689	0.683934	-0.204147	-0.497537	0.28231	0.0225772	-0.848136	-0.591897	-0.543231	-0.503259	0.365841	0.658815	0.192193	0.588869	0.019718	-1.30571	0.4538	0.459863	-0.239343	0.131534	-0.596652	-0.0430628	-0.800545	0.418665	-0.321853	0.603661	-0.314951	-0.0772246	0.148935	0.641536	-0.540176	-0.820411	0.00342239	-0.017279
1.94289	-0.450215	0.0657406	0.524958	-0.463935	-0.254943	-1.25194	0.394247	0.0666201	-0.543595	0.0509469	-1.57797	-0.0805166	-0.452048	0.260817	-0.473319	-0.607751	1.01246	-0.0925504	-0.231374	-0.659104	0.687959	0.405331	0.867092	0.180896	-0.0437329	-0.825586	-1.30992	0.0443558	0.410337	0.439584	-0.29391	-0.599595	-0.229922	0.255169	-0.349175	-0.560511	1.04303	-0.336738	0.664533	-0.781329	-0.0214133	1.068	-0.691249	0.174529	-0.782486	-0.568439	0.546707	-0.344886	-0.14807
-1.55513	-1.38397	-0.699965	1.65217	-0.347179	0.584361	0.784188	0.927395	-0.665741	0.146451	1.09801	0.0343411	0.362926	-0.454758	1.91489	1.72019	-1.93035	1.27442	-0.344094	-0.00992044	-0.719818	-0.779446	-0.43141	0.476333	0.995512	1.36397	-0.349613	-0.281575	-0.882847	-0.265009	0.160649	0.84225	-0.460402	0.264187	-0.677965	0.524821	0.260927	1.2008	-0.0839903	-0.327722	0.00832877	0.505203	-0.380864	-0.384655	0.000674363	0.457313	0.766651	0.193092	0.24469	0.051069
6.60907	0.395344	2.21582	-2.16085	-0.56234	-2.25906	-1.56236	-0.123608	-0.232323	-1.84903	-0.841504	-0.514177	-0.567457	1.52284	0.145901	1.24219	-1.08024	0.467195	-1.2483	-0.138945	0.860303	0.0233688	0.85507	-0.13609	0.233948	1.01275	-0.79505	0.675193	-1.29421	0.558446	0.562141	0.302086	-0.317826	-0.390927	1.32604	-0.612523	-1.27748	0.564014	0.147666	0.0970432	-0.518715	0.869155	0.328532	0.308949	0.00643325	0.253394	0.300464	-0.68355	0.725462	-0.308372
3.41421	0.879849	-0.0803792	0.598336	-0.65052	-0.157157	-2.17888	0.5599	-0.517357	-0.304689	0.854443	-0.0160327	0.536082	0.544892	0.496924	-0.78789	0.449625	-0.0121152	-0.962974	0.178295	0.0309561	0.450495	-0.01918	-0.150798	0.224805	-0.223571	-0.124543	-0.475726	0.194298	-0.128357	-0.488898	0.12872	-0.528694	-0.192614	0.430238	-0.565142	-0.0416444	-0.259362	-0.0260912	-1.0025	-0.404988	0.655387	-0.0844538	-0.663509	-0.122203	-0.0299528	0.365335	-0.313439	-0.255966	0.227381
5.33988	2.37422	2.2679	1.36364	-0.404763	0.656871	0.303861	-0.637194	-0.544488	-0.0312335	1.07879	-1.79193	0.909086	0.299052	1.07491	-0.722182	-0.501189	-0.383972	-0.222097	-0.330048	0.126566	-0.832617	0.469455	-0.269113	-0.980971	-0.122663	-1.21991	-0.271073	-0.0481435	0.333594	-1.41978	-0.437669	0.0760643	-0.0121085	-0.66674	-0.403783	0.309496	-0.652013	0.200707	-0.791484	0.0200801	-0.190849	-0.102637	-0.383936	-0.673079	0.295767	0.844406	0.153767	0.883565	0.603795
-5.26	-0.291946	0.722176	1.6473	2.1291	-0.940364	1.2081	0.0515687	2.23559	0.313712	-0.357914	-0.275359	-1.18336	0.755907	-0.415242	1.16104	0.497612	-0.774609	1.01133	-0.69235	-0.603997	0.887697	-0.2724	-0.205891	0.582911	0.998964	0.937255	0.694727	0.579441	-0.421408	-1.08009	-0.882758	0.942318	-0.463101	0.603952	0.91754	-0.322197	0.378743	0.452347	-1.21536	-0.330379	-0.30907	-0.29622	0.810168	0.63184	0.0715625	-0.442829	0.806235	-0.963243	0.268246
-0.857744	-0.0567075	0.484778	0.145346	-1.01599	0.254899	1.01955	1.1161	0.180802	-0.349299	0.912498	0.829882	0.418788	0.175157	0.115279	0.322119	0.471299	-0.604424	-0.786783	0.0478733	0.534767	0.35551	0.378123	0.279425	0.37031	0.502661	0.615642	0.330995	0.322441	-0.517846	0.692847	0.420733	-1.24908	0.117299	-0.37787	-0.0549181	-0.56167	-0.614949	-0.3926	0.742669	0.284056	-0.768044	-1.03572	1.21184	-0.32717	0.806482	0.626057	0.231736	0.598976	-0.451536
1.62703	-0.00758758	-1.69056	1.60637	-0.846374	0.235716	1.11016	0.276901	-0.13398	-0.714825	0.580041	-0.82776	0.596684	-0.377969	-1.65544	0.538659	-0.190731	1.06397	-1.01293	-0.212968	-0.529092	-0.632546	0.897977	-0.273612	0.815413	-0.682037	0.361869	-0.0561578	-0.726069	-0.154426	-0.502141	-0.322655	-0.398012	0.659111	-1.08319	-0.0836645	0.048372	-0.300906	-0.239254	-0.467888	-0.16721	0.238927	0.644384	-0.167327	-0.534859	-0.0459075	-0.767735	-0.804516	-0.284057	-0.784134
5.76071	1.35625	0.128265	0.0210391	-0.0856659	-0.092421	-1.88155	-0.997816	-0.730451	-0.55508	0.547098	0.54901	-1.53843	0.555978	-1.35994	0.537215	0.689588	-0.317557	-0.66683	0.969379	-0.374422	-0.343063	0.649551	-0.961498	-0.97938	-0.193613	-0.717531	0.537326	0.0411012	-1.29611	-0.543188	0.33684	-1.71922	0.188279	0.503807	1.33655	0.0300412	-0.612182	-0.430213	-0.09448	0.416842	0.646071	-0.564982	-0.701264	0.116416	0.86303	-0.330641	0.171425	-0.0448263	0.120469
-4.80027	-1.95559	-4.19566	-1.19424	-1.12181	-1.00011	-0.80146	1.23151	0.129601	-0.846937	-1.1616	-0.326514	0.0762361	-0.052007	-0.300682	0.217487	-0.288516	0.678765	0.897042	0.590353	-0.896982	0.821854	-0.484373	-0.697036	-0.705955	0.706999	0.627603	0.666091	-0.510262	-0.131884	-0.481512	0.0751545	0.91211	0.363613	0.237421	0.806746	0.851427	-0.00310229	-0.40753	0.408418	-0.267627	0.704602	0.651744	-0.502496	0.54751	-0.496298	-0.049764	0.346523	-0.401422	0.800446
-4.86074	-1.2542	-2.13106	1.68742	0.291363	-0.731192	1.19592	0.382512	0.33172	0.281518	-0.874884	2.94183	-1.68607	0.30797	0.727759	-0.644729	-0.227341	-0.665469	0.137681	-0.493406	-0.156244	-0.471684	-0.176546	-0.0514697	0.441061	0.975096	0.855442	1.34921	-0.369903	-0.516789	0.941163	-0.317538	0.636405	0.128113	-0.798417	0.367133	0.125152	-0.356099	-0.790051	0.384802	-0.0737038	-0.625288	0.143811	0.2781	-0.164101	0.168806	0.475102	0.486205	0.104744	0.143139
7.9134	0.223016	0.771139	0.813962	-0.466174	-1.14814	-0.725316	0.881442	-0.0322523	1.05154	0.0969033	0.395122	-1.02684	-0.49111	-0.167132	-0.695723	1.51184	0.168403	-0.00950682	-0.939165	-0.647098	-0.574608	1.23148	-0.0367154	-0.447846	1.51543	0.858508	0.0668876	-0.977409	-0.147228	0.154807	-0.361684	0.819967	0.174237	-0.461911	0.940241	-0.338149	0.539326	-0.50774	-0.0658374	0.259106	0.23467	-0.408476	-0.477104	0.866634	-0.260058	-0.49528	0.714436	0.539747	-0.138282
-6.33405	-1.56721	-1.40342	1.10703	0.0483801	0.130551	-0.699377	0.954656	0.214333	-0.976386	-1.74679	0.577921	-0.0462331	-0.610407	0.394669	-0.0255107	0.832116	0.388691	0.0849069	-0.482549	-0.892893	-0.311176	-0.052782	-0.155703	0.322107	-0.0883112	0.707644	-0.344713	1.03229	0.0620132	-0.568293	0.754331	0.130469	0.0919578	-1.06768	-0.216374	0.011901	0.230793	-0.333601	0.480877	0.296879	1.21325	-0.622476	-0.119355	0.409797	0.352229	-0.102658	-0.597117	0.658215	0.0406495
-0.178705	-1.21153	-0.669277	1.93978	0.641849	0.705374	-0.435512	-1.19012	2.23925	-0.936911	0.37886	-0.286026	0.169423	1.0163	-0.470708	1.9151	-0.0548124	0.177564	0.106055	-0.545439	0.275492	0.274722	-0.0487042	-0.197996	-0.395772	0.394886	1.50251	-0.326186	-0.43239	0.263835	-1.17414	0.299946	0.00522354	-0.135167	-0.596925	-0.328483	-0.112824	-0.344189	1.04003	0.464253	-0.11322	-0.653177	-0.597734	-0.188435	-0.770093	0.370761	-0.0682566	0.127724	-1.11941	0.0788766
9.86898	-1.10715	2.48121	1.08212	0.54624	1.14663	0.70141	-0.000465773	0.605858	1.43048	0.526277	-0.207455	-0.824312	-0.916494	1.00509	0.107462	1.3802	0.631137	0.758934	-0.237488	0.580333	-1.16706	-0.164524	-0.221254	-0.208517	-0.108983	-0.0330028	-0.432461	-0.211208	-0.178507	0.378361	-0.479407	-0.827098	-0.33532	0.164556	0.238245	0.775978	0.989779	0.207959	0.517437	0.982044	-0.137234	0.263559	-0.128056	0.346585	-0.838382	0.848763	-0.275644	0.568474	-0.907389
2.15058	0.192725	-1.55048	-1.69105	3.33951	-1.11186	-1.32626	0.53622	-0.719635	-0.569345	0.145698	-1.8481	0.902754	0.248866	0.327014	0.866255	0.104665	-0.521783	-0.360301	-0.202011	-1.22047	0.0723236	1.30459	0.17423	1.52692	-1.40303	0.315524	-0.201783	-0.605516	0.445705	-0.250755	0.942835	-0.052926	0.233827	0.662854	0.282044	-0.682816	-0.376374	0.563098	0.0763168	-0.334165	0.503165	0.599203	0.36273	0.434566	-0.829035	0.906446	0.0466347	-0.345627	0.438262
-2.84624	-1.29848	0.438034	-0.296754	1.42541	0.740775	1.10259	1.88065	0.666731	0.41154	-0.628459	-1.25248	0.114251	0.0133571	-0.415107	-0.306599	-0.376525	0.266099	-0.650842	-0.406315	0.958356	0.0775658	-0.51813	0.275775	-1.35437	-0.0655564	-1.58368	0.711879	0.323981	-0.0153813	-0.75814	-0.0592504	-1.07137	-1.07023	-0.32205	-0.591571	-0.18807	0.778002	-0.739285	0.0504272	-0.789905	-0.0618298	0.763667	0.168035	0.120201	-1.08009	-0.469426	0.32055	0.123833	-0.278333
1.33007	-0.584312	-0.513569	1.02672	-0.0519736	-1.04262	-0.0704041	0.35412	-0.274305	-0.151937	-0.51215	0.853551	-0.874249	0.963522	0.461872	0.85865	-0.619888	-0.545272	0.503625	0.770294	-1.66339	1.39713	-1.43699	0.585493	-0.477378	0.884177	0.0287298	0.442029	-0.140724	-1.52226	-1.12732	-0.213428	-0.00811235	0.197524	-0.0429027	-1.14029	-0.38823	0.290436	-0.334541	1.35557	0.433304	0.826238	0.744658	0.307403	0.326932	-0.118874	-0.0993114	0.252133	0.15462	-0.598953
3.42941	-1.31147	-1.70181	0.823329	0.661008	1.67794	0.612546	0.705732	-0.0591919	-0.364804	-0.991513	-0.93024	-1.27121	0.025377	-1.06118	-1.3513	-1.51424	-1.01455	0.12727	-0.855126	0.264529	-0.524137	0.000435349	-0.892936	-0.833432	-0.410439	0.883118	-0.464249	0.926621	-0.0694477	0.608385	-0.491264	0.906415	-0.798126	-0.560242	0.0183694	0.116312	1.09418	0.0456146	-0.0695608	0.12917	0.933415	-0.535912	0.378551	0.254424	0.384058	0.00968931	-0.0628988	-0.0883432	0.403737
11.1611	2.25988	3.28426	-0.658254	-1.07611	1.1702	0.667995	1.45966	-0.434758	1.63648	-0.161279	0.95997	0.811358	0.803881	-0.34463	-0.986722	1.33514	-1.95262	0.624759	-0.180779	-0.812414	0.374523	0.959185	0.0902479	0.399434	-0.348203	-0.167868	-0.786945	0.556056	-0.0164641	1.14038	-0.853834	-0.301822	0.248544	-0.163272	-0.042222	0.304727	0.0345883	-0.286916	0.185433	0.895145	1.91071	0.461803	0.210926	-1.38814	1.46726	-0.00812386	-0.458289	0.0526412	-0.246687
-2.77996	0.594527	0.881895	1.45739	-0.92698	0.488277	0.17914	0.237145	-0.265449	-0.680993	0.14899	0.868172	-0.706627	0.58072	-0.361427	1.05849	0.357344	0.0348014	-0.431655	-0.359512	-0.696923	0.136117	-0.528989	0.272688	1.02356	-0.558412	-0.890491	-0.432638	0.338143	-0.39518	-0.867191	0.158896	0.0665522	0.42474	-0.307224	-0.704904	-0.395133	-0.0487336	-1.24712	0.572993	0.5578	-0.120897	-0.810093	0.335574	-0.825303	0.689074	-0.625438	0.612878	-0.278298	0.00125183
7.16508	-0.262821	0.741658	-0.158723	-1.1154	0.258597	0.389558	0.780671	0.0445159	2.2541	0.530745	0.391864	-1.24576	-0.878792	0.195354	1.50123	0.164891	-1.01028	-1.3243	-0.407676	-1.60684	0.402552	0.0970069	0.208043	-0.318707	1.57034	1.37722	0.7254	-0.803175	0.793212	0.172664	0.417267	0.333434	-0.653551	0.224166	-0.19748	0.694395	-0.32044	-0.642854	-0.136893	-0.183035	-0.315553	-0.12324	0.3576	-0.473432	0.126745	-0.0128979	-0.664398	0.357666	-0.106425
8.16292	1.3328	0.959246	-0.266809	0.366773	-0.976317	0.321812	0.0623029	-0.35995	-0.351603	-0.14569	-0.0935184	-0.821293	-1.59344	-0.830622	1.40634	-0.872422	-0.104804	0.985073	1.50285	-0.616468	0.243562	1.07526	0.662893	0.368559	0.201954	-0.439312	0.121327	-0.537421	-0.618144	0.397404	0.333682	0.31672	0.620412	-1.56075	-0.582762	-0.266023	-0.172175	-0.3886	-0.180709	0.193711	0.471733	-0.580265	-0.759641	-1.01034	-0.0282753	-0.0798625	0.455057	0.123267	0.40294
-0.0120474	1.65954	0.256607	1.19619	0.189987	1.25101	1.17088	-0.0798085	0.478013	-0.248922	2.23934	-0.437761	-0.757206	0.451337	1.44786	-0.40308	-0.00332493	-0.527576	-0.114628	0.445618	-2.00491	-0.177595	-0.659952	0.00562312	-0.466464	0.52512	1.18644	0.151034	0.295204	-0.529897	0.0256237	0.267368	-0.751474	0.137806	-1.05757	0.460305	-0.253696	0.308656	0.264958	-0.117374	-0.0404799	-0.108265	-0.432676	0.834885	0.119651	0.476884	-0.193567	-0.133938	0.348152	0.756584
4.53996	0.830303	0.549938	-0.395706	0.541076	-0.634226	0.73349	-0.576982	-1.27716	-1.09158	0.221364	0.347064	-1.0099	-0.0842681	0.0132153	1.17373	0.464097	1.09366	-0.157108	0.320011	-0.501584	-1.41076	0.898971	-0.636047	0.0482218	-0.28476	0.136504	0.626921	-0.0883105	-1.39547	-0.64327	0.338122	-0.784275	-0.769237	0.605969	-0.220488	-0.318242	-1.37819	-0.483689	-0.241272	0.260898	-0.128863	0.282151	-0.252268	-0.328844	-0.501292	-0.30242	0.312962	-0.368257	-0.042632
2.9276	-1.09595	1.05253	-0.355801	-0.373974	0.864194	-1.70353	0.430509	-2.05798	1.14729	-0.0715176	0.788923	0.745881	0.916655	-0.319215	-0.396514	0.0681131	0.932936	0.466954	0.725592	0.495073	-1.29655	-1.44235	0.196467	0.161092	-0.117801	0.133734	-1.24874	-1.15251	-0.510331	0.908895	-0.46031	-0.405521	0.200198	0.559929	-0.0185487	-0.323734	0.329118	-0.338266	0.85678	0.68834	-0.250794	0.714374	-0.117511	-0.0366242	-0.0391213	-0.589494	0.932936	-0.28198	-0.897226
-0.0223889	-0.674809	0.327068	1.16546	1.10933	-1.5843	-0.409847	-1.52503	1.47278	0.821127	-0.247487	-1.45237	0.617044	-0.376277	-0.319356	-0.763766	-0.159426	0.0517998	0.516621	-0.314494	-1.4055	-1.35616	-0.143757	0.365574	-0.476989	0.526163	0.541589	-0.573165	-0.591056	0.127442	0.0372782	0.376922	0.00975819	-0.0040189	0.616398	-0.147188	0.272003	0.422404	-0.596561	-0.167862	0.889105	-0.224511	-0.107176	0.375939	-0.485305	0.0968083	0.315912	0.0248779	-0.0880868	0.384997
-2.95155	-2.38186	-1.57598	0.889014	-0.655722	-1.53874	1.32146	-0.28232	1.44545	-0.707149	-0.648738	0.441408	0.295284	1.13252	1.50714	0.768562	-1.25705	-0.300348	-0.128077	0.425287	-0.469588	-0.0372926	0.359678	0.299908	0.597833	0.894414	0.456882	1.24469	0.060632	-0.640821	-0.00364165	0.38547	-0.348591	-0.492269	-0.240058	-0.383832	0.360584	0.643694	-0.399462	0.45109	0.209683	-1.07195	0.163683	-0.331072	0.0987649	1.18717	-0.468154	0.701041	0.147419	-0.410314
1.97804	1.70018	-1.42895	-0.380907	-0.239643	-0.122465	-1.051	-0.276579	0.0816917	-1.42886	-0.47822	-0.925074	-0.668888	0.206366	0.399587	1.36983	0.227349	-0.45141	0.372136	-0.800678	-0.213596	1.12565	-0.0231688	0.143758	-0.513575	-1.23266	-0.328549	0.858686	0.283972	0.0332793	-1.1674	0.194745	-0.374969	0.454041	0.660721	0.385304	0.131059	-0.465297	0.482932	-0.384574	0.403024	0.53424	-0.410733	0.317132	0.357357	0.15859	-0.384853	0.787792	-0.450305	0.21755
9.65992	-0.309383	0.446598	-2.51683	0.956728	-1.16891	-1.03391	-1.72933	0.903985	1.32547	-1.84298	-0.0403346	1.18366	0.375792	-0.126556	-1.25097	1.23873	-0.212564	-1.30312	0.911899	0.424005	0.590836	-0.224219	0.679984	0.269664	0.098399	-0.788881	0.0770744	1.45064	-1.21017	0.287346	0.119014	-0.00310468	0.681932	0.284705	-1.5097	-0.624497	-0.425959	-0.39172	-0.048812	-0.521452	0.0833752	0.173466	1.63834	-0.575366	-0.703864	-0.159396	1.16586	-0.229375	-0.19745
-4.15897	2.37412	3.44297	-1.27126	1.16744	-0.709555	-0.712011	0.0620166	-1.07999	-0.469025	-1.14988	0.671587	0.351847	-0.37187	1.90483	0.136711	-0.81707	-1.32888	0.817353	1.45738	-0.06634	-2.41512	-1.30206	-0.120536	-0.259034	0.834297	1.45114	0.0327028	-1.37914	0.161741	-2.01362	-1.00752	-0.402031	0.441577	-0.141192	1.03166	-0.225534	-0.20216	0.801275	0.477321	-1.02213	-0.87239	0.473953	0.645267	-0.733818	-1.07023	0.48637	-0.0158994	-0.00533543	-0.0404714
-0.20117	-2.30676	0.824818	0.957572	-0.143711	0.166761	0.0856397	-0.575488	-1.11609	-1.01048	-0.652157	0.220564	0.230274	-1.51449	-0.999865	-0.448819	0.393384	-0.438748	-0.609743	-0.53762	0.0291962	0.771478	-0.198339	0.101423	1.20404	-0.933285	-0.0576249	0.0478647	-0.477356	0.14326	-0.752175	-0.541796	0.92558	0.573144	0.462779	0.102869	-0.382013	0.322477	-0.532297	0.103472	0.568501	0.0714955	0.338809	0.790285	-0.337749	-0.38837	-0.111673	-0.334831	-0.270042	0.697751
-4.26006	-0.106859	0.542808	-0.223294	-1.3216	0.357962	0.560842	0.796204	0.0383943	-0.546854	2.38715	-0.0434764	0.0719116	0.0523323	0.752942	-0.124772	0.85439	1.23755	-0.403515	-0.476011	0.425516	0.117624	-0.504304	-0.00562527	0.207381	0.0172539	-0.876324	0.127192	0.807338	-0.361424	-0.386132	0.080423	-0.34379	-0.868373	-0.647973	0.478739	0.0236112	0.865759	-0.165628	-0.269885	0.0340752	-0.646459	-0.272771	-0.323001	-1.17451	0.119021	-0.614813	0.00347406	0.676805	-1.52982
-1.96354	-2.08835	-1.22249	1.14112	-1.03915	-0.336126	0.530341	-0.674026	-0.76431	1.14103	-1.02052	1.65971	0.272059	0.42143	-1.07649	0.798976	-0.955537	-0.0157321	-0.405169	0.596598	0.53537	-0.530725	-0.631059	0.576826	0.342631	-0.0079253	1.26702	0.417349	1.37639	-0.234364	-0.137919	-0.667726	-0.243605	0.241136	1.16642	0.393109	0.418056	0.4475	-0.158915	-0.164792	0.0417333	-0.413828	-0.513739	-0.269936	0.194746	-0.0476063	0.606137	-0.587983	0.770531	0.125307
-3.81494	-0.225712	-0.762342	1.87053	-0.17068	1.63503	0.20625	0.253534	0.780088	0.0800162	0.672443	0.0636722	-1.15377	0.165805	-0.539258	-0.411346	-0.251749	1.42544	-0.955626	-0.291955	-0.337815	0.118958	1.24478	0.306247	1.33936	-1.40792	0.272822	-0.65974	-0.597738	1.09741	0.998238	0.316264	-0.364152	-0.4446	-0.938653	-0.257944	-0.159782	0.188316	0.414738	-0.160616	0.457009	0.920631	-1.01796	-0.7352	0.560328	0.202169	-0.0773813	0.0873903	-0.714376	-0.313712
-0.837157	-0.0860499	1.92256	0.434398	-0.911545	-0.0350889	-0.912556	-0.822127	-1.53425	1.03019	0.559835	-0.288871	0.118233	0.248913	-0.135938	0.65028	-0.0243762	-0.923361	-1.553	-0.263392	-0.693444	-0.0640876	0.456829	-1.3069	-0.441905	-0.386691	-0.913124	0.472123	-0.444341	-0.240032	-0.492914	0.0683227	0.0577664	-0.566149	0.591784	-0.476552	0.0588336	-1.06558	-0.701435	0.457943	1.169	-1.12953	-0.61973	-0.205816	0.771771	-0.124977	-0.209832	0.494803	0.254961	0.337415
-3.856	2.14623	1.54093	0.220049	-1.1208	-0.619794	-0.405047	0.23826	0.121119	1.48407	0.449695	-0.52725	0.11702	0.00524979	-0.369741	0.675457	-0.600676	-0.719532	0.597261	0.203072	0.939827	0.465944	0.45143	-1.50465	0.297154	-0.0604077	-0.399732	-0.387729	-0.108289	0.862064	0.567081	-0.819319	0.271551	-0.256496	0.750632	0.191528	0.105753	-0.578117	-0.841466	0.190938	0.00997019	-0.116496	0.304628	-0.378253	-0.434072	-1.1438	0.125857	-1.17342	0.650386	-0.36058
-1.22852	-2.76035	0.954386	1.31992	1.49264	-0.912057	-1.47482	0.915637	-0.377129	-1.0584	-0.0123946	-0.0296962	-0.0345608	-0.0123835	-0.0291399	-0.603554	-0.617027	-1.87284	-1.38055	0.32913	1.22011	-0.167122	-0.72197	-0.298361	-1.3968	0.342756	0.381798	-0.375823	-1.03828	0.0770095	0.888763	-0.154325	0.919956	-0.552065	-0.0837472	1.23524	0.0954574	0.181643	-0.439247	-0.600283	0.0642142	0.203757	0.435312	-0.237337	-0.233559	0.391411	-0.217878	-0.110706	-0.0455631	0.603239
2.10193	-0.0670586	-1.43572	-1.38661	0.594465	1.97054	0.936655	0.0369151	0.913644	0.112862	-0.821597	0.73318	0.570568	-0.0651442	0.458045	0.26096	0.388232	-1.34041	-1.35656	-0.240239	-1.27117	0.0865634	-0.556051	0.927539	0.622284	-0.928718	-0.603818	-1.05201	-0.45523	0.500297	-0.164589	-0.290518	-0.917492	0.554194	-0.481627	0.0836503	-0.316567	-0.369544	-0.485166	-0.0317663	0.527406	0.394553	-0.873853	-0.149756	-0.0344315	0.161961	0.383991	0.27108	-0.449413	0.317499
5.46561	-0.471686	-2.32121	-0.632412	0.733708	-0.680267	-0.24443	-0.28832	-0.165855	0.111523	-0.164456	-0.241752	-0.284142	0.381095	0.227428	0.522323	-1.08368	-0.399577	-0.450255	-0.663851	-0.464247	-0.548087	-0.396149	-0.622127	0.396189	-0.476307	0.170616	0.583595	-0.165961	1.29101	0.137482	-0.496336	-0.53451	0.36293	-0.141875	-1.30158	-0.819072	0.39187	0.287817	0.0167633	0.113613	0.652373	-0.119111	0.674436	0.984893	0.995042	0.4535	0.141399	1.91035	-0.51921
0.181468	-0.496189	1.17308	-0.84406	0.698054	-1.74978	-1.33272	0.869665	-0.49889	-0.459491	-0.31057	1.16283	1.24993	0.599113	-0.507176	-0.238888	0.511302	0.172899	1.17501	-0.625691	0.750836	0.0447345	-0.911598	0.78028	1.67036	-1.10965	-0.424012	-0.810876	-0.251684	0.294344	-0.414672	-0.011065	0.085341	1.05995	-0.648002	-0.662833	0.593023	0.271082	0.528054	0.836727	-0.597483	-0.314614	-0.137622	-0.145923	-0.669326	-1.28826	0.425971	-0.710808	0.140956	0.749911
4.92362	0.442961	1.73982	0.705146	-2.20812	-0.0161122	1.52969	0.155658	0.0413645	0.585983	0.919566	0.459559	-0.720594	-0.135998	-0.460429	0.987073	1.39896	-0.185816	-0.311166	0.958653	0.492588	-0.0701151	-0.194544	0.631111	0.181322	-0.845404	-0.460022	0.782828	0.0343544	0.489064	-0.410626	0.998396	0.647511	0.143992	-0.0664169	-0.0489874	-1.21339	-0.719199	0.499714	0.773945	1.33326	-0.345361	0.139484	0.0461916	0.219055	0.0735291	0.593911	0.111277	0.36828	0.248338
2.36751	-2.57242	1.47279	-2.45416	-1.94195	1.77268	1.39385	-1.91843	-0.100351	-1.41167	0.0634412	0.963685	1.69875	-2.20044	-0.51606	-0.29262	-0.478531	-0.608275	0.90666	-0.452271	-0.119262	-0.587095	-1.2833	0.253002	-0.498563	-0.919217	1.18724	0.878735	1.33375	0.848217	-1.31488	0.0720742	0.0797111	-0.600424	-1.34708	-0.104553	-2.04358	0.458109	-0.0687797	0.223649	-0.388497	-0.156514	1.31171	-0.991272	0.076003	0.434115	-0.513812	-0.662066	1.02148	0.823113
-0.678963	-2.272	-0.784105	-0.785779	1.04302	-1.10397	0.265048	-0.110052	-1.46801	-1.97846	-0.801513	0.879471	1.2488	-0.179767	1.47688	-0.443344	0.359246	0.174846	-0.894996	-0.117297	0.494033	-0.0754007	0.96184	0.460395	-0.430026	-0.146989	-0.173735	0.332976	-0.273729	0.0248375	-0.0161825	-0.390228	0.460512	-0.316411	-0.565322	-0.286992	-0.273716	-0.716314	-0.997157	-0.386215	0.370086	-0.518698	-0.243339	-0.46682	-0.616663	0.638167	-0.71212	-0.868711	-0.0382419	0.409672
-1.8885	-0.813655	-0.718975	0.107924	0.51341	-1.26715	0.951386	0.152307	0.485733	1.04107	0.501285	-0.971105	-0.719628	2.20139	-0.119766	-0.472212	2.05264	0.518995	-0.191771	0.369693	-0.335054	1.25206	-0.479114	-0.00563785	-0.162177	-0.954944	0.12219	0.0627225	-1.31466	0.662847	-0.205507	-0.392188	-0.0385668	0.0530229	-0.466509	0.626312	0.582352	1.1719	0.268664	-0.704129	-0.726477	-1.02021	-0.163741	0.274582	0.0526719	-0.364551	0.883513	0.272362	-0.25531	-1.073
-0.601717	-0.0801193	1.58562	2.22044	1.417	0.0727786	-0.643174	-0.50356	0.54114	-1.44536	-1.74182	-0.30276	0.0868557	0.48075	0.615311	0.296904	1.39498	-0.191547	-0.190894	0.965075	0.693931	0.507084	0.167757	0.242496	-0.441414	-0.691233	0.00538923	-0.219665	-0.0661472	-0.352345	-0.449685	0.0889245	-0.309781	-0.282649	0.496378	-0.1811	-0.107045	1.02897	-1.17791	-0.499131	0.0634146	-0.259326	0.633752	0.0828736	-0.381986	1.38229	0.21695	-0.855017	-0.745693	-0.248893
1.75842	1.24523	1.15591	0.55547	1.82075	0.355802	1.41743	2.59065	2.63582	0.915395	-1.09635	0.463115	0.665744	-0.136269	1.12986	-0.650457	0.799278	0.537496	0.64764	0.724259	-0.253296	0.57908	-0.740501	0.157913	0.126388	0.645473	-0.476792	-1.34632	-0.348905	0.722227	0.0666268	0.0919868	-0.567698	-0.436255	0.751089	0.190027	-0.670493	-0.508173	-1.31417	-0.317649	0.522991	0.0357544	0.283661	0.841403	-0.956681	-0.382324	0.699476	0.108758	-0.167374	0.763253
-0.533745	1.27788	-0.493714	1.73628	-1.00585	-0.326822	-0.00157956	0.0926613	0.228872	-1.28645	-0.372005	0.708613	-0.117476	-0.282104	-0.739268	0.991547	-0.281557	0.676099	0.493388	-0.568205	0.498403	0.22144	-0.753178	-0.430106	0.474328	-0.143853	0.728031	1.26474	0.445405	0.369624	0.14738	-0.0848358	0.117376	-0.996657	-0.321245	-0.014714	0.0458727	-0.534235	-0.0647094	-0.426954	0.493905	-0.858937	0.054119	-0.56334	-1.0305	-0.0686892	-0.823618	-0.0388165	-0.23467	-0.136407
-5.07516	-1.08398	2.98482	1.28078	1.09148	-0.445781	-0.519647	-1.1622	0.658435	1.52209	1.36249	-0.589195	1.60122	-0.37264	-0.26422	-0.873429	-0.383761	0.00745895	-0.903198	0.332938	0.203875	1.32995	-0.0792577	-1.47476	-0.546868	-0.329793	0.497023	0.01252	-0.339089	-0.33508	-0.450068	0.757746	0.913738	-0.667555	0.751332	-0.550687	-0.622914	0.00314317	-0.618538	-0.41579	-0.132979	-0.56937	-0.18136	0.513898	-0.519142	-0.784155	-0.17269	0.517774	0.324318	-0.189998
5.67855	0.990325	0.133797	-0.451272	1.64009	-0.960494	-0.801755	1.19109	-0.779848	-1.21813	1.1434	-0.594247	-0.0156277	0.315176	0.123644	-0.488031	-1.31715	-0.406195	0.399642	-1.24704	-0.730184	0.112406	0.784759	0.144159	-0.488904	-0.366459	0.385806	-0.463061	-1.28119	-0.470434	-0.652677	0.18759	-0.263572	0.74448	-1.04904	-0.238711	0.6089	-0.696595	-0.541762	-0.315803	-0.174309	0.16363	-0.0712403	0.0909874	0.62028	-0.141626	-0.209219	-0.563735	-0.0254377	-0.853819
-2.51768	-1.85835	-0.192902	0.582386	0.928765	-1.23532	-1.59724	0.878165	1.03387	0.51497	0.00745509	0.171928	-0.322721	0.557009	0.423704	-0.108483	-0.129054	-0.0502811	1.26217	-0.124211	0.478102	0.120211	-1.26419	0.594588	0.4725	0.854152	0.309359	0.308496	-0.867284	-0.247709	-0.502497	0.272595	0.72979	0.214247	0.626691	-0.464627	-0.678129	0.225294	-0.631586	-0.256137	-0.0554055	0.866835	0.132876	-0.486109	0.0528042	-0.653256	0.805628	0.799583	-0.605168	0.946227
-1.19635	-1.66543	0.192981	1.63303	-1.13646	-0.185335	-0.335336	-0.684226	0.909685	-0.0164287	0.157199	-1.96962	0.909763	0.428459	0.644064	-0.206394	0.0242136	0.578133	1.20328	0.24543	1.37819	-0.94541	-0.235476	-1.23716	0.45696	-0.105425	-0.632339	-0.0199602	0.498041	0.510711	0.0668068	-0.191366	0.668424	-0.101625	-0.643853	0.37685	0.289306	-0.135852	-0.962387	0.706926	0.549378	-0.459323	0.535134	-0.633086	0.0415256	0.340117	-0.338368	-0.203295	0.112712	0.703961
4.58806	2.80828	1.22448	0.845498	-1.39726	-0.0266639	-0.379545	1.61915	0.393698	-1.25754	-0.0836508	1.16449	1.56397	-2.11788	0.10428	-0.906917	-0.154717	0.434022	-0.931603	-0.260822	-0.692832	-1.20501	-1.79391	0.625872	-0.578368	0.557747	-0.34729	-0.605057	2.01876	0.0305473	-0.427374	-0.418538	0.550551	0.27658	0.107484	-0.421347	-0.297772	0.0776642	0.459636	0.0682913	0.749407	0.0150054	-0.83829	0.317381	-0.0533979	-0.0577104	0.821051	0.827419	-0.080952	0.394516
3.18802	-2.46532	-1.1072	0.475123	-0.321708	-0.753155	-0.104485	0.34838	-0.434285	-1.23019	0.166676	0.771802	0.087384	0.00547589	-1.21485	-0.201543	-0.427705	0.331809	0.192043	-0.116867	0.893227	-0.532147	-0.441319	-0.654113	0.386551	-0.701301	0.0951114	-0.857221	-0.676466	0.158715	0.0755971	-0.104251	0.178546	-0.76801	-0.368587	-0.146475	-0.342734	0.653984	-0.862158	-0.414871	0.489449	0.840574	-0.583351	1.30206	-0.685919	-0.133902	0.275614	-0.162978	-0.452784	-0.0152625
-0.797167	-2.46723	1.19786	1.89213	1.90702	0.786413	-0.322865	-0.416639	-0.748676	0.540349	0.155229	0.406136	-0.114136	-0.0928424	-0.384718	0.221391	-0.097386	-0.811704	-0.23064	-0.238503	0.110979	-1.05693	-0.501285	0.739123	-0.177608	-0.330963	0.79956	-0.439274	0.762234	-0.539732	0.472082	-0.514542	-0.180772	0.0603942	0.255366	0.267203	0.180387	1.05179	-0.633551	-0.141029	-0.139033	0.403622	0.150731	0.567198	0.604345	0.360936	-0.475219	0.559095	0.015518	0.239646
-2.11449	-0.421837	-2.39106	0.882293	1.43078	-0.400844	-0.317142	-1.80538	-0.677273	0.81217	-0.551994	0.915073	-0.100753	-1.04356	1.21777	-0.584763	1.24959	0.173336	0.497397	0.319582	-0.551465	0.116075	0.478286	-0.420439	-0.0420027	-1.66061	-0.315661	0.0436082	-0.544769	0.761263	-0.673791	-0.070568	0.335217	-0.109736	0.32645	0.263365	-0.013457	-0.302667	-0.203856	0.27471	-0.332336	-0.182935	-0.542391	0.293581	0.114805	-0.458272	-1.12319	-0.163738	-0.176124	-0.318257
1.48202	1.03195	-0.916515	1.05081	0.391567	2.72933	-0.919544	0.00729899	0.241658	0.368069	1.29192	0.763532	-0.293718	1.06542	-0.123252	-1.52466	-0.0119338	0.515746	-0.966358	-0.609149	1.4029	-0.211312	1.28038	1.12896	-0.203385	-0.0737834	0.314073	-1.06013	0.0777409	0.0443872	-1.15949	0.983615	0.032098	0.636485	0.0660468	0.432058	0.178314	0.609553	0.804292	-0.134333	-1.35659	0.0894174	-0.249615	-0.743254	-0.0680998	-0.455636	0.608103	0.429352	-0.655979	-0.726298
-5.8305	-1.87848	0.945322	0.128967	-1.16934	-1.03412	-0.082277	0.551444	0.892845	-0.464795	-0.80573	0.0204587	1.59501	0.019599	0.134721	-0.929671	-0.409723	1.54903	0.0183516	0.279613	0.144396	-1.39616	-0.785526	0.698248	0.68103	1.48779	0.0439319	-0.0108751	-0.48261	0.0977116	-0.963982	0.23556	-0.468876	-0.00900781	0.774795	1.25054	0.449791	-0.159547	1.31308	0.40736	-0.434771	-0.594042	1.03676	-1.1624	0.189995	-0.0912251	-1.14659	-0.561076	0.280319	0.382634
-0.39093	0.988582	-0.514632	-0.502378	-0.139858	0.364507	1.77409	-1.53984	-0.379452	0.360653	-0.747479	-0.558205	-0.882623	-0.674201	1.147	0.55924	0.540249	-0.58774	0.733274	-0.33257	1.27462	-0.873524	-0.351576	-1.05395	0.629215	0.512465	-0.221692	1.71891	-1.02981	0.243748	0.389592	1.02031	0.155763	-0.0285491	0.708058	0.0158479	0.159623	0.705258	0.60082	0.00756089	1.50441	-0.284416	-0.876212	0.249824	-0.368407	-0.550616	-0.12307	0.429196	0.242355	0.162652
4.37302	0.111154	-0.261776	0.618559	-1.85202	-2.76549	0.672774	-0.176209	0.660226	-0.591858	0.690487	-0.0563091	1.39865	-0.87382	0.0775761	0.688594	-0.445863	-0.36065	-0.859973	0.245913	1.30169	0.617266	-0.416786	-0.166632	-1.13642	-0.39162	-0.517647	-0.768986	0.8469	-0.44213	0.559323	-0.689363	0.812614	-1.21843	-0.689627	0.123569	-0.714045	-0.790371	0.239207	-0.281333	0.231116	-0.483757	0.622671	0.71767	0.496775	-1.74148	-0.0510322	-0.382253	-0.514708	-0.399518
2.22692	-1.92074	-0.129195	1.56783	-1.63334	-0.384794	1.5244	0.133481	0.597273	-0.153339	0.29552	-0.512932	-0.898761	-0.00585904	0.223719	-0.772873	1.53282	-0.353785	-0.137027	0.477929	-0.483058	-0.571877	0.435458	0.513319	0.245403	-0.838807	-0.181326	0.0349336	-1.13787	-0.515301	0.189672	0.295456	0.658929	-0.302802	-0.0387791	0.259301	0.274912	-0.962288	-0.0429773	-0.237056	0.126113	-0.397456	0.479728	-0.142186	0.133487	0.55277	-0.615433	1.19321	0.463473	0.353632
6.43924	-2.10099	-1.16406	-1.53915	-0.895819	-2.55003	1.53642	-0.629924	-0.918376	0.151513	-0.339204	-0.100905	0.811389	1.63068	0.99116	-0.0969998	1.27385	-2.17595	0.186645	2.10671	-0.197441	0.527628	0.505939	1.06433	0.557044	0.185004	-0.142522	-0.919243	-0.150418	1.04635	0.678609	1.4063	-0.68476	1.05281	0.131501	-0.466641	0.311064	-1.10282	0.304785	-1.07067	-0.301569	-0.418408	-0.93825	-0.425791	0.555704	0.00617474	0.455586	-0.0218859	0.409606	0.665354
-5.17674	1.47586	-1.16168	1.71973	-1.80021	0.393532	-0.334126	1.10711	-1.18346	0.167356	-0.00846716	0.781512	1.60968	0.525863	-0.328604	0.606423	0.0992755	0.920592	-0.0563368	-1.27024	0.513684	0.32634	0.784683	-0.252589	-0.647488	-0.293067	-0.00561945	0.584473	-1.60139	0.985865	0.526073	0.569465	-0.2482	0.640215	-0.888625	0.14161	-0.416227	0.280434	-0.955469	0.656072	-0.571367	-0.35329	-0.763677	0.235298	0.606445	-0.429897	0.0477616	-0.330218	-0.321696	0.50287
2.97421	0.0697233	1.81856	0.00355094	1.00611	-0.606892	0.238581	2.51448	-1.01128	0.190759	-0.79564	-1.3856	1.09536	0.398817	0.440968	0.0861999	-0.0540654	-0.471001	-0.177201	1.51899	1.09182	-0.817152	-0.727611	-0.705451	-1.85386	-0.376632	-1.19447	-0.462333	-0.318926	0.522755	-0.130993	-1.26647	0.69531	0.185296	-0.249468	0.165453	0.779867	0.139742	0.892552	-0.0779515	-0.114845	0.0723711	0.48017	0.413504	0.764463	0.744689	-0.474754	0.357791	-0.392509	0.615811
-3.20316	2.15296	3.65222	-0.0908168	0.172793	-0.112058	1.69918	0.697259	1.70046	2.16069	-0.886819	-0.6531	0.266914	-0.434766	-1.57354	2.37044	1.8496	0.573061	-0.223355	-1.24887	-0.710571	0.0389964	-0.373008	0.297357	-0.644596	-0.408636	0.64269	1.00965	-0.751333	-0.782201	1.24667	-0.0521433	0.52913	1.03249	-0.245681	0.414887	-0.852477	-0.503067	1.38826	-0.64342	0.529398	-0.303348	-0.552196	-0.841078	1.2044	-0.307968	0.263924	0.0852106	-0.928946	-1.61316
-0.428367	-3.24742	0.39482	1.04675	-1.02368	-2.12768	1.62673	1.83951	0.245653	-0.834988	-0.306809	-0.733907	-0.624874	1.20537	-0.331955	-0.38351	-1.04682	-1.19749	1.02489	-0.613063	-0.542679	0.106972	-0.0841705	-0.447631	-0.673671	1.34002	0.864836	0.057447	1.02947	0.774913	0.274308	-0.359486	-1.06863	-0.678087	0.491587	-0.0306405	-0.177991	-0.942409	1.57017	0.315867	-0.344821	-0.051296	0.644476	1.38223	0.294547	0.73134	-0.123154	-0.773148	0.144207	0.0593268
3.12822	-3.28517	1.66178	0.925419	0.160433	0.0653728	-0.835936	-0.603502	0.497703	1.5574	-0.75142	-0.222648	-0.699083	-1.01957	0.638183	1.0701	0.864727	0.458876	-1.03164	0.0527817	0.3208	-0.548879	-0.9253	-0.775712	0.31009	-0.619415	-0.366815	0.319625	-0.113228	0.440621	-0.000539511	0.520238	0.49914	-0.542876	-0.906029	0.318051	0.660386	0.0368425	0.154407	-0.717766	-0.2914	0.384699	-0.298362	0.534189	-0.162357	-0.62316	-0.526708	-0.182157	0.170092	-0.589121
5.81081	0.569628	-2.71269	0.691017	-0.00118717	0.188948	-1.07297	-1.39511	-1.95125	-1.15494	-0.0285129	-0.0589196	0.601868	-0.478566	-0.106191	-0.571475	2.26949	1.74021	0.199173	0.760043	1.06912	-0.876963	0.445399	0.328341	-0.0453199	-0.334327	0.279479	-0.31024	1.93408	0.0418179	-1.19398	0.379953	-0.606982	1.16233	0.0775943	0.400057	0.0520002	0.0879461	-0.676375	-0.2096	0.00612065	-1.18598	0.350837	-1.06969	0.609483	-0.550804	-0.245228	-0.197379	-0.877048	0.823852
-1.38618	0.645404	-1.49816	-1.45344	-1.34177	-1.14641	1.00333	-0.0293118	0.75378	-0.543197	1.71635	1.97295	-0.238023	0.92823	-0.097449	-0.373083	1.1622	0.880871	0.812462	0.0285092	-0.592155	1.59236	0.415875	-0.880658	0.617767	1.03328	0.0125719	0.113552	-0.768191	-0.711472	-0.531522	1.22333	0.476718	-0.449217	1.07039	0.899767	0.428636	0.656382	-0.587847	0.655859	-0.669245	0.97841	0.665161	-0.695869	0.391886	0.560339	0.320546	-0.213106	0.401913	0.0828295
3.46783	-3.96928	3.05544	-1.26559	0.881219	0.672783	-0.229648	-0.00325145	-0.19169	0.85341	-0.254007	-0.156424	1.24464	-1.22329	0.550949	-0.0493138	0.998418	-0.0142742	-0.859337	0.528393	0.707915	-0.188256	-0.156461	0.832221	0.407153	0.622479	0.168734	-1.43805	-0.283717	0.191959	-2.03656	0.320241	-6.06695e-06	-0.131486	0.33761	-0.517473	0.744342	-0.716326	0.866848	1.06746	-0.695709	1.297	-0.456485	-0.608998	0.403476	0.304253	0.252468	-0.112641	-0.219493	-0.238195
0.489745	-0.333083	-0.385004	-0.692055	1.48014	1.4653	-1.19417	1.64634	0.800888	-0.700773	-2.24867	1.5705	1.03017	1.86995	-1.89104	0.959822	1.2509	0.533325	0.708217	0.291264	0.420898	-0.226314	0.534537	0.350549	0.861954	0.468546	0.423036	-0.12092	0.524289	0.671906	-0.278515	0.3117	-0.198706	-0.268567	-1.04753	-0.623362	-0.0356698	-0.0593196	0.437984	1.24332	-0.285952	0.0938244	0.761851	0.236835	-0.363663	1.43483	-1.00166	0.124934	-0.438295	0.625574
5.74193	-1.28703	1.18502	0.668654	2.71461	0.341345	0.13523	0.773071	0.394271	0.15935	0.749052	-0.534888	-1.60773	-0.645179	-0.685608	0.501406	0.308913	1.21472	-0.163363	1.32942	0.746262	1.09209	-0.0505297	0.809839	0.704249	-0.0119864	0.0645329	0.405911	0.954347	0.581501	-0.680129	0.765157	-0.156311	0.94773	0.243897	-0.15137	-0.229915	0.169397	-1.13923	-0.178479	0.0835977	0.472454	1.33882	0.62597	0.585721	0.333013	0.654422	0.450426	0.0990965	-0.560209
2.76417	-0.55527	-0.666509	0.711503	-2.03803	1.1859	-0.584629	-0.130836	1.85624	0.634466	1.12766	-0.738424	-2.77901	0.359918	0.131663	0.174902	0.0864372	0.835757	-0.61521	1.25811	-0.773081	-0.275396	0.159474	-0.0666974	-0.312339	-1.5558	-0.698366	0.195321	0.0902528	1.34903	-0.335759	-0.769713	-0.20242	0.217703	1.41152	-0.195271	0.58403	0.395786	-0.387064	0.0443843	-0.0703348	-0.0451563	-0.394194	-0.434861	-0.411877	-0.477597	-0.25203	-0.374973	-0.104134	0.177221
-1.57714	-1.62553	-1.25614	-1.3767	-0.421223	-0.145685	-0.519134	-0.137381	0.606129	-0.682952	1.37152	0.101047	-0.00780317	-0.246289	0.167319	0.523112	0.0437152	0.630576	-0.0666475	1.18508	0.0349325	0.278978	-0.166065	1.03639	0.370914	-1.31176	1.10462	0.240718	-0.065171	-0.157665	-0.0437232	-0.211519	-0.845036	-0.365608	-0.32069	-0.0322754	0.09771	-0.231195	-0.237523	-0.756798	-0.069308	0.814437	0.458197	0.599398	0.0681236	-0.256589	-0.784607	0.0519554	0.993041	-0.436817
5.51812	-0.512027	1.49666	-0.948126	-1.4937	0.85027	0.998798	1.19782	1.01229	-0.0839261	1.04862	0.0727947	0.815145	0.572192	0.010468	-0.0847927	-0.274063	0.381271	-0.139285	0.146228	-0.359214	0.695302	-0.423273	0.426504	0.813248	1.15002	0.0987853	-0.368506	0.653168	-0.0409736	-0.0223578	0.217814	-1.08004	-0.235009	0.583784	-0.147105	0.74121	0.260451	-0.0199782	0.386089	-0.311376	-0.162566	0.513623	0.841102	-0.263089	-0.490397	0.11142	0.921071	0.45122	0.192491
4.46753	-2.17696	1.57469	-2.28223	0.218906	-0.0493196	-0.767546	1.64228	0.693479	1.01134	-0.126199	-0.0186468	0.42623	0.097949	0.150597	0.951007	-0.00903924	1.32399	1.37113	0.697002	-0.109507	0.137479	0.566081	-1.50275	-0.649263	-0.166778	0.667177	0.291862	0.164992	0.933601	0.1256	-1.21829	0.84068	-1.07413	-0.127092	-0.414418	0.0704412	0.486216	-0.108043	0.0024965	-0.061762	-0.00530734	-0.925855	0.351382	0.743059	-0.00500127	-0.332538	0.0971376	0.0666682	-0.25499
8.4167	1.77993	1.89596	0.526891	-0.073335	0.846566	-0.00801839	-0.153407	-0.665255	-2.12708	-1.40266	1.00958	-0.328672	0.993767	1.03374	-0.27306	0.241196	-0.32561	1.07421	0.924081	1.0118	1.1962	-0.121219	-0.186311	-0.812669	0.119305	-0.779476	0.0992045	-0.846402	0.952449	0.184792	0.263056	-0.0869739	-0.836299	0.378456	0.105374	1.14268	-0.436983	1.06157	-0.133647	-0.287698	-0.172646	0.179103	-0.124078	0.942488	0.571951	0.0724717	0.717191	0.187535	-0.435467
1.0063	-0.133517	-2.35402	-0.6801	-0.897806	0.480298	1.235	-0.445734	-0.588615	-1.54564	0.750501	0.770864	-0.252409	1.28109	-0.565931	0.400386	-1.025	-0.376795	0.267339	0.113082	-0.621147	0.903147	0.476513	-1.41531	0.383843	-0.0631158	-0.349182	-0.379096	-0.0137144	0.242785	-0.329058	0.0280175	-0.259391	0.80579	0.0235298	0.680629	-0.120011	0.838595	0.270054	-0.602708	-0.300893	-0.0703442	-0.0166467	0.936093	0.191578	0.395016	-0.681396	0.600142	0.588596	-0.013764
-2.45786	-1.17486	-1.28444	1.27616	-1.12263	-3.01898	3.21197	2.10143	-2.5406	3.08078	-0.584733	0.58236	-1.58678	1.56101	0.438935	-1.02322	-1.12421	-0.0742707	0.833015	-0.699658	-0.157593	0.0655159	0.222841	-0.157518	0.678719	0.918688	0.491171	1.35083	0.121839	0.784959	-0.178244	-0.440883	-0.605668	-0.930058	-0.406432	0.584328	1.11722	-0.395048	1.59202	0.964349	-0.0260877	0.204906	0.418603	-0.100344	-0.432822	0.589133	0.0466154	-0.165412	-0.192175	0.193683
0.19003	2.7617	0.757571	-0.794856	-1.39882	-0.0635273	0.566912	0.156562	0.865736	-0.785067	-1.1443	-0.80806	-0.23705	-1.27024	-0.0444843	-1.07807	0.570484	-0.706703	-0.695002	-1.38288	-0.843082	-0.664342	0.2713	0.595019	-0.480799	-0.380849	0.295719	0.38904	0.134784	-0.111121	0.0494601	0.345837	0.333502	2.41531	-0.419843	0.0282898	0.177215	0.500903	-0.471321	-0.619789	0.043519	-0.404407	1.11547	-0.664948	-0.344386	0.149573	-0.416324	0.227418	-0.224883	-0.715212
-5.65218	0.196088	-0.833202	0.649812	-0.83818	0.406115	-1.38979	1.01429	0.0840884	-0.249324	0.864534	-0.265664	-1.37505	0.60809	0.055978	-0.000439279	0.301418	0.91984	0.0665806	0.391371	0.0461639	0.594529	-0.35724	-1.05471	-0.518519	0.318577	-0.134722	-0.770374	0.066756	0.310943	0.791229	0.815186	-0.108414	-0.170477	-0.511761	-0.3958	1.05313	-0.777567	0.275846	0.48847	0.453905	0.017989	-0.0283695	-0.088751	-0.294466	-0.618137	-0.0237342	-0.104645	-1.20658	0.25517
1.30941	-2.2942	-0.680574	0.149409	-1.64766	-0.862264	-0.381755	0.264696	-0.628981	-1.24908	0.669647	1.77119	-0.72471	0.286893	1.3414	-0.0615039	0.157959	-0.532085	-0.479792	-0.770728	0.789077	-0.585413	0.0377655	-0.321788	0.974294	-0.298334	-0.916113	-0.529322	-0.462039	0.879992	-0.123509	0.539179	0.886261	-1.72362	-0.577352	-0.690814	0.112448	-0.551704	-0.289014	0.438021	-0.30592	0.229931	-0.590424	-0.435237	0.145366	-0.21825	0.383034	-0.521373	-0.211587	-0.955629
4.39374	0.631409	0.868353	-0.911108	-1.69108	-2.81187	1.2454	2.08943	0.544974	0.446526	-1.14831	-0.402044	1.04426	-0.941137	0.487519	0.208907	-0.0991838	1.15358	-1.31014	-0.27084	1.04573	-0.3357	0.158418	-0.57322	1.05822	0.637695	-1.62968	0.00163386	1.38611	-1.17163	-0.575655	-0.590397	0.230885	0.20944	-0.103778	1.42343	0.637681	-0.282658	0.279	0.0389431	0.350313	0.56653	-1.01009	-0.602093	-0.796478	0.375599	-0.0534655	0.44694	0.692666	-0.1104
13.0307	0.58372	2.17628	-0.72551	-0.89685	-1.99417	-0.696612	-0.187305	-1.30317	-0.944191	0.913879	-0.316993	0.529091	-0.562767	0.325139	0.754413	1.5743	1.49124	0.695931	0.391748	-0.793679	-0.216	-0.734791	-1.18817	-0.729828	-0.864544	0.3976	-0.583049	1.37139	0.18445	0.869007	1.31859	-0.0903962	0.351405	0.931594	-0.542556	-1.07542	-0.449069	-0.163815	-0.0970378	-1.14213	0.12815	-0.0394352	0.0819552	-0.391031	-0.463731	0.277023	0.451115	0.59051	-0.417639
3.66941	-0.0510715	2.89161	-0.561395	-1.76388	0.587159	-1.06405	0.852975	-0.779951	0.277441	0.374869	0.474774	-0.0417639	-0.194397	-0.316758	-1.35339	-1.74485	0.433853	-0.458265	0.817815	0.0978781	1.43302	0.289366	0.350473	0.129579	0.749783	-0.277565	0.35577	0.491109	-0.837139	0.317429	0.672558	-0.428935	-1.83141	0.676034	-0.436192	0.684146	0.0903214	-0.366177	0.0712789	-0.251061	-0.419787	-0.243179	-1.41583	0.486513	-0.0536945	1.46542	-0.478287	-0.60743	-0.618873
-5.5594	-2.57976	0.414195	1.40337	0.440626	0.305237	-0.21207	-0.301849	1.04192	-0.262625	0.3841	-0.700684	0.310732	1.53815	0.0271398	-1.41559	-0.829575	-0.222683	-0.57434	-0.0480097	-0.670715	-0.618299	-0.105199	0.146608	0.0106907	0.802436	-0.472419	-0.0163205	0.263733	-0.305055	-0.519336	-0.508443	0.298152	-0.931728	-0.23697	0.113434	-0.144281	0.0123515	0.179788	-0.759139	0.785732	0.0440828	-0.878798	-0.111423	-0.43742	0.283133	0.278638	-0.201049	-0.138194	0.257121
-3.29513	-6.00864	-0.184309	-0.728028	-0.581521	-0.861554	-0.613904	-1.08722	-0.364412	1.03327	1.90168	-0.173183	0.470952	0.0422996	0.723227	-0.0199041	-0.241516	-1.53211	-1.36606	0.236167	-0.334493	-0.804584	0.744113	1.16969	-0.158317	-0.51203	-1.62528	-0.760142	-0.0644498	0.262507	0.957402	-0.0922884	-0.119813	-0.278627	0.792885	0.0746295	-0.0767362	-1.10666	-0.848195	0.0396467	-0.528815	-0.34121	-0.0690544	-0.0800402	-0.596143	-0.261872	0.411814	0.743972	0.725439	-0.0226684
1.75291	-0.171538	1.78855	0.876646	0.755956	-1.36315	-1.35164	-0.262427	1.07583	1.16758	0.547242	0.515649	0.430988	1.97257	0.435113	0.794255	-1.26368	-0.114145	-0.215314	-0.178111	-0.333352	0.0349662	-0.61999	-0.621368	0.370631	-0.938103	0.0982636	0.13149	-0.52286	-0.164879	-0.357916	0.962075	0.0248836	-0.0129945	0.994086	0.412215	-0.462382	-0.121344	0.144669	0.1179	-0.0333821	-0.0752135	0.200779	0.144712	-0.170393	-0.108555	-0.27148	0.847079	0.513428	1.01635
3.02326	0.195193	-0.79342	-0.429567	-3.19934	-0.800218	0.172901	0.312461	-0.356831	0.00328501	-0.797308	0.750999	0.163705	-0.374672	1.47874	0.87273	-0.986313	-0.710351	-0.13011	1.93631	-0.559245	-0.595885	-0.693864	0.0643399	0.547124	0.134924	0.147503	-0.497126	0.518164	0.416472	-0.232744	-0.17255	-0.279076	-0.452088	0.484456	-0.169511	0.232786	0.00813472	-0.461059	-0.105533	-0.179081	0.440477	-0.26679	1.12036	0.224212	0.691133	-0.082566	-0.876845	-0.211053	-0.552122
2.69875	3.27808	-0.628397	1.40835	1.05614	-0.380579	1.32959	-1.20827	-0.343687	-0.539161	-0.0147851	-0.238254	-0.559305	-0.182326	-0.231101	-1.0828	-0.940732	0.343977	0.778572	0.50865	0.556538	0.850994	0.303747	-0.550954	-0.239166	-0.094994	0.871731	0.131332	0.167643	-0.457964	0.843913	-0.248904	-0.244285	0.21301	-0.454369	-0.627021	-0.770448	0.652887	-0.420068	-0.121421	-0.573185	0.140624	-0.071681	0.319623	-1.00278	-0.16514	-0.366103	0.241453	-0.0186148	-0.670664
0.245144	-1.21465	-0.199132	0.250137	0.262929	-0.732345	0.187759	1.38195	-0.0660798	0.746512	0.0984351	-0.426632	0.138656	0.653229	0.404665	0.301916	-0.342331	1.72151	-1.67314	0.354231	-0.302451	-0.624908	0.409545	-0.163146	-0.312765	0.971809	0.616082	0.899775	-0.205267	0.813572	0.339427	-0.635411	-0.598488	-0.261575	0.409008	-0.829559	-0.411904	-0.442932	0.323192	0.0558361	0.126331	-0.186149	0.0305725	0.439753	0.427772	1.27035	0.0323373	0.650056	-0.381202	-1.06925
4.56684	-0.806404	-1.78565	-1.68871	-1.4075	2.06496	0.32686	0.818869	0.47359	-0.0520576	1.14346	0.429794	-0.769975	0.304631	-0.605998	-0.358193	0.532963	0.357624	-0.524214	1.37189	-0.710279	-0.224384	-0.168859	0.483761	-1.27466	0.688367	-0.358831	-0.529111	0.289964	-0.276018	-0.378175	-0.786608	-0.264807	-0.345561	0.178367	-1.1196	0.566285	0.920608	-0.307468	-0.0600218	0.424123	0.195983	0.366457	-0.547283	-0.27067	-0.796786	-0.869679	-0.128593	0.963221	0.615037
1.75629	0.224438	-1.32455	-2.43276	-1.06475	0.595571	-0.100344	-1.22856	1.8128	-1.36821	-0.965501	-0.0253888	1.33661	0.354309	1.62131	-0.258616	1.18146	1.09565	-0.334227	0.0982504	-0.544462	-0.0763466	1.12048	-1.1567	-0.516989	-0.66719	0.262264	-1.33883	-0.853736	0.761592	0.0269892	0.148276	-0.148518	0.768216	-0.284077	-0.353199	0.74114	0.405305	-0.269451	0.270062	0.537638	-0.411462	0.032281	-0.0580369	-0.370833	0.480169	-0.809693	0.476048	-0.126818	-0.600949
0.569809	-1.26326	2.0939	0.387823	2.62051	0.755447	0.491446	0.638809	0.496879	-0.558329	-0.646936	-0.547558	0.412514	0.0154573	-1.92309	0.226952	-1.04643	0.353677	0.217893	0.474646	0.0541907	1.32638	0.495872	0.302788	0.794127	1.19656	1.15045	0.937928	-0.249963	-0.306534	-0.914507	0.110621	0.737324	-0.650675	0.690866	-0.508309	-0.20321	-0.456303	-0.0679046	-0.940288	-0.553812	-0.202033	-0.260849	-0.619318	-0.448654	-0.160661	0.647206	0.663788	0.118136	0.732724
7.49767	0.166648	1.64609	-0.929853	-1.61875	1.65222	-1.38047	-1.25691	1.43412	1.28444	-0.707603	0.641735	-1.45877	1.47296	-1.38906	0.274295	1.20884	0.108596	0.539957	1.65902	-0.0710194	-0.166094	0.964899	0.935564	-0.578181	0.25437	0.572981	1.12397	0.573669	-0.41069	0.201587	0.56017	0.299906	0.243949	0.752066	-0.664379	-0.339259	0.374712	0.590037	-0.622802	-0.510362	0.025105	-0.0581777	-0.573087	-0.224871	0.317803	0.131692	-0.159685	0.649112	-0.284009
-3.89456	0.593686	-0.719118	0.902451	-2.27547	0.688689	-0.0161062	0.337332	0.131606	-1.16827	-0.934763	1.13378	-1.07687	0.302778	0.652616	-0.470312	-0.349146	-0.631205	-0.466194	1.5163	0.0519298	1.33313	0.00706809	-0.962383	0.828315	0.00790194	-0.334547	0.0955494	-0.398619	-0.905111	0.382688	-0.24672	-0.0977359	0.903049	0.743561	-0.0247777	-0.218501	0.550239	0.408826	0.376279	-0.0736183	-0.173359	-0.371016	0.41898	-0.241969	0.0467246	0.402691	-0.0898662	-0.176431	-0.408782
-2.88692	0.873022	-1.33833	2.01639	-1.37812	-0.563201	1.88917	1.30091	1.39817	1.15016	0.193378	-0.560287	-1.16451	-0.79376	-0.382018	-0.251883	-1.00285	0.216831	-0.832885	0.949967	0.203407	-0.773748	-1.28426	-0.370897	0.601472	-1.16698	-0.450707	-0.405252	1.04362	-0.810217	-1.70425	0.258493	-0.258638	0.101795	0.941636	-0.0883307	-0.0483189	0.39498	0.349186	-0.0801584	-0.209113	-0.129708	-0.216154	0.22741	-0.964275	1.3705	-0.417283	0.0286277	0.701518	-0.0677087
1.88208	2.09811	-0.499903	-0.130026	-0.429667	1.03574	-0.837489	0.00506129	-1.58398	0.0832642	-1.67416	-0.170469	-0.0430171	0.891022	0.5861	-0.0556509	-0.573799	1.58917	0.481693	0.550553	0.519652	1.04828	-0.0822256	-0.288694	-0.728175	-0.950248	0.986051	-0.860746	0.264174	0.455609	-0.882273	1.5477	0.0367591	0.146693	-0.211782	-0.808622	-0.636739	-0.193263	1.06193	-0.0836463	-0.19148	0.301266	-0.320196	0.703088	-0.412015	0.937444	-0.0934639	-0.441196	-0.862637	0.0916757
3.43856	0.768223	2.18685	0.38625	1.85458	0.330983	-0.271243	1.7015	-0.0532321	-1.05703	0.879467	0.501283	0.684869	-0.15504	-0.543918	0.363817	-0.652931	0.877849	-0.78334	-0.7546	-0.431633	-0.510424	0.781838	0.0487853	-1.56732	-2.18974	1.63816	-0.115665	0.111151	-0.776849	0.0612061	0.271143	-0.104866	-0.492847	0.237134	-0.326215	1.555	-0.472829	0.573888	0.92205	-1.333	0.12851	1.34813	-0.409862	0.683536	0.48193	-0.970428	-0.377666	0.28594	1.02348
-3.15164	3.54307	3.97155	-1.96661	2.98409	-0.847358	1.20756	-0.457786	-0.484158	0.953113	0.414087	-0.766705	2.1547	0.130718	1.57918	1.13647	0.178308	0.493681	1.16062	0.705665	-0.246002	0.902236	0.0697671	-0.79173	0.0926625	-0.176115	0.109338	-0.383293	0.225276	-0.763424	-0.237118	0.141936	-0.539864	0.587149	-0.515701	-1.13629	1.19628	0.118321	0.696312	1.33976	0.461431	-0.142314	-1.12001	0.778573	1.18551	-1.24682	-0.0538368	-0.140514	0.978736	0.0899142
10.0986	-3.80709	2.11331	-2.32085	-0.492019	3.24738	-1.34134	2.23443	-0.535197	-0.657191	-0.111092	-0.627356	-0.52712	1.22666	0.131694	-0.116229	-0.0491966	-1.00924	0.895373	-0.242673	-0.70951	1.60769	-0.171843	-0.651717	-0.0804639	-1.05995	-0.49295	0.636626	1.39048	-0.133649	1.39642	-0.841428	-1.4782	0.218244	0.125828	0.689315	-0.643331	0.276694	0.800293	-1.26435	-0.00969116	0.00454677	-0.361937	-1.24124	-0.472207	-0.990363	-0.338091	-0.222629	0.00447194	-0.253971
0.491899	-2.26566	0.966163	1.65068	-1.23343	-0.317172	-0.376385	-0.836572	-0.913311	-1.17924	1.32213	-0.229841	1.16937	0.154144	0.318094	0.397173	-0.990385	0.711106	1.05095	0.0632261	-1.01063	-0.0968124	-0.502952	-0.425564	-0.324266	0.573763	0.479752	-0.46819	-0.378774	-0.271068	-1.14644	0.351302	0.495484	1.14665	0.331394	0.0307016	-0.336366	-0.449359	-0.953819	0.613976	0.627562	1.06307	0.930042	0.169046	-0.732507	-0.0551648	0.293335	-0.7072	0.89368	-0.0805559
-3.25368	2.51554	-2.70556	0.205264	-0.186694	0.476847	-0.798646	0.411748	-0.726388	-0.557755	-1.35381	0.317446	1.40138	-1.85043	0.50549	1.48125	2.64348	0.572076	-0.739815	-0.707047	-1.2567	1.81393	-0.194269	1.17963	0.229689	-0.10309	-1.34938	1.04888	1.21676	-1.42029	-1.29989	-0.0361709	1.15437	0.351468	-0.249635	0.350382	0.995155	-0.182474	-0.080798	0.824947	0.362553	0.745076	0.0478504	0.782759	-1.1341	0.143472	-0.241903	-0.385338	0.626814	0.70269
1.4887	-0.0407309	2.21345	1.37572	0.279344	0.398599	0.324623	-0.347336	0.575719	1.07244	-1.41817	-0.602913	0.358225	0.00407534	0.0241849	0.263452	-1.03672	-0.281099	-0.181702	-1.33295	0.471862	0.199201	-0.0910013	-1.03794	-0.0181726	0.160101	0.0192658	-0.485294	-0.987943	0.0932887	-0.569423	0.375417	1.08307	-0.136089	0.364996	0.497315	-1.45247	-0.415465	0.179758	-0.214788	-0.19513	-0.336567	0.91666	-0.648799	-0.423087	-0.0451953	0.187444	0.425841	0.220037	0.356564
2.66886	-1.02864	0.282379	0.453206	1.02938	0.694921	0.0447907	1.29938	-0.753791	1.02952	0.240417	-0.601373	0.973321	0.124709	0.572159	-0.152158	0.298483	0.903931	-0.578972	-0.318157	0.854562	-0.709136	-0.522429	0.0922317	-0.00680304	-0.174769	-1.36971	0.502286	-0.369379	0.366536	0.213967	-0.692341	-0.335778	0.56483	0.175776	-0.138462	0.603886	1.04255	0.104336	0.157778	0.396055	0.753105	-0.655536	0.0673677	0.461823	0.22369	0.273791	0.0950575	-0.409532	0.236268
2.95258	-0.928532	1.39139	2.35687	-0.188522	0.00428295	0.896187	-0.713482	-1.02315	-0.79963	0.407042	0.0421194	-0.610733	0.0291564	-0.431299	0.279412	0.595214	0.998997	0.00149669	0.469602	0.132487	0.351727	-1.42073	-1.15712	-0.912974	-0.207861	-0.420046	-0.635916	0.641984	-0.487102	0.473553	-0.637423	0.451535	0.540156	-1.39476	0.483011	-0.221221	-0.0718414	0.548988	-0.831343	-0.405465	0.555537	-0.555548	0.384316	-0.0715023	-0.465611	1.03915	0.822569	-0.275673	0.797769
3.01056	0.0440772	-1.01529	0.622778	1.20521	-0.421406	-0.523984	-0.789537	-1.98079	-1.02619	-0.589121	1.59193	0.255418	0.425814	-1.25406	1.22384	1.46844	-0.25761	0.139272	0.204973	0.827644	-0.894942	0.143939	0.791509	-1.08152	-0.572402	-0.87897	-0.564168	-0.336144	0.381372	-1.29736	-0.93097	0.284509	-0.884979	-1.05651	-0.763964	-0.532064	-0.236725	0.821292	-0.640578	-0.515434	-0.626981	0.929799	-1.0483	-0.0390695	-0.682565	0.620271	0.977909	-0.703177	-0.591685
8.19787	-0.967146	1.6926	0.0724692	-0.936965	-0.338829	1.86566	1.07774	-1.14082	-0.278352	-0.0441335	-0.597606	-0.254177	0.375465	-0.949394	0.939529	0.545059	-2.68193	-0.223798	0.28253	-0.597233	0.732927	0.235963	0.918453	0.391765	1.0136	-0.6829	-0.0481069	-0.307882	-0.164077	-0.550219	-0.576782	1.42902	-0.412716	1.44113	-0.0673957	1.1727	-0.263385	-0.320637	0.762915	-0.925787	-0.410731	0.0345742	-0.0938729	-0.057994	-0.454763	-1.13798	-0.214841	0.0262202	-0.324773
1.89408	-2.6153	0.624159	-1.35227	-0.29813	-0.581631	0.468241	0.716452	-0.0920979	0.873142	1.11688	-0.49607	-0.80682	1.29322	-0.212717	-0.24541	-0.298815	2.05455	0.127686	-0.761018	0.131395	-0.455549	-0.756575	-0.719092	-0.73226	0.901754	-0.037317	0.663458	0.858787	-0.769488	-0.688493	0.0582318	-0.815096	-0.565255	-0.891814	-0.638223	-0.571193	1.2569	0.780608	-0.267877	0.775835	1.22031	-0.709653	-0.0273554	-0.276857	0.242359	0.0749677	0.288514	-0.38816	-0.130324
5.25239	-1.75833	1.89325	1.07869	0.0409233	1.52812	-0.0312099	0.0625017	-0.178477	0.610492	0.0600629	0.829539	1.71657	0.0113123	0.270982	-0.528041	0.458086	-1.09247	-0.60553	1.84273	-0.73692	0.912127	-1.22828	-0.609946	0.0961619	-0.139863	1.26101	0.173309	0.723046	0.414644	-0.231382	0.0844334	1.19882	0.389053	-0.198184	0.402623	0.263812	-0.288779	-0.267075	-0.119034	0.167524	0.342098	0.367315	-0.730326	0.75371	0.0792589	-0.26938	-0.85866	-0.342488	-0.068409
-5.16916	-1.40884	-0.119033	-0.403428	-0.267541	0.203839	-0.756805	0.486476	-0.447978	-0.112975	-1.21576	-0.56037	-0.0301626	0.492273	0.0204268	0.681174	0.172355	0.284684	-0.39758	0.104919	0.27221	-0.261884	0.449973	0.445457	0.0835003	-0.200998	0.0899509	-0.184124	0.14169	-0.529884	-0.0737266	0.398514	0.123158	-0.793836	-0.710404	1.81666	0.401801	0.399964	0.00816685	-0.633015	0.227196	-0.732901	-0.0174338	-0.496573	-0.617647	0.219024	0.311218	0.021918	-0.373501	-0.0938045
0.022619	-1.12288	0.318351	1.52708	0.866001	1.47041	1.28628	0.996556	0.142053	-0.471234	0.149768	0.481254	0.229105	-0.826385	0.128022	0.147607	-0.150156	-0.446163	-0.216094	0.0592428	0.467046	1.22019	-0.218733	-0.416128	-0.178339	1.19656	0.397134	-0.11418	-0.3693	1.30003	-0.587074	-0.403931	-0.414072	0.448807	-0.490389	0.639692	-0.222236	0.232878	-0.174243	-0.941142	-1.15757	0.919048	0.261624	-0.335482	1.0126	-0.500968	-0.0641577	0.169558	-0.00992757	-0.539754
1.1134	-0.123724	-0.503414	-3.31771	2.16226	-0.726298	1.94409	2.56682	0.0538869	-1.08455	-1.02372	-0.220144	0.777045	-1.6753	-0.37395	-1.42805	-0.577526	-0.289109	1.301	0.804201	1.58775	0.188264	-0.393284	0.235882	1.48844	-0.147308	0.268892	-0.740648	0.643513	-0.542238	0.0550214	2.00229	0.670601	0.331539	-0.0335437	-0.712465	-0.906682	0.464159	0.479105	-0.360145	-0.282391	0.207383	-0.792491	0.027359	-0.691208	1.13694	-0.262128	-0.126676	0.308649	-0.109608
3.60605	2.27226	-2.02902	0.0534613	-0.41058	1.20717	0.295229	-3.25649	-0.0673897	1.18555	0.482922	-0.484671	-0.249565	0.727314	0.61031	2.21622	0.252594	-0.978549	0.0516902	0.230075	0.832316	-0.756768	-0.513514	-1.36654	-0.290855	-0.20384	1.03205	0.194679	0.453836	0.614441	-0.631802	0.68983	0.236863	1.04218	0.555545	0.318598	0.822075	0.32159	0.0271001	0.479153	-0.412566	0.415564	0.300455	-0.554103	0.14592	0.203278	-0.325633	-0.51712	0.0695572	0.036118
4.30174	0.000682995	0.892761	-3.87347	-0.480185	1.02831	1.29491	-0.606252	0.841466	-0.173452	0.188046	0.928257	0.791733	0.51297	0.102737	1.16234	0.918139	0.479652	0.355436	-0.684239	-1.07105	-1.83491	-0.828742	0.817031	-0.580463	-0.716415	0.510333	1.11181	-0.187668	-0.695081	-0.264642	-0.186541	-0.479184	0.415989	-0.262055	-0.357921	0.11412	0.328796	0.381008	-0.215919	1.19475	-0.0461306	1.142	0.289782	-0.538286	-0.870824	1.01205	-0.095091	-1.03443	0.664778
-6.4558	-1.42613	-2.83777	-0.339655	-1.0976	-1.81352	0.705962	1.26796	-0.253624	-0.632647	0.786362	0.0809792	-0.723673	1.247	-0.0613424	-0.49893	-0.547035	0.568977	0.0310179	0.81628	0.51635	-0.510793	-0.518414	-0.606684	-0.296478	-0.489828	-0.882253	-1.16236	0.22956	0.584978	0.408697	0.195159	-0.0139859	-0.118469	-0.512067	0.657177	1.14689	0.186927	0.397794	-0.560332	0.422014	-0.332671	0.591131	-0.637759	-0.475752	-0.299322	-0.186508	-0.327437	-0.650703	-0.773025
-8.84845	4.2626	0.0745681	1.22255	0.41687	1.49095	-0.00508444	0.77846	0.404376	0.607146	1.88334	0.54022	0.088658	-0.445359	-0.275033	-1.21862	-0.548026	0.61261	0.100251	-0.135264	1.15639	-0.185515	0.790174	0.577812	0.942112	-0.080648	-0.224004	-0.17641	-2.21299	-0.330733	-0.254087	-0.157649	-0.0366243	-0.333166	-0.264306	-0.362932	-0.559839	-0.196927	-0.672376	0.343222	-0.257187	-0.0127464	0.404422	0.781657	0.483926	-0.0358677	0.0017325	-1.08438	0.274789	1.20456
-5.05128	1.45877	0.40063	0.205843	0.40655	-0.884928	0.256437	0.364453	0.859997	-0.0991854	-0.560412	0.677063	-0.428171	-1.29652	-1.41752	0.529787	-0.641331	-0.538311	-0.260741	0.664041	0.449746	0.202352	-0.57389	-1.36927	0.0467098	0.284084	-1.04121	-0.231526	-0.459511	-0.0614365	0.37229	-0.100673	0.0443968	0.355073	0.362308	0.927534	-0.150135	-0.485459	-0.27476	-0.131379	0.572305	-0.186984	-0.973751	0.524225	1.04919	0.916189	-0.595612	-0.891789	0.204631	-0.178139
-2.35694	-1.2964	-1.39963	-0.695964	0.063529	0.409636	1.28989	1.51036	0.0718369	0.0183604	0.639121	-0.21103	1.14396	-0.459958	0.423954	0.948699	-0.711509	0.520048	-0.689011	0.516916	0.466128	0.226995	-0.112723	0.870665	-0.779181	-0.361406	-0.378431	0.816715	0.288259	0.520706	1.39565	0.233	0.0799104	1.43531	-0.93027	-0.0411274	-0.358314	-0.0316249	0.530143	-0.688749	0.185068	0.141099	0.102854	-0.247307	0.743655	-0.00274397	-0.471141	-0.238075	0.449151	-1.27429
-4.61958	-1.82986	-1.64622	-0.124988	0.149873	1.48006	1.7884	0.577576	1.50706	0.400191	-0.0655302	-0.368061	-2.25742	0.117178	-0.426554	0.786864	-0.0156629	-0.790263	-0.488176	-0.752853	-0.595381	0.567067	0.192588	0.19267	-1.31989	-1.5145	1.88981	-0.268078	0.512037	0.448087	-0.477352	0.876643	0.0273302	1.02217	0.0280871	-0.0701048	-0.198532	0.315066	-0.0463996	-0.189675	-0.00308884	-0.499944	0.601809	-0.0477147	-0.709033	-1.02998	-1.00548	-0.134022	-0.041732	-0.446655
-0.370417	0.00999178	0.934896	1.24085	0.431946	0.355676	-0.21789	1.84934	0.360961	0.795088	-0.512466	-0.163934	-0.070369	1.23852	-0.181957	-1.44562	-0.552864	0.586134	1.11173	-1.3099	0.30339	-0.992672	-0.724559	1.24161	0.212621	-0.673517	-0.444472	-0.689805	-0.0568419	0.343306	-0.134807	0.610846	-0.723571	0.112636	0.452354	-0.459512	-0.426454	0.747955	-0.417652	-0.731914	1.62423	-1.315	0.50101	0.291431	-0.532218	-0.62948	-1.04356	0.669598	0.671808	-0.220593
-1.0868	-2.28856	1.91945	2.36984	-1.46361	-0.0706026	0.666419	-0.515651	-0.407384	-1.53602	0.364774	-0.668731	-1.01688	0.263124	-0.0155857	1.08944	-1.72472	0.383703	-0.149947	-0.473382	-0.0829717	-0.928446	0.0398459	1.48307	-0.379421	-1.03257	-1.59644	-0.25648	-0.731944	0.23186	-0.177306	-0.0706441	0.612245	0.0638088	1.37935	-0.0146389	0.18489	-0.273662	1.00542	-0.116214	-0.464312	-0.0577639	-0.162017	0.510556	-0.760527	0.260617	-0.90051	0.21018	-0.894164	0.374388
3.25287	0.452723	0.820906	-0.722796	-1.13257	-1.26321	-1.35509	-0.43511	0.427308	-1.27848	-0.396168	0.741683	0.697396	0.819078	-0.139016	-0.447575	-1.11407	-0.884259	0.73836	1.05628	0.74245	-0.930634	0.369094	-0.576372	0.0392533	-0.620978	0.606109	0.752067	-0.0434841	-0.869593	-0.329842	-0.41385	-0.566015	-0.242814	0.288349	-0.409503	-0.224938	-0.426836	0.429104	-0.528362	-0.568913	1.0472	-0.767518	-0.481266	0.309178	0.258197	1.4132	-0.18465	0.161609	0.630408
-4.58961	2.79681	-0.62608	0.582702	-1.4342	0.717408	0.68386	0.715985	-1.22219	-2.0751	0.81659	-0.706849	-1.96091	-1.88715	1.19198	-0.737302	0.262424	-0.959157	1.26377	-0.231477	1.07041	0.226659	0.127456	0.0320224	0.886634	0.829488	-0.633602	0.251577	0.563294	-0.839166	0.750381	-0.910446	-1.606	0.465688	-0.0218447	0.00456334	-0.521227	0.511393	-0.80236	0.371491	-0.773761	-0.252904	-1.38546	-0.0761403	0.0458678	-0.109897	-0.150445	-0.40968	0.618036	0.86815
-0.544515	-2.15484	0.336503	1.15845	-0.356531	-0.81357	-0.703768	0.558743	-0.96055	-0.416251	-0.160222	0.722401	0.970207	0.292933	-0.384338	1.66069	0.0146475	-0.172361	0.574764	0.0571797	-0.137753	0.731358	-0.410287	0.0291139	1.31648	0.151455	0.0594179	-0.0233541	0.658495	-0.233519	-0.150212	-0.0223649	0.365665	0.471096	-0.308909	-0.411896	0.515759	0.174957	-0.252849	0.453237	0.452785	0.00800112	-0.237068	0.258922	0.773838	0.464512	0.18027	0.141844	0.0518923	0.379359
-6.85385	0.358116	1.0274	1.51046	-1.3322	-0.843512	-0.657965	0.64444	-0.558353	1.84613	0.76691	-1.31451	0.576602	-1.45875	-1.06776	1.75318	0.153704	0.653728	-0.546214	-0.250705	0.00537775	-0.836111	0.184394	0.210193	-0.360725	-0.184293	-0.0500546	-0.751392	-0.215841	0.000847852	1.18415	0.928141	-0.218552	0.934021	-0.354205	0.332013	-0.177592	0.0111457	0.506234	-0.492652	-0.821343	-1.05243	0.276095	0.2328	-0.0949361	-0.748598	0.51793	-0.620622	0.287308	1.11798
0.896604	-0.785623	3.89585	1.14896	0.331606	0.715728	0.0220022	0.114057	0.291159	0.399669	0.681077	-0.189841	1.27596	1.40797	0.2902	-0.665216	1.32351	0.684349	-0.418596	-1.51263	1.14929	0.216439	-0.687278	-1.2398	0.242815	0.861797	0.386144	1.56581	0.894659	0.313705	-0.387257	-0.0616397	0.388258	-1.35777	-0.491755	-0.807009	-0.397164	-0.681166	0.506838	0.358927	0.100829	0.828065	0.13098	-0.846006	-0.318803	-0.984217	-0.525439	0.320311	-0.0830394	-0.518944
-5.34745	-3.31968	-0.298808	-0.350767	0.0288509	1.07817	0.650557	-0.145501	1.07167	0.985003	0.278705	-1.65386	0.032111	-1.25784	-0.389308	0.161847	-1.05112	-0.754494	0.427935	-1.13259	0.247069	0.0462571	0.0201218	-0.191785	-0.396945	0.182359	0.611093	-1.11884	-0.49228	-0.0718587	-0.0036698	-0.0534159	0.0765583	-0.239364	1.39935	0.261854	-0.390651	0.694166	-0.0678625	0.324645	-0.315941	0.712996	0.454189	0.21652	0.871106	-0.129438	0.316963	-0.678625	-0.718143	-0.647221
7.36592	1.64309	-0.0989341	0.67847	-2.02689	-0.107071	-0.545825	1.13538	0.232426	0.55777	1.00969	-0.638602	-0.0808445	0.543302	0.524948	1.41148	-0.16984	-0.53735	0.580156	-0.261939	0.364889	-0.773355	-0.301416	0.596623	1.31669	-0.104655	-0.393089	1.36367	-0.979047	-0.0271507	0.547334	-0.516092	-0.398235	0.267223	0.593644	-0.3881	-0.743427	0.263607	-0.87359	-0.135012	-0.0379929	0.622257	-0.690235	-0.204998	-0.470825	-0.0623172	-0.379337	0.479874	-0.495467	0.335887
-2.77041	-2.21509	2.1982	-2.30409	1.72687	-0.778303	-0.0647538	0.294014	0.534563	2.08748	0.339346	-0.0895426	-0.575514	-1.49047	0.43066	1.07293	0.561427	-0.639268	1.29495	-0.00952812	0.727327	0.358482	-0.530829	1.23026	0.00726811	-0.947564	-0.0336273	0.10027	0.993881	0.0961516	-0.483543	0.894771	-0.0915179	-1.45403	-1.56542	0.210003	-0.183945	1.18991	0.218431	-0.209883	0.390623	0.0413417	-0.175967	-0.0461888	0.455611	-0.363803	-1.24502	0.584851	-0.875743	0.0275546
9.11171	-1.48803	1.09324	-1.71019	-0.68456	0.0343792	-1.45405	-0.00717615	2.15443	0.635017	-0.00614439	1.20685	-0.862164	-1.4012	-1.56469	0.721029	0.646019	1.25715	0.330309	0.867688	0.945341	-1.5923	1.65404	-0.583626	-0.091294	0.0423119	-0.14283	-0.0265909	0.58472	0.491064	0.595976	0.463966	0.668027	-0.216444	-0.413846	-1.0231	0.416717	0.152191	0.373744	-0.572411	-0.759624	-0.972459	0.943902	0.170768	-0.412204	-0.109274	0.959958	0.602175	0.291211	1.14963
-8.24116	-0.978997	-0.4538	0.492868	-0.77874	1.40164	0.560622	0.721428	-0.0430874	1.27466	-0.950635	0.594593	-0.240081	1.02095	0.701527	0.287691	-0.289735	-0.580607	0.0483232	0.865795	-0.350454	-0.226659	-0.491749	-0.404718	-0.467096	-0.343033	0.0712475	-0.543486	-0.490613	0.0829801	0.0422087	0.920118	-0.990197	-0.247631	0.0358526	-1.30376	0.141659	-0.722009	0.132139	-0.016317	-0.0624591	-0.550579	-0.198403	-0.404086	0.579369	-0.303632	-0.502321	0.0745331	0.199577	0.469442
-4.997	-2.46223	-0.0835981	-0.143843	0.965009	0.647041	0.1836	0.987661	1.849	-0.271883	-1.92467	2.17999	-0.199931	1.1845	-0.778361	-0.270641	0.449938	0.708082	0.246698	-0.525903	-0.358655	-0.639804	0.406484	0.00525821	-0.30117	-0.620538	-1.11476	0.809998	0.119294	0.0146184	-0.438414	0.17295	0.0691899	1.27195	0.0522973	0.130117	0.0682742	-0.548643	-0.608664	0.486003	-0.896537	-0.118753	-0.268318	-0.0624765	-1.49677	-0.420085	-0.369668	0.303609	0.640497	-0.804184
-4.98466	0.336645	0.231905	-1.01137	-1.83909	2.20892	0.734696	0.26543	-0.562382	-1.12076	0.35046	0.459698	1.2628	1.03353	-0.320367	-1.12777	0.442444	-0.41952	1.41566	1.0036	1.46728	-0.187948	1.56161	0.660922	-0.537333	-0.878479	1.37158	-0.0438385	1.96367	0.64383	-0.0947224	-0.665264	0.279649	-0.364627	-0.250352	0.676587	0.819574	-0.559226	-1.0334	-0.161023	0.592768	-0.695891	-1.02267	0.853174	0.421104	0.431811	0.726115	-0.774439	-0.639795	-0.105143
-3.02877	-1.82005	2.13878	-0.110648	0.50733	1.16734	0.0654341	0.210395	0.354585	-1.21652	-2.39029	-0.0846362	-0.0486334	-0.00467441	0.408764	1.88776	-0.425419	-0.897731	-0.409144	0.00962665	-0.781693	-0.317481	0.862283	0.770981	1.08737	-0.0855232	-1.22083	0.0624286	0.102643	0.263853	-0.000785427	0.218815	-0.144311	-0.157115	-0.76665	-0.3282	-0.155156	-0.253078	0.244919	-0.483655	0.277121	0.0598404	-0.451523	-0.0480324	0.511856	0.590754	0.124503	-0.345518	0.410187	0.140988
-1.36509	-2.12697	1.17116	-0.56454	0.0353707	-0.00088687	0.948175	0.350185	1.13014	-0.484537	0.180781	-0.303629	0.833489	0.543093	0.604515	0.852354	-0.336569	0.180216	0.334343	-0.0147694	-0.82647	0.00229228	0.53868	-0.634332	0.708857	-0.0650363	-0.682078	0.315738	0.0065969	0.0335545	0.221719	0.376039	-0.0976633	1.05143	1.05046	-0.406052	0.158376	-0.548712	-0.353231	0.54222	0.592167	-0.266375	0.258892	-0.0821062	-0.131545	0.241504	0.00809545	0.0881038	0.365875	0.0849819
2.28867	-2.65136	0.509975	0.657066	-0.166642	-0.973795	0.86035	0.597606	-0.41273	0.020929	0.0867748	0.395093	0.920692	0.030765	-1.06013	-0.772242	1.24547	0.0326039	0.747632	0.10251	-0.024034	-0.600516	0.0377491	-0.237932	1.02912	0.116039	-0.7083	0.625971	-0.876618	0.408886	0.110186	0.86706	0.130474	0.0924784	-0.165551	-1.0516	-0.987731	0.256106	1.09334	0.160952	0.301802	-0.425987	-0.0718114	0.304956	-0.208175	0.467088	1.16362	-0.894469	-0.0673458	0.130741
-6.10307	-2.34575	0.987517	0.514683	-0.85562	0.206299	-0.0701601	1.38783	0.0561025	-1.64234	-0.433841	1.52442	0.457119	-1.72727	0.0974346	1.99158	0.243171	0.486257	1.59585	-0.897473	0.748904	-2.03432	-0.220826	0.567141	0.259496	-1.2434	-0.667157	-0.0178894	-0.0699988	-0.060186	-0.268073	-0.420187	0.185248	0.203753	-0.677099	0.612352	-0.467634	-0.192894	-0.245811	0.226384	-0.37419	0.853885	0.261645	1.73548	1.35808	0.0646702	0.61688	1.17154	-0.70352	-1.37031
-6.33059	-1.51592	-2.41571	1.17164	1.08233	-0.528735	0.860886	-0.214418	0.403812	1.33862	-1.87461	0.703223	0.800253	0.913611	1.17559	1.80824	1.2019	-0.380596	0.524571	-0.470518	0.787244	0.791664	-0.0214903	0.58835	0.398999	-0.209749	1.33314	-0.0753075	-0.0898032	0.635422	1.44489	0.106544	0.219767	-0.224138	-0.430666	-0.118507	0.937201	0.929436	0.635106	-1.07953	-0.0451398	0.215989	-0.433989	0.202593	0.430237	0.509512	-0.244684	-0.556816	0.214791	-0.711021
-2.47386	0.226139	-0.362353	-0.101534	-0.778463	1.96506	0.742051	0.683456	0.517092	-1.56176	0.842875	0.716791	-0.22827	-1.28022	-0.206143	1.45153	0.194062	-0.8393	1.00553	-0.272223	0.119567	-0.207315	-0.0426669	-0.669737	0.814232	-0.816105	-0.0376037	-0.214765	-0.198775	-0.267198	-1.33086	0.495137	-0.291823	-0.504579	-0.79088	0.216926	1.06524	0.713231	-0.0548135	-1.3368	0.369244	-0.571027	-0.513725	-0.119498	0.911362	0.281135	0.0757562	-2.038	0.76792	0.0962022
0.363484	1.48261	0.523	1.23917	-0.0449254	-0.36993	-0.432113	0.692278	-0.452295	-1.50503	0.226637	-0.255741	0.219387	0.446965	-0.328264	0.0124552	0.178397	0.243908	-1.19162	-0.276078	-0.713945	-0.014957	-0.717384	0.847243	-0.239955	0.415691	0.606405	0.543162	1.22579	0.719716	-0.192269	-0.38162	-0.241007	1.29955	-1.03935	-0.214438	-0.634028	-0.539477	-0.209099	0.801593	0.338931	-1.26385	0.356316	0.680003	-0.556165	0.395437	-0.619407	-1.33233	0.104906	0.246593
-1.89718	0.016766	1.62156	0.641131	-0.950153	-0.803196	1.05274	1.29376	0.347809	0.141776	-1.08276	-1.31036	0.397181	-0.718793	0.728975	0.405891	-0.0336627	0.0640017	-0.785633	0.44611	-0.272795	0.605112	0.655401	0.896127	0.382619	-1.14861	0.747316	0.607243	0.499347	1.15359	0.0580463	0.194204	-0.499445	-0.997249	0.105476	-0.412959	-0.413106	-0.154138	0.209638	-0.32407	-0.802495	-0.677668	0.164078	-0.236911	-0.0310232	0.367912	0.000187448	0.189464	-0.194598	0.578088
1.22358	-3.85748	-0.757143	-0.436263	-0.573231	-0.164082	1.10328	1.1999	-0.649497	-0.791382	1.15226	0.37193	-0.806485	0.0328293	0.575966	-0.618028	0.363244	-0.22438	-0.725734	0.698726	0.881196	-0.249096	0.253292	-0.454958	0.285054	0.0181187	0.0722688	-0.0444529	0.0439281	0.333396	-0.770617	0.0946239	-1.08742	-0.619633	-0.763743	-0.174348	0.633955	0.519878	-0.368443	-0.593981	-0.16662	-0.410573	0.1773	-0.376877	-0.516119	-0.00414711	0.448996	1.19734	0.612636	0.159778
-3.16534	-0.87685	-1.96946	0.915258	2.07412	0.819377	1.04065	-0.121342	0.833765	-1.08599	-0.0489286	-0.449425	1.76432	-0.29006	0.542337	-0.487413	0.470748	-0.31162	-0.815742	0.00619492	-0.0903425	-0.717289	-0.145238	-0.787116	1.21039	-0.405472	0.449969	-0.150434	0.931803	0.377481	0.134994	-0.824964	-0.969447	1.12413	0.10392	-0.0520316	-0.491658	-0.227838	-1.34967	0.549326	-0.590331	-0.123714	0.27278	-0.42301	-0.590992	0.59409	-0.00984248	0.446054	-0.703066	-0.449769
-14.1972	0.831356	2.14489	0.263684	-0.760751	-1.97934	-0.119694	-0.0884147	0.636175	-0.718953	-0.0527623	0.638594	0.709681	0.822253	0.213579	-2.4268	0.290872	0.0234289	-0.626491	-0.846726	-0.050773	0.237657	0.128379	-0.491475	-0.707412	-1.44577	1.02977	0.265069	-0.12977	-0.811585	-0.776352	-1.07178	0.537398	0.0175353	1.40135	0.385591	-0.0127425	-0.495762	0.192823	-0.207271	0.38242	-0.899044	-1.40192	-0.0999169	0.338704	1.03136	0.822962	0.882195	-0.560981	0.0884861
4.9057	0.0825486	0.193574	-1.25051	-0.726645	0.289246	-0.126045	1.98008	-1.55292	1.37384	0.856142	-0.476179	-0.522848	-0.564362	0.885153	-0.871438	-0.136655	-0.947968	1.21543	-0.162776	0.987686	0.652046	0.253498	0.177443	-1.15709	0.154633	0.785601	-1.28465	0.0893927	-0.0306544	0.247922	1.44361	0.526946	0.804151	-0.185038	-0.476709	0.313612	0.268605	-0.0960054	0.0996134	0.241985	0.368333	-0.696041	-0.00291802	0.19739	0.0764761	-0.303845	-0.454004	-0.217078	-0.712716
3.90288	-2.664	-0.562461	0.804822	0.0664587	0.908099	0.717629	-0.502897	-0.353045	-0.68385	0.977238	0.245552	-0.11471	-0.259444	-1.05294	1.23189	-0.521219	-0.179427	0.769926	-0.672348	0.00210922	-1.21992	-1.70748	0.858066	0.901999	0.879973	-0.464063	-0.031782	0.235775	0.682773	-0.43322	-0.166186	0.763676	0.375833	0.627276	-1.03753	0.26683	-0.229226	-0.254798	0.176082	0.179676	0.0162218	-0.35323	0.183761	-0.307285	0.0547285	0.261876	-0.168767	-1.12132	-0.768712
6.58932	-3.81747	0.677078	-2.65076	1.75728	-1.21571	0.831843	-0.922129	0.677688	0.337802	1.54934	-1.36876	0.705005	2.07429	0.316153	0.616132	-0.505526	0.290994	-0.771572	0.449847	-0.632065	-0.190807	-0.868957	1.08965	0.792033	0.101449	0.108062	-0.818887	-0.689702	0.324169	1.38505	0.243033	0.0690241	-0.783718	0.60522	-0.56419	-0.733627	0.59791	0.126581	0.249751	-0.0918333	0.057445	0.936611	0.186848	-0.60195	0.256152	-0.180034	0.363866	0.388332	0.617904
-13.3664	-1.57551	1.77089	2.92033	-0.78419	1.6211	1.09886	-0.385052	0.0396548	0.649057	-0.901526	0.877608	0.103503	-2.30229	-0.998494	-0.0560832	0.19373	0.197047	0.790654	0.136932	0.523358	-0.912717	0.623346	-0.192411	-0.196659	0.432546	-0.0729993	0.137079	-0.304191	-0.454019	-0.245521	1.04914	-0.323326	-0.101795	0.45125	-0.431645	0.254325	1.0625	0.2567	-0.430194	-0.150544	-0.401655	-0.17294	0.0532414	-0.190678	0.273452	-0.651546	0.130088	-1.14146	0.135754
-6.79457	0.22738	-2.2546	-1.48767	-0.73608	0.919885	0.369802	0.415481	1.08537	0.79052	-2.87285	-0.0533597	-0.189433	0.251794	1.50982	0.0355382	0.504397	0.805422	-0.344344	-0.202154	0.860545	-0.535947	-0.42033	0.301501	-0.527553	0.258931	-0.509432	0.111049	-0.336013	0.234053	0.0827186	-0.41521	-0.707245	0.469075	-0.612668	0.186494	0.500038	-1.0923	-0.334217	-1.03883	0.661259	-0.128198	-1.17206	0.288392	-0.701325	-0.704846	0.530061	-0.194924	-0.171436	0.0646477
3.99879	1.12065	0.36319	0.956977	0.411573	0.145671	0.00142649	1.43798	-0.0104802	-0.789385	-0.0836918	-1.99765	-1.42352	0.769142	-0.261488	0.197067	1.76255	-0.539807	0.826514	-0.305019	0.0288631	0.960513	0.307673	-0.45644	-0.866406	-0.930577	-0.984274	-0.0373719	0.256014	-0.480431	0.194746	-0.0594041	0.0453687	0.420034	0.776325	-0.122168	0.268199	0.779722	0.188829	-0.929425	-0.331609	0.775407	-1.21172	-0.877894	0.143495	0.583808	0.0739097	0.722888	0.312379	0.41938
-3.87861	1.5072	0.54883	2.4342	0.631704	-0.0954543	1.56373	-1.51221	1.31702	-0.465682	0.30464	-0.0255445	-2.0148	-0.529042	0.255159	1.60222	-1.24176	-0.148681	-0.32701	0.66067	0.115326	-0.30886	-0.0325265	1.89471	0.850076	-0.00368748	-0.0280039	-0.153622	0.639506	-0.928421	2.26366	0.39542	0.653357	0.220936	-1.14978	-0.529372	-0.403837	-0.16209	0.171441	-0.251874	-0.409918	-0.145149	-0.00291333	-0.439651	0.103746	-0.462744	0.111943	0.476175	-0.144431	0.234751
1.6534	0.381895	0.0850688	-1.46555	-0.478228	-0.265179	1.20057	-0.661186	-0.675922	-0.481749	-0.221071	-1.50541	0.0309241	-0.316224	0.226015	0.922627	-0.0248905	1.2884	0.214448	-0.461182	-0.454046	0.518934	0.121345	-0.476086	-0.0311231	1.41359	0.184446	-0.795453	0.637278	-0.254253	-0.105752	0.381603	0.133862	0.767415	-0.183424	-0.512163	0.466043	0.456093	0.576261	0.0590968	-0.607969	-0.105058	-0.265867	0.56096	-1.01017	0.363703	0.903616	0.166528	-0.774891	-0.228977
9.28034	1.12423	-0.724392	-0.468022	-0.752285	0.839601	-0.00931583	-0.63317	1.65888	1.78073	-0.0982337	-1.22656	-0.373557	0.503941	-1.61377	-0.83048	0.482312	0.122046	-0.187631	-0.0271089	0.407014	0.102759	0.0481649	0.63834	-0.309071	0.283171	-1.49002	0.759314	0.206847	0.43515	-0.367177	-0.113427	0.784899	0.184115	-0.900279	1.0487	-0.208612	-0.826753	0.192945	0.342591	-0.283733	0.219434	-1.00818	-0.758728	1.07673	0.000483675	0.0608491	0.526965	-1.06199	0.344736
-5.59514	2.23225	-0.315351	0.0214777	-0.7383	0.296292	-0.0622807	-0.339458	1.47329	0.157099	0.00510792	-0.710197	-0.292187	1.49172	0.480887	1.02742	-0.0215795	0.579769	0.0191759	-0.996374	-0.227571	1.58786	-0.226553	-0.328755	0.243708	0.329104	0.732293	-0.128404	-0.894055	-0.360117	0.0059339	-0.191158	0.32504	-0.385942	-0.527413	-0.145266	0.290312	0.277083	0.182262	0.229935	-0.277166	-0.0942987	-0.522553	-0.783462	0.734286	0.370072	0.21697	0.926098	-0.282729	0.904439
1.57224	-0.161595	0.0592139	0.0633752	-0.0995213	0.618398	0.690393	-0.359768	-0.0561918	-0.241407	-0.0291084	0.355085	0.658967	-0.371836	0.526109	0.363143	-0.355536	0.241776	-0.0760013	-0.446218	0.259596	0.206098	-1.26278	-0.328393	1.10981	-0.83781	-0.526776	0.135701	0.44878	-0.0736599	0.6625	-0.114741	1.24172	0.0248214	0.400785	1.04796	0.671372	-0.493358	-0.114895	1.01606	0.591198	0.175073	-0.458924	-0.0735934	-0.083064	0.127944	0.0472772	-0.197221	0.913156	0.149403
-6.67303	-1.20126	-0.114725	1.70766	-1.26427	-1.73344	-0.266077	-2.5283	1.58471	1.15053	1.07345	1.68442	1.9775	0.177951	0.971062	0.106188	-0.0604277	-0.187903	0.961065	1.00504	0.0882398	-0.769234	0.133493	0.597543	0.527169	0.384062	-0.406345	-1.23674	0.361498	-0.202308	0.395243	-0.602834	-0.0567057	-0.877498	-0.321547	0.916379	-1.14758	0.470395	-0.0402402	-0.512546	-0.138541	-0.990419	0.663915	-0.509507	-0.151007	-0.186945	0.0541155	-0.376155	-0.624113	-0.177916
2.23978	2.07673	-0.636575	-1.06977	-2.43687	0.187084	-0.302183	0.0561632	-1.19043	0.830683	0.791459	0.0497488	-0.263073	-0.3999	0.498188	0.623559	-0.677388	-2.46873	0.264345	0.784208	-0.585528	0.376888	-0.139028	0.537665	0.565227	1.08527	-0.639198	-1.49173	-0.747503	1.00091	1.14463	-0.671194	-0.172119	0.105368	-0.45556	0.281732	-0.428799	-0.581335	-0.495179	0.0978975	0.219137	-0.203284	-0.460598	-0.800457	0.341139	0.881547	-0.707819	0.771876	-0.504845	0.0154711
4.69315	-1.10576	2.22513	0.721633	-0.408634	1.46524	-0.0990635	-1.9826	1.37728	-1.71321	0.077355	0.103184	-0.880762	0.641066	-0.138817	-0.274844	-0.864661	-0.93009	-0.834914	-0.327035	0.327146	0.0767638	0.348921	0.475619	0.280749	0.439098	-0.712411	-0.436817	-0.63379	0.0128962	-1.32586	0.788039	0.221482	-1.14153	-0.393307	-0.202766	-0.130607	-0.248427	0.0201389	0.811357	0.208286	0.144221	0.460663	-1.00002	-0.608724	0.0807392	0.324951	0.289331	-0.198824	0.298441
2.56443	-0.368355	0.331853	0.482598	-1.10079	0.655346	1.34207	-0.00116932	0.442362	-0.348806	-1.30761	0.71742	0.978773	-0.232389	-1.42451	-0.934714	0.0325796	-1.19149	0.333429	0.404547	0.897034	-0.309574	0.195134	-0.832677	-1.16061	1.14714	-1.80936	-0.450204	0.666827	-0.0403123	-0.0372136	0.702374	-0.277023	0.233288	0.383697	0.0755489	-0.743159	-0.120005	-0.207488	-1.00792	-0.164741	0.269759	-0.566055	0.0158103	-0.220642	-0.849926	-0.769447	-0.289584	-0.103433	0.500235
-0.251082	1.85621	-1.24497	0.353155	-0.693444	0.773704	0.329939	-1.4015	0.0782933	-0.940954	1.50427	-1.76215	-0.454695	0.35983	0.465415	-0.0441644	-0.716564	1.07276	0.0674803	-0.133371	-0.515716	-0.868106	-0.125063	0.558954	0.305218	0.189742	-0.989716	0.604408	-0.177562	-0.0548763	0.396969	-0.0558765	0.252859	0.0673619	0.163218	0.524411	0.647785	0.206958	0.619733	0.291177	0.103396	-0.0772701	0.497625	-0.715671	-0.702602	0.700495	-0.155699	-1.59327	0.082201	-1.00517
0.213808	0.941884	2.33928	0.201662	-0.955829	0.301693	0.566437	0.111873	-1.59441	-0.212218	1.65672	-0.677128	-0.639691	0.745937	-1.4517	0.443748	-1.32926	0.433808	0.163831	1.05151	-0.645957	0.411474	0.224813	-0.169151	0.566327	-1.19657	-0.351954	-0.50896	-0.918827	0.47325	0.53915	0.136304	0.172766	0.314126	-0.405096	0.763812	-0.640291	-1.70993	1.32209	0.012673	0.432187	0.280864	-0.0228789	0.859905	0.863374	0.156268	-0.567242	0.0484922	0.798156	-0.0636675
0.516208	0.726083	0.629138	-0.610845	0.256292	-0.136294	0.410933	-0.317956	-2.21087	-0.536514	0.490118	-2.8639	-0.626615	-0.0222942	0.178777	-0.614842	0.172174	-0.0824276	-1.73139	-0.119532	-0.0242922	0.0515537	0.326624	-0.101584	0.904877	-0.614916	-0.21808	0.096611	-0.837348	-0.131753	0.754	0.224392	0.342237	-1.1462	-0.546442	0.254862	-1.23512	0.474434	0.568023	0.38059	0.197429	-0.463899	0.877108	-0.524987	0.209969	-0.121526	-0.299378	-0.0147047	-0.0313054	0.360602
-2.10721	-0.904325	0.367548	1.03728	-0.642409	-0.399365	0.509895	-1.11847	1.78678	-0.435597	0.595227	-1.34778	0.468295	-0.124914	-0.516225	0.806007	0.810791	0.182414	0.0135347	1.38923	-0.583304	-0.397772	-0.122547	0.0630501	1.01397	1.09742	-0.00341075	-0.181259	0.201097	-0.816241	-0.85652	-0.693279	-0.462481	0.712426	0.0300579	0.227631	0.426603	-0.149417	-0.148823	-0.785255	0.610214	-0.65816	0.390048	-0.227825	0.470663	-0.113391	0.380587	-0.161248	-1.17244	-0.643245
2.02377	1.16245	0.55056	0.600551	-0.212067	-0.859134	-0.519458	0.536011	1.68878	-1.13379	0.181464	-0.843269	-0.845008	0.0986261	-0.601233	-0.581202	0.804342	1.76842	-0.00221338	-0.511497	-0.358307	-0.910961	0.643034	0.570364	-0.576985	0.642014	-1.23097	-0.0470035	0.63352	0.803705	-0.217964	0.173942	0.743256	-0.702163	0.619969	-0.577308	-0.00843453	0.257765	0.469718	-0.0181082	0.417413	0.0219266	0.650669	1.89957	0.341998	-0.950997	-0.00765449	-0.592857	0.32819	0.775607
5.99918	1.32777	0.569392	-0.586998	1.64669	-0.040238	0.564862	1.41178	-0.425456	-0.173245	0.321288	-0.0625317	-0.454381	-0.340305	0.378035	0.640159	0.0747103	0.0543478	-0.940309	-0.639651	-1.30148	-0.715089	0.0699089	-0.724936	0.642982	-0.46555	-0.693274	0.474891	0.277014	-0.0712495	-0.829842	1.45246	0.315317	-0.962852	-0.513643	0.760516	0.438338	-0.177653	-0.315741	-0.323093	0.763436	0.586779	0.380863	-1.08815	0.432708	0.440147	-0.231696	1.18234	0.451103	-0.0123593
-10.7368	-3.54436	0.596611	-0.391392	-1.02421	-0.0399134	-0.133158	0.59183	1.21653	-0.177559	-0.595281	-0.754737	0.122733	1.78878	-0.718442	-0.0401234	0.661458	-0.988749	-0.724442	-2.33844	-0.128704	-0.428864	-0.199985	1.1836	-0.199282	1.12576	0.575893	-0.173049	0.799174	-0.943887	0.0385567	0.55361	0.418334	1.17838	-0.140754	0.231462	-0.184819	-0.455001	0.119899	0.414987	-0.0662207	0.0478521	-0.082578	0.122064	0.299581	0.684107	0.458572	0.573862	0.00187796	-0.299976
0.754094	1.62782	-0.114751	1.46702	0.555185	-0.785097	-0.403141	-1.08443	-0.351188	-1.88488	0.733392	-0.406977	0.436526	0.059335	0.651352	0.383502	0.0613235	0.242946	-0.181754	0.918175	0.18444	-0.831424	1.36493	0.155521	-0.2273	-0.15908	1.05413	1.32753	0.640614	0.544757	-0.0611874	0.787484	-1.25259	0.576739	-0.665202	-1.38389	-0.643334	0.407806	-0.499625	-0.452565	1.85547	-0.0136092	0.354045	-0.143792	0.485415	0.665675	0.45571	-0.103876	-0.0742598	0.296824
-9.96966	1.38908	-2.14478	0.170395	1.34326	1.59897	-0.646769	1.71094	1.43883	-0.645393	-1.28824	0.518641	1.23095	-0.262467	1.2145	-1.29019	0.295935	0.0948912	1.83977	0.545466	0.565624	0.20072	-0.375779	-0.609517	-0.657721	1.13745	-0.291149	0.347196	-0.581345	-0.0724842	-0.121209	0.533586	0.726142	-0.627064	0.425985	1.08223	-0.0123366	1.94145	-0.119421	-0.819064	-0.180536	-0.365421	0.146217	-0.306978	-0.18044	0.126998	-1.24095	-0.439244	0.389145	0.417978
-1.38694	3.7383	-1.84787	-1.57624	-0.111834	-1.5814	0.340737	0.032867	1.17301	-0.18648	-2.11552	-0.360404	0.22895	0.244962	-0.527159	-0.401156	-0.425133	-0.46552	-0.143072	0.0925306	2.02996	-0.805732	-1.20227	-0.668861	-0.0556748	1.2616	-0.288906	-0.473551	-0.1264	-1.08355	0.136916	0.439466	0.38807	0.198348	-0.241903	0.244963	-0.103182	0.398396	0.604805	-0.876316	-0.427006	1.34926	-0.0705396	0.283535	0.94545	0.314791	0.765953	0.26074	1.02605	-0.471635
1.12173	-1.10635	-0.437454	-0.393951	1.16506	-0.359112	-1.07851	0.443788	-0.483893	-0.651544	-0.391383	-1.31663	0.888153	0.76654	-0.47993	0.618094	-0.601512	0.502641	-0.298142	0.0394313	1.68805	-0.352019	-0.126109	-0.270935	-0.766642	0.169741	-0.887801	-0.354348	-0.695684	-0.233862	-1.20056	0.125508	0.408271	0.158131	0.791319	-0.0433224	-0.180949	0.568885	0.362474	0.011382	0.161704	0.0516324	-0.164344	1.39897	-0.659816	0.601994	-0.166297	0.559946	0.888399	0.0651665
-8.0426	1.4179	2.94147	1.56818	-0.116327	1.34644	0.708758	0.0176918	-1.27633	-0.875714	-0.931553	0.00899988	0.737431	-2.44071	1.36784	0.73434	0.213929	0.0719955	1.36816	0.632108	-1.13196	-0.243602	1.05082	-0.698839	-0.0947146	0.0537734	0.252011	-0.155913	-0.578535	0.420146	-0.950916	0.464048	0.264262	0.469082	1.46491	-0.618953	-1.40894	0.629754	1.34232	-0.174881	0.650539	0.0131963	0.0550252	-0.488134	-0.461458	0.572864	0.544293	-0.236733	-0.521368	0.594919
1.768	-1.33475	0.0989524	0.0766805	0.254488	0.933809	0.266007	0.255458	0.661926	-1.18905	0.233516	-1.01126	-0.185646	0.919772	-0.0428452	0.120343	-0.0831344	0.637014	0.678402	-0.0999172	-0.387125	-0.817879	-0.320265	-0.114278	-0.614005	1.03982	0.536629	-0.0579656	-0.127583	-1.0762	0.96698	-0.330114	-0.331122	0.0158344	-0.555697	-0.318708	-0.34434	0.388271	0.0216151	-0.859538	0.558478	-0.368582	0.0722728	0.194587	0.458822	0.545349	-0.669406	0.390625	0.32983	0.170048
-0.892329	0.652602	3.27549	0.315439	-0.917653	-0.164548	-1.01435	0.159733	-0.969964	-0.34692	0.315954	-1.20115	-1.23726	1.0275	-0.19629	-0.22063	1.11508	0.18962	0.991323	1.8476	-0.715333	-0.516147	0.165035	0.399912	-0.0694323	-1.06232	0.172473	-0.910057	-0.193721	-1.18584	-0.488393	0.460656	-0.283203	-0.369884	0.0379002	-0.788045	0.195656	-0.688115	-1.46584	-0.126676	0.148894	-0.23795	0.798796	-0.555981	0.0881946	0.585437	-0.284418	-1.20003	0.285454	0.243438
-6.79582	-0.723495	0.225587	1.23714	-0.781057	-0.747872	0.105251	0.0295655	-0.0913959	-0.144649	0.491441	-0.681787	0.217474	-2.03583	0.0409013	0.568063	-0.904768	0.443623	-0.917833	0.203369	1.18565	0.166447	-0.379623	0.0414353	-1.02421	0.581677	0.237273	0.477165	0.77942	-0.0250585	0.00819999	0.269817	-0.380064	1.40494	-0.536777	-1.15311	0.110194	-0.746	-0.136726	0.30258	-0.185054	-0.00553766	0.356983	0.57632	0.910632	-0.110562	-0.422973	-0.138492	-0.497798	-0.140091
-3.04177	-1.04625	-1.55747	0.239717	0.690618	-1.53197	0.604814	-0.242753	0.553483	-1.00528	1.65947	0.606956	-1.74847	-1.13002	0.967978	0.395939	0.452911	-0.175878	0.0187203	-0.731897	-0.621983	1.15765	-0.774244	0.309357	-0.577218	0.107597	-0.247708	-0.595689	-0.698456	-0.400479	-0.0536553	-0.119821	-0.20217	0.677943	-0.13802	-0.324716	0.50882	0.827226	-0.34996	-0.48872	0.123658	-0.361004	-0.0104359	0.560186	0.477103	0.248249	-0.447682	0.20988	0.556685	-0.0851781
-6.55913	-0.320735	-0.416386	0.277029	0.532827	2.44851	-0.427134	-1.55688	-1.61516	-0.380696	-1.28433	-0.944731	-0.215837	-0.341276	-0.260748	-1.35766	0.681712	0.350834	0.0321887	-0.461335	0.397429	0.0837885	0.706166	-0.421194	0.211124	0.497921	0.522621	0.556768	-0.69464	-0.16936	-0.462392	0.358021	0.446384	0.320101	0.136423	-0.438316	-0.468293	0.351226	1.25862	0.10566	0.157101	-0.582459	-0.718754	0.778098	0.0914164	0.214282	-0.33807	-0.172674	-0.394391	-0.718723
0.389844	1.25841	-0.541514	-2.43521	-1.15351	1.10742	2.54866	-0.383042	0.578541	0.465591	-0.319442	2.14899	0.569483	-0.387291	-1.16902	-0.114505	0.953542	0.0593458	-0.909309	-0.870278	1.67185	0.0611669	-0.907338	-0.146169	-0.338191	-0.0690915	-0.210392	0.641298	-0.255683	-0.331772	-1.15876	0.552041	-2.08626	0.148762	-0.540761	1.12245	0.0691424	-0.043078	-0.192522	-0.146953	-0.0139969	-0.841229	-0.343851	-0.111785	-0.0975363	0.206274	0.750539	0.12836	0.269641	0.357771
-3.4181	-1.30551	0.716339	-1.96735	-1.55109	1.20637	0.962534	0.501287	0.162654	0.680942	-1.88332	1.31074	0.535589	1.98281	-0.0361813	-0.0101495	-1.4639	0.962013	-0.0304492	1.16293	-0.107387	1.28969	0.295299	-0.377701	0.513771	-0.77082	-1.01848	-0.229682	0.746398	0.19454	-0.0236329	-0.5561	-0.556335	0.639787	-0.676145	0.800012	-0.443038	0.234326	0.0693887	0.700725	0.869717	0.0705862	0.985167	0.439048	0.345063	-0.00971021	0.00160956	0.113307	0.47013	-0.0358726
-5.51967	-1.409	0.214666	-0.232163	0.400331	-1.18347	0.106365	-1.39673	2.1088	-0.345393	-0.255375	-0.877534	-0.164045	1.19813	-1.17668	-0.230979	0.552014	1.17681	0.11279	-0.323176	1.97937	-0.570232	-0.219794	-0.733787	0.0338216	0.654877	0.278277	0.368766	-0.519974	-0.0798949	0.495897	0.830244	-0.64919	0.818101	0.141944	0.178667	0.0629776	0.133869	0.355823	-0.470904	-0.745431	-0.259202	0.426592	-0.0322346	-0.0607309	0.262459	-0.145839	0.0572774	0.549089	-0.117018
1.00923	-0.89934	1.48474	-1.15299	-1.50632	2.27297	1.4035	-0.358039	0.14518	-0.622629	-1.27141	-0.232561	1.55755	-0.636887	-0.821276	-1.13486	-0.151606	0.125901	-1.13598	0.724599	-0.401716	-0.367846	-0.489557	0.527583	0.0180291	0.789492	-0.103513	1.04758	0.259305	0.328891	-0.118958	0.448451	-0.527599	-0.298539	0.23425	0.0397197	-0.233661	-0.125653	0.396156	0.378779	-0.442088	-0.400849	0.72988	-0.3135	0.984676	-0.745513	1.07772	-0.453941	-0.100325	-0.160033
6.51245	0.435056	-0.228088	-1.72738	-1.52795	-0.446793	0.215065	1.02341	-1.02839	0.303753	-0.0684035	-0.496043	0.470349	1.07322	0.00834895	0.871335	-0.691369	0.547698	0.259926	0.20218	0.190568	0.139836	0.349411	0.318254	-0.953818	0.69675	1.23904	-0.158133	-0.471673	-0.387245	-0.0779429	-0.199116	-0.266256	0.946363	0.677426	0.0909691	-0.00352832	-0.225336	-0.0613477	-0.504668	0.178715	-0.224384	0.0659577	0.585933	0.162922	-0.38542	0.446837	1.03257	-0.0560041	0.234545
-0.532953	0.961288	1.72155	2.0966	-1.45716	-0.299427	-0.360456	0.343657	-1.82941	-0.392726	0.110298	1.28354	-0.696181	-0.863864	0.86726	1.38512	-0.56622	0.307364	-0.523296	0.593318	-0.24915	1.30079	-1.06246	0.666821	-1.85141	-0.0432283	0.536267	-0.478931	0.268323	0.317953	0.848105	-0.587215	-0.426515	0.00309003	0.536086	-0.202116	-0.831697	0.9916	0.587004	-0.142913	0.2373	0.125649	0.369593	-0.0530825	0.442026	-0.244948	0.548559	-0.777789	-0.403065	-0.761529
-6.9246	0.734853	-1.07318	-0.0141972	-1.48455	0.18671	0.138967	0.619278	-0.293934	-0.166219	1.46946	1.82459	0.159528	0.234512	0.690798	0.764212	1.70459	-0.125647	-1.48259	-0.6174	1.76976	-1.0073	-2.15335	-1.33376	-0.13215	0.386977	0.0570924	-0.322176	-0.409229	0.283338	1.08031	0.585581	-0.379454	0.167241	0.323421	-0.22939	-0.626239	-0.295139	-0.349911	-0.597531	-0.786101	0.0753557	-0.117065	1.35828	0.369989	-0.0993514	-0.382003	-0.157414	0.559609	-0.163847
-8.17172	-2.72935	0.564402	1.37837	0.0110673	-0.774117	-1.6186	0.758432	1.76834	-0.711907	0.324057	-0.0438444	-0.73512	-0.255807	0.17679	0.0647467	-1.89116	-0.216482	-0.482435	0.433361	-0.521685	0.713965	0.381401	-0.2568	0.215576	0.0470491	-0.201985	0.93752	0.869401	-0.148414	0.663494	0.895398	-0.636483	0.393289	0.329707	-0.335493	-0.315782	0.361009	0.00285332	-0.205462	-0.572425	0.123247	0.194113	-0.242469	-0.118483	-0.593936	-0.624509	-0.513248	-0.217773	0.516546
-12.9121	-2.56527	-1.259	-0.502797	-1.80732	0.127133	0.087188	-0.0872659	1.04841	1.04835	-0.341465	-2.09463	-0.303128	-0.0365325	-0.211767	-0.799775	0.209448	-1.50894	-0.493461	1.34742	-0.664933	0.0813018	-0.789421	-0.442373	-0.373596	-0.778027	-1.20367	0.432233	-0.46705	-0.641704	-0.82411	-0.113472	-0.611544	0.291927	0.260861	-0.184982	-0.155979	-0.891417	-0.35071	1.13369	0.180015	-1.49056	0.25585	0.459636	-0.666536	-0.193189	-0.740463	-1.20187	0.588091	0.296411
-4.1853	-0.192639	0.502817	2.01075	-0.652884	2.10019	-0.354715	-0.295478	-0.548146	0.8737	-0.430608	-0.37256	0.350028	1.11539	-0.526085	0.450877	0.724073	-0.579517	-0.54769	0.82707	0.0390361	-0.524692	-1.24467	-0.449685	0.809986	-0.240851	1.17245	-0.51825	-0.313592	0.543873	-0.455423	-1.21278	-0.062602	0.335494	0.285586	0.501323	1.08623	0.643782	-0.963614	-0.0323007	0.600406	-0.0368517	-0.142826	0.343631	-0.235021	-0.124905	-0.759296	0.502267	0.264065	0.460972
-1.60786	-0.755791	0.0795582	-0.673093	0.413576	0.350916	-0.329229	1.99084	-0.72939	-0.0875243	-0.425081	0.472473	-0.732963	-0.228828	1.40426	0.246699	-1.32402	-0.667136	0.634704	0.454098	-0.0514723	1.60578	-0.234774	-0.273162	-0.24225	0.446453	0.498172	0.557266	0.565413	0.537687	-1.10797	-0.0761446	0.425458	0.285754	-0.0891523	-0.767687	-0.0619525	-0.0900491	-0.561202	-0.520848	-0.154528	0.0855347	0.78743	0.0875754	0.30304	1.08892	1.07676	-0.758698	-0.0967204	-0.858174
-1.91206	0.335307	0.521945	0.474339	0.91919	0.789132	1.09011	-1.0876	-0.0731007	-1.23728	0.467711	-0.901873	-1.59092	-0.513621	0.315184	0.129862	0.459308	0.422908	0.867991	-0.965713	0.729764	1.59282	0.085113	-0.370996	0.0364504	0.741061	-0.597838	-0.0142887	-0.0336693	0.0900208	0.769765	-1.0224	-0.583158	-0.372687	-0.277994	-1.44146	0.181908	0.114096	-0.261132	-0.309351	0.816727	0.0686172	-0.0160262	0.810383	-0.757946	-0.175402	0.0606921	-0.281244	-0.474263	-0.535619
5.69962	0.0570664	3.70394	1.87076	-0.567169	0.58253	-0.563037	-0.0879574	1.17974	-0.572184	0.301855	-0.249669	0.716859	-0.803909	-0.256733	0.408828	0.705848	0.789388	0.702377	-1.79402	0.665044	-0.905768	-1.03796	-0.261786	1.12846	0.237892	0.0488403	-0.586317	0.162735	-0.340273	-0.929357	-0.340815	0.620248	0.0661251	-0.43019	0.179313	-0.0990795	0.209635	-0.387574	0.539753	-0.71439	-0.759793	-0.305044	0.124208	0.174976	0.401634	0.443689	-0.103736	0.325732	-0.746278
-7.48213	-2.4758	-1.3588	0.742713	-1.90017	0.548296	0.781868	1.08624	-0.410287	0.73717	-1.52879	-0.0348838	-1.54286	0.914331	-0.687912	0.158813	-1.04412	1.91909	0.367	-0.642836	-0.725801	0.00773106	-0.294388	0.999666	-1.04019	0.353316	0.369238	-0.279477	0.316899	0.72166	-1.0768	0.479282	1.06788	0.532053	-0.159228	-0.64957	-0.0517695	-0.397736	-0.399322	-0.276278	0.506776	-1.34197	-0.593338	-0.26484	0.588383	0.0684875	0.318161	-0.129004	0.644602	-0.450837
-1.4197	2.62283	0.136221	0.146211	-1.74314	-1.14957	0.632115	-0.406195	-0.937482	-0.199519	-0.252814	1.51707	-0.69684	1.05296	0.382724	-0.311137	-0.955428	-0.115125	1.85607	1.33778	0.634803	0.439353	-1.11315	0.171606	0.152556	0.26242	0.940294	-0.883323	0.241545	0.500615	0.435704	1.70362	-0.61786	0.304431	0.295784	-0.447887	0.0855164	-1.20608	-0.257038	-1.30471	-0.315948	-0.328609	-0.857822	-0.489817	-0.0486833	-0.00466934	0.0554247	0.0861439	0.590824	0.493327
-0.763053	-3.25227	0.170794	0.142181	0.149935	-1.09985	-1.63816	0.619876	-1.35962	-0.197239	-0.585845	0.949743	-0.391578	-0.0338677	-0.785076	0.077403	-0.0393635	0.766732	0.277585	-0.085863	0.633262	0.888212	0.657608	0.527166	1.03117	-0.555396	-0.0758302	-1.72835	0.375581	-0.403546	-0.354836	0.214964	0.274391	-0.520961	-1.23375	0.244704	-0.577162	0.287147	-1.16717	-0.356749	0.924396	0.0364186	-0.409289	-0.297489	1.04553	0.00775904	-0.411875	-0.334356	0.147344	0.86937
-8.01822	0.630949	2.46582	-1.31817	0.199578	-1.09159	-0.571969	-0.600701	0.62572	0.129824	-2.53137	0.433684	0.672812	1.16013	0.252411	0.644501	-0.147218	0.0206035	0.6449	0.678527	0.373073	0.540821	-0.551889	0.947408	0.498186	-1.36753	0.797739	-0.010786	-0.550151	-0.198877	0.606329	-0.103435	-0.430629	0.0837394	-0.533924	-0.190382	0.224491	0.278332	0.64727	0.25035	-0.978232	0.437408	0.0569826	0.117808	-1.15521	0.450714	-0.411792	-0.824975	-0.0832978	-0.826288
-2.5657	-1.51049	-0.176485	2.66548	-1.62005	-0.993916	3.15502	1.56492	0.562002	0.0107571	0.657412	-1.20944	0.304773	1.26856	-0.328683	-1.13356	1.99586	0.274462	-0.113609	0.386526	-0.234949	0.0230584	0.239777	0.341938	-0.0161406	-0.312064	-0.437683	-0.18037	0.486987	-1.4742	0.0689243	0.730373	-0.926691	-0.602722	-0.0436341	-1.28691	-0.107801	0.237217	0.285621	-0.442746	-1.25282	-0.388486	-0.0983206	-0.0296291	0.38605	-0.846447	0.379691	-0.0723323	0.568459	0.425368
-7.96849	-0.0604469	0.186506	-0.461607	-0.0874512	0.711648	0.974822	-0.045481	1.20029	0.659045	-1.24038	0.185669	0.544156	-0.998723	0.00457188	-0.281078	-0.627221	0.632391	0.667943	0.39479	1.11001	0.852402	-0.566723	-0.719605	0.489597	-0.862151	-0.231892	-0.0948067	-1.21274	0.704677	-0.970201	-1.01642	0.0839985	2.22374	-0.58917	-0.161073	0.782655	-0.488536	0.659887	0.02989	-1.15343	-0.271049	0.301061	-0.363189	-0.223487	0.0361756	0.247108	0.154167	0.0381755	-0.551435
2.95963	-1.11517	3.16409	2.63623	-0.735517	-2.37185	0.0939415	-0.264931	0.188273	-0.393112	-0.804824	0.76139	-0.131685	-0.552201	-0.42408	0.386989	-0.234146	0.499552	0.240653	0.376226	0.20569	-0.741842	0.913297	0.364491	0.298736	-0.151802	0.075057	0.609901	-0.444851	0.410999	0.935779	0.444118	0.324794	0.421325	0.0864528	-0.157531	-0.0531017	0.343582	0.300381	-1.20009	-0.145982	-0.124907	0.272204	-0.332986	-0.112825	-0.0458972	0.407839	-0.215328	-0.549185	-0.0372467
-3.97681	-1.92229	3.17184	3.01704	-0.0436238	0.046306	1.48718	0.426768	0.825099	-0.147622	1.08337	-1.00548	-0.0729285	1.73189	0.499783	-0.70202	-0.477784	-1.06723	0.184436	-0.650397	-0.587568	0.501128	0.355711	1.01734	-0.400671	-0.822278	-0.258271	0.630206	-0.238485	-0.547961	0.0105693	0.0712536	0.797562	-0.58795	0.907485	-0.137955	0.445051	0.440026	-0.455718	-1.18474	-0.185379	0.149517	1.07321	1.1949	-0.142787	0.237328	0.301764	-0.0237134	-0.00444036	0.20481
-0.789789	2.47944	2.39986	1.11693	0.44167	-1.21454	0.859006	0.811372	-0.875502	-0.136359	-0.22898	-0.44995	-1.22951	-0.66993	-0.243176	0.617222	0.167051	-0.222133	-0.808681	0.421572	0.194152	-1.01798	0.0962247	0.401706	-0.408617	0.300843	0.410821	0.563614	-0.113558	-0.690602	-0.810322	0.154476	-0.874697	-0.397625	0.252998	-0.0339057	1.30856	0.0531991	-0.257796	-0.130024	0.70823	0.528554	-0.728646	-0.558766	-0.392964	1.38155	-0.0097692	-0.0143681	0.623842	-0.526884
-0.86118	2.77648	-0.561996	-1.10124	-1.92042	-0.925945	0.328651	0.364439	-0.319116	-0.0166462	-1.85933	1.45025	-0.139954	0.374433	1.59754	1.60203	0.0251223	-0.598523	-1.20638	0.996167	-0.802071	0.924531	0.265441	-0.427343	0.321699	0.0109749	-0.790551	0.110499	0.317775	-0.252164	-0.435408	0.544317	0.145656	-0.402149	0.00726094	-0.0930158	-1.47284	-0.676833	-0.830333	-0.527605	-0.764851	0.212042	-0.898398	1.04788	-0.536947	0.166665	0.0656021	-0.279524	-0.248039	0.0505767
-2.70759	0.31766	-1.11082	0.712084	0.530825	-1.04508	-0.206809	-0.695923	0.557757	-1.11286	0.877549	1.95756	-0.927738	1.58716	-0.432226	-0.459916	0.611901	0.569419	0.733658	-1.17109	0.318398	-1.0008	-0.186579	1.01412	0.564302	-1.10994	-0.446602	1.2772	-0.998613	0.547168	0.0146243	0.100271	0.360105	0.187995	-0.644772	0.0045461	-0.619369	-0.684154	-0.279869	0.500667	-0.470303	0.552065	0.360114	-0.322255	-1.00328	0.799315	0.304666	-0.907082	-0.45617	-0.176655
-0.0453234	-1.45127	0.0334813	2.37468	1.32327	-0.574085	1.29401	-0.340596	0.247261	-0.467805	-0.929987	0.108643	-0.491888	-1.31951	-1.21196	0.428798	-1.14576	0.609768	0.198851	0.367965	-0.641999	1.13735	0.436862	1.31238	-0.0149428	0.303813	-0.478773	-0.230261	-0.0280971	0.144547	0.0807678	-0.270019	0.656321	0.209839	-0.45504	-0.0669545	-1.29811	-0.238931	0.0122061	0.63466	0.168851	-0.427226	-0.390339	-1.11941	-0.510227	-0.400814	0.259715	-0.382145	-0.688257	0.409995
8.50612	-0.0863665	-1.58542	-1.51256	0.422263	-1.07789	0.64809	-1.16385	-0.467913	-0.956831	-0.212515	0.311989	1.26289	0.340809	-0.5954	1.15175	0.272121	-1.35934	0.278	-0.97567	-0.173589	0.325702	1.22096	-1.15444	-0.881185	-0.244883	-0.105853	-0.577967	0.0293822	0.172713	0.0400707	0.517919	0.571095	0.448316	-0.551906	-1.79238	-0.872857	0.165571	-0.0276519	0.531957	-0.0190352	-0.955113	-0.384787	-0.753275	0.894389	-0.065284	0.61803	-0.149126	0.610388	1.00196
-1.02984	0.115816	-0.725295	0.136774	-0.341451	1.01063	-0.625547	1.36478	-0.339361	-1.11663	0.61678	-0.741323	0.824526	0.324185	0.188987	0.394458	-0.673685	-0.246043	0.0315898	-0.450821	0.390766	-0.78833	-0.790051	-0.62412	-0.178263	-0.679186	-0.407616	0.775429	-0.244583	1.27585	-0.430252	-0.496741	-0.21626	0.543747	0.196863	0.229347	0.348385	-0.478797	0.296656	-0.631826	-0.953509	0.284231	0.331338	0.365484	-0.679981	-0.260056	0.559502	-0.972789	-0.153033	0.0609996
-1.44673	0.208552	-0.122878	0.599682	1.28599	0.597873	1.582	1.47044	0.200188	0.325402	2.04866	-0.452298	-0.984175	1.7748	1.28499	-0.326249	0.222046	0.0344137	-1.35448	-0.668013	-0.208017	0.278371	1.03619	-0.99811	-0.094574	0.499477	0.142869	-0.686582	0.786371	-0.263354	0.298156	0.819509	0.296253	-0.276511	-0.593352	-0.28694	-0.701148	0.627564	-0.538819	-0.576432	-0.0596879	-0.488447	-0.0960228	0.559535	-0.295908	0.124806	0.199746	-0.346773	-0.0745949	0.435518
-0.38507	4.27424	2.12338	0.261012	-1.0076	0.0169512	0.0584436	1.23134	-0.332788	0.69149	-1.01481	-0.135975	-1.41124	-0.522379	-1.05701	0.59606	0.699405	-2.05557	-0.675161	-0.622822	-0.830956	0.791862	-0.4088	0.549531	1.57062	-0.424187	-1.97149	-0.753079	0.0687014	-0.46069	0.72804	0.118862	-1.05637	-0.228853	-1.06771	0.221709	-1.02303	-0.351438	0.311994	0.688972	1.02145	-0.958371	0.312672	-0.565095	0.105222	-0.211029	0.903052	0.0665145	0.172449	-0.162941
2.45413	-0.178846	-0.107066	-0.153682	0.519991	0.828581	0.0896513	-1.44118	0.0380223	0.0197628	-0.965186	-1.736	-0.56755	1.44674	-0.150039	0.465761	0.380809	0.0587593	0.329757	0.503037	1.21928	-0.00263866	-0.721102	0.248766	0.59785	-0.945555	-0.348122	-0.507094	0.630305	-0.925828	0.2699	-1.14341	1.42611	-0.237547	-0.294477	0.622521	-1.17085	0.0655829	-0.301776	-0.00244343	0.187792	0.210539	0.114759	-1.17413	-0.781522	-0.171928	0.523688	-0.593433	0.96494	-0.0436375
-4.55653	-0.248229	0.324184	1.8184	-0.992816	2.37266	-3.34605	-0.62582	0.920216	-3.6144	0.290234	-0.401991	0.681935	0.415736	-0.438244	-0.626683	-0.768838	-1.00229	-0.314034	-0.182963	0.55317	1.51143	-0.505042	0.748366	0.11704	0.0765613	0.66108	-0.620725	0.252107	-1.19356	0.819835	-0.363057	0.598067	0.62682	-0.366684	0.535278	-0.130472	0.731411	-0.302742	-0.109108	-0.282891	-0.0567611	0.371622	-0.0282867	0.0367576	0.186055	0.134242	-0.718548	0.684478	0.00899052
-0.205675	-2.8648	0.71189	-0.500484	-0.168711	0.861944	1.13972	1.59972	0.795826	-1.30566	0.380331	2.47135	0.68813	-0.640608	0.817047	0.0303143	-0.187833	0.518405	-0.489789	-0.871229	-0.083303	-0.301003	-0.160661	-0.979436	0.37102	1.37983	0.5079	-0.440716	-0.131814	-0.784983	-0.159141	0.635753	-0.149727	0.0683291	-0.190649	-0.346266	0.4847	0.574402	-0.887235	-0.0726897	0.943835	-0.349923	-0.928302	-0.0800755	-0.566221	0.166064	0.496362	0.0404652	-0.288942	0.266283
2.31482	-1.2255	0.0771882	-2.29343	0.835385	-0.0249087	1.54095	-1.98465	-2.38806	0.113629	0.114094	-0.405753	-0.08833	0.625706	-0.194897	-2.38449	-0.345725	-1.44514	0.21536	0.738433	0.286213	0.405429	-1.12827	-0.100719	0.306478	-0.126368	0.466856	-0.661713	-0.792313	-0.188878	-0.620161	-0.413052	0.252411	-0.0889278	0.568418	0.642	-1.6685	-0.510547	0.0218559	0.763128	-0.205759	-0.619383	-0.237544	-0.657957	1.12622	0.198424	0.685653	0.118155	0.100327	0.532995
-6.09316	0.595624	-1.00045	-1.02975	-1.7314	0.822378	-0.493798	1.94407	0.152031	0.112025	-0.803371	0.372442	-0.703565	0.823051	-1.11644	0.359226	1.39872	-0.928196	-1.17121	-0.583982	0.585256	0.441197	-0.0582352	0.924429	0.0728087	-0.379277	-0.60396	0.307055	-0.399352	-0.803009	-1.39687	-0.782029	0.183145	-0.405209	-0.282598	-0.315675	-0.792493	0.643394	0.00718462	-0.716433	-0.0818597	0.0350195	-0.0468157	-1.10891	-0.301061	0.648138	0.445598	-0.194345	-0.282735	-0.34016
-12.4086	5.68095	2.05948	2.84951	0.390494	1.08882	0.804121	2.47758	0.551229	0.552552	-1.32033	-0.563062	-0.117552	2.65676	0.613244	-0.294162	-0.162309	-0.638703	0.0403627	-1.39356	-0.933275	-0.380589	-0.0378676	-0.218405	-0.988831	-0.0964485	-0.159605	0.107557	0.546409	0.683251	-1.28437	0.144172	-0.448853	-0.463893	-0.683364	-0.633045	-1.31008	-0.308341	-1.14026	0.338735	0.170906	0.579434	-0.905123	-1.14725	0.230837	-0.0509751	-0.0865589	-0.817737	-0.628444	-0.40069
0.523414	-0.244997	0.671885	-1.60697	-0.91621	1.00367	0.845469	-3.65502	2.43561	-0.707432	1.46865	0.567788	-0.21885	-1.49433	0.801233	0.271205	-0.051153	-0.488123	0.605631	0.582681	-0.330647	-0.37342	0.763686	0.50729	1.14345	-1.18455	0.218735	1.13494	-0.409773	1.23872	0.106947	-0.0245882	-0.535619	-0.117678	-0.195652	-1.20728	0.496922	-0.555227	-0.00231131	-0.230213	-0.09978	1.19712	0.0084023	0.247505	-0.816253	0.158738	-0.00866398	0.685324	0.0932217	-0.27321
-3.25349	-1.13543	1.39966	0.511278	-1.28792	-0.76737	-0.883135	0.631923	0.558959	-0.0245044	-0.0135003	-0.460132	0.866126	-0.620803	-0.993756	0.558604	0.864824	-0.178213	1.37718	0.515052	0.0386972	-0.159751	-0.107804	0.201224	0.132131	0.607187	-0.935078	0.923999	0.0456095	-0.234475	-0.334729	-0.591026	0.817472	0.175546	-0.493753	-0.204898	-0.0144306	0.532654	0.614241	-0.373137	-1.81031	-0.291971	1.30466	-0.102518	0.315057	0.670208	-0.800574	0.343034	0.240753	0.198104
-1.92311	1.2336	0.71907	0.141533	-1.62709	-0.138262	-0.257864	-0.942485	3.60447	-0.828441	-0.926129	0.341717	-0.644722	-0.898312	-0.502065	0.456948	-0.69349	0.964651	-0.103287	0.610454	-0.160502	0.255255	0.28596	0.281517	-0.0917802	0.561713	0.505939	0.076816	-0.412327	-1.39297	1.0387	-0.754849	-0.606431	-0.271788	0.249197	0.422127	0.357888	1.17067	0.403225	0.273501	-0.447919	0.360016	0.271495	-0.827489	-0.495314	0.780085	-0.0108562	0.108324	0.0819788	0.127973
-7.11644	-1.21879	-0.0302428	-2.92471	0.870545	1.10869	1.44396	-0.335703	-1.95857	2.64472	-1.75372	0.385746	-0.588103	0.775168	-1.09581	-0.340659	-0.507777	1.48751	0.283063	-0.0890246	-0.39283	-0.628579	-0.555932	1.04911	-0.553407	-1.59329	0.632239	0.492309	-0.512236	1.56313	0.714735	0.760532	-0.136415	-1.29516	0.126359	0.793978	0.438488	-0.460307	-0.194746	-0.0559751	-0.79908	-0.217298	0.854067	0.763103	-0.729123	1.36342	1.12491	-0.0645893	0.131009	-1.07049
-13.2264	-0.954955	2.61953	-0.192967	-1.87892	-0.182279	0.344465	-0.845633	-0.508913	-0.595938	0.000143016	0.999289	-0.000113356	-0.213931	0.308717	-0.193001	-0.460654	-0.476647	-0.493361	-0.555003	-0.662694	0.597038	1.09512	-0.571838	-0.218517	0.218426	0.688807	0.341681	0.197708	0.244142	0.443067	0.159737	0.751741	-0.182265	-0.306839	0.276205	-0.646653	1.13462	0.430367	0.115944	0.24151	-0.328021	-0.230072	-0.4213	-0.189237	0.361021	0.0136245	-0.480497	0.27964	0.264084
-9.97032	2.55755	1.12097	0.655619	-0.93442	-0.0372947	1.1246	-0.999241	0.0547704	-0.11572	-1.0791	-1.23323	1.19669	0.61328	-0.117198	1.0158	-0.873928	-0.726736	-1.50365	-0.0224758	0.839504	-1.15242	1.50083	-0.0189595	0.345617	0.314648	1.16081	0.518011	0.379593	1.07079	0.443044	0.248435	0.0684831	-0.539022	1.04479	-0.146465	-0.441525	0.493775	0.141679	-0.761271	-0.618749	0.0795053	0.52502	0.0799967	-0.269414	-0.586035	-0.0132709	-1.1535	0.441625	0.784672
-16.7243	1.9382	3.58116	0.68315	-0.328361	0.326939	-0.797569	-1.42546	0.526624	1.62683	0.458665	0.572899	1.13528	-0.13296	-1.24603	-0.158835	-0.168347	1.62165	-1.72196	-0.812562	-1.26555	0.025146	-0.459399	1.17216	-0.252121	-1.22954	0.404946	-0.259306	0.484662	0.640773	-0.691798	0.586855	-0.934495	0.0551108	-0.93521	0.000804636	1.98323	0.0485508	-1.0994	-0.843579	-0.157277	0.404552	0.185782	0.231603	0.314155	-0.584584	0.917139	0.0454695	0.490003	0.0313427
-4.97004	-2.48836	0.4803	0.872245	0.957855	-0.380653	1.1234	-0.937403	1.27622	0.593529	-0.304924	-0.68141	0.854411	-1.38729	-0.335456	-0.118136	0.0963774	-1.49227	-0.293192	0.468434	0.648561	-0.870299	-0.805488	0.641917	-0.311162	1.08332	-0.618719	0.0587272	-0.403907	0.301453	-1.11349	0.0485342	-0.348385	-0.544358	-0.0414852	-0.473132	0.466169	0.0674544	0.876119	-0.408741	0.381742	-0.713503	0.682507	0.171549	-0.160106	0.0611492	0.426754	0.919682	0.298359	0.12234
-10.8152	-0.791087	2.51604	-1.37995	0.421064	-0.0634573	-1.6067	0.171242	0.189811	-1.65028	1.52851	0.0460579	-0.784494	0.533011	-0.00661547	-0.598043	0.0953919	-0.0962572	-0.385713	0.979696	0.345783	0.358901	0.0837607	0.268873	0.344839	-0.031217	-0.308459	0.321097	2.33391	0.584899	-0.535396	0.193374	-1.63659	0.244983	0.024751	0.584242	-0.0799971	0.172183	-0.0403083	0.671212	-0.218149	0.666404	-0.667256	0.261192	-0.249671	0.180466	0.553878	0.32987	-0.39578	0.915877
4.32574	-0.0259067	2.74845	-1.03386	-1.09621	0.243557	1.24041	-1.09058	0.592289	-1.15041	0.852733	-0.110395	-1.39315	2.57223	-0.0682884	0.49266	0.594555	-0.741595	-1.52658	0.763444	1.0665	0.384446	-0.00336548	0.510747	-0.00161986	0.776978	-0.00276832	-1.19147	-0.369781	0.517256	-1.00168	-0.760596	-0.62333	0.699054	-0.455941	1.35131	-0.241088	0.686974	0.702156	-0.788681	0.584927	-0.0322066	-0.282169	0.562742	-0.183178	0.201052	-0.496182	-0.118083	0.0640616	-0.854652
-3.5232	1.812	2.82854	-1.03322	-2.38257	-0.167653	-1.74308	0.591934	-1.01739	0.69105	0.225204	-0.624636	0.591706	-0.119125	1.29693	0.0565233	0.905123	-0.810481	-0.177088	0.414017	0.19192	-0.253107	1.68013	0.328119	-0.848424	-0.742721	-0.64739	0.0436869	0.81919	0.13765	0.864613	0.605684	-0.514008	-1.07198	-0.116246	-0.655356	-0.527678	1.03554	0.339976	-0.259253	0.0392162	-0.0654309	-0.151075	-0.5741	1.26962	0.00522494	-0.695693	0.845615	0.172461	-0.278123
-4.12183	0.862676	2.13014	0.00543671	-1.0332	-0.567041	-0.0653636	-0.867794	0.242913	-0.300018	-1.48181	-0.2278	-0.22157	1.18842	0.089425	-1.15033	0.365416	0.37054	0.365823	0.195242	0.14757	-0.439206	-0.0749941	-0.0109979	-1.10189	0.877994	-0.260904	-0.621028	-0.657111	1.06247	0.475565	-0.131457	-0.157773	0.509547	-0.746642	-1.25923	0.746973	-0.424432	-0.259054	1.27475	-0.407028	-0.757633	0.662346	0.654997	-0.329614	-0.400938	0.585101	1.36731	0.608346	-0.64685
2.1096	-0.329178	1.1636	0.251887	0.565597	-0.520495	1.77447	-0.0193571	-0.679388	-0.732001	0.00450863	-0.465565	-0.299447	0.362041	0.171331	-0.203252	0.371995	0.205121	-0.0118267	-1.27441	0.489644	0.752298	-0.390885	0.566641	-0.235913	0.492937	0.373259	0.489295	1.06666	0.515954	0.341144	0.615609	0.214449	-0.0732873	-0.112074	-0.464959	0.722588	0.636913	-0.624907	-0.479464	0.0863653	0.498167	-0.613748	-0.433221	-0.0123701	1.40373	0.613026	0.384399	0.620152	-0.402324
-8.48422	-0.0667147	0.136589	-0.447992	-1.01485	-0.36493	0.0174635	-1.1162	-0.0329664	-1.32485	-0.237297	0.163272	-0.0960086	0.278626	-1.73446	-0.535961	-0.404539	-0.59435	-0.916243	0.870882	1.40333	-0.392756	-0.793208	0.688417	-0.243247	0.489808	-0.0185762	-0.242237	-1.45467	0.439222	0.880159	-0.20746	-0.386929	-0.756959	0.257952	0.0159464	-0.129368	0.243622	-0.884153	1.56799	-0.507526	1.20481	-0.14429	0.0122984	0.677016	-0.217293	0.251236	0.821618	-0.2918	0.448394
-4.93902	-3.12969	1.31363	-0.908143	-2.23667	-0.296213	-0.0838897	0.786517	-0.877604	0.057243	0.303929	-0.221756	0.660504	0.116375	0.420776	1.64143	0.588361	0.390478	-0.00953718	-0.341614	-0.398341	-0.222675	0.0594231	-0.254464	0.705165	0.0198303	0.158235	-0.560155	-0.650334	1.19941	-0.386769	0.493102	-1.24269	0.42035	0.775227	-0.32754	-0.330505	-0.919882	-0.129581	-0.802065	-0.576295	0.606411	-0.806981	0.22305	-0.14168	0.601526	-0.28666	-0.0397719	0.449759	1.09784
0.0429937	-1.24697	1.41429	-0.717301	-0.774033	0.541069	0.500697	-0.827283	-0.421048	0.313109	0.599795	0.176119	-1.81058	-0.0870388	1.1639	0.0874425	0.464458	2.19721	0.81724	0.323909	-1.31834	0.809061	-1.58791	-0.423334	0.420286	-0.393525	-0.37873	-0.397703	0.215938	0.43484	-0.281303	-0.798729	-1.15772	-0.441704	-0.100191	-0.283341	-0.929481	0.0681474	-0.284837	0.273863	-0.920868	0.00868321	-0.768827	-0.114398	0.651392	-0.128995	-0.330176	-0.577361	0.1578	0.559557
-5.46924	-2.27792	-1.99562	0.179677	-0.168501	-0.636989	2.34192	-0.169923	1.3629	-0.763456	0.585841	1.18402	-0.435468	-1.23308	0.322872	0.311	-0.598239	0.766129	-1.38972	0.541537	0.271758	-0.731498	0.284668	-0.433485	-0.00523932	0.179491	-0.00254332	-0.162382	0.256311	-0.631941	-0.367691	0.500633	0.864932	-0.0604968	0.321588	0.415525	0.677771	-0.196752	-0.363176	0.0458702	-0.23314	-0.238792	0.412533	-0.175218	0.822759	0.634557	0.434536	-0.0556358	0.21386	-0.22379
-3.45897	-0.441972	-1.79973	-0.437155	-0.167955	0.275526	-2.41634	-3.17509	-0.00264063	0.13357	1.97517	1.62462	-1.49536	0.440618	-1.29985	-0.933551	-0.0265362	-0.812015	1.19982	0.426269	-0.34278	-0.156719	0.294159	1.09802	-0.574106	0.272756	-1.13226	0.133606	0.130589	0.721891	-0.721384	1.17579	-0.945114	-0.696101	0.694617	0.321439	1.06576	2.44506e-05	1.74274	-0.191611	0.577133	0.0251639	0.284622	0.326214	0.444965	0.514296	-0.466576	0.774309	0.0124998	-0.236016
-9.32327	-2.67799	-2.09564	-1.73053	0.659395	2.00385	0.141124	-1.65968	-0.764982	0.788137	1.68116	1.47121	-0.489553	-2.95929	0.196382	-0.981681	1.19734	0.882654	0.0914424	-0.40897	1.44542	-0.279955	0.0208422	-1.02995	-1.35638	0.00033853	-0.373293	0.923032	-0.508843	0.122746	1.37764	0.547934	-0.692699	0.272026	0.856467	-0.628614	0.732024	0.541816	-0.796151	0.598256	-0.604936	0.143011	-0.508083	-0.788879	0.456929	0.143471	0.364149	-0.470705	-0.0847687	0.760487
-8.60766	0.812702	3.31742	-0.304385	-0.519504	-0.911803	1.25011	-0.911103	-1.68986	-0.00552711	0.831711	0.845288	0.180873	0.0657986	-0.264844	0.917626	-1.11829	0.61833	0.870462	0.544282	1.4674	0.437253	1.02704	0.644702	-0.540629	-0.809141	-1.29554	0.74026	0.463628	-0.0607483	0.765252	-1.34285	-0.0958973	0.231637	-0.179859	0.814636	0.289224	1.07734	-0.289715	0.394647	-0.17484	0.62274	0.152133	-0.904337	-1.00981	0.143735	-0.188678	-0.423195	-0.493201	1.03986
1.72749	-0.343819	-3.63361	2.20501	-0.786108	1.74701	1.89447	-0.953134	0.447442	-0.110106	1.10991	0.651446	1.30617	-0.070516	1.54974	0.239323	0.453863	0.141862	1.24227	0.371551	0.62702	0.285281	1.00236	0.246001	-0.771821	-0.034863	-0.584049	-0.0212939	-0.544574	0.225616	-0.238249	0.320819	0.740397	-0.074765	0.478774	0.2483	0.763034	0.485229	-0.133882	-0.329741	0.419133	-0.643494	0.0531261	1.07329	0.457494	0.784292	-0.171293	0.763872	-0.439491	-0.682241
-5.81611	2.98059	-1.2208	-1.19649	2.08865	0.678802	-1.26207	0.291026	0.718145	-2.63916	0.233719	0.912228	-0.0143016	0.827263	0.719417	-0.026951	-1.33763	0.0443808	-0.875042	-0.674883	-0.224296	-0.939	-1.62805	-0.564271	-0.434557	-0.322546	0.0835419	-0.290405	-0.680517	-0.882905	-0.259436	1.49421	0.448901	-1.26042	-0.632663	-0.962733	-0.109208	-0.832196	0.0653832	-0.10412	0.12814	0.16137	0.208049	-0.157346	0.740116	-1.18701	0.137453	-0.22716	0.150137	-0.302094
-2.58863	0.786903	1.33181	-3.34036	2.57616	0.959176	-1.29246	1.6769	1.42406	-1.94602	0.658351	1.06639	0.579906	0.403886	-0.770668	2.26062	-0.352205	-0.0876763	-0.3863	0.999753	0.886778	-1.15935	0.501125	0.318009	-0.363516	0.389337	0.326121	0.152706	-0.999838	0.00254756	0.665061	-0.541376	0.75861	1.15818	-0.779768	0.563572	-0.177257	-0.745781	0.273129	0.675237	-1.47024	-0.0716572	-1.31453	-0.0880623	-0.0512494	-0.906672	0.41984	-0.685039	0.50654	0.518551
-11.4442	2.50458	1.05034	1.51279	-1.39635	-0.0758557	0.982264	-1.79532	-0.404555	0.400112	0.661327	-2.20974	0.656988	-0.925217	-1.7836	-0.370046	0.164094	-1.2165	0.898194	0.110532	-0.367034	0.0456724	-0.411982	-0.407938	-0.414856	0.326439	-0.0743556	2.20062	0.210922	-1.31626	-1.84004	0.43465	-0.308081	-0.255663	0.436123	-0.528014	-0.160982	0.397498	-0.0670937	0.337577	-0.0651831	-0.106778	0.54937	0.631176	-0.102682	0.135639	1.71313	0.177183	0.794751	-0.723489
-8.45013	1.74197	-1.95898	-1.8207	0.314917	0.495664	0.0255811	1.31675	-0.825979	0.89296	1.01907	-0.923468	0.320658	1.62862	-0.462652	-0.0776887	0.000104437	1.1988	0.162435	0.0522562	-1.1512	-0.0749545	-0.95679	1.44777	-0.963905	1.29988	-0.590043	-1.21363	0.192818	0.859052	0.382374	-1.13692	-0.330605	1.65482	-0.526874	-1.04161	-0.282435	0.636707	0.719049	-0.46617	-0.146092	-0.0613311	-0.417461	-1.0501	-0.600094	0.775663	0.699972	0.573344	0.147206	-0.277525
-4.42787	-0.426474	0.120307	-0.085704	-0.449502	-0.646589	1.31747	0.0367375	-1.68332	-1.43406	0.555675	0.607958	0.651125	-0.455574	0.198279	1.09809	-0.498562	-0.0701126	1.34647	0.646363	0.14406	0.932249	-0.675213	0.24567	-0.925171	-0.548195	-0.444306	0.114946	0.26519	1.16376	0.258582	0.804154	0.837459	0.0477824	0.0920427	-0.40602	1.0449	0.95876	-0.945202	0.475268	-1.29238	-0.667105	0.0251729	0.433654	0.320603	0.0256763	-0.2177	-0.180962	0.465827	-0.394918
-5.38413	0.816234	-1.00718	-3.00793	-1.97261	-0.403372	0.856134	0.106904	0.279909	0.981704	-0.0383261	0.235564	-0.811615	1.60756	1.73956	-0.0899819	0.0938074	-1.1187	-0.112585	0.204015	-0.477732	-0.459905	0.930526	0.851943	-2.35086	0.838149	-1.00739	0.0541684	0.914314	0.184972	-0.140426	1.95543	-0.736932	0.539175	-0.865354	1.62013	-0.595202	1.18013	-0.500858	0.352356	-0.590175	0.769347	0.714443	-0.535523	-0.497086	-0.510619	0.949055	-0.0539151	0.050893	-0.650316
-4.84414	-1.23637	-1.82999	-1.0488	0.72059	0.708198	-0.423391	0.549069	-0.344499	-0.710102	0.636427	-0.219814	0.410505	1.56647	0.733829	0.528105	0.0654063	-0.430763	-0.0643721	-0.243068	1.00519	-0.399575	-0.276026	0.341393	0.824733	0.280533	0.971082	-0.395196	0.164417	-0.21463	-0.162886	-0.156494	0.649954	0.13229	0.369692	0.327326	0.291499	-0.673078	0.943208	0.197986	1.10703	-0.534694	-0.338746	0.100903	-0.640123	-1.03711	2.11643	-0.0165625	0.913606	-0.727111
-14.3807	4.01239	-1.3179	-1.58896	-1.75148	-1.03067	-0.935957	-0.447032	0.435967	-0.199697	-0.792693	1.64146	1.43179	2.22592	-2.91568	0.633263	-0.341102	-0.597876	0.827496	-0.216196	1.42269	0.676868	-1.5464	-0.372541	0.229992	-0.210366	-2.00616	1.26185	-1.02028	0.638345	-0.428932	-0.777172	-0.59066	-0.96425	-0.41397	-1.23844	-0.445673	0.754932	-0.757963	1.11929	0.0859071	0.0953373	-0.446757	0.189598	-0.210477	0.445697	0.45074	0.541231	0.177161	0.500297
-3.61715	-0.126075	2.24162	-1.60453	-0.589176	1.37544	-0.0919335	-0.59011	-0.525642	0.000236572	0.715981	0.929744	1.80773	-0.527889	-0.00471304	1.04449	-1.14626	0.458699	0.828211	0.250459	0.347304	1.70863	0.508713	-1.42785	1.05407	0.0652296	0.272508	0.319859	-0.549399	-1.28596	0.290668	-0.31217	-0.98047	0.313656	-0.401382	-0.32085	0.386542	0.490821	0.516868	0.425642	-0.930141	0.26219	0.368169	-0.0396819	0.181357	-0.475399	-0.0592906	0.131106	-1.04003	0.064795
-4.86318	-1.77396	0.339918	-2.73214	1.47754	-0.774079	1.01607	1.58604	-2.53861	-0.397982	-0.0344801	0.212597	0.465914	-0.0199338	-0.60319	0.375251	-1.45744	-0.12931	0.859058	0.316732	-1.19963	-2.3999	0.804306	-1.41607	0.933747	0.0622023	0.00949129	-0.589784	-0.391084	0.570135	-0.857468	-0.00175824	-0.263406	-0.32387	0.191689	0.940636	-1.15307	-0.740185	-1.04114	-0.0867261	0.823425	-1.20485	-0.581985	0.146116	-0.58957	0.410436	0.0162361	0.0824266	-0.362671	-0.809132
1.04314	-0.134822	0.846804	-0.489829	-0.180055	1.25787	-0.679294	1.7147	-0.00142364	1.08897	0.865225	-1.8277	0.18027	-0.242516	0.418889	-0.686398	-0.382118	0.908602	1.37215	0.281188	0.757673	0.291206	-1.0348	0.435435	-0.931334	0.419288	-0.141385	0.139188	0.32339	-0.377127	0.360528	-0.16772	0.390199	0.769567	0.603154	-0.378533	0.503113	-0.605413	-0.5546	0.355552	-0.0138816	-0.347075	0.56518	-0.00198883	0.72062	0.531438	0.842172	-0.433162	0.309885	0.313371
-7.85594	-2.18694	-5.66577	-1.77558	1.60414	-2.96409	-1.4496	-1.41158	-0.147053	1.21687	-0.154183	-1.16369	2.5264	0.509783	-0.505187	0.996396	-1.82278	-0.0490742	0.772127	-0.746854	-0.216078	0.00375097	-0.658199	1.08684	-1.20221	0.735772	-0.650644	-0.152072	-0.838239	-0.50606	0.258994	0.677929	-1.42676	-0.221505	-0.2271	-0.180077	0.146467	0.248448	0.187476	-1.11443	-0.803334	0.187517	-0.309278	-0.207904	-0.454321	0.882697	-0.287148	-0.988418	-0.466752	0.461107
-3.6952	1.07835	1.62905	-0.703363	0.835759	1.71463	-0.081577	-1.74148	-0.951641	-0.941561	-0.823939	-1.62177	0.320091	1.26338	-0.805069	0.412289	-0.599637	-0.814155	-1.96301	0.554846	1.01365	-0.195179	0.246584	-0.631041	1.11987	-0.417433	0.0520024	-0.420621	0.726176	-0.183848	-0.0114429	0.0637581	0.216795	0.413803	-0.28145	0.244917	0.472019	-0.132902	0.0250157	-1.12441	0.868379	-0.112763	0.152505	0.0897933	-0.35949	0.624375	-0.333439	0.271352	-0.399622	0.0510113
-18.5005	-1.97875	1.54208	-1.84543	2.07821	0.924844	-0.556656	-1.33266	-0.643407	0.900574	0.169275	0.0345855	0.335309	-0.42611	-0.949158	-0.699148	-1.34498	0.292584	0.596361	-0.738884	-0.483683	-0.0167773	-0.102512	-2.89974	1.13672	-0.364229	-1.27297	0.57661	1.45117	0.197159	-0.233758	0.674279	-0.355916	-0.221194	-0.439789	-0.33082	-0.0653307	-0.167841	0.130461	-0.491212	-0.622533	0.757995	-0.270526	-0.48255	-0.574652	0.811228	-1.21563	0.572723	-1.20556	0.471656
-8.60906	0.708893	1.89235	0.0570063	1.86754	-2.39059	2.42347	0.420937	0.0763521	0.0647755	-0.425793	-1.24976	0.572799	-0.259634	-1.11771	-1.54824	-0.456017	-0.706104	-1.57923	1.53986	-0.683594	-1.11386	0.89767	0.171886	0.265066	-1.08259	0.0848175	1.61854	-0.172175	1.19255	-0.396915	-0.369265	0.102821	-0.90865	-0.0286312	-0.0407066	0.194028	-0.0177772	-1.02035	-0.684303	-0.702549	0.092783	-0.149544	0.316486	-0.601829	-0.921494	1.03724	0.0955167	-0.717304	0.426673
-6.07061	3.10594	-0.065239	-1.18434	-0.482936	0.46175	1.32917	0.621959	3.35052	0.150973	-1.11533	0.503707	1.40174	0.353973	-0.412407	-1.16234	-0.567363	0.508309	1.0487	1.66919	0.676705	-1.10554	-0.60869	0.532774	0.509154	0.999931	-0.763571	0.614755	0.376858	-0.0764376	-0.139918	0.730569	-1.61805	-0.00578683	-0.0136361	0.518748	0.402813	0.365422	-0.460495	0.733602	0.430789	0.00299721	-0.353196	-0.0979672	0.0843121	-2.30587	-0.295327	-0.925309	-1.24929	0.124887
-5.52398	2.65873	2.00489	-0.86903	2.1859	-0.858933	-1.04877	-0.607527	-0.0479592	0.388023	-0.462289	-0.00844441	0.68434	0.167714	0.00206294	1.00763	-0.355881	-1.94595	-0.653776	-0.660147	-0.12567	1.02824	0.401697	0.741625	0.198291	-0.731903	0.810554	-0.305503	0.773423	0.0489075	0.994063	1.30074	0.752205	0.371473	0.339692	-1.05484	0.076946	0.54204	-0.831427	0.1574	0.00152466	-0.891938	-0.206549	-0.253301	-0.692286	0.572965	0.254763	0.442958	-0.0997086	0.199768
-11.1342	0.43689	-0.62411	-0.616219	-1.56968	-0.712655	-0.0829956	1.30891	0.175044	0.110568	-0.541165	0.3107	1.22852	-0.606125	1.41438	-0.878128	-0.187499	-0.687098	-1.22995	-0.599665	-1.23945	-0.0913503	-0.697453	-0.152024	0.236352	0.390718	-0.849997	0.370711	-0.135092	-0.536205	0.442888	0.230784	-0.108389	0.196228	-0.154372	0.107676	0.315742	1.01847	0.159473	-0.0441314	0.315723	1.16514	0.0870173	0.412951	0.253809	1.03209	-0.902332	-0.0268759	-0.287191	-0.40114
-10.2977	2.66065	0.826135	0.174339	-0.748215	1.29787	-1.26324	0.0722004	-1.41249	-0.880945	0.753997	1.87334	0.111869	0.273886	0.940472	-1.02911	0.881714	0.199473	1.72137	-0.712619	-0.98464	1.5021	0.257747	0.295066	-0.306995	0.694776	-0.23106	-0.253221	0.0382181	-0.00839503	-0.70413	-0.983595	-0.743788	-0.519118	-1.09168	0.846928	-0.0859277	0.559856	0.477785	-0.242381	-0.446962	0.396246	1.31058	0.212726	-1.58025	-1.20898	1.02376	0.625197	0.39223	1.07031
4.23288	-1.7938	-0.318825	-0.422229	2.22736	0.654208	-0.264577	-1.35876	0.915698	-0.943162	0.706068	-1.824	-0.0527268	1.04517	-0.122935	0.327938	-0.715301	0.397914	0.409358	0.0892628	0.0690111	-1.54588	-0.695329	0.293606	-0.794762	0.501025	-1.11554	0.0615168	0.50871	-0.0488246	0.429555	0.674041	0.0673042	0.461704	0.300435	0.475193	0.462088	-0.127718	0.621263	0.451612	-0.648269	-0.52472	-0.998192	0.147636	1.56982	0.18613	-0.10754	-0.255839	0.0599096	0.401758
-3.44673	0.700324	1.22204	-0.835164	0.458345	0.616688	-1.35431	1.27817	0.187536	0.274653	-0.711864	-0.517543	0.0280414	-0.45134	-1.02624	0.791548	0.860292	-0.504698	-0.664398	-0.173573	1.19855	-0.732255	-0.235284	0.931871	-1.32809	-0.217521	0.603613	-0.555206	0.170965	1.11681	-0.266622	-0.826475	-0.26682	1.04742	-0.458206	0.391888	-0.0572635	-0.585977	-0.997524	-0.795722	0.276353	0.735392	-0.782931	0.584133	-0.0436393	-0.971088	-0.0154042	-0.68864	0.322392	0.276403
-2.15389	1.50287	3.06038	-1.49277	0.689284	-0.708378	0.965837	-1.87914	-0.346477	0.15369	-0.53061	1.40172	-0.630214	1.15667	-0.00983448	0.337833	0.0551565	-0.635809	-1.15371	-1.47897	-0.0571859	-1.69133	-0.837622	-0.375286	0.0986557	-1.42779	0.103907	-0.466845	0.295134	0.694344	0.293421	1.35654	0.343988	0.345869	-0.196764	0.917957	0.14586	-0.842131	0.735374	0.527927	-0.172281	-0.26321	1.17323	-0.133249	0.132043	0.453741	-0.677631	-0.0742844	-0.503688	0.556286
-10.5195	1.79323	-3.9901	3.5393	-3.12135	-0.10601	-0.808176	0.724989	-0.121444	-1.37273	0.709463	-0.417906	-0.540284	-1.23169	0.28591	-0.640262	0.267231	-0.123724	-0.181196	1.12018	0.34391	0.592727	0.394311	-0.940929	-0.93141	0.911914	0.0923484	0.226118	-0.0148743	1.39779	0.0849301	0.228927	-0.656828	1.37835	1.27058	-0.00686945	-0.916158	-0.345158	0.217516	0.927974	-0.0312431	0.378581	-0.26134	0.222865	-0.276285	0.39009	-0.0263614	0.0110817	-0.43526	0.967517
3.80767	-0.453296	0.889679	-0.743285	-1.22139	-1.06737	0.935754	0.53828	-0.0696869	-0.768569	0.0487951	-1.4146	0.447717	-0.15186	0.156378	-0.466082	-0.016054	1.24844	0.854856	-0.376557	-0.194907	-0.444686	0.0854837	-0.170789	-1.26716	0.913962	0.771374	-0.0928446	-0.128049	-0.49359	0.133966	1.06704	-0.717649	-0.224824	-0.377674	0.609054	0.293071	-1.07969	-0.285134	-0.523599	-0.0341173	-0.762481	-0.870774	0.43496	0.426402	0.0744432	0.735954	0.170041	-0.283842	0.289093
-7.44444	2.12606	-0.0259641	2.27803	-1.51176	-0.180936	0.883961	-0.0386417	0.58697	-1.91836	0.913454	1.64179	0.906811	-0.0973573	-0.728278	-0.847554	1.33894	1.06098	0.28321	-0.634108	0.216827	-0.249247	0.810469	0.408278	-1.0339	-0.471547	0.674711	-0.267307	-0.615584	0.413941	0.62992	-0.955565	-0.0279277	-0.805608	0.155486	0.552355	-0.892945	-0.0342052	1.27211	0.216488	0.0378504	0.596068	-0.62621	0.431277	0.223696	-0.0306794	-0.601075	0.849128	-0.213417	-0.471437
-7.05179	-1.42419	-0.15059	2.7481	1.68273	0.534939	2.06388	0.680914	-0.00924165	-1.43086	-0.215208	-0.917065	-0.671389	0.19022	0.254019	1.15484	0.866597	-0.549272	-0.39407	-0.564837	0.475584	0.347661	0.073092	-0.33782	-0.0931002	-0.994635	0.697223	-1.27876	0.721044	-0.581436	-0.205907	0.862794	0.0322538	-0.0191664	-0.894813	1.1565	-0.768451	0.465784	0.197616	0.20148	-0.256409	-1.13977	-0.386513	-0.445847	0.255377	-0.836388	-0.489461	-0.314966	-0.776515	0.114751
-6.37855	-0.816347	-0.607722	-1.05802	-0.661747	0.40858	0.664157	1.17074	-1.44502	0.349634	-0.311537	-0.754364	-0.991125	0.570489	0.147887	-1.37227	0.63537	0.345091	-0.0316542	-0.124281	0.0454941	-1.17187	-1.06017	0.407041	0.759209	-0.547251	0.468195	-0.000661744	-0.32396	0.224277	0.883753	0.122792	-0.0113849	-0.538482	-0.749944	-0.298187	0.223612	0.705087	0.14945	0.660921	0.0501596	0.293085	-0.59702	-0.405318	0.51644	-0.0660566	0.0246593	0.650042	-0.243061	0.860822
-11.5613	0.739016	0.893271	-2.33894	3.15297	-0.78918	-0.0591242	0.985928	1.02016	-0.49581	1.43261	0.168184	0.357003	-0.926452	1.78749	-0.461622	-0.45888	-1.23514	0.116601	-0.0984848	0.413375	0.54549	0.546036	-1.30754	0.234659	-0.501057	-0.4337	0.24725	0.538056	-0.899903	-0.657618	1.25646	0.00736754	-0.14871	0.11606	-1.50646	0.679633	-0.886616	1.01917	0.758879	-0.717315	0.0592964	-0.851291	0.144103	0.659634	-0.0116646	0.29516	-0.898489	0.837488	1.45621
-6.99152	-1.14847	0.788328	-2.03662	2.17815	-0.849795	3.01843	-0.133208	-0.405713	-0.721628	0.169326	1.82138	0.865771	-0.0736618	-0.326415	-2.84621	-1.61543	-0.609999	-0.398513	0.261957	-0.404393	-0.810688	-0.783548	0.0546623	0.0360402	-1.79258	-0.132957	-0.129991	-0.283778	-0.390324	-0.479952	-0.826215	0.809806	-0.425647	0.454124	-0.495555	0.108405	0.404698	-1.79037	0.256984	-0.203877	-0.95891	-0.222249	-1.4628	1.27149	0.545163	-0.453797	0.358923	0.146016	-1.03843
-10.9267	-1.27069	0.114845	-1.71583	-2.12035	-1.38651	0.638184	-0.505047	-0.864276	-0.823966	-1.49562	0.51826	-0.524015	0.392582	-0.259859	-0.395599	-0.66301	1.04145	-0.0195659	-0.1036	0.366058	0.0829349	0.260032	-0.238891	-1.09571	0.974758	-0.51523	-0.192865	0.410806	-0.773526	0.117994	-0.219733	0.625018	0.0960822	0.402662	-0.360705	0.90175	-0.703439	-0.661043	0.322556	0.146233	0.445497	0.0615511	-0.184457	-0.151274	-0.451496	-0.0279312	-0.310151	0.300903	-0.602656
-8.29657	-3.60688	-1.19555	-1.3675	-0.756885	0.127724	-0.318765	0.203081	-0.509069	1.94058	0.926974	2.23237	-0.0784485	0.446141	0.087889	-0.653946	-0.847004	-0.495723	-0.29837	-0.959478	-0.316244	-0.835417	0.893709	0.407839	0.27733	0.399276	1.20742	0.00903623	1.13315	-0.848252	-0.536157	-1.31258	0.0174893	-0.817461	-0.360556	-0.164314	-0.164977	-0.208296	0.307496	0.403433	0.137207	1.63572	-0.388385	0.440402	0.420651	-0.434825	-0.559696	-0.194935	0.746483	0.230668
-0.0841418	0.222195	2.86574	-3.93136	0.0651413	1.85222	-1.65113	-1.23978	0.512232	0.45782	2.60289	0.188221	-0.711347	0.32566	0.843791	-0.062592	-0.756441	0.358327	-0.728278	-2.31377	-0.385401	2.37238	-0.422326	-1.05298	-0.737657	-0.706954	0.0224031	0.344648	-1.2819	-0.0819947	0.492541	-0.360917	0.409854	-0.345496	-0.546823	0.291052	-0.468326	-0.665948	0.388287	0.0423742	1.03523	-0.481558	0.190236	0.269676	-0.606669	-0.0554943	-0.759292	-0.381296	0.665197	0.233753
-14.1821	2.97171	-0.304265	0.459145	0.288471	0.111551	-0.485824	1.57211	0.0913875	-0.231917	1.54973	0.350565	0.948544	-1.57115	0.0960584	0.127653	0.519335	0.40871	-1.56237	0.517414	-0.416622	1.01127	-1.11302	0.796566	0.466765	0.458478	0.22096	0.426905	0.726907	0.269731	-0.36537	0.759614	0.660445	0.363875	-0.0967497	0.9825	-0.906422	-0.394542	-0.520141	-0.901146	-0.566934	0.907725	0.565569	0.0840833	-1.27199	-0.175519	-0.352576	-0.383312	0.597189	0.302488
2.70839	3.58549	-1.88365	-0.929394	-0.22083	-0.268535	0.654157	-0.989652	-1.09545	-1.76965	1.77309	0.0196049	1.45379	-0.695227	0.78817	-0.129938	-0.573615	0.984533	0.371308	-0.452272	0.577642	0.341165	0.866448	1.08599	-0.851763	-0.858788	-0.129217	0.432375	0.0579531	-0.210209	-0.793982	-0.0894259	0.297792	-0.087526	-0.0538793	0.429416	-0.325142	0.651356	0.668212	-0.913265	1.10207	-0.537723	0.395055	-0.953766	1.0062	-0.942913	-0.862475	0.226674	0.599372	-0.787012
-7.4187	7.09992	-0.171129	-1.61329	1.39421	-1.10465	2.52942	-1.00407	0.844394	-0.846851	0.294441	1.40047	-0.695793	0.660908	-1.584	-0.561805	0.398443	0.118534	-0.357556	-1.01933	0.507488	-0.252143	-2.57044	0.024766	-0.219861	-0.391059	-0.359362	0.963115	-0.358853	-0.163282	0.481334	-1.01796	0.51936	-0.434571	0.755138	-1.56699	-0.792715	-0.380975	-0.314118	-2.07878	0.451339	0.455711	-0.854838	0.558737	0.659659	-0.485568	-0.307945	-0.538973	-0.73582	0.935712
-11.1693	1.12984	0.120834	0.608514	-1.63195	-0.769597	-0.790662	-0.634302	-0.85279	-0.571828	-2.38382	-0.284095	-0.418018	0.324507	0.993516	0.15338	-0.217049	-0.263138	0.312461	-0.0245628	0.0946786	-0.361743	-0.643	0.49295	0.302117	0.63126	0.359966	-0.428284	-0.969869	-0.0316618	-0.413013	-0.789117	-0.47357	0.566789	0.0626979	0.0207849	0.0476248	0.454155	-0.864444	-0.761303	1.03134	0.563703	0.299707	0.174315	0.582501	-0.456097	-0.0286027	-0.611244	0.133662	0.512843
-0.183217	0.958354	1.21948	1.94198	2.34939	-0.616319	-0.267454	-0.195642	0.519495	-0.411611	-0.403657	-2.15352	-0.364978	0.625292	-0.34284	-0.514879	1.30277	-0.795656	0.779435	0.348678	-0.792624	0.972225	-0.0931401	-0.101429	-0.793678	0.760023	-1.17998	-0.309164	0.648872	-0.227358	0.8741	-0.0517648	-0.332951	-0.322813	0.455192	-0.448191	0.368091	0.794255	-0.425113	-0.434812	0.532568	1.04789	0.212869	0.46932	0.365656	-0.910396	-0.08962	-0.0747529	-0.373499	0.782457
-7.44709	-3.22512	0.832376	-5.17198	-2.40954	1.38375	0.448398	-2.2712	-1.1332	-0.287143	1.31801	0.197748	-1.7961	0.417813	-0.113694	1.28967	0.0203111	-0.049043	1.05934	-1.80165	-0.78005	1.01196	0.0365452	-1.16206	0.233212	0.520136	-0.462717	0.558405	-0.623858	-0.0879943	-0.153846	0.671587	-0.1679	0.862714	-0.485881	-0.0052952	-0.0939361	1.23274	-0.530478	0.12703	0.0593072	0.473598	-0.482664	0.762832	0.236274	-1.52808	0.375175	1.01261	-0.936641	0.0853085
-10.1471	1.22963	-2.00503	0.916874	0.8379	1.63732	2.92445	-2.46295	-0.121005	-0.303615	-1.19794	0.286422	-0.68177	0.687844	0.336007	1.23695	-0.530402	0.569148	-0.394539	-0.456407	0.665597	0.507173	-0.048088	0.0390928	-0.628771	-0.0478725	-0.788226	-0.521051	-0.144775	0.937967	0.698664	-1.26117	-0.811372	-1.45898	-0.342304	-0.554505	-0.123528	0.0635952	0.700994	-0.0734583	-0.334709	0.202978	-0.457873	-0.605354	0.116337	0.272763	0.707875	-0.103515	1.08752	0.118762
-10.7814	-3.11869	-0.628207	-2.28051	2.12869	-0.265159	-2.40757	1.44494	-1.00207	-1.81796	-0.643082	-0.43539	0.349705	-0.645212	-1.32996	0.938471	0.770113	-0.303561	0.361863	0.0095692	-0.91341	0.0785392	-1.09949	0.250258	-0.035801	0.850634	-0.959294	-0.742709	1.35272	0.694229	-0.254912	1.14835	-0.461917	-0.817931	-1.16807	-1.31514	1.38031	0.983113	-0.442634	-1.25347	-0.843024	0.00377132	0.151365	-0.846093	-0.359657	0.186935	0.311611	0.244385	-0.252435	-0.888116
-9.89782	-1.09589	0.582856	-0.1933	0.811809	0.103525	0.477639	0.408259	0.636438	-1.94119	0.0886264	-1.38156	1.14396	-1.02805	1.10644	0.211503	-1.28867	0.324768	-0.182166	0.808945	-0.73914	0.2945	1.27066	0.254617	-0.238236	0.0175966	-0.297945	0.88042	-0.878277	1.17856	1.50043	-0.990054	0.0289375	-0.527385	0.815378	-0.695288	0.590857	0.922834	0.390509	0.447769	-0.587706	0.048558	-0.292217	1.04824	0.661208	0.197267	0.270388	0.269227	0.089481	-0.885923
-2.17061	-2.15518	2.89101	-1.11375	0.069213	0.539235	-1.14505	0.928927	1.14283	-0.21465	0.36112	0.00579572	0.755525	-1.28455	-2.41541	1.36565	1.80105	1.26828	0.0169277	0.605381	-0.427708	-0.0064718	0.277956	1.07009	-0.184427	-0.174839	0.157919	-0.76133	-0.115602	0.222824	0.429524	-0.451491	0.401239	-0.365859	0.693189	-0.442198	-0.604604	-0.0878844	-0.0148413	0.449191	0.11587	0.324923	-0.0682359	-0.210863	1.32017	-0.509741	0.613379	0.254456	-0.573758	-0.257935
-2.38153	-0.543637	1.09984	-0.330063	-1.28401	1.74458	-0.828672	-0.131669	0.136768	-1.23482	-0.797868	-1.56682	0.726828	0.242775	0.312734	-1.18769	-0.907679	-0.23852	0.407982	-0.753513	0.504108	-0.619236	0.586039	-0.638913	-0.0629357	-0.903991	0.106472	0.582567	-0.333718	-0.411965	-0.510221	-0.848519	0.48031	0.387932	-0.315452	-0.369181	-0.0874721	0.0489784	-0.426143	-0.831321	0.346997	0.372353	0.445405	-0.593758	0.143344	0.0552551	0.422347	0.461487	-0.432113	0.494096
-1.66024	-0.522153	0.327096	-1.59368	1.0744	3.22193	1.87642	0.771669	0.718569	-0.135835	-0.38431	-1.43399	0.048098	-0.288659	0.992635	1.13118	-0.606736	-0.0311055	1.03829	0.557819	2.04989	-0.454277	1.1375	0.728482	-0.582242	-0.414926	0.610922	-1.32752	-0.164059	0.358704	0.15512	1.02017	-0.0134728	0.464572	1.77751	0.0427528	0.127007	-1.03185	-1.06901	0.286041	-0.0115641	0.0473155	0.295193	-0.558304	0.327518	0.0194491	0.826997	0.00554039	-0.0895755	0.341852
-6.85818	2.92852	-0.0612011	-0.197901	-1.04615	0.295715	0.909646	-0.0437467	-0.00526428	-0.208442	-0.937747	0.436759	-0.190325	-0.382011	2.1096	0.228478	0.842614	-0.494765	0.396824	-0.48227	-0.353855	1.03081	0.693978	0.178762	0.522194	0.351629	1.08639	-0.215528	1.35055	0.212593	-0.478197	-0.653253	0.592571	-1.34485	-0.0115119	-0.0169247	0.297507	0.582066	-0.348898	0.211425	0.0407641	0.647703	0.15526	-0.25794	-0.0524236	0.236045	0.895525	0.160492	0.631562	0.626629
-11.3294	-1.46152	-1.04503	-0.458493	-1.92389	1.91288	-1.57322	-0.763713	-1.18716	1.07693	-0.314064	0.239933	0.482388	-0.0278783	-0.383303	0.141463	0.786941	0.12872	-1.90421	-0.251494	0.0587052	-0.2076	1.10998	0.281143	-1.24338	0.315897	0.123893	-0.873104	0.629016	-0.4861	-0.102459	-1.42066	1.23343	0.426715	0.66009	-0.213725	-0.204259	-0.412423	0.691834	0.887906	-1.10861	0.6185	-0.141656	-0.130239	0.525896	-0.637498	0.83358	-0.15627	0.0915999	0.122589
-2.4247	0.520367	0.3064	-0.984026	-0.251372	0.846484	0.607143	1.27462	0.0280317	-1.04399	-1.11421	-0.358065	-0.543126	0.984207	-1.70698	-0.837193	-0.927476	-0.944328	0.978964	-0.614808	0.48394	-0.141672	0.727154	0.846089	0.599762	0.255185	-0.708834	-0.698594	-0.861097	0.0823742	-0.34539	0.664915	-0.0204988	0.64631	0.602473	-0.84154	0.725267	-0.739313	0.748464	-1.01794	1.32297	-0.598868	0.437098	-0.227083	0.503236	-0.453107	0.461477	-1.57506	-0.765875	0.0586303
-14.4347	6.24613	-0.399606	-0.111867	-0.266677	-0.153814	0.79494	3.07949	0.466751	-0.244043	1.4117	0.275321	-0.364741	0.398618	-0.629225	0.0721375	-1.68459	0.108768	0.572239	0.393348	1.05169	0.886848	0.715167	0.633874	0.831935	0.118459	0.255884	0.755314	-0.474035	-0.801757	0.905521	-0.313631	-0.0361922	0.349765	0.113258	-1.51159	1.55985	0.198296	-0.518221	0.213249	0.488491	1.41172	0.955582	-0.427799	-0.269648	-1.4726	0.601142	1.10223	-0.68111	-0.380803
-6.68322	1.28473	-0.892463	-2.69934	-0.808833	1.30569	-0.838314	-2.44133	1.27015	-0.774045	-1.35731	0.855077	1.31343	1.07017	0.298398	-0.206706	-0.00988377	0.137386	-1.04995	-0.417121	-0.770445	1.25556	0.089511	0.895419	0.519843	0.212867	-0.760426	-0.342003	-1.39451	-1.58766	0.828684	0.287992	0.495569	0.0344234	-0.45085	-0.189167	0.267393	-1.06977	-0.971114	-1.72363	-0.673054	-1.09944	-0.00577359	-0.502558	0.853075	0.0345434	-0.559343	-0.304614	-0.734897	-0.586925
-2.29174	1.87707	-0.685277	2.88324	1.59985	-0.449034	1.8862	-0.659721	0.20113	-0.0562103	-0.186647	0.258436	-0.922489	-1.73427	-2.30507	-1.00377	0.936921	0.501206	-0.0586502	1.1432	1.45959	0.678575	0.646976	-1.13794	0.229432	-0.628145	0.465345	-0.262594	0.559286	0.379273	0.0215385	0.221222	-0.592506	0.422478	-0.862636	0.173381	0.512741	-1.37703	1.18117	0.222185	-0.0474047	0.252417	0.883922	0.974465	-0.598307	0.725886	0.545236	0.211955	1.08472	-0.0728341
-12.8796	1.06197	-1.49631	-1.55012	-0.363458	-0.243326	-0.0502501	0.815269	0.116449	0.381646	0.545607	1.34239	0.97329	1.08625	0.680607	-1.25752	-0.891331	0.885777	-0.462133	0.829309	-0.78146	1.03746	0.725889	0.0347747	-0.553586	0.00803581	0.426617	-0.908207	-1.78153	-1.2958	-0.204547	0.559023	1.28963	-0.347636	-0.166764	-0.503422	-0.67197	-0.246853	1.13516	-0.345201	0.163265	-0.415891	-0.19303	1.34177	0.455796	0.220764	-0.236114	-0.623115	-1.03845	-0.120148
1.90878	0.518603	2.44512	-4.47378	1.55761	-0.903517	0.12469	-0.631856	0.566014	-2.44582	-0.0453074	0.140731	0.195103	0.543938	0.0467829	-0.179658	0.328424	0.195613	-1.01696	1.28417	-1.71387	-1.38735	-2.10158	-0.917208	0.0916967	1.65099	-0.85306	0.296668	-0.304171	0.506126	-0.289524	-1.18939	0.570934	0.274222	0.927253	0.049963	0.5272	1.28768	-0.109493	-0.52324	-0.0614847	0.211561	-1.0868	-0.102816	-0.309756	1.04392	0.0699686	-0.437658	0.617577	-0.717314
-0.537726	4.96763	3.63419	0.261877	-0.111365	0.228608	-2.29875	0.950626	1.13679	-0.86531	0.230007	1.04763	-0.772348	0.0870216	1.01232	0.849886	1.81015	1.77357	-0.258081	0.827692	0.0452669	0.561446	-0.822132	-1.31487	-0.104305	0.526298	0.999846	0.237561	-1.47602	0.301895	-0.435839	0.106532	-0.182596	-0.356742	0.0641192	1.11998	0.670266	-0.483819	0.316028	1.45745	-0.742784	-0.963823	1.28397	0.335356	-0.155141	0.158331	-0.133586	-0.624376	0.152033	-0.198468
-3.45675	0.282241	-2.19547	-1.24142	-0.785788	1.59225	0.0213968	0.887435	-1.29062	-1.07392	0.736434	-0.016889	1.29748	0.458467	-0.526749	-0.10508	-0.292543	-0.797885	-0.802399	0.200134	-0.169762	0.613123	0.588398	-0.120941	0.274555	1.88747	-1.25235	0.609942	-0.0863421	1.26656	-1.09668	-0.790641	-0.24236	-1.60709	-0.217783	1.16137	0.980103	0.429249	0.421879	-0.4153	-0.341095	-1.42007	-0.867832	-0.0728662	-0.906322	-0.643732	-0.123416	-0.210798	-0.321256	-0.420636
-10.1188	2.85033	-1.31871	2.35062	-1.99648	1.50914	1.22161	-0.692688	0.82149	-0.570977	0.117161	1.34137	0.674018	-1.52768	0.343696	-0.532867	0.028827	-1.93823	-0.594611	-0.0499835	0.0780816	-0.73485	0.0610697	-0.0161335	0.880267	-0.670727	-0.0103467	0.194697	-0.415491	-0.314019	-0.257963	0.479498	0.192557	0.544133	1.36534	-0.803021	-0.552058	0.385094	0.525497	0.298669	0.033234	0.481743	0.552029	-0.542722	-0.49949	0.525365	0.305169	1.12674	0.250108	-0.0207623
-3.53502	2.18618	1.27701	-1.12952	-1.90544	-0.422403	1.36627	0.239278	-0.0935366	-1.09315	-0.153535	-1.72203	-0.857655	-0.440567	1.35614	0.11482	-0.578056	1.02396	-0.214881	-0.259378	0.0213383	-1.16205	-0.715107	0.690337	-0.409618	0.0956491	-0.382522	0.966475	-0.514292	-0.392411	-0.368642	-0.0982003	-1.03236	-0.00916519	-0.0345687	1.89049	0.402549	-0.435126	0.232038	-0.266273	-0.42289	-0.506397	-0.603267	-0.106731	0.382829	-0.869708	-1.04898	0.974074	-0.319958	0.08194
-12.0813	0.570655	-0.335383	1.46181	0.115114	0.0303221	-1.5407	0.689521	0.0251854	-0.760779	0.218027	-2.47305	-1.42159	-0.0857977	-0.71945	-0.417501	1.40183	0.346529	-0.114339	-0.97195	0.0798602	1.13748	-0.108441	0.537122	0.215724	-0.0219418	0.833292	0.30327	0.337939	-0.951548	0.0567175	-0.124673	0.431728	-1.57232	1.00721	-0.369785	0.244825	0.349267	-0.547284	0.214808	-1.12896	0.511008	0.0238746	-0.0896646	-0.463665	0.638765	0.826826	0.246907	0.398219	-0.00647586
-12.4357	0.531874	-0.285095	0.674519	-0.558137	1.18611	0.222323	0.780665	0.44439	-0.0682291	0.80873	-0.810912	0.371858	2.20153	-0.601895	-0.0142738	-0.372914	0.444942	0.708834	-0.0157191	1.46633	0.239749	0.196573	0.803655	0.3284	-0.527562	0.332726	0.211834	0.776747	0.0962966	0.940133	-0.525131	0.0252145	0.102414	-0.0902838	-0.562026	0.0293228	0.114529	-0.58679	-0.255728	-0.185952	-0.113088	0.349435	-0.169289	-0.868609	0.792335	-0.117698	-0.5933	1.10906	0.376543
-3.96214	2.63706	1.00139	-0.581473	0.621278	0.858871	-0.688261	-1.14505	-1.25094	-1.30474	-0.195725	1.32683	1.17614	-1.1345	-0.802501	1.0308	-0.28359	0.859106	-0.570241	-0.171319	-0.196597	1.10837	-0.461022	-0.138601	-1.38998	0.381983	0.769053	-0.805601	0.250617	-0.181179	0.64091	-0.563122	-0.172709	-0.836812	0.854506	0.50716	0.587109	0.436589	0.0336702	0.059643	-0.473035	0.678809	-0.324976	0.0207888	-0.718774	0.877393	-0.296445	0.833054	-0.575313	0.521271
-6.13879	-1.56492	-2.75732	-2.12289	-1.23996	-2.50476	0.484678	0.114287	-0.582932	0.393915	0.170782	-0.418759	-0.229525	1.04953	-0.0219919	-0.712742	0.902032	1.31309	0.645093	1.08426	0.454398	-0.201695	0.883327	-0.58828	1.70508	0.551776	-0.0498346	0.207719	-0.755973	0.203391	0.522989	-0.676807	0.580646	1.06443	0.81315	0.360552	0.00317438	-0.071025	-0.381294	0.075951	0.297188	-0.732264	0.32962	0.198485	0.5364	-0.580768	-0.245629	-0.0106759	-0.680304	-0.0700166
2.71909	-2.25186	1.90565	-0.415497	-0.418211	-0.0903463	1.78189	0.770986	0.948354	-0.233516	1.41207	-1.93003	-1.63656	0.580878	0.958123	0.60333	-0.259863	-0.285164	-0.714381	1.32845	0.132004	1.50144	0.577854	-1.61046	0.639068	0.361446	-0.561938	0.353224	0.184741	0.172929	0.641275	0.933938	0.578841	0.772052	-0.458109	0.677414	0.497447	0.498434	-0.131649	0.744657	-0.00919466	0.441122	0.552661	-0.149096	-0.0898398	0.275394	0.511915	-0.388612	-0.130965	-0.167846
1.86654	-0.784106	-2.07079	-2.08763	-1.45056	-0.00280108	1.12778	-1.34284	1.6908	0.0985674	1.76489	0.0381213	1.16272	-1.60941	-0.0368553	-0.74407	0.260037	-1.27363	-0.176878	-0.179505	-0.848428	-0.643392	0.204895	0.173837	-0.847224	-1.29369	-0.290798	0.27177	0.791955	0.682851	-0.502135	-0.639292	0.0644943	-0.325214	-0.653951	-0.0470652	-0.5334	0.685737	-0.103753	-0.274029	-0.00628257	0.293431	-0.526251	1.31761	0.973901	0.217908	-0.514292	0.0963128	-0.997757	0.733165
-8.59451	1.9305	-1.25085	-1.88011	-0.780108	0.166003	1.27721	0.395757	-1.32589	0.227925	-1.70598	-1.0808	-0.428288	0.0764287	0.278738	0.0351606	-0.0882312	0.110825	-0.39211	0.281202	-0.541583	0.216326	1.16482	0.815251	0.694241	-1.66391	0.149256	0.857697	-0.36936	0.00953978	0.0578083	0.16157	0.252208	-0.912803	-0.315978	0.331345	0.689804	0.501215	-0.164224	-0.144038	-0.3705	-0.00786278	0.986355	-0.591048	0.53725	0.211237	0.360265	0.00523234	0.353744	-0.22739
4.74748	-1.70832	-3.85991	0.0310023	-1.89697	-2.26459	-0.918212	1.06934	0.140558	-1.06537	2.67201	-0.251587	0.252027	0.495769	0.370113	1.04587	1.34498	0.169197	0.477879	-0.33652	-0.0311484	0.243422	0.490098	1.01755	-0.135169	0.375298	0.985378	-0.442427	-0.225238	-0.20076	-0.206166	-1.10883	0.945601	0.12882	-0.868574	-0.210341	1.61728	-0.182014	-0.20286	1.06209	1.09255	0.0728612	-1.01647	0.0230463	-0.19112	0.76822	0.299107	-0.833007	0.117033	0.280062
-4.48163	-3.44915	1.19184	-4.08487	0.328378	-1.91451	1.27155	-1.35313	-0.666413	1.34757	0.376375	0.51095	-0.100282	0.809606	0.856388	-1.58688	2.80677	0.0404997	0.126584	-0.314266	0.937335	0.700175	0.676878	0.870201	0.449178	1.3299	-0.835322	1.45174	-0.529888	-0.379389	-0.133204	0.500886	-0.668484	1.49555	-0.627151	0.245655	-0.364921	-0.645209	0.71277	-0.811621	-0.708108	1.09923	-0.829901	0.0284761	0.150491	-0.682067	-0.470735	-0.270496	-0.963865	0.512611
-9.50152	5.0308	0.41951	0.267691	-1.32317	0.741498	0.607247	0.78405	1.76452	0.639156	0.0312262	-1.93368	0.299131	0.602523	-2.24873	-2.30817	-0.125815	1.02399	0.524989	-0.0856958	-0.0602871	1.07286	0.216422	0.710134	0.135441	-0.525209	1.3537	0.0261375	-0.080231	1.12417	-0.454589	0.442262	0.673378	0.669983	0.408085	1.09621	-0.504417	1.07195	0.816818	-0.505079	0.891924	1.12545	-0.602539	0.0958059	0.0815835	-0.10343	-1.01251	-0.373882	-0.265193	-0.210048
-9.72046	3.97765	1.01766	0.167248	-0.067206	0.187738	-1.03291	0.348374	-1.2987	0.828727	-0.836776	-0.57244	-0.810582	-0.976262	0.969615	0.802008	0.023773	0.394552	-1.49478	-0.730586	-0.53913	0.0121137	0.494382	0.448823	-0.287407	-0.0377297	-0.0481298	-0.557769	-0.744845	-0.0552291	-0.47049	0.37842	-0.0823075	0.312998	-0.248917	-0.0190231	-0.500912	-0.450971	0.786313	0.0818604	-0.97207	-0.402247	-1.05121	1.00726	0.21362	0.439418	-0.462178	0.901253	0.388383	0.562717
-7.51709	-0.668187	-0.957731	0.556322	-1.46941	0.822847	0.200521	2.58596	-0.121223	1.06073	-0.0196162	-0.564535	1.06006	-2.03989	0.631082	-0.250178	0.10056	0.0406047	0.940248	0.879383	-1.12449	0.970592	0.461915	0.219548	0.564528	-0.593957	-0.768493	-0.0798325	0.676288	-0.248312	0.108154	0.182237	0.025975	-0.385785	0.139962	0.883588	-1.41667	0.667796	0.901866	0.665332	-1.74803	-0.0200902	-0.0916991	-1.02807	-0.00321786	-0.0420814	-0.132685	0.607892	0.312977	0.00292302
-7.65116	-0.390381	-0.966179	1.61471	-1.25453	0.671038	-0.740695	-0.223999	-0.907129	0.630994	0.383718	0.288267	0.0443924	-0.481825	-1.19351	0.660251	-0.0623823	-0.737773	-0.516734	-1.03303	1.71851	0.429706	0.451723	-0.454772	0.297128	0.635351	-0.210558	-1.33509	-0.407832	-0.647121	0.130074	1.2026	-1.33919	0.0810198	0.280397	-0.657038	1.02946	0.543183	0.708472	-0.230157	1.42734	-0.0675594	1.11016	-0.47848	-0.520133	-0.298289	-0.159081	-0.282663	0.0170394	-0.492009
-3.70813	-1.07318	-0.373855	-1.48357	-0.760337	-0.0802709	0.717248	0.784211	-0.424874	-2.03478	0.273981	0.161745	-0.533721	-0.941692	0.979241	-0.154286	-1.42642	0.212696	0.588663	0.674818	1.09407	0.388302	0.840481	0.0875678	0.0133302	-0.441093	-0.134789	1.20892	0.117161	0.599836	-0.0820147	-0.524247	0.655461	-0.299674	-0.438674	0.83597	-0.498914	-0.591142	-0.454925	0.708238	0.600019	0.421695	-0.146992	0.561597	-0.133835	5.88009e-05	0.383834	0.168749	-0.0732738	-0.699741
-19.4453	-0.71685	-2.11151	0.195618	-1.6985	-0.310827	0.562833	-1.47641	0.603731	-0.00894896	-0.230699	-0.548919	0.656447	-0.77845	0.0245314	-0.64061	-0.31888	-1.29469	-0.429723	0.18982	-0.574724	0.213718	0.665508	-0.641895	-0.657253	-1.2624	1.29456	-1.06266	0.284449	-0.202274	0.347596	0.833941	0.445951	-0.842787	-0.701594	0.938441	-0.127573	-0.435855	0.5049	0.437398	-0.641844	1.75779	-0.859674	0.370089	-0.0156345	-1.01845	1.17717	1.04693	0.709673	-0.600342
-2.07556	1.53831	-0.280135	-1.89474	0.910617	-2.11216	-0.0858784	1.56158	0.470693	-1.08609	2.31855	-0.165199	1.53305	0.0212849	1.14968	-0.62525	1.23866	-1.28071	-0.318328	0.466791	0.735531	-0.760978	-0.289144	1.1261	0.0207505	-0.662742	0.144824	0.438205	-1.06271	-0.884806	0.392785	-1.05943	0.566474	-0.503023	0.844985	-1.02332	1.01945	-0.389317	0.392054	-0.924364	0.83472	0.0720475	-0.130352	-0.127355	-0.70033	0.504883	0.242049	-0.278762	0.27179	-0.160483
-8.97632	-1.49483	1.02038	-1.46329	-1.29064	0.193955	-0.420384	0.311293	-0.204511	0.0242296	-0.552662	-0.524937	0.242264	-0.435649	0.711745	-0.867462	1.04453	-0.806888	0.0633052	-1.01422	0.993635	-1.34936	0.553435	1.09837	0.0182697	-1.52724	-0.8393	1.21519	-0.879405	0.239323	-0.25208	-0.302911	0.643684	0.742324	-0.864067	0.533203	-1.0171	0.111768	0.392423	0.882802	-0.181878	0.123209	0.727875	0.485132	0.723025	0.349144	0.569905	-0.0781709	0.553336	0.46424
-4.04013	1.43451	1.00042	-5.00448	3.19779	1.58152	1.47717	0.503874	1.66885	-0.503496	-0.878691	-1.08487	-1.21171	0.0723658	0.269437	-1.20534	0.305847	-0.751763	1.08263	0.0674844	-1.09544	-1.83501	0.939402	-1.36901	-0.239013	-0.297103	-0.0587768	-0.269278	-0.859733	-0.910956	-0.543135	-0.841566	1.03273	-0.342423	-2.15675	-1.109	0.432063	1.88895	-0.188745	-0.0614712	0.122221	0.19038	0.667079	0.365901	-0.968325	0.0611895	-0.208375	-0.189265	-0.317235	0.234628
-13.7037	-0.207664	-2.37245	0.867235	0.309774	-0.771826	-0.526724	0.533935	-0.854261	0.0821218	0.601832	-0.943847	-0.285971	-0.219913	-0.417204	-0.0717547	0.273727	-0.393375	-0.56788	0.339402	1.0133	0.0678667	1.20331	0.469109	-0.102247	0.572706	0.700319	-0.832715	-1.01383	0.26702	-0.122007	0.443088	-0.67997	-0.0876402	0.692299	-1.3114	-0.0728006	-1.74965	0.499242	0.0452228	1.33506	0.311531	-0.45668	-1.75829	-0.141696	-0.0934816	-0.766518	0.258043	0.0849107	-0.199657
-14.3945	-0.542719	0.513599	1.28339	-2.39772	-0.961858	0.0820704	-0.861949	1.74458	0.196125	-0.0391033	0.285908	-0.324691	-0.638407	-0.46369	-0.657665	-0.603647	-0.681232	0.170794	0.394822	-0.0908954	-0.0790744	-1.30117	-1.19574	-1.18965	-0.466533	-0.192963	0.881219	-0.58727	-0.174984	-0.0548942	0.391871	0.306864	-0.373556	-0.291654	0.710713	0.461382	-0.606194	-0.101517	0.365782	-0.246099	0.666951	-0.495233	-0.405348	-0.149867	-0.193931	0.21424	-0.282378	0.640684	0.453205
-6.89668	0.118693	-3.53209	-2.28835	-2.06086	1.23534	-0.37173	2.65951	-0.150675	1.38463	2.43435	-1.39793	0.0270887	-0.625943	0.156783	-1.3528	0.95558	0.242496	-0.73846	-0.320695	1.10668	-1.57639	-0.509943	0.718289	1.19784	-0.308762	0.904056	1.33501	-0.783294	-0.0144118	0.289225	1.43177	0.858343	-0.479727	0.0438072	0.0346019	-0.612503	0.306783	-0.0572247	0.382505	-0.195209	0.186798	0.225855	0.274448	-0.29299	0.741916	-0.11861	-0.299066	-0.12206	0.348204
-7.96135	-0.409695	-0.879425	-3.30804	0.802409	1.72841	-0.593084	-2.12691	0.509015	1.39895	1.39126	-0.276451	-0.529205	-0.32371	-1.21616	1.59911	0.744465	0.0836453	-0.362991	1.27904	0.454695	2.02275	-0.608267	0.274359	0.89222	0.676195	-0.0777831	1.60072	-0.100504	-0.244841	-0.437939	-0.117615	-1.41588	-0.171685	0.929646	-0.130687	-1.18726	0.172397	-0.708215	0.217951	1.01762	-1.16222	0.769895	0.0356288	0.591814	0.793221	0.769307	-1.37725	0.00560872	0.831326
-3.60644	0.965948	-2.03755	-4.91191	3.9182	0.432966	1.37094	1.4983	-1.14213	-0.102736	2.31666	0.447183	-1.1314	0.307045	-3.41898	-1.26533	-0.320058	-0.291824	-1.00985	0.338046	-0.0835285	0.170832	-0.229721	-0.930255	0.100384	-0.321482	0.865871	-1.58875	0.17597	1.72573	-0.604032	-0.482585	0.0768345	0.836278	0.551138	-0.23782	0.396953	-0.565081	-0.0364646	-0.799326	-0.176352	-1.58212	0.942686	-0.244685	0.284947	-0.162249	0.303276	-0.17058	-1.44915	0.297413
-5.17297	0.349324	1.39314	-1.03185	-0.232585	-0.574981	-0.959426	-0.182581	-0.314451	1.04981	2.33433	0.895592	0.637114	-1.74591	-1.1181	1.61433	-0.445803	1.36522	0.247531	-0.569345	0.710444	0.127591	0.100104	0.107702	0.0816679	0.343695	-0.061613	-0.60537	-0.288413	-0.0243976	-1.29987	0.496803	-0.0775972	0.379733	-0.880415	-0.511073	-0.124775	0.313307	0.197755	1.04796	0.639216	-0.318013	-0.878183	-0.557338	-0.625763	-0.619873	0.470946	0.164547	0.828559	-0.109205
-23.1439	1.68935	-3.42792	1.03927	-0.228645	0.431754	-0.897605	-3.46284	-1.81238	-2.01983	-0.326801	0.486365	0.1126	-0.96105	0.587824	0.408925	0.146086	0.445375	-0.509862	0.497152	-1.24851	0.298014	-0.0937255	1.44261	-2.05241	0.173876	-1.22606	-1.55065	1.13139	-0.608854	0.542402	0.327563	0.383147	-1.12256	-0.0263735	1.46419	-0.283387	-0.505645	0.55426	0.174293	0.934987	0.637619	0.512972	0.334438	0.330438	-0.0802466	0.188955	-0.922928	1.50644	0.297568
-3.86612	0.418545	0.657945	-3.08844	1.4235	0.205226	-0.875667	-0.940709	-1.36708	1.57339	1.57775	0.0835509	0.767111	1.07428	0.363643	-0.0131036	0.404074	1.29228	-1.5704	-0.569146	-1.83857	-0.845127	0.693758	0.170583	-0.390776	1.15455	0.281272	-1.49242	0.474254	0.138854	0.522678	0.190307	0.851444	-0.759545	-0.125423	-1.14515	0.00163666	-0.142094	-0.410273	0.644334	-0.235734	-0.0912136	-0.305487	-0.804287	0.725199	-0.310523	-0.0544622	0.156852	-1.37035	-0.645969
-5.76525	1.06686	0.112296	0.468541	0.476063	0.0326452	2.31115	-0.37722	-0.0554704	0.574205	0.991601	0.822837	-0.874031	-0.370389	0.360409	0.159837	-0.786959	0.703934	-1.7608	1.56039	0.113846	0.507516	-0.216829	-0.125266	1.47846	0.0810385	0.47417	-0.00418586	-0.194796	-1.09286	-0.752239	-0.3571	1.44443	0.25119	-1.08798	0.228408	-0.0395675	0.500375	1.0597	-0.926458	-0.443743	0.201621	0.885968	0.585617	-0.82635	0.823814	-0.136322	0.412717	0.242591	0.419643
-16.9796	5.3167	1.34739	0.220298	0.648925	-0.563181	-0.494111	-0.445785	0.0158141	1.8989	0.517062	0.650408	0.685706	0.121932	-0.460103	-0.33129	-0.211805	-1.0684	0.164662	0.713862	1.0408	-0.224316	1.60171	0.987145	0.600428	0.0714186	-0.418643	-0.589111	0.569475	1.69989	0.47807	-1.22668	0.234396	0.205358	-0.479803	-0.780316	1.08384	0.304995	0.0454481	1.6365	0.740527	0.350143	-0.760102	-0.0098653	0.782338	-0.223457	-0.438588	0.335626	0.857903	0.28616
-25.5109	2.13681	-1.93214	-0.0304146	3.82194	-1.12313	-2.94485	0.842495	0.649788	1.53531	3.07403	2.72475	1.87174	-1.13492	0.625702	-0.92426	-0.484625	-1.45059	3.35846	-0.949383	-0.601974	0.34626	0.54131	-0.547453	-0.403221	-1.27037	-0.224777	0.161823	0.0938029	0.758982	-0.311827	0.934073	0.286839	0.692993	0.634925	0.529093	1.16982	-0.816546	0.0304545	-1.15157	0.0569095	1.11223	1.0245	-0.245872	-0.934814	-0.531552	0.0313816	-0.46906	-0.127505	-0.400996
-10.7818	1.33232	0.215082	-0.472825	1.44804	0.270104	1.21827	1.04214	-1.71747	-2.60072	-1.21472	1.05416	-0.74991	0.898622	1.8729	0.407657	0.273966	0.585951	-1.61207	0.240565	0.0260172	-0.742616	0.458866	-0.588528	0.184958	0.186542	0.805163	-0.908832	-0.180041	-0.452616	-0.86994	0.384931	0.642253	1.13278	0.0348871	-0.636937	-0.19058	0.0590098	-0.286568	-0.287682	-1.00896	0.0945432	0.0588652	0.0175607	0.909279	-0.261038	-1.23288	0.724623	-0.171901	0.00980419
-12.3319	-1.10569	0.103658	0.307777	-0.836287	-2.12007	-1.68499	-0.365444	1.32832	-1.35078	-0.277225	-0.366163	-0.59585	-0.10463	-0.0270165	-0.0691472	0.0477258	0.276539	0.89098	-0.953319	0.441231	0.842096	0.08262	1.16429	0.276677	0.586975	-0.358682	-0.00507852	0.0393546	0.290994	0.887915	0.419651	0.920964	0.722201	0.0329604	-0.252065	0.0429587	0.822325	0.0491902	-0.391544	0.660733	-0.22908	-0.289593	-0.137194	-0.100432	0.289272	-0.65624	0.262317	-0.0136524	0.11224
-13.9776	4.05174	-4.20947	1.39887	-0.848888	1.25198	-0.169205	-0.790089	0.419006	-0.509271	0.516585	-1.01239	0.655439	-1.49374	-0.330564	-0.956696	-1.99696	0.652105	-0.158992	-0.501298	-0.397972	-0.0923173	0.883525	0.732436	0.175504	0.419027	0.414949	-0.876227	0.246197	0.139329	0.0628492	-0.37618	-0.881768	0.0132407	0.968984	-0.520083	-1.9185	-0.942061	0.779716	-0.0488253	0.362334	0.73527	0.882947	0.210299	-1.05682	-0.481857	-0.538824	0.439686	-0.8327	-0.423326
-12.8137	-0.57745	3.18676	-0.435812	0.224243	-0.286801	-0.0656737	-0.648205	-0.270618	-1.23053	-0.485284	-1.50994	-0.914481	0.429296	-0.464829	0.258051	-0.565797	-0.186656	-0.287498	-2.13492	-0.325479	0.472507	-0.416261	-0.0655343	1.44369	-0.194682	-1.15121	-0.40664	-0.210785	0.0275391	1.18217	-0.311222	-0.84236	0.582892	1.61624	0.00285758	0.169382	0.499797	-0.106642	0.297741	0.408635	0.976028	-0.189932	-0.274534	0.806114	-0.13506	-0.612167	-0.530949	1.05501	0.370228
-18.6567	-0.680445	-0.0879633	0.573331	-1.13679	0.812457	0.690154	1.51915	-0.712845	2.5254	0.770986	-0.438495	-0.176018	-1.34036	-0.215119	-0.364677	0.18858	-0.305199	-1.15709	-0.739413	1.17668	0.133565	0.502855	0.59754	-0.00682032	-0.926667	0.0429175	0.372673	-0.383551	-0.520391	-0.922399	-0.562209	-0.279363	-0.786688	0.909578	1.08035	-0.628667	0.560613	1.11465	0.446818	-0.543645	-0.429184	0.642558	0.625354	0.899604	0.28007	-0.45847	-0.727963	-1.0044	0.0324636
0.921636	-5.05423	0.17451	-2.76466	0.242519	-0.900318	-0.677414	-0.630612	-2.11458	-0.571289	1.14884	1.17267	-1.05315	-0.442477	-0.110961	-0.219534	0.480749	1.68351	-0.390112	0.692692	0.962633	-0.266947	0.717258	-0.42572	1.08591	-0.551916	0.802346	0.177704	0.511123	-0.716571	-0.301839	-0.805462	0.625402	-0.0284247	0.562825	0.354722	0.699897	-0.791953	-0.616239	-0.665898	-0.221534	-0.0634035	-0.839242	-0.248856	0.568267	0.0544075	-0.742079	-0.0551506	-0.130261	0.583038
-8.69669	5.14146	2.86794	2.77733	0.949077	-2.64293	-0.87644	-2.24458	-1.2678	0.489074	-0.207083	-0.948307	-0.208197	0.700264	-1.19492	-0.327445	2.02875	-0.299033	1.21219	-0.895901	0.13354	-0.171235	-0.178259	-0.498398	-0.033692	0.447011	-0.226963	0.0542575	0.104662	0.0157979	-1.08638	0.742831	1.4602	0.273416	0.666177	-0.279841	-0.0535407	0.497122	-1.04199	0.0961251	0.210369	-0.325239	0.096719	0.962475	1.09006	0.848496	-0.0215655	-0.695097	0.230352	-0.949673
-19.595	-0.982578	1.99118	-1.72174	2.37625	-3.73205	-0.439216	0.182962	0.873311	-1.58209	-0.925938	-0.0122947	-1.0412	-3.32433	-1.13282	-0.992403	1.29165	-1.21163	0.035741	-0.181417	-2.43153	-0.520541	-0.800424	-0.488896	-0.0719118	-0.858078	-0.202545	-1.06513	-0.598576	-0.951751	0.145197	-0.422724	-0.945458	0.757679	-0.218547	-0.825314	2.1839	-1.12927	1.65177	-0.338922	0.145936	-0.534311	-0.376527	-0.766708	0.14709	-0.326964	-0.145506	0.17547	0.400501	-1.26498
-18.1575	4.78592	2.04301	0.0945854	0.727428	0.0312924	-2.31236	1.43814	-1.76784	2.18569	1.00625	1.18704	-3.53371	0.458995	-0.177657	0.76263	-1.80867	-0.740556	1.8592	-0.373434	-0.304624	-1.26375	0.104668	1.85969	0.168741	1.18641	-0.535648	-0.262911	0.49926	-1.14244	-0.455106	-0.0819716	0.301942	0.90772	-0.567065	1.54738	0.473452	-1.05832	-0.417814	-0.381484	-0.295715	-0.401318	-0.0374664	-0.138566	0.748424	1.36443	0.14104	0.470273	-1.11751	0.83302
1.37763	-6.25012	3.94361	-3.24621	1.38679	0.877312	0.432408	0.0109737	3.40906	1.72551	0.0508563	0.00727394	1.10893	0.0399689	1.64847	-1.75768	-0.0853319	1.18022	0.330878	0.542151	0.383047	1.75214	-0.300436	1.25484	-0.582089	0.277766	0.148402	0.277909	-0.211436	0.548882	-0.13568	-0.435543	-0.518645	-0.0686146	0.003658	-0.752256	-1.47484	-0.738831	0.244483	1.06218	-0.13808	-0.781642	0.452427	0.779569	-0.331489	1.28711	0.321818	0.187427	-0.884905	0.0473576
-12.8436	1.87152	-0.161511	-1.31582	0.967963	0.770733	0.383339	0.591945	-0.485526	-0.371124	0.564917	0.450553	-0.293696	0.207174	0.357242	-0.218409	-0.68383	-0.760572	0.531129	-1.64753	-0.669047	-1.21698	0.118935	-0.183913	-0.399498	0.1003	0.308052	-0.363309	-0.204353	0.618808	-0.0781186	0.900918	0.152686	-0.0535083	-0.411068	-0.371144	0.364893	-0.236595	-0.480725	0.188993	0.0122591	0.544781	0.974637	0.4996	-1.29337	-0.537983	-0.714879	-0.0183401	0.162758	-0.836099
-5.88342	-1.1947	-2.50153	-1.92265	2.78602	-0.579037	1.33856	-0.694197	-0.378269	-0.490556	-0.177149	-0.937408	-0.764716	0.0564501	-0.800833	0.372335	1.01943	-0.451578	0.340251	0.335344	-0.0809023	1.02091	0.170134	0.734744	0.161402	0.963053	-0.715577	-0.557083	-0.56343	-0.535852	-0.573068	-0.907112	-0.486141	-0.391546	0.814288	0.53788	0.0812022	-1.25723	-0.372588	-0.293434	-0.655841	0.83174	0.268934	-0.19363	0.381165	0.455056	-0.268385	-0.703876	0.356345	-0.471534
-10.6197	3.89751	4.04229	-0.516186	1.13846	-2.05069	-0.377434	-1.21545	-2.2244	0.53957	-1.35355	-2.33982	0.572202	0.350992	1.82414	-0.699721	1.55389	-2.34388	0.104338	0.173463	0.0721584	-0.805319	-0.43975	0.85767	-0.243023	1.64244	0.829276	0.0890263	0.328866	0.824072	0.653373	-0.309737	-0.291179	-0.722609	0.495128	-0.70357	-0.747719	0.677149	0.161777	-0.131627	0.221705	0.43808	-0.446978	0.892607	0.00314488	-0.984509	-0.87789	-0.0831501	-0.740149	-0.170103
-17.7127	0.751247	-2.69298	0.789942	-0.37593	-2.076	-1.47939	-0.206466	2.7774	-0.113074	-0.123755	-0.0482279	0.234946	1.89042	-0.183397	0.676199	-0.131215	-0.430278	-2.31078	0.122581	0.19748	0.54575	0.0589137	0.534631	0.264452	-0.766723	-0.656797	-0.219919	-0.0789955	-0.559266	0.476718	0.13593	0.0831396	0.063042	0.846636	-0.306609	-0.385556	0.152397	1.07463	0.0597061	-0.0933507	-0.614998	0.648353	-0.399113	0.527384	0.145423	0.204663	0.0999208	0.094702	-0.653138
-12.8498	3.75277	2.86457	2.39086	0.221633	-1.55193	-1.99305	-1.21164	-0.464827	0.160103	1.05442	-1.17314	-0.459305	-0.381902	0.18304	-0.920986	0.115839	-0.384871	0.0758167	-0.636174	-0.645264	-0.342878	-0.631008	0.140252	0.830901	1.16349	-0.285791	0.533944	1.66562	1.19954	-0.57894	0.761482	-1.16762	0.520095	-0.905198	0.0980269	0.112634	-0.482697	-0.104394	-0.437497	-0.0492042	-0.0596408	-1.33373	1.12993	0.498021	0.606364	-0.335766	0.0804864	0.116854	0.184677
-7.60126	5.26349	0.320866	-1.71382	-0.436562	-1.04205	0.534755	-1.91546	-1.93382	0.503623	-0.508238	1.54234	0.532864	-0.419289	-3.16825	0.567507	0.279435	-0.341504	-0.0118755	0.034528	-2.28474	0.709004	2.02651	0.0213846	0.68487	1.80211	1.57507	1.24397	-1.18602	1.29815	-0.868412	-0.250384	0.578755	-1.64959	-0.631908	-0.444297	0.77394	0.788326	-0.128185	-0.938248	-1.38388	-0.845803	-0.240216	-0.151885	0.161386	0.191124	0.888193	-0.0863925	1.65693	-0.213944
-9.8175	3.36739	3.7891	-1.89324	3.09387	-2.7941	2.38919	1.95866	-0.301159	-0.641828	0.00704046	2.48598	-0.489803	1.79668	1.53409	-0.313604	0.0188735	-0.039191	1.12299	-2.11351	-0.88121	1.75767	-1.24545	-0.788559	0.397416	-1.89948	0.501342	-0.380136	0.567712	0.926168	0.933071	-1.49537	-1.28676	-0.275712	0.978846	1.38793	-0.675373	0.262486	-0.271588	-0.700614	-0.0732181	-0.25252	0.953801	-0.958639	0.640047	-0.52876	0.479707	-0.0497037	-0.546535	-0.301172
-7.05643	4.35905	-1.55723	-2.10599	0.0805052	-0.6781	2.41963	-0.690552	-0.527311	-1.40244	-0.252919	0.176639	-0.455893	-0.695282	-1.27492	0.407616	1.33805	-1.00578	1.15856	0.192109	-0.357135	0.363247	-1.17244	0.496167	0.472067	0.485817	-0.459882	0.856582	-0.247367	0.0707867	1.26408	-0.635306	1.30933	0.126973	1.15497	0.173936	0.163075	0.960699	0.0512388	1.82051	-0.583495	-1.21528	-0.463717	-0.613346	0.270842	-0.267088	-0.88897	1.19266	-0.420296	0.682709
-9.41215	-3.7926	-3.21461	-2.49736	-0.377319	0.62427	0.714801	-0.0828304	-0.517567	0.534268	0.15973	0.899654	-1.40153	0.480245	-1.08366	0.556939	1.0242	0.540486	1.00351	-0.0494672	0.901747	0.234693	-0.694527	0.610156	-0.360864	-0.745246	0.588209	-0.658242	0.908393	-0.739386	0.0536821	-0.813796	-0.200752	-0.396405	-0.459611	0.39316	0.485271	-0.0890053	0.937	-0.0512459	-0.0182457	-0.00583683	0.298111	0.704456	0.297907	-0.0837496	-0.441595	-0.112176	0.0623115	0.790826
-16.5935	-6.01677	0.392467	-2.73018	0.408563	-0.314124	1.18588	-2.86064	0.75623	0.841089	0.302491	-1.36225	0.616257	-1.71613	1.15144	-2.6235	0.523827	0.347632	0.384826	0.304934	-1.25947	-0.0340288	0.649195	0.46979	-0.981707	0.407562	0.616828	-0.907836	0.991053	-0.312271	1.27125	-1.54752	0.920735	0.0163064	-1.0931	1.34254	-0.0160567	-0.797512	-1.42539	0.0612821	-0.429306	0.255657	-0.361388	0.104905	-1.42371	-0.504583	-0.148008	-0.590323	1.17296	-0.484215
-7.3614	7.17294	-0.501657	0.952171	4.34912	3.25229	1.35894	0.8023	0.505298	-1.49839	0.937234	0.502448	-0.833726	1.02034	-0.0396803	-0.689736	-0.271832	0.300014	0.286592	1.30662	-0.422133	-1.97482	-0.596759	-0.306593	-0.613086	0.94608	-1.10908	0.268042	1.10471	-0.275883	0.172752	-1.12298	0.284179	0.676372	-0.0670634	0.288793	-0.397401	-0.887879	0.104079	1.10365	-0.141671	0.526286	0.37504	0.199911	1.43471	0.443385	0.408386	0.564125	-0.191713	0.590134
-15.0558	-0.560545	-1.87074	-0.882549	-0.73334	-2.16717	-1.81381	-0.558963	0.825433	-1.03547	-1.5475	-0.358119	-0.329597	-0.501969	0.855322	-0.280912	0.344583	0.194016	0.438078	0.552602	1.8326	0.416003	0.245058	-1.80462	0.281309	-0.177445	1.03312	-1.10286	1.33908	0.176481	0.503349	0.644776	-0.225809	-0.101176	0.156416	-0.235583	-0.311495	-0.705503	-0.354021	0.711905	0.263478	-1.24441	0.169509	-0.484768	1.51244	-0.144793	0.36249	0.787132	0.220105	-0.653777
-4.19761	0.284093	1.43811	-2.53011	-1.03128	1.63031	-2.36969	1.03707	0.660933	0.189031	1.12633	-1.20298	0.0642767	-0.347585	0.457794	0.591046	0.277346	-0.0625878	1.03826	0.243622	1.52212	0.162982	0.478679	1.168	0.264331	-1.49973	0.537538	0.738445	1.00948	0.471242	-0.871612	-1.33273	0.234251	-0.443865	0.930732	-0.339915	-0.197164	-0.412866	-0.836526	0.122791	-0.489477	-1.14309	-0.572823	-0.34432	0.173676	0.171787	-0.899198	1.05378	0.470348	-1.02839
-8.45004	-2.82627	1.10098	-0.980702	-1.54751	-0.0565288	0.985732	0.348561	-0.155041	-0.320075	-1.22418	1.23096	-0.409902	-0.296251	-0.658748	0.483975	-0.83656	-0.0684233	1.3419	-0.84209	-0.7634	-1.45201	0.448604	1.14515	0.234146	0.369442	0.301573	0.0482286	0.765943	-1.61755	0.217153	-0.525152	0.783892	-0.148954	0.388441	-0.530014	0.20561	-0.320534	0.416494	0.362425	0.386644	-0.907724	1.27008	-0.834569	-0.957721	0.36859	-0.623279	-0.144104	-0.302971	0.153574
-0.319628	-0.609593	0.428274	-0.801527	1.50228	0.272361	-0.354728	-0.513637	-1.36002	1.35098	0.265861	1.1933	0.897047	-0.142249	-0.408061	0.743345	-0.367009	1.08636	-2.66599	0.653832	0.126353	-0.913857	-0.169651	1.66701	-1.09914	1.4165	-0.170141	0.219877	0.28337	-0.51584	1.34107	0.247692	-0.330902	0.923691	0.129982	-0.191148	0.678937	-0.268923	1.15387	-1.17443	0.479705	0.286457	0.172047	-1.24033	-0.306799	1.08235	-0.488033	0.263337	-0.20704	-0.204647
-13.6903	-2.21736	0.259556	-2.44915	1.0088	0.234751	-0.442985	-1.62968	-0.242678	-0.482567	0.134155	-1.32482	-0.864788	-1.43567	0.627296	1.60639	1.3076	-0.427107	1.75409	-0.926198	-0.659026	0.352205	0.148537	-0.63203	1.36299	0.775448	-0.39857	0.326635	0.506906	1.24125	0.260259	-0.311314	0.168175	-0.188054	-0.637446	0.823406	0.0765562	-0.0795778	1.1227	0.061206	0.78781	-1.48472	0.514333	-0.0661285	0.108041	0.220195	1.15029	0.433036	0.101312	-0.366147
-9.46748	2.61608	-1.00068	-0.987856	-0.643541	-1.33867	1.11799	0.631551	1.00955	-0.0706265	0.44772	0.238401	0.0609256	0.832686	-0.366201	-0.226524	1.98745	0.50546	-1.59986	-0.315998	-1.28537	-0.0840886	-0.155071	-0.248994	0.388096	-1.43151	0.241135	-0.160631	0.222467	0.778384	-0.372263	0.807529	0.997206	-0.278355	1.16153	1.0151	1.08619	1.31385	0.0922313	1.51314	-0.281544	0.193032	-0.548459	0.450515	0.180146	-0.710166	-0.570097	0.061867	0.247206	0.492884
-9.46695	1.86987	0.184436	-0.242353	-0.115794	3.80272	-0.721853	-1.91587	-1.01261	1.14389	-0.557891	-2.16122	-0.10281	0.120682	0.904544	1.07272	-0.0814274	-0.46007	0.0533319	0.645558	1.4016	-1.52986	0.585729	0.148962	1.01815	0.44693	0.226852	-0.661666	-1.49132	-0.172443	-0.309847	-0.470079	0.597087	-0.817499	-0.780913	-0.417026	0.180631	0.662988	0.276622	-0.73821	0.180049	-0.204577	-0.887517	0.645852	-0.315174	-0.0392871	-0.361834	-0.725741	0.628517	-0.299281
-4.91748	-5.90231	1.51699	-0.321885	0.0471672	1.11101	0.477757	-1.69654	-0.13316	-0.0654226	1.10254	0.342372	-1.31183	0.849455	0.0171554	-0.303207	1.6347	0.15191	0.498212	-0.832088	-0.00129105	0.0495526	-0.0910398	-0.0915421	0.80186	-0.080089	0.425014	-0.0877112	-0.447503	0.0796907	-0.50608	-0.590331	0.0507091	0.213716	1.99136	-0.210465	-0.0671545	-0.550911	1.33205	-0.238956	0.124429	0.95539	-0.13892	0.548098	0.0755196	0.109339	0.571953	-0.798963	-0.589431	0.489988
3.50916	1.4225	0.427	-2.52386	-0.0458892	0.453621	-0.0384682	2.10583	1.52099	-0.0490997	0.043996	0.419363	-1.73553	-0.0175081	0.700588	0.987275	-0.00302479	-1.29123	-0.401653	0.0351501	-0.803028	-0.673937	0.819661	-0.27726	-0.106916	0.832513	-1.20347	-0.830804	0.313276	0.35447	-0.24049	0.846683	0.398953	-0.56809	1.37091	0.169743	-0.640096	-0.353392	-1.27789	-0.0770146	0.0697429	0.0887755	1.13106	0.166813	0.091328	-0.0497923	-0.0227033	-0.519646	-0.385589	-0.160665
-6.287	-0.423093	0.77218	-1.01767	-0.329759	1.39312	0.109276	-0.280313	0.637286	0.567038	-2.36149	-0.752501	0.91886	-0.422652	0.419357	0.44696	0.0367905	-0.00256172	-0.359542	0.207197	0.448774	0.27445	-0.35698	-1.13741	1.14303	-0.338103	0.244555	0.709551	0.510946	-0.344548	-0.0812916	0.790132	-0.10104	-0.329985	0.932028	1.1106	0.785703	-0.415371	0.22281	-0.542696	0.279086	0.911438	0.914639	-0.48675	0.175334	-0.314002	-0.817622	-0.298282	0.232936	-0.271012
-14.4195	-0.330429	-1.41706	-0.493874	0.719133	-0.656155	-1.43818	-0.787572	0.364841	0.6274	-0.116465	-1.34929	-0.263802	0.822548	-1.77283	-1.54386	0.0221274	-0.144372	-0.719919	-1.15254	0.148887	-0.559503	0.311926	-0.421786	-1.26918	0.171007	-0.240802	0.477598	0.241183	0.837401	0.359362	-0.299008	-0.0261895	1.51403	-0.394856	0.436523	0.992726	-0.865422	-0.0316414	0.157948	0.648252	1.28316	-0.00892586	-0.158361	-0.869424	0.380866	-0.245792	0.359426	0.509693	1.1758
-10.5246	-2.70802	-1.70224	-1.21737	-0.954661	0.0627062	1.45627	-1.12549	-0.550102	-0.253439	0.143773	-0.807656	-1.69436	-0.629217	0.25097	-0.954884	-0.0612188	-0.623744	2.04517	-0.746107	0.0758017	0.223058	-0.799716	0.609552	0.780228	0.689289	-0.243847	0.757	0.870118	1.21451	0.546268	0.659134	0.210571	-0.462032	0.62161	0.412428	-0.165731	-0.135886	0.631677	-0.717761	0.244448	-0.215027	-0.281974	0.265342	0.462581	0.260421	-0.161117	0.35554	0.343991	0.0460658
-8.92765	-0.408229	2.07728	-0.345676	2.0322	2.56822	-0.167967	0.182856	-1.05632	0.163766	-2.9655	0.447091	-0.0681139	-0.999151	0.385959	0.34396	1.70494	-0.36099	-0.865126	1.21164	0.230908	-1.21916	1.14416	0.0882092	-0.379033	0.819333	0.24107	-1.17088	0.650107	0.423452	1.17009	0.483468	0.452791	-0.0215773	0.353972	0.609004	0.253558	-0.40376	-0.696584	-0.0803473	0.363285	0.34244	-0.0442563	-0.181169	-0.223469	-0.218421	-0.38075	1.12749	1.56093	1.14503
-0.692478	3.80556	-1.75775	-1.27283	2.40276	-0.129327	2.50767	-2.02083	-0.6794	1.23679	-1.15291	-1.61997	0.837244	0.101554	0.590055	0.00220641	-0.496178	-1.11663	0.289997	1.16517	1.25847	0.78338	-0.392666	0.478733	-1.03854	1.26107	-0.27466	0.329037	-0.156866	-0.939818	-0.927034	-0.77609	-1.5107	-0.28554	-0.75447	-0.0551707	-0.306312	-0.0289027	-0.152884	1.44433	-0.0551129	0.913019	0.756479	0.00330183	0.000414063	0.739292	0.0246993	0.00169562	-0.710816	-0.563814
-15.2336	0.178728	-0.304166	-0.937071	2.32455	-1.46699	-2.55197	1.05024	0.0716696	1.32921	1.09162	2.17929	-2.63476	-1.33715	1.42872	-0.295374	-0.642926	-0.374769	0.49572	-1.00653	-0.57796	0.0184521	-0.941375	0.548768	-0.563229	-1.13071	-0.806242	-1.32607	0.447603	0.467082	0.0494375	-0.341298	0.302166	0.372578	0.427096	-1.55792	-0.690061	0.298896	1.10567	0.0592267	1.07275	-0.291541	-0.144474	-0.526887	-0.818093	-0.615569	0.712341	0.0788509	0.62936	-0.241953
-16.3124	5.02335	1.65559	-0.332714	0.18445	-1.0144	0.750744	0.928899	-0.385878	-0.234357	1.17187	-0.159345	-0.192904	-0.0841452	-0.30283	0.251316	-1.4018	1.81137	-1.4944	0.997361	2.09563	0.297706	-0.893112	-0.215774	-0.91649	0.295869	1.20404	-0.213188	0.205937	-0.642729	0.305605	-0.921396	0.217317	-0.171269	1.22824	0.454791	0.0769586	0.170123	-0.54984	0.45207	0.775412	0.595752	0.199479	-0.6839	0.141396	0.0785036	-0.10233	-0.0845873	-0.302754	-1.00291
-10.579	-5.31054	1.09796	-1.6969	0.918873	0.455136	2.02538	-0.895103	-3.59129	0.266219	1.22617	-3.63232	0.0116188	0.390339	-0.198319	-0.974493	0.574847	-0.351647	0.264336	-0.420145	-0.23654	1.93034	0.0590804	0.297668	1.2917	0.0845982	-0.73987	1.03926	-0.477448	-1.44283	-0.511629	0.130068	-0.481239	0.733432	0.212198	-0.249244	0.690066	-0.221428	0.695815	0.813199	1.31161	-0.0192721	-0.174472	0.899156	-0.380158	-0.334666	-0.680072	0.350156	0.0142123	-0.225836
-13.1649	0.654057	1.28971	-1.13981	-1.04387	-1.06578	-2.31243	1.08838	-0.170239	0.302137	0.454805	-0.637644	-0.55829	0.976366	0.0625544	0.774707	-1.54401	0.754445	0.00331194	-0.439453	0.110037	0.081221	1.18702	-0.373149	0.716157	1.13926	0.058113	-0.973725	0.319061	0.769675	-0.334	-1.69817	1.07567	0.585566	-0.554172	0.0541949	0.440593	0.335895	0.769059	0.829265	-0.674688	-0.0794206	0.533794	1.1599	-0.236342	-0.171234	-0.100371	0.43513	0.561474	-0.345886
-8.26187	2.10069	1.02598	-1.67839	2.24173	-1.95544	1.03431	-0.277969	0.469816	0.691119	-2.03545	-0.305656	-0.756649	-0.191592	-0.0833942	1.63398	-1.24866	0.951956	2.073	-0.447434	0.357054	-0.390842	-0.126942	0.699312	-0.0842904	-0.151663	1.14452	-1.70264	-0.913306	-1.65386	1.33932	1.01336	-0.595124	0.876494	1.11809	1.24245	-0.454676	0.285823	-0.806829	1.53681	-0.226695	0.429365	-2.03496	-0.803241	-0.641578	0.576366	0.16237	-0.736357	0.275731	-0.651821
-5.85028	-0.782936	0.922255	-4.80469	-1.07924	-0.621021	-0.0992207	-0.911285	-0.0531474	-0.045368	0.794264	-0.772969	0.0509504	0.0643195	0.745595	0.70618	-0.831189	-0.476476	0.234215	0.364695	0.587424	0.316545	-0.453684	0.449386	-0.0320153	0.0556584	-0.358719	-0.118507	-0.480144	1.15483	-0.267907	0.402934	-0.42099	0.317172	-0.767121	0.526448	0.846701	0.156765	-0.187881	-0.106147	-0.152888	0.274692	0.676841	0.680865	-0.546779	0.475139	-0.0922015	-0.998546	-0.145468	0.54293
-27.1847	-2.59435	0.380106	3.10778	-0.768096	-3.19902	-2.29275	0.041491	-0.801326	1.71301	0.225464	0.0849847	-0.49882	-0.856601	-0.970893	1.61095	-1.5155	0.798798	-0.729139	-1.51842	-1.53899	-1.44973	1.64389	-1.34405	-0.0444368	-0.429028	-1.79895	1.13056	0.647587	-0.781996	0.404077	-1.08658	0.0174034	-0.219032	-0.664111	-0.574689	-0.379135	-0.373733	-0.581545	0.127621	-0.0071264	0.0944527	1.28679	0.240375	0.80376	0.356397	0.157677	0.474976	0.224575	-0.810605
-14.5444	0.469919	-0.121337	0.356318	-1.53466	1.38582	-1.57407	-1.69646	0.0261556	-0.116074	1.57025	-0.95187	-1.07831	-0.751153	-1.07822	-0.434285	0.312271	0.130719	-0.289868	0.278773	0.175719	-0.532441	0.368476	0.775189	0.242668	0.396323	-0.682977	-0.123223	0.304917	-0.235928	-0.0802601	-0.0739214	0.0920695	-0.319253	0.616416	0.535408	0.429361	-0.0972246	-1.2661	-0.359786	-0.118419	-0.236167	0.0562646	-0.852407	-0.725642	-0.348384	-0.0719154	0.71024	-0.105446	0.30172
-9.69155	1.171	-0.540655	1.82328	0.228335	0.245686	2.07912	-0.163312	-0.149421	0.473891	0.281395	-0.0486681	-0.743862	0.174118	0.888315	0.917604	1.9621	1.32145	-1.39811	0.0621329	1.03446	0.0209669	-0.0641645	0.635967	0.564984	-0.461341	0.115867	-0.239253	0.523302	0.325795	0.626668	1.19689	-0.167947	-0.487504	0.222577	-0.273708	0.864162	-1.17994	0.396512	1.41259	-0.304041	1.16961	1.14892	-0.499865	-0.148247	-0.467233	-0.156088	-0.328806	0.00977841	0.128365
-7.04781	-4.84988	-1.26491	0.00601884	-0.805736	-0.295752	0.349873	0.00686464	0.295343	-0.0111229	0.203607	-0.76127	0.071804	0.216918	-0.365988	0.26438	0.418156	-0.133244	0.566402	1.31947	0.211453	0.9581	-0.234605	0.550546	-1.03627	-0.346576	0.798105	0.182068	0.356699	0.0735106	0.212738	-0.00752439	0.735369	-0.438885	0.219976	-0.161337	-0.3762	0.409557	0.0224288	0.0948407	0.460491	0.0862604	-0.555262	-1.33187	-0.302364	0.0858946	0.680216	-0.138088	-1.21306	0.293818
-1.5126	0.141601	1.0852	-1.25648	-0.0167208	0.076629	-0.310936	-0.211653	1.40093	-0.878656	1.28007	-0.498645	-2.11981	-2.68955	-0.304504	0.354957	1.13997	-1.13665	1.10282	1.85463	-1.30074	-1.90204	-1.21481	-1.62885	-1.66919	-0.307127	-0.175155	-0.908919	-0.685297	0.22444	0.659054	-0.0894147	-1.43001	0.201482	-0.0227448	0.486097	-0.528703	0.649971	0.689606	0.188398	0.769277	0.125884	0.86766	0.204757	-1.48091	0.660482	0.325841	0.156443	0.0652169	-0.184282
-1.48565	-1.28342	-2.85128	0.517242	0.656304	-1.49244	0.744375	0.378699	0.374376	0.150347	0.437304	-0.393639	-0.0333201	-1.07325	0.528449	0.895806	0.314647	-0.0318185	-0.489388	-0.58008	0.611851	-0.148171	0.503758	0.205341	0.369933	-0.485192	0.513278	0.227703	-0.344928	0.2516	0.283496	0.071258	-0.221913	-0.434704	0.0132779	0.403151	0.775813	-0.161938	0.01546	-0.700479	0.0966893	0.139175	-0.609135	0.267673	0.499425	-0.406196	1.15876	-0.652225	0.0683147	-0.182823
-11.3596	0.904491	2.56773	-1.88748	0.210824	-0.882431	-0.371123	-1.93083	0.00390319	0.092814	-1.18563	0.132833	0.357602	0.904417	0.227285	-0.737846	0.446001	0.0729717	-0.387774	0.114838	0.692538	-1.98276	1.62873	-0.708628	0.418685	0.474339	0.144144	0.468731	0.3605	0.0771463	0.48927	0.566348	-0.415268	0.0125019	-0.80757	-0.0186888	-1.21338	0.533389	0.251058	-0.60322	0.765815	-0.675276	-0.587063	0.903768	0.0813682	-0.493357	-0.269147	-0.124307	-0.247669	-0.797583
-10.4087	-2.68243	-2.27864	-0.898355	-0.132683	1.66747	-2.13679	0.393219	-0.549275	0.551878	-0.667058	0.229223	-1.28524	-0.568306	-1.5958	0.919071	1.05281	0.0477403	-0.825373	0.468682	-0.0172138	1.47182	0.714815	-0.291022	-0.678874	-0.47048	-0.188141	0.560917	-0.230486	0.392258	-0.524868	0.385706	0.0758481	0.443102	-0.517504	-0.680478	-0.0161219	0.655201	0.46251	-0.0685582	0.685072	0.388874	0.287666	-0.297662	0.00900326	-0.128989	-0.746305	0.267859	-0.244968	-0.697874
-14.7061	0.0363103	2.54247	-0.0631475	1.41993	0.908209	0.345922	1.00992	1.41735	-0.690262	-1.35745	1.24111	2.44213	0.25108	-0.396978	0.0242992	1.04277	1.12676	0.182397	0.571164	-3.0103	0.662414	0.902274	-0.729332	-1.0698	-0.649727	-0.713015	0.138683	0.262151	-0.538869	-0.494605	1.50693	-0.477185	-0.665345	0.130616	0.56852	-0.700948	0.294719	-1.47891	0.6647	1.40641	0.684259	1.00462	0.932637	0.663867	0.361764	0.170007	0.40205	-0.086057	0.123428
-22.8674	3.41283	-2.11733	2.23772	2.35655	3.47517	1.11393	-0.593339	-1.66691	4.06114	2.36623	2.23616	1.53327	1.55068	0.187307	-1.05789	-0.311654	-0.296924	1.38099	-0.135426	0.062714	-1.45915	-0.882482	-0.216836	0.357742	1.32597	-0.67969	0.181079	1.02757	-0.0809147	1.82986	1.01658	1.30987	1.44938	-1.04546	-0.529109	-0.429967	-0.784161	-0.0424041	-0.826087	-1.38151	-1.09073	0.286758	0.411055	0.0240897	0.025181	-0.626187	1.04052	-0.592263	-0.300989
-10.0964	0.993964	2.47177	-1.91472	-2.16209	-1.60094	1.02998	-0.712206	-0.415853	-0.945657	-0.807671	0.300236	-0.942536	-2.35215	-0.302683	0.21772	0.17897	0.821652	0.536206	0.130491	-1.59027	-0.514565	0.545636	0.281189	0.062844	0.609345	1.20477	-0.982458	0.579548	-0.243702	0.32644	-0.446145	0.0959795	0.88483	-0.399065	-0.371331	-0.326893	-0.0667049	0.67714	-0.355253	0.740381	0.303142	-0.102493	-0.730811	0.495348	-0.427246	0.109753	0.556432	-0.166926	-0.2428
-9.28189	0.479748	-1.11664	-1.68012	1.36171	-0.539402	-1.62441	-0.939736	0.866661	0.841208	1.43244	0.486933	-0.0645365	0.213898	0.491376	-0.585776	0.236152	1.26221	-1.08552	1.60815	0.132194	0.125169	-0.152347	-0.928272	0.654219	0.279647	0.33942	-0.524584	-0.407317	-0.283855	-0.76608	-0.261717	1.04015	-0.218351	0.323264	0.339104	0.329527	1.30387	-1.28002	0.331965	0.508468	-0.507526	0.495205	0.75971	1.12269	0.877867	0.187086	0.104731	-0.523442	0.493687
-22.9965	0.0316786	-2.73825	-0.240072	2.91895	2.33497	-3.15662	0.570179	-0.845768	2.11688	1.25156	0.647317	-0.0519921	0.255202	1.39893	1.89436	-0.513776	-0.327513	-0.339826	2.09718	0.235231	0.00882868	-0.795369	-0.565004	-0.626722	0.262983	0.478139	2.30432	-0.370966	-1.55035	0.952562	0.17797	1.1547	-0.199877	0.413668	0.0707641	-0.341824	1.03407	0.43474	1.1599	1.5685	-0.625385	0.331416	-0.00763116	-0.336919	-0.804093	0.557171	0.571597	-0.340196	0.0593765
[truncated: 50 more columns]

## Sheet: kernel_0mm_parcels_200
PCA_1	PCA_2	PCA_3	PCA_4	PCA_5	PCA_6	PCA_7	PCA_8	PCA_9	PCA_10	PCA_11	PCA_12	PCA_13	PCA_14	PCA_15	PCA_16	PCA_17	PCA_18	PCA_19	PCA_20	PCA_21	PCA_22	PCA_23	PCA_24	PCA_25	PCA_26	PCA_27	PCA_28	PCA_29	PCA_30	PCA_31	PCA_32	PCA_33	PCA_34	PCA_35	PCA_36	PCA_37	PCA_38	PCA_39	PCA_40	PCA_41	PCA_42	PCA_43	PCA_44	PCA_45	PCA_46	PCA_47	PCA_48	PCA_49	PCA_50
10.0467	1.61684	2.5471	0.119864	0.190057	-0.368224	-1.23245	-0.342049	1.39087	0.376572	-0.190033	1.14399	-0.644844	1.48382	-0.353377	1.35487	-0.353032	0.0682829	0.806285	1.59851	-0.538899	0.270484	-0.529008	-1.76167	1.00864	0.512023	0.206972	-0.352963	0.382512	-1.61882	-0.325758	0.732818	0.35571	0.595749	0.512713	-0.835535	-1.11248	-0.20055	1.26277	-0.133452	-0.686079	0.293974	0.131759	0.102298	-0.493937	0.234824	-0.610485	-1.42353	-1.44426	-1.42906
4.56963	0.285161	3.89766	-0.629741	-1.01433	0.384778	-1.173	1.03518	1.51289	-1.64668	0.93787	-1.98313	-1.56275	-0.0361757	-1.80249	-2.60231	1.73382	0.549047	-0.488002	1.29536	-0.488877	0.439558	-0.575909	-0.728632	0.515647	-0.179748	-0.277269	0.160758	-0.567134	0.252109	0.613324	0.270882	-0.0662709	-1.11051	-0.519875	-0.0115076	0.330909	-0.211185	0.611574	-0.317031	-0.254996	0.728793	-0.428212	0.236476	0.306123	-0.0675646	-0.697471	0.297985	-0.256363	0.455612
16.1899	1.26195	0.201358	0.655859	-0.824193	-0.508324	2.25975	-0.887112	-0.497187	2.37515	0.657829	-0.774861	0.551434	2.01595	0.70911	-0.678075	1.52001	0.0121256	-0.568545	0.192055	-1.8943	0.55272	1.91656	-0.702905	-0.180484	-1.34316	0.342649	-0.0903762	0.303321	-0.290505	2.23061	0.603284	-0.577301	-1.21203	0.232754	0.237263	-0.694609	-0.447387	0.675624	0.230359	-0.459994	-0.296012	-1.18504	-1.21213	0.0975468	0.884846	-0.570117	0.569353	-1.24339	-0.124512
9.49864	-1.55042	-1.71526	1.66647	1.53245	0.582369	-0.910959	-1.63596	-0.274123	-1.13612	0.452465	-0.497491	-1.0595	-0.62948	0.982003	-0.880208	1.58867	0.658423	0.800481	0.497658	-0.850585	-1.36914	0.571748	-1.68245	-0.884087	-0.138955	-0.938311	0.0463173	0.368523	-0.427839	-0.629472	1.18226	-1.45164	-0.180212	0.415324	-0.375743	-1.38521	0.00156206	-1.09631	0.418616	0.601257	-1.26032	-0.0592747	-0.412072	0.944472	0.638234	0.419916	0.306962	0.326461	0.330394
-1.52829	0.190855	2.00155	1.03913	-1.49014	1.16412	1.25834	-0.405669	-1.00049	0.105709	0.387264	-0.3	0.706097	0.393449	-0.896039	-1.29345	0.160423	0.421886	-0.162365	-1.03706	0.630413	-0.355246	0.837375	0.809736	0.248848	0.831069	1.2586	-0.187942	0.0720715	-0.710423	-0.457491	-0.941012	0.524202	-0.702928	-1.30826	-0.366257	0.426224	0.0770158	0.207969	0.0272872	-0.103466	-0.678788	-0.805531	-0.228046	-0.0515074	-0.404861	-0.115744	-0.572593	-0.207981	-0.615914
10.0553	3.25967	2.05555	-1.132	0.865998	-0.813675	0.947194	0.00355565	1.37809	0.360207	1.34721	-0.325791	-2.11121	1.01306	-0.374994	-0.974311	0.898633	-1.24241	-0.422595	-1.30673	-0.508609	-0.233927	2.15898	-0.4065	0.0864077	0.689704	0.921542	0.644152	-0.450414	0.0284171	0.477348	0.120865	-0.75905	-0.556096	-0.361145	1.5333	-1.04163	0.486637	-0.986807	-0.625731	-0.981481	-1.12833	-0.135182	0.882271	-0.326894	0.489434	0.851088	-1.03033	0.279897	-1.07259
9.47038	0.400845	0.76596	0.639067	-1.61477	-1.12684	0.0762445	-1.33599	0.582468	-0.0514739	-0.479801	0.0772289	-1.12464	1.00658	-1.04584	1.20098	1.43386	-0.380348	-0.247562	0.809716	-0.132472	-0.84125	-1.66764	0.353599	-0.243386	0.520095	0.312051	-0.686672	0.0468603	-0.293156	-0.234377	-0.222993	-1.00931	0.760381	-0.347961	0.116391	0.524002	0.670938	0.680842	-2.78919	-0.951789	-1.10376	-1.6798	-0.672451	0.727505	-0.91903	-0.165875	1.33284	-0.724502	-0.313829
14.5016	0.479066	1.58546	-0.284609	2.77443	-0.846308	0.205566	0.0990897	-1.07313	0.463058	0.118328	0.255817	1.38202	-0.262487	-1.56111	-0.223925	1.34679	0.763133	-0.639634	-1.15646	1.51604	-0.993831	-0.478335	0.473819	-0.00671907	0.47409	0.318124	-0.993407	0.210716	-0.187064	0.770874	-1.31087	-0.683998	1.15453	0.782025	-0.614054	-1.17199	-0.322383	-0.878071	1.63674	1.06447	-0.1554	-0.77248	0.801877	1.54855	0.487107	1.15467	-1.27423	-0.393146	1.21301
0.0585076	-0.640342	2.55525	-1.74865	-0.606161	-0.307579	0.469309	-0.50856	-0.829126	-0.863388	0.921376	1.37969	1.43705	-1.1201	-0.22137	0.457768	0.281956	0.0879904	-0.175572	1.58384	-0.565446	0.701602	1.39256	-0.618987	0.97798	0.313891	-0.457328	0.652542	0.934755	-1.31412	0.635033	0.674054	-0.926681	-0.377552	-0.426462	-0.700377	-0.252638	0.064471	-0.438876	0.154733	-1.09091	-1.00485	1.2337	-0.540997	-0.553694	1.02862	-0.508894	0.754117	-0.359547	0.619058
16.6786	0.356433	-0.403599	-2.55408	-1.18144	-1.79086	-0.838311	0.274318	0.596892	0.196138	-0.780135	-1.31502	-0.938816	0.362946	1.90933	-1.94034	-0.937017	-0.590565	0.0538329	1.45342	0.89243	0.522412	0.483758	-1.22748	-0.203052	-0.333507	0.248422	0.613648	-0.806164	0.233612	-1.18464	-1.23012	-1.07791	0.781587	-0.855762	-1.18733	0.6387	0.793017	-0.563407	0.00158775	1.12262	-1.07933	0.78503	-1.64005	-0.675503	-1.29997	1.57278	-0.307347	-0.303482	0.530799
5.14202	-2.13442	1.28008	-0.397915	0.751655	-0.801565	0.0683687	1.4664	-0.984683	-1.75021	-1.20904	-0.840287	0.10684	1.88887	0.609624	0.464438	1.17831	-0.867256	-0.0840027	0.854852	-0.814458	0.945234	-0.929628	-0.432431	-0.171548	-0.723706	0.116567	0.317797	-1.57092	-0.677345	-0.00179833	-0.267183	-0.519137	-0.0966603	-0.0248608	-0.367941	0.661634	0.0921274	0.713719	-0.711641	-0.0843893	-0.666817	-0.470469	1.04051	-1.07892	1.5001	-0.358649	1.41997	-0.930603	0.366745
13.8934	1.31387	1.43922	0.386314	2.28141	0.792698	-0.478498	1.42641	-0.626643	-1.60505	0.49295	-1.10584	1.17307	0.806518	-0.619319	0.951163	-0.449129	-0.307583	-1.54819	-1.13754	0.958581	0.352877	-0.788767	-0.133102	0.838701	0.433311	-1.56223	-0.348657	-1.05533	-0.543679	1.60938	2.36517	-1.39218	-0.528781	0.664192	-0.200855	1.4401	1.36521	0.954958	-0.274585	0.506225	-0.555241	0.74431	0.348977	-0.233078	-0.136013	0.282177	-1.00455	0.431801	-0.809482
24.1516	2.196	0.417721	-2.01938	-1.11464	-0.283826	-1.17637	-0.927911	1.08861	1.31712	-1.61681	-1.76327	0.54329	-1.54946	0.398245	0.0329525	-0.142921	-1.52503	2.37084	0.139763	0.0310972	-1.68216	0.22464	0.193531	0.0997904	0.432957	-0.852996	0.914355	0.605375	-1.64697	-0.491	0.443396	-0.659096	-1.18927	-0.708579	0.782213	1.49695	-1.41489	-1.20621	-0.958091	0.578885	1.10082	-0.153318	0.601783	1.5689	-0.766834	0.513917	0.792477	1.10302	-0.719143
6.19666	1.49079	-0.627298	1.24716	1.58905	-1.50045	-1.91657	0.335622	0.471441	0.873514	0.50717	-0.225822	1.59918	0.454266	-0.353371	0.0978136	0.455725	0.824455	0.757762	-1.52082	-0.18086	-0.274663	-0.268075	-0.796071	0.166322	0.134372	0.171254	0.458869	-0.621947	0.821295	-1.55739	-0.454133	1.13526	0.550182	0.524811	-0.589424	0.173642	-0.0611529	0.325735	0.250027	0.907031	-0.731168	-0.226694	-0.624313	-0.764642	-0.42294	-0.91161	0.70393	0.324105	0.236406
8.48563	0.810068	0.0238471	0.668456	-0.979951	-1.19117	-0.463307	-0.581612	-0.614479	0.298897	-1.42898	-0.440261	-0.527115	1.06308	-0.73358	-0.165497	-0.181576	-1.76108	-1.84895	-0.18508	-0.457223	-0.148693	-0.895645	-0.0210077	0.560707	0.174788	0.696356	0.353695	-0.335258	-1.22841	-0.89134	1.02076	0.101243	0.603623	-0.338824	1.05731	-0.0817832	-1.55543	-0.241823	0.0155494	1.5522	-0.708446	-1.06261	0.1644	1.81059	0.290515	-1.21429	-0.601126	-0.0179806	-1.28282
10.9111	-2.12655	-1.98138	2.44367	1.1878	-0.697626	1.88148	-3.67686	1.09064	0.854042	2.87838	-0.445507	1.05522	0.92622	-0.529098	-0.418615	0.849589	0.447348	-0.120104	-1.77286	0.246227	-0.402543	0.0272179	0.20058	1.17268	0.697477	0.819733	-0.0374788	-1.23133	1.41037	-0.112851	-0.549401	0.35374	-0.335979	1.05158	-1.02565	-0.465717	1.25266	-0.349514	0.109711	-1.57036	-0.0353014	0.793683	0.557347	-0.0284859	0.290413	0.975937	-0.0417149	-0.0278887	0.996737
10.7994	2.77227	-2.92912	-1.68636	0.846383	-3.83621	-0.948783	0.0313612	-1.21499	-0.522186	0.905276	-2.08238	0.0884834	1.54324	1.9402	-0.108161	-0.496353	0.215308	-0.842507	-0.524488	-1.83525	-0.312974	1.23022	0.200627	-0.279193	0.540115	-3.51639	0.715305	0.0379497	-1.69748	-0.207999	1.10647	0.549316	-0.0328037	1.28914	1.72543	-0.0944595	1.18782	0.509193	0.541193	0.136941	-1.50863	-0.11681	0.284735	0.178157	-0.0808736	-0.2111	-0.708163	0.692067	0.157924
13.6015	0.134379	3.00873	-2.09684	-2.03174	-0.879192	0.8193	-1.15577	1.93255	-0.939031	-0.35209	-1.36732	0.54312	-1.03356	0.709396	-1.88888	1.31802	1.43544	-0.162288	2.77673	-0.203525	0.872248	-0.0743398	0.00963524	0.619004	-0.0237851	-0.0114945	0.0836785	-1.81348	-0.0360304	1.10545	-1.43943	-0.363916	0.689619	-1.70021	0.258648	0.742978	-0.636887	-0.934228	0.357876	0.0576018	-1.39906	-1.07605	-0.484973	1.71546	0.63407	0.730209	0.935397	0.66737	1.04517
8.45062	0.0561733	4.48293	-0.545126	2.28207	-2.9189	-0.506675	1.91653	-1.0931	1.32047	0.977378	1.51224	-0.138752	-0.671203	1.52104	0.586455	-0.173452	0.447677	-1.20764	0.819611	-0.015423	-0.718574	-1.65269	-0.17888	-1.33675	0.518817	-0.324441	-1.10689	0.320076	3.1663	-0.882657	-1.38504	0.0979369	0.0158183	1.09792	0.912205	0.78615	0.697792	-0.0748498	-1.68797	-0.309838	0.709795	0.300096	-0.028313	0.604505	-0.166825	-0.551658	-0.519215	1.46919	-0.552798
9.92381	1.11891	-2.22898	-1.27659	-0.34396	0.86787	0.876886	-1.1743	0.0507935	-0.229676	-1.56479	-1.47698	0.811056	1.05927	1.73242	-0.568914	-1.38638	-0.964472	-0.644444	-0.00614122	-2.13339	2.72576	0.730155	-2.18772	-0.807394	-0.442808	-0.519415	-0.0226659	0.249743	0.579473	-0.322135	-0.585983	-0.268226	-1.69138	-0.22979	0.867744	-1.40776	0.534856	-0.200827	-1.15406	0.602996	0.593138	-1.56412	0.0653601	-1.23025	1.93041	-0.842542	0.537215	-0.0978925	-0.443325
3.11715	-2.28278	0.406666	1.10979	-0.580024	-1.5183	0.258902	-1.59307	0.343412	-0.476767	-0.588836	0.746824	-0.149563	-0.0403263	-0.744721	-0.200993	-0.951157	-0.618335	-0.179115	-0.390525	0.617979	-0.0667857	1.01945	1.06271	-0.969616	-0.522308	2.62588	-0.117043	0.236386	0.402774	-0.748105	-0.716083	-0.678598	1.47793	-1.69977	0.0992334	-0.160784	-1.06874	0.415276	-0.348821	-0.414713	-0.0866517	0.472767	-0.197283	0.631526	-0.0771429	0.952595	0.639761	0.872988	-0.830676
19.4045	1.07662	-2.05895	1.00715	-0.546285	1.82128	-1.85527	-0.553514	0.567742	-2.57656	-0.991423	-2.81909	2.4067	0.928674	1.32699	0.0696598	-0.688764	-1.12754	-1.83527	0.830636	1.11834	-1.04402	0.351718	-1.30182	1.71722	1.02374	-0.832644	1.61791	0.942891	2.28621	-1.01979	1.07997	-2.35391	0.823609	1.06487	-0.738247	0.506088	1.61451	0.0991313	0.0144602	1.19519	-1.6011	0.293209	0.0688457	-0.274949	0.0387582	-1.06644	-0.0669952	-0.851553	-0.361138
16.7838	6.09224	2.61871	0.467005	1.28835	-0.945052	1.72327	-0.684573	2.38098	-0.678116	-1.68978	0.527249	1.0565	0.296378	1.14747	-0.298193	0.423387	0.668826	1.14575	-0.741082	-0.916017	-0.182755	-0.266102	-1.744	0.355933	-0.692141	1.5531	-0.110616	0.574236	-1.59361	-1.31114	-0.190988	-0.773562	0.479189	0.157341	1.17267	0.560059	0.902781	0.587937	0.118144	-0.0792679	-1.01851	-0.190894	-0.456933	0.6369	0.0604096	0.128103	1.20553	-0.630979	0.136504
14.0214	-1.65168	-0.0311622	0.196175	1.37217	0.616922	-0.268537	0.00700711	-0.404499	1.39183	-1.43794	0.299814	-1.22542	0.185616	0.256418	-0.537864	0.770501	1.12505	-1.37094	0.453085	0.333505	0.367096	0.930718	0.797861	0.785898	0.247079	-0.234006	1.19349	-0.455752	-0.453994	1.65642	-1.25136	-0.278119	-0.206729	0.774843	-0.473459	-0.864211	-0.1794	-0.7665	1.11339	-1.01992	-0.109405	0.0633831	-0.279773	-0.232058	1.45726	-1.51104	-0.434632	0.273376	-0.685417
8.84992	5.67954	-0.514494	-0.874683	-0.139809	1.49281	0.308769	-3.34077	-1.62564	0.186267	-3.31423	2.68621	-0.423385	0.259766	0.290578	0.157881	1.71397	1.13118	-0.443692	0.866202	-0.198455	2.56509	0.205442	0.912703	2.05196	0.406543	0.39714	-1.0024	0.328994	0.089681	0.855342	0.0747855	2.20327	1.10519	0.579051	-0.218336	0.501089	-0.108196	-1.37251	-0.13963	0.660981	-1.62455	-0.222375	0.405468	-0.270713	1.72152	0.445643	-0.479189	0.191595	0.0602504
12.7694	-3.32374	-1.72046	1.13522	0.288497	-0.347782	-2.23032	0.783057	-0.280504	0.000481487	1.17409	0.623934	0.0758028	0.0171344	0.888601	-2.2853	-1.39645	-1.49518	-0.917678	-0.878644	1.22393	1.05107	-0.0601772	-2.49421	0.101443	0.629768	-0.69228	-1.39366	-1.24771	-0.470426	-0.84689	-0.89617	0.358764	-1.08175	0.465806	0.892178	-0.653384	-1.35015	-0.499043	-0.105103	1.36346	0.578648	-0.434368	0.0088979	0.234997	-1.12496	-0.538843	-0.196027	0.506484	1.55945
8.61028	-0.807912	1.43069	2.23626	1.52724	-2.03506	-1.47081	0.284036	-0.512571	2.77118	-0.239027	0.408327	-1.8553	1.32407	-0.16604	-0.769223	0.585713	0.172947	0.620351	-0.566097	-0.262698	1.00373	-1.48798	-0.971881	0.263008	-0.731244	-0.137123	0.702755	-0.532983	1.99645	-1.17463	-0.302558	-0.0995851	0.359054	-0.291895	-0.114253	0.241902	-0.00263245	1.05546	0.41711	-0.764286	-0.573725	1.06604	0.897075	0.469473	-0.914723	0.53157	0.46002	0.130132	-0.469597
7.6563	0.418845	1.55567	-0.546015	-0.287864	0.444244	-0.771591	-0.145532	-0.0309369	-0.00681698	-0.337372	0.758422	-2.25343	0.233612	0.0603288	-0.941268	-1.98041	-0.307631	-1.54459	-0.109	1.12695	0.583198	1.98811	1.04871	0.911688	-0.457323	0.76515	-0.501968	-0.4921	-1.19421	-0.73001	0.516395	0.551912	-1.09645	0.413621	-1.63327	-0.581987	0.163488	0.428422	0.311869	-0.109363	0.160666	0.382908	-0.120806	-0.177616	-0.788598	-1.19442	-0.762672	0.541936	-0.747968
12.8104	3.50685	-0.809623	-2.62159	-1.21654	1.18445	1.07392	1.06006	-1.34889	1.48478	0.00322278	-1.81615	-0.0214958	0.08838	-2.45713	-0.740799	-0.245785	-1.65108	0.913764	2.25259	-0.234394	1.10297	0.419995	1.02809	-0.870993	-0.153299	-0.31374	0.197643	-0.932664	1.0775	-0.549755	1.23241	-1.0574	-0.273752	-1.05607	1.33149	0.206886	0.392556	0.405155	0.457365	-1.09841	-0.940058	0.240742	-0.0801635	-0.651922	-0.499034	-1.42893	0.0968509	0.15884	0.670621
11.3037	0.769329	1.39008	-1.32263	0.268306	-0.946837	1.16803	1.07403	-0.595395	-2.63306	-0.65741	0.496973	-0.564451	0.123059	0.286934	-0.688055	0.365487	0.503214	-1.11916	1.73803	-0.173487	0.0588317	-1.69537	0.804502	1.04845	-1.46365	0.380227	0.448201	0.12038	0.774857	-0.330378	-0.1489	0.595474	-1.35322	0.614776	0.709678	-0.906947	-0.765474	-0.00933903	0.725655	-0.273068	0.925347	1.7366	-0.979712	-0.838648	0.46761	-0.988308	0.849805	0.598373	-0.136303
14.3141	0.270859	1.00586	-0.293813	0.724635	1.30699	1.12243	-1.56287	-0.188952	-0.0405974	0.115326	0.0679802	-0.243453	-0.48311	0.0902061	-2.33348	0.667928	-0.464507	0.0775751	0.74999	-1.49686	-2.14013	0.917886	1.88311	-0.127699	0.0308242	0.17216	0.970513	1.12498	-2.38681	-0.320724	0.273846	-0.954771	-0.43476	-0.780557	-1.72006	1.22147	-0.680928	-0.478536	-1.24148	-0.408859	0.833368	0.497629	0.682842	-0.30153	0.717983	0.354248	1.99246	0.229619	0.889532
3.50283	0.843591	1.21382	-1.62342	-0.109166	-0.188303	0.0661736	0.334243	-0.711743	-1.73684	-1.10236	-1.0557	-0.512188	2.05673	1.927	-1.19281	-0.369791	0.447599	1.7806	-0.000343608	-0.0695822	-1.28881	0.959533	-0.20821	0.436241	0.190001	0.38419	0.760402	0.781233	-0.206307	-0.854047	1.46798	1.2993	-1.57042	0.534201	-0.108519	-1.00127	-0.797907	1.87956	1.23852	0.621058	-0.61335	0.138014	0.332026	1.30605	0.560597	0.416444	-1.59675	-0.00146803	-1.76005
11.3836	3.9388	1.15324	0.0344085	0.987891	-1.24355	-2.10557	0.623709	3.25075	-3.76211	-0.119039	-1.1386	0.07668	-0.991115	1.3197	-0.584718	1.05529	1.23779	0.306944	0.659564	-0.329617	-0.29251	-0.590991	1.46561	-0.775877	-0.488839	1.42798	-0.123366	0.635537	-1.12182	-0.759103	0.914562	1.59195	-0.414862	0.454114	0.674285	-0.148678	0.60286	1.41377	-0.377829	0.600767	-0.817137	0.0113748	0.100071	-1.63246	0.217062	0.953477	-0.523447	1.42233	0.349518
20.4731	3.03913	4.03371	-4.0674	-0.21586	-0.409549	-0.810297	0.974922	1.02648	-0.142626	-1.24621	0.086262	-1.25426	-1.61562	-1.3139	-0.441808	1.20722	3.4111	0.203541	1.87785	3.15835	1.84424	-0.259084	0.868782	2.21326	1.6517	-1.60234	-0.798455	-0.270851	2.48343	-1.02842	-0.589687	-1.06895	-0.596833	0.617973	0.680316	-0.93954	-2.36465	-1.54676	-0.30581	-1.03454	-0.499389	-0.157419	0.618702	-0.136367	-0.238149	0.131485	0.6364	-2.06249	0.956322
4.91266	-0.616302	-0.444523	2.22852	2.86074	-1.05814	-0.741714	-0.939676	1.55591	0.448844	-0.415746	-1.21445	-0.0731952	0.531003	1.96948	0.894581	-0.146514	1.19268	-0.360499	1.02038	1.65361	0.744979	2.22081	0.916645	1.26049	-0.422504	0.0233807	-2.48599	-0.564989	0.384123	-1.25	-0.0838693	0.760188	0.60686	0.499008	-0.576605	1.02828	-1.05423	0.202194	-0.675128	2.27785	1.73734	1.57003	-0.838865	2.34442	1.08091	-0.423046	0.76344	-0.231845	-0.0311102
-1.70088	1.97381	1.45585	0.571403	-2.28147	-0.542577	-1.41637	-0.642046	-0.588566	-1.54099	-0.764165	-1.46091	-1.58051	-0.55767	1.01892	1.09824	0.247973	0.0251689	0.130499	1.81164	-1.09117	-0.880451	0.816717	-0.970764	-0.345379	-0.89174	-0.421016	2.28472	-1.44369	-1.78464	-1.09604	0.00585058	-2.06617	0.467629	-2.76163	-0.432125	0.743877	0.466453	-0.634938	0.292122	-0.417349	-1.52207	-0.603161	-0.0667835	-0.565929	0.0705686	0.33585	0.303261	0.425956	1.02826
23.5086	1.17514	-0.405583	-1.48407	-1.30735	-2.60987	-2.98589	-1.02976	-1.20637	-0.0457463	-1.41271	-1.48901	0.481053	0.849738	0.414871	-0.193921	-0.321166	-0.506119	-1.36784	2.05634	-0.415693	0.458739	0.193496	-1.25469	-1.19853	0.0519353	-0.959447	-0.680648	0.199115	0.921191	2.3065	0.383868	0.0706507	1.08584	-0.034945	0.38142	-0.103996	0.516818	-0.179375	0.715783	-0.577358	0.842774	1.01401	1.10512	-0.687277	-1.29245	1.29202	0.769663	0.0882412	-1.33846
16.6349	-0.568454	1.98851	-1.9077	0.575298	-0.618297	-3.2651	-0.523782	-0.412563	-0.599135	1.24295	0.104766	1.04953	0.0749842	1.08373	-0.804242	-0.980323	-1.34631	-0.392212	-0.262521	1.14972	-1.1031	-0.539292	3.68588	-1.23687	1.06251	-0.888	-0.131575	-1.13368	1.11703	-1.15755	0.195782	-0.164806	-0.770428	-0.554813	0.379552	-0.0476728	0.99208	0.706571	-0.27186	0.349072	-0.518852	-0.551431	-0.730251	-0.82538	0.345861	1.22447	-0.412942	0.544318	-1.81489
8.78691	-0.953137	-0.476344	1.76493	3.8062	-0.723842	-0.0201615	-1.33856	-0.175744	-1.06436	-0.17948	0.58356	2.5594	-0.617653	-1.4033	-1.86847	-0.677712	-0.158209	-2.36136	-0.420774	0.25929	0.286862	1.10876	-1.30821	-0.36035	-0.820402	1.34637	-0.838825	0.550244	0.880447	-1.31075	0.686869	1.55911	1.02386	-0.963147	-0.52607	0.79713	-1.2639	-0.28428	-0.302709	-1.15979	-0.38572	-0.754191	0.0268982	0.836775	-0.580133	0.643693	2.28964	1.01926	0.740789
21.2354	1.84784	-3.36079	-0.297251	-4.04459	-1.51897	-2.20703	-2.50546	2.14382	0.295886	-0.00936465	1.45622	2.6077	-0.131989	-0.569998	-3.07245	-0.646125	0.512236	-0.657188	-1.52987	-1.51445	1.70182	1.19267	2.00998	1.20031	-0.627291	-0.576258	-0.828714	0.157016	-0.99745	-0.140632	-1.57882	0.132238	-2.50316	-0.943182	0.886443	-0.485444	-1.93053	-0.313159	0.859582	-1.33431	0.66704	-1.35314	-0.894834	-1.2189	-0.225107	0.25457	0.0998599	0.0560884	0.631695
10.5276	3.04947	2.62042	-1.76699	-2.77175	-1.68138	-0.775246	1.62436	-1.74384	0.893131	1.80789	0.673607	-0.877164	-0.229393	-1.75798	-2.17178	1.39708	1.58675	-0.216305	0.161312	0.978707	-0.284105	-0.486033	-0.178898	1.33613	0.429617	-1.14867	-1.44947	-0.486579	-1.50024	0.197167	-1.48887	0.358416	-0.0714489	-0.0649982	0.142297	-0.934983	0.48999	0.94501	0.124913	0.660521	0.89701	-0.990051	-0.982578	-0.0876511	0.917777	1.03882	0.415321	-2.17775	0.126093
7.20686	-1.26412	1.67014	1.38732	0.608033	-1.67966	-2.18502	1.44584	0.856511	-1.76132	-0.635345	0.297757	-0.385771	0.353007	-0.963852	0.440961	0.330771	1.70994	0.627701	0.260128	-0.105646	1.07575	-1.49462	0.697929	-0.207108	-0.320067	0.0419502	-1.76058	-0.834466	0.769596	0.565915	0.774011	0.744932	0.374142	-0.798958	0.396243	-0.49441	-0.538538	-0.443086	-0.0396104	-1.31065	0.257874	-0.103844	0.742187	0.0163598	0.656046	0.703164	0.729253	-0.124319	0.201741
11.8996	4.06553	3.0843	-3.61312	3.3995	-0.536855	-0.820934	0.188037	1.05347	-1.81849	-0.738405	-0.301186	-0.658486	0.393347	-0.15245	1.25728	-1.11896	0.957652	0.000956698	-0.355894	-1.52729	0.96822	1.12047	0.944267	-1.42829	-1.10484	0.140047	0.149052	-1.26937	0.524579	1.9962	1.51906	-1.95087	-0.25159	-0.438414	-0.181491	-0.106376	0.288311	-0.637514	-2.16542	-0.908945	1.32429	-1.023	-0.0219891	2.91476	-0.579825	0.240784	-0.602973	-0.440702	0.268838
6.92812	0.478439	1.05572	-0.196568	1.03435	-0.958317	-1.78752	1.28704	0.957539	1.02804	-0.598469	-0.629018	0.184385	0.00645307	-0.837443	0.641742	2.01081	-0.650956	-0.175179	0.404218	-0.365436	1.63014	-0.656167	0.855195	0.629133	0.934423	-0.535096	1.62315	-0.241687	-0.991901	-1.10165	0.924496	1.46842	0.8046	-0.330874	-0.660754	-0.613378	-1.65777	0.613312	0.278165	1.9473	0.310884	-0.498115	-0.280997	-0.00494415	2.0447	-0.143083	0.228884	-0.85974	0.387162
13.3764	3.8068	2.77223	-1.51198	0.501219	-1.82298	-1.10596	0.621875	1.79713	-0.615942	0.207489	-1.39171	-0.516316	0.130261	0.00938504	0.270796	-0.892795	0.699697	0.0215128	0.363822	-0.649589	0.92216	-0.173276	3.61001	-0.102742	0.174393	2.72035	1.27526	0.82382	0.28811	0.457189	0.438589	0.604121	-0.992426	1.85584	-0.983773	-0.879897	1.02955	-0.0719029	0.240069	0.333635	-0.806473	-0.462281	0.353898	0.279916	-0.505485	0.820053	-0.302234	0.231454	0.167066
15.4147	4.36774	3.23739	-1.55341	-1.45898	-3.23404	0.863929	-1.24551	0.495976	0.87752	0.206965	2.64442	1.02633	-0.0178651	0.415404	2.07097	-2.05581	0.940965	1.77264	1.94685	-2.85629	0.0413333	0.0724778	0.0961518	-1.48687	-2.44585	0.0967783	-0.00346214	1.97963	-1.23119	-0.940935	-0.258191	-1.37261	1.84264	2.36549	-0.908493	0.443803	-0.0806658	2.26064	0.0961434	1.01558	-1.25778	0.415201	-0.106085	-0.123796	0.852339	0.32938	0.667603	0.0284189	-0.0048312
-5.44658	0.293504	3.05598	-0.0602244	-2.65488	0.988779	0.731102	-0.113813	-1.99661	-0.35862	-1.29769	-1.32126	2.28541	-0.510033	-0.320505	-0.967121	1.6776	-1.81786	0.584184	3.01492	0.523563	1.30587	-0.59633	-0.377175	0.373162	-0.161186	0.449435	0.0714806	-2.00232	1.10632	0.316799	-1.23639	-2.09635	-0.298792	0.550621	-0.150652	0.336941	-0.552041	1.6301	-0.265367	0.56912	0.366995	-0.785683	0.593727	-0.745898	0.529923	-1.18636	-0.0310802	0.0672767	0.0312027
10.1914	-1.26373	-0.209353	-0.875098	-1.16854	-4.72156	-1.46905	0.0129171	0.524933	0.637818	-1.42607	0.191967	-0.673371	0.919301	1.69315	2.12431	-1.36668	0.334856	-1.4243	0.828893	-0.821584	0.929694	-1.60321	-0.622275	-0.468103	0.51532	0.339644	-1.5997	-1.10765	0.204752	0.682149	-0.589069	0.478361	0.220615	-0.136169	0.995757	0.193432	-0.0208446	0.822218	1.47106	1.21916	0.115411	0.5269	1.20734	2.57515	-0.034369	-1.36675	-0.866243	-0.125621	1.59464
10.4576	-0.247003	0.847047	-0.560156	-0.846774	2.53162	-0.283751	-1.31896	-1.99213	-1.6732	-0.0291272	2.92286	0.0754915	-0.427074	1.363	-0.108757	-1.08202	-0.148907	-2.22692	-0.746993	0.507364	0.0381618	1.15515	-0.257671	0.361757	0.842578	-0.963772	0.83645	0.666683	0.120755	0.811073	0.477334	-0.91188	-0.1879	-0.118328	-0.623193	1.40522	-0.0210265	1.20262	-0.810348	-0.535752	0.205832	1.38894	-0.753385	0.157029	-0.121631	0.795787	-0.222731	0.993264	-0.550712
13.4976	0.512246	0.12538	-1.43152	-0.961551	1.39693	0.441486	-0.742332	0.250532	1.84251	-0.898476	-0.513402	-1.78946	0.292297	-1.49103	0.358873	-0.00208356	0.688532	0.0868889	0.403332	0.215922	1.30141	0.32724	-3.69565	-0.0222221	0.235753	0.470892	0.877072	-0.567081	0.917954	0.490325	-0.461898	-0.355597	-0.686469	-0.763848	0.214533	-0.122418	-0.0210402	0.0680878	1.7793	-0.490535	1.41217	0.0627576	0.0311099	0.950962	-0.106025	0.194132	-0.207992	0.187312	-0.349934
10.354	0.0995551	0.942419	0.856198	-0.688448	0.801226	-1.54683	-0.950597	-1.34724	0.456974	0.629148	-0.591389	-0.653412	1.54882	-0.243609	-0.969607	0.329444	-1.92323	-0.966934	0.444283	0.534615	-0.607238	-0.111067	-0.954211	-0.268947	0.12254	0.565295	0.426712	-1.13068	1.3838	-1.4736	-1.2865	-0.309089	-0.441929	-0.801198	0.770392	0.792426	0.514083	-0.27008	-0.623562	-1.49614	-1.61168	0.0320273	-2.02636	1.30738	0.838447	-0.144647	0.622933	-0.14786	0.780519
24.2444	1.05052	1.52345	-1.86242	2.11968	0.301717	2.4876	2.82004	-3.54202	-0.709001	0.73638	-0.663512	0.148976	-1.12516	1.6614	-1.40682	-1.31889	0.160796	-1.10745	0.0225805	-1.62696	-0.130845	1.85338	0.357758	-0.970782	0.216787	0.304203	0.540199	-0.051554	-0.184037	1.58316	-0.882093	-0.434527	-0.365615	-0.10368	-1.48279	1.52391	0.741846	1.26489	0.896052	-0.0383527	0.714334	-0.179254	-0.113248	-0.810857	-0.0349371	0.255513	-0.407459	-1.52472	-0.391506
4.47559	-2.3028	2.41343	-1.28841	1.14151	1.71486	-1.42698	-0.3301	-0.568713	-0.202871	-1.52438	-0.25775	1.51911	1.62385	-1.63046	-1.69036	-0.167181	0.844154	-0.182958	-0.92908	-0.468173	-1.08674	1.21386	0.28664	0.835082	0.737651	-0.258302	-0.120014	1.21712	0.211062	0.280705	1.46974	-1.11004	1.06963	-0.0472912	0.141243	0.271456	0.836648	0.780103	-0.203204	-1.59546	0.666746	0.619345	-0.53178	0.182243	1.46463	-0.228919	0.148857	-0.181897	1.00063
14.6083	2.06076	1.60093	-1.39415	-1.27765	-2.06169	-2.66345	-3.0682	1.14642	-0.198524	-0.550146	-0.425923	0.332077	2.42238	-1.16934	2.2988	-0.501728	0.69793	-0.78872	-1.6993	0.624268	0.0368116	1.05671	0.0844217	-0.494168	-0.627736	0.5111	2.32488	-1.7276	0.915829	0.373914	0.135888	-1.44327	1.80663	0.484703	-0.304939	-0.615459	0.707401	-0.62815	1.41836	0.0982646	-0.614282	-0.926769	1.01029	0.177021	0.232574	1.07859	1.47489	0.721143	0.144394
15.5039	0.809134	-1.66633	-0.225524	-0.351796	0.837797	-0.550208	-0.985398	-0.710059	0.51727	2.60046	-2.14279	-1.50997	0.995107	-1.07011	-0.569861	-0.589259	1.10947	2.56611	-0.265605	-0.900064	0.922173	-1.228	0.395982	-1.10715	0.764361	1.11768	0.760072	-1.41055	0.0256145	1.26289	-1.28853	-1.08103	-0.273199	2.87306	-1.00169	0.732394	-0.6116	-1.25586	-1.23492	0.126268	0.534071	-0.484626	-1.23016	0.777009	0.770758	0.046632	-1.14011	0.514146	0.52845
9.0798	1.22973	1.18598	0.318793	-0.613493	-0.689429	-0.702075	0.52081	0.543242	0.0998216	-2.44548	-0.436258	-1.57584	0.959933	0.519584	0.523948	-0.638396	2.15676	0.00577688	-1.41558	0.72733	0.175736	-0.637116	-0.634373	-1.28262	0.0202674	-0.988455	0.611423	0.915391	-0.333414	-1.95936	-0.426267	-1.92934	-0.258963	-0.37689	-1.42815	1.6153	1.73792	0.0242709	-1.86977	0.605294	0.627211	-0.185657	-0.808867	1.74063	-0.221971	0.220176	1.07598	-0.914741	-0.38225
18.3873	2.21711	-0.51217	-0.413012	-1.49925	-1.34981	-0.256731	-1.16036	0.16239	-1.00585	1.12373	0.32775	1.69971	-0.880711	-1.28275	1.01525	2.27746	0.809234	-0.365579	-0.650737	0.079506	0.564548	1.28873	-0.230644	0.461899	-0.433256	0.0980483	-0.354103	-0.54855	0.126167	0.508713	0.518775	-0.149377	-0.401327	-0.343974	-0.333131	-1.0532	1.29363	-1.0629	-0.426268	0.589963	-0.151715	-0.808126	0.661578	0.227911	-1.14024	1.08479	-0.925865	0.623141	-0.582602
2.93949	0.186777	1.31333	-0.140729	1.92002	-1.15102	-0.0593604	-1.1058	0.355957	-0.658356	-0.861207	-0.49534	0.188824	2.31566	0.0157121	0.736042	0.336451	0.56656	-0.211617	0.238063	0.301207	-0.656724	0.307476	-0.748528	0.467582	0.597987	1.03727	0.526888	-0.123867	-0.78669	0.161742	-0.783088	0.273802	-1.81287	-0.479152	1.09367	-0.824543	-0.156038	1.34694	0.994416	-1.35392	0.909949	1.14658	-0.27653	0.0757041	-0.45489	0.517582	1.56971	-0.489566	-0.742875
3.198	0.665873	2.93135	-0.0890643	-2.53093	0.596953	-0.45284	-1.87135	0.615935	2.2494	0.396519	-1.51833	0.399078	0.817844	-3.28758	1.24863	0.640451	0.108671	-0.611159	-0.777249	-0.447888	-0.608566	-1.84787	-0.0734931	-0.561421	0.68036	-1.48791	0.264909	0.484829	-1.37482	-0.776842	0.17519	0.155743	0.0630204	-0.21925	-2.05073	-0.78966	0.150334	-0.986217	-0.0980136	-0.0438263	-0.791374	-0.6227	-0.0233678	-0.604408	-1.3402	0.454153	-0.363436	1.11314	-1.2526
4.09871	-2.19977	2.20612	0.331649	1.38581	-2.06731	-0.36335	-2.07511	-0.328213	1.62284	0.725224	0.92024	-0.0139181	2.08673	0.739643	-0.384059	0.0740345	-0.633817	-1.99148	0.15373	0.804812	0.0502643	-0.611416	-0.468629	0.836329	-0.210434	0.34529	0.820088	-1.83372	0.118201	-0.483572	0.684706	0.269442	-0.762999	0.206314	-1.2329	-1.00936	-0.0110288	-0.801417	0.138882	-0.0375625	0.725369	0.083637	1.42314	-0.472764	0.612382	-0.0712329	0.179084	0.35126	0.322871
5.71282	0.0814882	0.277176	0.227744	-0.276677	-0.874558	-0.857396	-0.336665	-0.639749	0.405746	-0.820373	-1.24235	0.654663	-0.246126	1.2303	0.0812045	-1.16492	1.30626	-0.41286	0.686452	-0.690824	0.815199	1.91972	0.202848	0.716688	0.979091	-0.144545	-0.157459	-0.401582	-0.124064	-0.524882	-0.223653	-1.12219	0.542511	-0.720784	0.738151	-0.0667892	-0.247396	-0.0643163	-1.28341	-0.12798	-0.0488489	1.18276	-0.720255	0.055333	-0.966808	-0.702404	-0.091158	0.376212	0.654345
-1.4739	-4.70881	0.340985	1.49868	0.5388	-1.09676	-0.0561949	-0.904542	-1.6552	0.483965	-0.475341	-0.50756	-0.822695	-0.713902	-0.24459	0.607352	-0.345639	1.56851	-0.562429	-1.16561	-1.19456	0.0419626	0.319597	0.575845	0.470799	0.63161	0.939393	1.31402	-0.582983	0.516828	0.247845	0.325296	-0.174778	0.253299	-0.0385928	-0.0661347	-0.178404	0.222895	1.24663	-0.413065	0.227816	-0.848913	-0.930133	1.3835	0.0532054	-0.134045	-0.636402	1.17805	-0.790764	-0.324826
10.7908	-2.04655	-1.57299	0.901045	0.532965	-0.658108	4.55599	-1.81319	0.169604	-1.25944	0.373435	1.30546	-0.481089	1.57691	1.03129	-1.06143	1.84246	1.1139	-1.53498	0.473288	-0.30286	-1.72535	0.162745	0.184428	-0.526532	-0.146124	-0.851229	0.513152	-0.0954085	0.483148	0.750885	1.23947	-1.18707	-2.01482	0.122695	0.324637	-0.393261	0.934287	-1.3579	-0.876479	0.671521	-0.177275	0.0170509	1.06148	0.267685	-0.24619	-1.25731	-1.79427	-0.0748613	1.05252
2.12571	-4.41612	1.06715	1.43678	2.84856	1.44376	-0.676835	-1.45487	-0.333099	-0.691404	-1.40558	-0.124704	-0.427506	0.49257	0.758079	-0.40291	0.898624	0.492133	-1.05973	1.53287	-0.246624	1.01952	-0.684537	0.742945	1.32278	0.415038	-0.546153	-2.02239	0.0768356	0.582323	-0.101884	0.260026	-0.183545	-0.741406	0.650287	1.55391	0.913393	-0.662747	0.50566	-0.318156	1.13363	-0.855411	-0.291922	-0.72369	-0.607563	-0.645185	-0.495262	0.30382	-0.440951	0.321694
3.89357	-0.386415	2.89655	0.69948	2.72291	-1.23264	0.856273	0.955388	-0.603533	-1.02757	0.395383	-0.968454	-1.39887	-0.524818	-1.21372	-1.57667	-1.01906	1.48176	0.858892	0.134618	-0.802103	-0.065609	-0.0646678	-0.251303	-1.34024	1.8399	3.03886	-0.868604	-2.06779	-0.188013	1.73039	-0.208821	0.492866	0.782074	-1.04257	-0.4511	0.0330034	-1.39636	0.244484	0.043626	0.466487	-1.65086	0.238022	-1.43915	-0.425361	-1.17375	-0.176293	0.098471	0.472466	0.803307
9.34223	0.674418	-0.02951	2.90251	0.0808453	-1.93365	-0.0157065	-0.343777	1.25732	-0.643115	0.183642	0.780003	-1.16738	-0.0670618	1.03884	-1.90345	1.30823	0.478582	-0.516582	-0.612048	1.66778	-0.147514	-0.983282	1.21931	0.592906	0.447578	0.353674	-0.354766	-0.690807	-0.277452	0.611965	0.334923	0.607415	-0.224342	0.352188	-0.346363	-0.237478	-0.213356	0.770056	-0.266319	-0.239145	1.29571	0.0454067	-0.656766	0.0513091	0.613903	0.563309	0.911352	-0.113137	0.149751
6.27122	1.68065	0.651824	1.69198	1.75613	-0.694025	1.66153	-1.1103	0.530596	-1.75578	0.787105	0.996099	-1.32341	0.249233	1.45184	0.842037	0.529418	0.857976	0.968758	-0.409606	-0.351307	-0.459684	0.416371	0.133776	-0.855373	0.217027	-0.277392	-0.807617	-0.867545	-0.153964	0.719309	0.929681	0.793622	-0.419172	0.0627715	-0.121492	0.478841	0.232979	0.231223	-0.347268	-0.127502	0.319962	0.510805	-2.68013	-0.14002	-0.453765	0.792621	0.176818	-0.404417	-0.173305
8.02754	-0.216249	0.713041	2.94484	2.97638	0.483639	0.319042	-0.0817479	0.163294	3.47158	-1.76043	0.685413	-0.676342	0.811968	0.39713	0.519753	-0.457121	-1.21143	-0.37004	0.255237	-0.588187	-0.240389	-0.895576	-2.08933	-0.29206	0.0481669	-0.929446	-0.964247	-0.171586	-0.971218	-0.460336	-0.36038	0.951337	-0.0805842	0.740321	-0.00407278	0.807812	-0.876524	-1.55821	0.259013	0.37581	1.29299	-0.579957	0.587805	-0.143152	0.0204269	0.554185	0.682668	-0.210796	-0.22571
4.87611	-1.03352	0.0788579	1.32701	0.506891	-3.73132	-0.00741179	-0.533783	-0.838086	-1.29841	-0.302966	0.211201	0.389662	-1.44661	-0.817694	0.488284	-0.0298882	-1.57224	0.20937	-0.94761	-0.195616	1.16937	-0.923344	-1.17897	0.291936	0.596324	0.701427	0.252955	1.30516	-0.017983	0.432179	2.02752	-0.449187	0.154698	0.219897	-0.845848	0.186154	1.46355	1.90139	0.456109	0.872123	-0.547455	0.703544	-0.630557	-0.323707	0.816742	-0.619368	-0.405121	0.0421693	1.5231
8.44332	-0.955321	0.357257	-0.705439	1.29604	-2.03629	-1.49176	1.03503	-2.7414	1.71423	-0.15759	-1.17327	-0.361098	0.871168	-0.349007	-0.795842	-0.761982	-0.328249	-1.36999	0.553045	-1.68687	-0.693768	0.169899	-0.14909	0.849763	0.168196	-1.47617	0.24189	-0.761348	0.605196	0.735245	0.0584458	0.273086	0.548269	-0.0985819	0.397012	-0.548909	-0.385395	0.0780229	-0.395564	-0.312724	1.34897	-0.666464	-0.862079	1.80951	1.2298	0.36066	-0.192275	-0.264055	1.44086
2.90772	1.1133	-1.54628	-0.231902	-1.45706	-0.180846	-1.9943	0.0523541	-0.936878	-0.636505	-2.17187	-0.601671	0.33613	-0.115004	0.210372	1.08335	1.18237	-0.863494	0.829731	-0.814612	0.0194313	2.91161	1.09458	-1.05506	0.562008	-1.00644	0.575136	-0.274737	-1.00892	0.558939	-1.35315	0.468197	1.36977	0.299805	0.835238	0.539076	-0.0807138	0.686016	0.332288	1.25977	0.154773	0.325361	0.145504	0.538934	0.0862076	1.44567	0.763637	0.26937	-0.478195	-1.07917
7.65049	2.52003	1.64165	-3.90542	-1.10518	-0.0622845	-0.879268	-0.328002	-1.38279	-0.472701	-1.15352	1.0836	0.0260457	1.56149	0.0477969	-1.54018	-1.2292	0.0602824	-0.644856	0.368717	0.113737	-1.3488	0.251541	-0.378895	1.65213	-0.507953	0.178812	0.761773	-2.0629	-0.773438	-1.23136	1.53896	0.232393	-0.0298764	1.38738	-0.155197	0.417414	1.1531	0.0238398	1.66795	-1.12044	0.718176	-0.108421	1.96454	-0.700693	0.377554	-0.694094	-0.328619	0.719862	0.479825
6.70471	2.29815	-0.172482	2.38462	-2.30693	0.256453	-1.05301	-0.106672	-0.289491	-1.02095	1.33349	-0.431652	1.34271	0.728657	-1.56806	0.450212	0.30008	0.4683	0.102592	-0.807679	-0.885102	0.325792	-1.30554	-0.13478	0.21645	1.24091	0.116961	0.0119599	0.4689	-1.06002	-0.645216	-0.658128	-0.759692	-0.110662	-0.146658	-1.26452	0.648429	0.0595472	0.0577794	-0.0708886	1.21105	0.760499	1.07184	-0.78095	-1.81697	0.697176	-1.68549	-0.900301	-0.850251	-0.115791
12.2675	-0.185512	1.68775	0.028234	-0.170858	-0.198608	-0.514421	-0.836854	1.23986	-0.0361438	-1.64067	0.421378	1.39085	-0.6902	-1.24803	0.148449	2.61985	0.679932	-0.0954464	1.35567	-0.220936	0.97923	0.732372	0.0428887	-2.28897	-0.651231	1.15642	0.224838	0.606379	-0.637833	-0.308869	1.31671	-1.2325	0.884167	-0.0189064	-0.236071	-0.00143932	0.920187	0.092818	0.142686	-0.466475	0.646973	-0.796558	0.513802	-0.133677	0.109813	1.94936	-0.910512	-0.649115	-0.542143
3.57498	-1.88703	3.44728	-0.814743	-0.916958	-3.24671	-0.876799	-1.04338	-1.76871	-0.373859	0.541674	-0.632864	-0.347794	-0.121721	0.890317	0.538095	1.18338	0.426168	-0.0693584	-0.380168	0.327338	1.28286	0.443936	0.403989	-1.7104	1.32496	1.82829	0.87664	-0.192181	1.56145	-0.720543	0.556072	-1.01575	-0.926593	-0.437661	0.00724874	0.378464	-0.490419	-0.918529	0.47565	-0.287776	-0.394371	-0.325361	-0.698096	1.21554	-0.536492	0.00986468	0.532216	-0.0304243	0.754994
-0.312142	-2.7034	1.35698	1.78768	-0.361436	-0.396807	0.589127	-0.349999	-1.25646	1.13094	-1.74838	0.450715	-0.769718	-0.219703	0.110065	0.0353777	-0.696386	-0.171326	1.11858	1.25954	-0.16543	0.0525103	0.457527	0.381435	0.367078	0.248328	1.15402	0.0329064	-0.132196	-0.631998	-0.0304522	0.730915	0.431694	0.467126	-0.490909	-0.794196	0.616794	1.19269	0.131261	1.28398	-1.15863	-0.7473	-0.463722	-1.12448	0.107171	0.304897	0.268181	-0.0864692	-0.393946	0.321932
0.0567331	0.568184	4.37409	-1.11778	1.17888	-1.3737	-2.88065	-1.94697	-1.56973	2.72119	-2.0803	-1.1343	-0.106461	-1.19941	-1.67608	0.327352	1.29192	-0.0359608	1.18955	-0.351554	-0.119409	0.987609	0.493146	1.0395	0.507248	-1.45873	1.06043	0.596986	0.942093	-1.21018	-0.239576	-0.717884	0.417394	-0.170886	0.279437	1.63604	0.600874	-1.50363	-0.0166343	-0.275651	2.12692	-0.685716	0.185805	0.151227	-1.17519	0.454224	-1.35554	-0.470823	-0.779305	-0.921891
19.0433	4.01789	0.629568	-1.43575	-1.23407	-2.05909	2.30911	0.805823	-0.968036	-0.952003	1.62649	-2.4051	-0.245396	-0.275844	2.07713	-0.256274	0.436728	-0.223839	-1.11832	1.13044	1.90505	-0.471934	0.737983	-0.290414	-0.444473	0.68922	-1.48143	0.403708	-0.358688	-0.817801	-0.487659	-0.962689	0.517445	0.588192	-0.0120469	0.478324	0.668745	-1.4518	0.354707	-0.0861322	-0.0229527	0.374038	0.584927	-0.124937	0.258816	-0.593403	0.332947	-0.882176	-0.554432	-1.75248
6.80748	0.714343	2.11224	0.729885	-0.299943	-1.08746	-0.00326455	-0.430478	1.27813	0.47722	0.085907	-0.430359	-0.440017	-0.502118	-0.99044	-0.258872	0.143162	-0.320351	1.02404	-0.755516	-0.0823934	-0.892905	1.28614	-0.546919	0.751943	0.645632	1.16576	-0.284645	-0.932855	-0.0472097	0.00711142	0.814552	-0.538783	-0.123681	0.787056	-0.256137	-0.0748604	-0.303228	-1.31625	-0.0187439	1.96578	-0.85134	1.43281	-0.567519	-0.0348637	0.358285	-1.67743	-0.0517806	-0.0711989	-0.209346
10.6691	0.421352	0.640568	1.09748	3.70201	1.47374	-0.0235992	-0.974892	0.672909	1.66333	-0.798051	0.835101	0.273688	-0.24595	1.06349	0.590794	-2.28067	-1.47445	0.85628	1.91829	0.70296	-0.99369	0.11284	-0.406497	0.0808641	-0.16764	-1.17667	1.04511	-2.16156	0.777105	1.08552	1.79753	-1.59053	0.432646	0.17636	-0.396182	-0.521148	-0.5581	-0.109596	-0.61021	1.38064	0.595846	-0.718833	-0.132489	0.917581	-0.375438	0.0616071	-0.974673	0.594275	1.6903
8.3759	-0.788086	0.0610038	-0.566973	2.52051	-0.108306	0.294715	0.80918	0.54047	-1.02706	0.391124	0.128347	2.17947	2.3012	-0.968267	1.20841	0.481347	0.908884	-1.76845	1.09717	0.190932	1.14259	0.252947	-1.2867	2.51187	0.0248845	-1.7192	-0.275912	0.303494	-1.1027	0.655106	-0.729484	-1.65114	0.71709	1.20415	-0.757478	0.0291936	-0.218643	-0.155422	0.429083	0.730639	-0.971252	-0.376826	0.601639	1.28239	0.352211	0.35815	-0.338746	-1.47106	0.0310017
13.8056	1.47706	-1.55606	1.08518	-3.77305	-1.53084	-0.559821	-0.663359	1.1393	2.16921	0.51852	-0.595952	0.818241	0.169894	0.291091	-0.471881	0.87865	0.385029	-0.226862	0.945505	0.666508	0.965277	-0.899018	-0.0915609	0.334119	0.36778	0.396622	1.87601	-0.748894	1.20586	1.26691	0.477457	1.1156	0.452621	-0.810607	-0.773382	-0.822856	-0.0351456	-0.371303	-1.02185	-0.276912	0.503203	-0.190102	0.373185	-0.539296	-0.417297	-0.369698	0.0859494	1.87561	1.62952
4.29355	-0.549826	1.8619	-0.825148	1.14671	0.707144	0.404173	0.187708	-0.0783269	0.208781	0.0611991	1.10819	0.513698	0.696229	1.22674	-0.815501	0.283413	-0.627518	-0.133669	-0.382347	-0.116543	-0.750985	0.114962	2.61864	-0.959818	0.633782	1.06864	-0.0610382	-0.843611	0.944886	-2.44292	0.0373203	1.23702	-0.484756	-0.742309	-0.0477706	-0.83702	0.624259	-0.0319662	0.204844	-0.202085	0.22974	0.575862	0.219735	0.276054	0.161465	-1.68369	0.619926	0.241124	0.671531
7.35961	0.101806	-1.39477	0.851006	0.718814	1.16723	-3.3355	-3.29385	0.321915	-2.22859	-0.0973007	2.82454	-0.985944	1.19527	1.19242	1.84245	1.02612	-1.73989	0.127259	-1.15178	0.692858	0.998575	0.421448	0.741064	0.728378	-0.148205	-0.712025	1.20222	-0.204691	1.41276	-1.27444	1.37189	-0.625268	1.45391	2.28349	-0.524961	0.665355	-0.204043	-1.16166	-0.371249	-0.215014	-0.194437	-1.55793	0.806462	0.684214	0.0799006	1.48784	-0.94975	-0.699795	0.300354
4.3852	-2.87049	-1.68925	0.916153	1.25737	-0.606515	0.670629	-0.848063	-1.59191	0.573777	-1.45047	-2.70092	-1.24788	1.5571	0.258123	-1.27425	-0.0113084	1.51561	-0.300336	-0.348692	0.333022	-0.216839	-0.188431	1.40842	-0.284157	-0.327783	-0.312407	-1.25349	0.0369346	-0.595372	0.0167015	-0.000637929	-0.743506	-0.323052	0.539708	-1.28548	1.52961	-0.746697	-0.582645	-0.848511	-0.681694	0.428971	-1.21068	-1.95092	0.259984	-0.885703	-0.239139	-1.25098	0.576982	-0.0300057
2.73574	1.09859	2.46084	0.780972	-0.718261	0.260704	-0.733682	-0.924428	0.26018	2.12275	0.385363	-1.21717	-0.138453	-2.41776	-0.00435738	-0.0997619	2.5288	2.88894	-0.418288	1.20856	-0.883754	1.27457	-0.767094	-0.115474	-0.16526	-0.320348	0.40015	0.728335	-1.20676	-1.14016	0.594621	0.76961	-1.00693	0.689266	0.23743	0.608803	0.379269	-0.0964258	-0.928428	-1.46137	0.32204	-0.546837	1.40485	0.310991	-0.885368	-0.456399	0.0795852	-0.560699	-0.340748	-0.687414
5.86319	-3.19452	-1.07569	-0.0555523	-0.598434	1.32694	-0.351517	1.25031	-1.82111	0.0558857	-0.313877	-2.01384	0.868049	-0.728585	-2.33347	-0.458134	-0.703641	0.744657	1.75339	0.297678	-1.34296	-0.190735	-0.154089	0.403074	-0.102243	0.355149	0.441482	-1.5154	0.656225	-1.39875	-0.934377	0.422575	-0.82201	-1.07748	-0.276129	-0.919788	-0.45206	-0.243357	-0.120478	-0.134689	-0.456497	-0.0493311	-0.592354	0.646943	-0.50089	-0.380379	0.40747	-0.404948	-0.325063	0.317222
14.8757	4.07733	1.72781	0.332025	-0.253396	0.550461	1.68884	0.704116	2.24284	-1.14954	0.828454	-0.222167	0.533811	-1.14707	1.43721	0.0309887	0.263593	0.0456832	-0.0692534	-0.23488	-0.294483	1.28187	-0.772113	-1.17521	-0.430959	-0.885391	-0.8981	0.728307	-0.165321	-0.40812	-0.78809	-1.613	-0.506264	1.65985	-0.541425	1.34503	-1.12437	0.623835	-0.119115	-0.247623	-1.25875	0.0541879	0.591067	-0.651284	-0.259006	0.553271	0.171398	1.3413	0.413953	0.0292699
2.44002	2.16622	0.542767	1.26463	-2.36726	-1.20935	-1.6126	0.841127	0.821204	0.0438646	-0.945055	-0.300338	0.417074	-0.204225	-1.57236	1.20726	2.72619	-0.776288	0.622513	1.04964	-0.613814	-0.365922	-1.65004	-0.0633158	0.64127	1.58591	1.55938	1.17125	0.142608	-0.540745	0.73765	0.0835695	-1.54474	-0.138346	-0.655448	1.79221	-0.623782	0.349581	0.775808	-0.478074	0.508568	-0.287181	0.733132	0.908589	-0.140545	0.539083	-0.0891388	1.10042	-0.837098	0.35987
12.681	1.04613	2.38816	-2.68314	-0.722512	-0.139661	1.21591	-1.69875	1.12778	1.94416	1.77162	0.205839	0.912948	0.420644	-0.770315	-1.15591	0.834189	0.967402	-1.69327	-0.266053	-0.821253	-0.397909	-0.433127	-0.612682	0.974815	-0.0275484	0.214435	-2.19789	0.734698	0.491261	-0.0707049	-1.17338	-1.31261	-0.374953	-0.743874	-1.82581	0.240964	1.08505	0.998715	1.60222	-0.203379	1.31783	0.507278	-0.878676	0.871007	-0.643508	0.917726	-0.747961	0.415926	-0.595685
9.65687	5.53814	1.72732	0.480553	-1.63987	-1.09802	0.3529	-1.57534	-1.12004	-2.23229	0.428186	-0.643985	-0.274139	1.75058	-0.0299422	0.910124	-1.39292	0.054885	0.294397	1.07738	2.27825	0.601474	0.361641	1.08433	0.00499031	0.942654	-1.70778	0.92795	1.26172	1.21925	0.364735	-1.38491	0.429196	-0.817714	-0.227157	-0.862767	-0.246737	1.11225	1.25658	-1.08895	0.0769196	1.31011	0.760878	1.47193	-0.816828	0.93396	0.641041	-0.125847	-0.054745	-0.572107
7.67718	-2.62814	1.65919	-0.45659	0.68339	-0.0821483	-1.15046	2.6296	0.407874	0.456399	-1.30906	0.4695	-0.291262	0.69205	0.0451813	0.91534	-0.929227	1.02733	-1.05988	0.64476	-0.111868	0.961638	-1.17405	1.11821	-0.447313	0.0743085	1.4328	-0.802864	0.529987	0.932406	0.197265	1.64389	0.899152	-0.580473	0.62025	-1.1646	1.38271	0.63201	0.43063	0.162226	0.114875	-1.12924	1.16088	0.942238	0.0804895	-0.345628	0.639578	1.32414	-0.127354	1.1287
13.6019	1.65179	0.571309	2.74578	-1.17497	-1.62894	0.136929	-1.13572	1.24221	-0.582356	2.37212	1.60601	0.202427	0.271969	-0.516216	-0.073126	0.0113289	-0.123024	1.105	0.875801	0.263424	-1.37758	0.617752	-0.95566	-1.67775	-0.125303	-0.815217	0.0777922	1.08254	-1.41748	-0.93599	0.674866	-0.0891685	0.254558	-0.0937213	1.56941	-0.634198	-0.826518	0.669024	0.444483	-1.34347	0.270342	-0.103575	0.968406	0.49182	-0.622984	0.203264	0.445652	0.359054	-0.260279
7.359	-3.03148	0.276831	0.1923	2.31178	-0.0281478	0.461573	0.169284	-0.388808	0.588117	-0.935432	-0.742382	1.20887	0.408994	0.772793	-0.344807	0.088942	-0.127951	0.556037	0.25534	0.591315	-0.120758	-0.057301	-1.70468	0.478805	-1.53856	-0.0393685	0.568958	0.426757	0.0477037	-0.276652	0.474392	0.835894	-0.669527	-1.44662	0.689609	-2.57998	-0.241017	0.562432	0.414789	1.31633	-0.109563	0.923312	0.244749	0.214717	0.970787	1.0457	0.197091	1.44138	0.70231
-0.89996	1.00067	4.71592	1.56556	-0.9813	-1.05922	0.459166	0.307048	-0.869399	-0.126117	1.99297	0.300519	-1.47394	-1.72407	0.538754	-1.57302	1.748	-1.96264	1.27805	-1.49436	0.0859793	-1.22708	0.395376	-1.20109	-1.16264	-0.0565072	0.264364	-0.657003	-0.252898	-0.265288	-0.822407	-0.686665	0.462689	0.178267	-0.10743	0.364174	0.269167	1.30885	-1.3275	0.354179	1.11997	-0.505285	-0.241024	0.0563176	-0.671794	0.898364	0.165017	0.621733	-0.24615	0.369841
5.445	-0.705325	-0.210556	1.16705	-1.7382	-2.4264	1.3669	-2.29298	0.692229	-1.53132	0.095491	-0.702866	0.738822	0.0932555	-0.0327916	-1.69424	-1.22471	0.662604	-0.256833	-0.459822	1.17326	2.05802	1.85997	-0.395691	0.310504	0.798984	-1.71826	-1.37893	-1.82545	0.594393	-0.618207	-0.079169	-0.161851	0.795503	-1.17916	0.0147541	-1.66914	-1.16573	0.0887692	-0.43276	-1.31699	-0.468959	1.80656	1.50404	0.747878	-0.122055	-0.950776	1.25502	1.32738	0.137897
-4.70218	-1.2364	3.42245	-0.377832	-1.65529	1.56324	-3.34149	0.583473	0.248766	-1.92343	1.16067	0.867938	0.735614	0.545733	0.846763	0.118386	-0.61982	-1.0955	0.0574889	0.769452	1.44418	1.29148	1.27568	-1.22464	0.136344	-0.35791	0.342835	-1.36119	-0.659878	-0.171812	0.21471	-0.0319402	0.934734	0.422127	-1.47084	1.81177	-0.549474	-1.37696	-0.723818	0.454173	-0.885943	1.00265	-1.7032	0.647082	-0.13613	-0.84173	-1.11586	-1.5671	-0.310202	0.0195216
2.53013	-2.11225	2.25375	0.315623	2.12352	-0.836912	-0.595194	0.551011	-0.113538	-1.51857	0.40467	2.0261	0.145923	-0.280121	1.06296	-0.387231	-0.304983	0.582031	0.0134912	0.195346	-1.01163	-2.19155	-1.86971	0.123868	0.26764	-0.333008	0.768725	0.669665	0.759879	-1.08073	-1.17222	0.490325	-0.652743	-0.66623	1.01813	-0.589875	-0.0164916	0.963822	-0.443681	0.0390729	0.0278987	0.444456	0.808939	-0.565873	0.552909	0.127853	1.36715	-0.990446	0.454496	0.909576
8.3099	-1.6585	-0.649087	-0.041198	0.0192867	-0.578635	1.93963	-0.123094	-1.70304	-0.333796	2.65353	2.98311	-2.06567	-1.64652	-0.959994	-0.518684	-0.104227	-0.309802	0.246933	0.931871	0.587993	-0.0360595	-1.9052	-0.446358	-0.75584	-0.7578	-0.0143526	0.190558	-1.34725	0.39552	-0.957963	1.3975	-0.948159	-0.106667	2.21784	-0.979076	0.0875379	0.922256	-0.527462	0.0131646	-8.23735e-06	-1.12956	-0.564579	0.533079	0.286972	0.973586	0.481303	0.968608	-0.363157	-0.880095
14.9646	1.52727	1.25027	0.78993	1.35138	0.403113	-1.45528	0.542927	1.17915	1.72403	0.667	0.736481	1.22123	1.20601	0.285716	0.370408	-0.995734	-1.54531	1.24972	-0.987627	1.19879	-1.0149	-0.870894	-0.344351	0.359986	-0.245501	-0.653768	-1.25994	-0.431262	0.0361871	-0.71493	-0.333832	-0.503381	-0.442235	0.750481	-0.671689	0.400686	0.0641217	0.586981	0.451605	0.397551	0.982839	0.205335	1.38965	-1.89467	0.33891	0.463109	1.46795	0.385741	-0.437156
9.37537	0.201063	-0.117004	0.311865	0.100505	-1.63473	0.486746	0.442872	1.28217	0.0740201	0.0176618	2.11515	-1.07725	-0.588982	-0.193465	-0.252305	1.04284	-0.302428	-0.155614	0.154457	-1.66266	-0.444545	0.0594867	0.935953	0.219608	0.229158	-0.674133	1.57296	-0.387428	1.33504	-0.388535	-0.597891	0.794448	0.822081	-1.11398	-0.484071	-0.0653244	0.640163	1.6397	1.00379	-0.429219	0.159513	0.41348	1.43828	-0.391234	-0.331279	-0.668584	-1.10251	-0.804946	1.43887
6.52461	1.30412	-0.421342	-0.545337	2.34682	-0.130171	-0.438972	-1.69585	-1.35712	1.1443	-1.86815	0.0189997	0.352521	2.97834	1.23073	0.472732	0.115205	1.34797	0.29865	0.491019	-1.10139	0.991126	-1.66336	-1.31893	-1.95199	1.52321	-1.30607	-1.97554	-0.61189	0.560053	0.149163	0.563371	-1.53715	0.747918	0.405187	-0.523533	-0.418461	-1.0763	1.06778	-0.240965	0.321484	0.0751833	0.12509	0.15441	-2.79875	-1.19075	-0.570393	-1.38889	-1.22548	1.37416
7.69243	2.23631	2.63648	-2.42502	3.93196	-1.21866	-0.0004469	-0.604701	2.62987	-1.07962	-3.40164	-1.43178	1.09599	0.830735	0.214027	1.25118	0.981547	0.868846	-1.56068	-0.897465	0.343225	1.33771	0.530412	2.99855	-0.29649	0.820636	-0.405485	0.686841	0.160507	-0.0293944	3.06264	-0.276309	-0.855115	0.40707	-0.298298	-0.307439	-2.81644	1.0119	0.688218	-0.336738	-0.124882	0.280732	-0.487644	0.924949	-0.134494	-0.247447	0.712732	-0.180285	-0.919849	0.205392
11.2382	2.20471	2.33927	-1.31383	-2.54154	1.09523	0.23671	-0.685568	-0.273232	0.88876	-0.798361	-1.84158	-0.207932	0.568055	0.756184	-1.23829	-1.22538	0.962292	-0.393503	0.785651	2.24959	1.00336	0.21473	0.189138	-0.293687	0.773624	2.42038	1.00405	0.364238	-0.0906481	0.0875355	-1.23759	-0.602827	0.299308	0.675676	0.912939	-1.19857	-0.533319	0.0546639	-0.279222	-1.45439	0.379958	0.79191	-0.274311	0.876164	-1.29646	1.40907	-0.975581	0.859023	0.815203
17.5697	1.64847	1.59948	0.776794	0.69437	0.288649	0.933654	-0.0809768	-0.593092	-1.52326	-0.374071	-2.24573	1.90089	-0.972237	-0.24771	-1.32648	0.72968	0.366262	-1.05653	0.455849	-0.366799	1.30242	1.53229	-0.075617	-1.38123	-0.407668	-0.916705	0.343935	1.72575	0.831792	1.29055	-0.363547	0.174523	-1.00106	-0.503537	0.594861	1.65687	-0.132628	0.731285	0.713314	1.14164	-0.248923	0.307429	0.039834	-0.103368	-1.82323	1.25832	0.925686	0.884962	0.435084
4.74548	-0.181929	2.89906	0.871317	2.52236	1.29657	1.31106	-1.43246	1.56333	-0.904007	0.129403	0.0012722	0.448731	-0.852584	-0.537103	0.329437	-0.767403	-0.986292	0.865413	-0.581631	1.07172	0.816313	-1.02489	-0.483402	-0.384267	-0.126069	-0.0996481	2.35232	1.1914	-0.331799	-0.398693	-1.37721	0.394718	-0.0305938	-0.160236	-0.0713375	1.32993	-1.21021	-0.948148	2.45932	-0.367269	-0.184713	0.209792	1.54746	-0.839017	2.14738	0.0358673	-0.638424	-0.0450875	-0.983131
6.56106	-1.47307	-0.934239	-0.0920766	1.01686	1.31629	0.497373	-1.97333	-2.12286	-0.718953	0.579665	-0.284127	-0.498046	3.30164	-1.77845	-1.21833	-1.2767	0.0365105	-0.277674	-0.596259	0.325223	-0.142272	-1.22298	1.95767	-0.120455	0.335455	1.95057	1.43977	0.630836	-0.631046	-0.660097	0.0782458	-0.167532	1.90299	0.681032	1.53632	0.73149	-1.14299	0.0873853	0.150409	0.591009	-0.598668	-0.581303	-0.243868	-0.376335	1.202	-0.290187	0.582687	-1.17425	-0.38043
1.74134	1.0188	-3.53818	1.60755	-1.92656	-0.0434826	-0.892268	0.822457	1.56123	-1.2736	-0.810633	1.05837	1.50494	0.460199	2.37715	-0.292237	0.574465	-1.07733	-1.87098	-1.76442	1.08057	1.84013	-0.132961	-0.0388106	1.41827	0.636015	1.2493	0.270269	-0.298681	-0.981798	0.647445	1.52081	-1.18711	-1.22563	-1.80746	-0.384825	0.632921	0.268217	0.483355	0.736674	-0.155409	0.204239	0.509873	-1.90599	-0.267273	-1.15359	-0.744411	-1.15725	-0.435686	-0.129563
5.28643	2.63519	1.32474	0.760791	1.14147	-1.24259	-0.495865	-0.556409	-1.27375	0.118325	-1.24712	-1.82389	-1.02155	2.45627	0.601281	-0.720921	-1.0218	-1.34427	0.340168	0.169774	0.0088386	-0.594527	0.605667	-1.13784	-0.680194	-0.39082	0.220462	0.18981	1.18031	1.17783	1.37173	0.620612	-0.635113	-1.26591	-0.340466	0.0830458	1.08902	-0.0473254	-0.231499	0.287539	0.802982	0.198849	0.0687913	-0.00373959	0.143704	-0.442899	1.34849	-2.18272	1.3926	-1.11878
5.53435	0.704504	-0.433395	0.53713	-1.11811	1.41343	-1.11818	-0.439069	0.267196	0.46182	0.629302	-0.837058	-0.562906	-0.490703	0.54633	-1.04479	0.0378975	-0.0373582	-0.0808042	0.159469	-1.04068	-0.62944	-1.06116	0.670189	-0.233886	0.303378	-0.810032	0.446503	-0.0314302	-0.904903	-1.34057	-0.424277	1.09906	0.309062	0.21871	0.316486	0.0832968	0.0680343	-0.65397	-0.21309	-0.464076	-0.561194	0.756988	-1.41493	-0.00146883	-1.1663	-0.322864	0.171437	0.936188	-0.948764
-0.934058	2.58053	2.14286	-0.385563	0.128403	0.152792	-1.74372	0.360395	2.0166	-0.258023	-0.103864	1.28415	0.762034	1.51409	-0.745717	-0.572641	0.0577392	0.990347	1.07987	-0.503107	-2.66467	-2.59189	-0.0325624	-1.2348	-0.0392655	1.55261	0.434368	-0.156323	-1.20247	-1.02458	1.10945	-0.630801	0.403167	0.620196	-0.320502	-0.465856	1.13874	-0.282925	-0.0511075	-0.307374	-2.05309	-0.648551	0.429097	-0.764221	0.204191	-0.0503746	-0.113109	0.760653	-0.20785	0.224093
14.2743	3.51481	2.00467	0.0145129	0.577511	1.07742	-0.631408	-0.783882	0.335721	0.606152	-1.51483	0.242556	0.0957429	1.771	0.0439542	-1.31683	0.325383	-1.83986	0.0133285	0.360844	-2.6238	-0.642165	-0.400448	-0.799953	0.719355	0.684195	-0.321264	0.81553	-0.178809	0.532129	-0.0992331	1.26507	-0.701612	-0.31293	1.05696	0.202736	-1.50322	-1.90741	0.546239	0.428964	-0.564801	-0.164674	1.22009	1.24783	-1.68042	0.00127819	0.00284751	-0.719733	1.20322	-0.496475
-5.1478	3.24442	4.40339	-0.476638	-1.72442	-0.424814	-0.218095	0.838829	2.25412	-0.321637	-1.36497	1.31223	0.0484225	0.915737	-0.244734	-0.0167329	0.574547	0.143177	1.49069	0.28041	-0.437075	-0.519445	-1.77375	0.663598	0.992122	0.273245	-0.429482	0.00987574	-1.36554	-1.35129	0.867545	0.399917	0.524768	-0.102299	-0.20056	-1.14487	0.656735	0.35434	0.521429	-1.30778	-0.529709	0.106072	-0.620881	0.453836	-0.0742731	1.01982	-0.470591	0.0621514	0.316593	0.108629
13.3181	0.399769	-0.64883	0.411295	-2.04616	1.29219	0.290359	-0.230779	1.7519	0.992025	-0.335585	-0.637944	0.150696	0.0463382	0.151329	0.312865	0.0685507	-0.709908	-1.00618	-0.339811	1.29515	0.230523	0.446419	-0.36282	0.853983	-1.01609	-2.17514	0.560362	1.53	-0.687997	1.45903	-0.526824	-1.21347	1.3779	-0.366254	-0.685326	-0.682429	1.79896	-0.441981	0.808263	0.537068	0.855235	-0.639336	0.0434913	1.01602	-0.369516	-0.354715	0.425279	1.05358	-0.925604
25.6564	2.44573	1.61929	-1.07951	-0.69188	-2.11822	4.1644	1.42055	2.19124	-0.872759	1.90413	1.20108	0.914496	1.40703	-1.36203	-0.573596	0.0209159	0.392551	-1.08094	-1.29935	0.992955	0.123695	-1.07603	0.994542	-0.694221	-1.67809	0.00276462	-0.148969	0.104981	-0.971914	1.28698	-0.287643	0.559948	-0.827651	-0.477119	-1.08889	-0.735081	-1.26183	-0.401033	-0.707593	-2.11163	-0.354728	-1.46936	0.940014	-0.932381	0.27522	-1.14098	-1.07234	0.922759	-0.942826
5.56596	-0.799674	0.456926	2.14817	-1.75685	-0.168767	1.82962	-2.10665	0.640382	-0.658957	1.07361	2.12457	2.03669	1.84226	-0.678516	0.781037	-0.082041	-1.34269	0.354376	-0.421875	-0.415819	-2.06162	-0.981562	-0.696769	-0.0294648	0.933926	0.574408	-0.168538	-0.296632	-0.34681	0.254286	0.0397461	-0.793533	-1.02855	-0.0112665	-0.13085	0.888163	0.627147	-0.125741	0.73995	1.02702	0.82671	-1.74503	-0.691741	-0.338016	1.23271	-0.0209758	0.458629	0.0286075	-0.621713
9.34291	-0.158592	-0.789158	1.0369	1.7409	-2.31862	-0.74803	1.04417	-2.96005	0.933797	0.0985915	-1.77075	-2.102	0.443307	-0.864455	-1.07979	0.17788	-2.0969	0.017702	-0.727574	-0.0187096	-2.20711	1.64383	0.864146	0.241171	-3.055	-0.697743	-1.30957	0.194931	0.535659	1.01809	-0.878218	0.332246	-0.921358	-0.979428	-0.14037	0.851563	-0.66954	-0.093929	-0.59987	-0.13551	0.106	-0.242431	0.0370963	-0.363558	-0.107901	0.0676809	-0.0272555	-0.00756068	0.371348
7.96382	-0.734183	2.04455	-1.16749	-2.41104	1.69764	-0.887914	-0.658731	0.589297	-0.913149	-1.07145	-0.480498	-0.832476	-0.303992	0.326401	-1.48315	-1.27505	-1.03757	-2.69307	0.54095	0.178508	0.0792843	0.270632	-0.869677	-1.49264	0.0463627	-0.105739	-0.235969	1.08704	1.31748	-0.180633	-0.589811	-1.33008	-1.1302	0.843131	1.69512	-0.687988	-2.12271	0.34114	-0.646434	-0.186368	0.750074	0.825268	0.386093	-0.612984	2.03136	0.820019	0.374874	-0.454892	-1.52103
11.7447	1.566	1.86676	0.171555	-1.57723	2.65645	-2.52498	0.548092	1.36461	0.88155	-1.97806	0.920905	-1.82419	-0.335529	1.6541	-1.56413	0.48797	1.21088	-2.03474	0.0519283	-0.081921	-0.0145562	0.845663	0.27791	0.53242	0.50192	1.05499	-0.809326	2.95764	-0.59092	-0.792286	-1.28472	-0.0815722	0.715292	0.87836	-0.355091	0.599554	-0.434481	-0.716748	0.287223	0.940636	-1.50486	0.490913	-0.464329	-0.979654	-0.0659315	-1.66779	1.07537	0.893167	-0.128324
5.32557	-1.75514	0.0637396	0.125018	-3.23911	-0.951214	0.620628	-1.15372	-1.63953	-1.22849	0.268726	-0.599559	0.112441	0.468337	0.24574	-0.732279	0.320346	0.961813	0.930437	0.650175	0.524339	0.415868	0.90511	1.12761	-0.723338	1.10258	-0.0589101	1.14894	-1.18487	-0.373874	0.782404	0.838242	-0.56122	-0.027073	0.85573	-0.790333	1.09854	1.0247	0.186758	-0.470405	0.0100262	-0.123464	-1.13658	-0.249941	-0.11622	-0.578195	0.329269	1.08499	0.818471	0.50087
1.48085	-0.423613	1.17431	1.1275	0.455166	1.26248	1.57724	-0.264622	-0.672879	0.140966	0.239878	-0.000801197	0.851694	-2.21851	-0.366289	0.553058	1.64379	-0.369891	-0.94099	0.457571	-0.59956	-0.00657638	-0.163189	0.148671	-1.19811	-0.157322	2.10524	0.57197	-0.907397	0.434008	0.478252	-0.791563	-1.19356	-0.760831	-0.354617	-0.17247	-1.116	0.214706	-0.200371	0.474259	-0.622337	0.668052	0.522532	-0.138864	0.677785	-0.328777	-0.0089208	-0.868072	-1.2335	0.5004
10.2365	-0.369213	1.92719	0.51678	1.12766	1.09725	-0.346071	-1.71308	0.667948	0.779424	-0.971864	0.653945	0.0891944	0.350825	-0.184758	-1.86254	0.628925	-0.434864	0.358796	-2.01131	-1.11951	0.0883519	-0.713588	-0.447353	-1.18011	1.57046	0.221609	-1.3236	0.634161	1.52731	-0.199289	0.396294	1.56074	-0.227577	-0.326524	-0.00276853	-0.847229	-0.0612232	-0.372507	-0.0441198	0.720545	0.796982	-0.557482	0.0344647	0.144116	0.0265658	0.988007	0.657275	-0.836329	0.127675
0.551846	0.950007	-1.58459	3.55632	-0.877227	0.234436	-0.505919	0.125591	0.491906	-2.18732	1.0472	0.192696	1.67869	0.280663	0.362672	0.0229856	0.0613296	-1.20195	1.33138	-1.58908	-0.315667	0.428259	-0.982635	-0.455822	0.610538	1.35691	1.23792	-0.236172	0.191111	2.07299	-0.797869	-0.683067	0.193174	0.0944915	-0.460523	0.300146	-0.118179	-0.441511	-0.674703	-1.28815	0.63778	-0.227348	-0.467768	-0.617839	-0.705178	1.00028	-0.0471384	-0.244969	0.0682024	-0.934547
7.57686	2.93094	3.02111	-0.210785	-0.437407	0.620812	-1.53136	-1.85687	0.813223	-1.68488	0.432165	0.593486	1.79661	-0.904765	1.05829	1.17314	0.100377	-0.650977	-0.103427	-2.5649	1.60679	-1.9344	-0.22542	0.191413	-0.892276	0.0554739	0.982845	-0.708059	0.677822	0.161534	-0.525139	-0.399637	0.0873643	1.09672	-0.208669	-1.27106	-1.47062	-0.959328	0.0811385	0.197812	0.296867	-1.05076	0.446581	0.43746	-0.601595	-0.521143	0.298151	0.192092	-1.14976	1.53448
6.70667	-0.802605	4.6717	-1.69508	1.97287	-0.845069	-0.861072	-2.03251	1.50799	0.180231	-0.465245	1.46031	-0.672651	0.597134	-0.243193	-0.353875	0.313557	-1.38049	-0.0660546	-0.560317	-0.736624	-1.06885	0.198753	-0.285358	0.9642	1.67915	0.741239	1.52005	-0.000874378	-0.319339	-0.0557655	-0.926204	0.74706	-2.00433	-0.908013	-0.625908	0.178538	0.54972	-0.420118	0.131101	-0.374102	0.0732912	-0.228767	-0.236671	1.43669	0.255226	-1.03094	-0.132103	-0.568895	-0.434283
6.99794	2.51204	0.109832	-1.55436	-0.813813	1.65378	-2.21552	-0.337923	-3.50483	1.34985	1.30976	0.415116	-0.704045	-1.03776	0.186754	1.70036	0.01066	0.0523344	0.552662	0.97916	0.454397	0.0223892	-0.450315	1.07613	3.01833	0.110064	0.0367128	-2.3807	2.69041	-0.513404	0.334714	0.229861	-0.296229	-0.248603	0.85067	1.6264	-0.0464067	0.826578	1.10837	0.47345	-1.27968	0.779782	-0.562621	-0.0524612	-0.328949	-0.0989023	1.11321	0.0318774	0.834803	0.565669
11.0053	-3.32393	-2.58351	-1.66609	-0.0765433	-0.949361	-1.89917	0.113371	-1.73589	-0.731758	0.96304	-0.82077	1.1834	0.427612	-0.612002	-0.737881	0.804482	1.28081	-0.944629	-0.0962929	-0.00513173	-0.518159	-0.508545	-0.743496	-0.699263	-0.881673	-0.585491	-0.167145	-1.02131	-0.473272	2.2779	-0.39632	-0.310378	0.178225	0.227049	1.73351	-0.209264	-2.02249	0.707216	-1.67217	-0.763505	1.02053	-0.760368	-0.688795	-0.243812	0.58828	-0.799601	-1.1278	-0.157741	0.523796
3.93687	-0.00873912	0.449918	1.06004	1.50013	-1.74232	-1.4879	-1.08287	1.18104	-1.16834	-0.610844	-0.482706	1.22523	-1.19464	-0.383098	0.763885	-1.5761	0.668068	0.17065	-1.0721	0.294081	0.441417	0.301727	0.367153	-0.0398157	0.0772002	0.950781	-0.828045	0.817891	-1.97285	-1.44892	0.33463	-0.458298	-0.640455	-0.188081	1.77036	0.939656	1.25203	-0.778049	-0.0783495	0.641433	0.805491	-0.225833	-0.57591	-0.632976	0.69782	0.573127	0.311789	-0.805118	-0.812946
0.67578	-1.9547	2.92469	-0.136564	1.45519	0.609654	0.777155	-0.0251178	-0.341245	-1.38802	0.857479	2.79245	-2.45237	-0.456888	1.75664	0.829737	0.359517	1.23908	-2.61409	-0.0292384	0.619241	0.372376	0.255505	-0.0676794	-0.530549	0.327019	-3.03241	-0.515911	0.876943	0.158592	0.0855293	-0.289084	0.397624	-0.40215	-1.54234	0.615155	-0.209557	1.37968	-0.268212	-0.0042848	-0.961806	-1.11939	0.368573	-0.974318	-1.21754	0.196847	-0.172513	0.538109	-1.40244	0.225077
15.0261	0.442802	-2.03459	3.01812	1.23197	1.0609	1.582	-2.27099	-1.17828	1.43639	0.637828	-1.89498	-0.00166359	0.196199	0.945368	0.558454	1.00766	2.09328	-0.155899	0.298724	0.0135129	1.912	0.472607	-0.656081	-0.914973	-1.99541	-1.09673	-0.630772	2.96658	-0.445786	-0.601975	0.54707	-0.16309	0.365726	-0.306069	0.269709	0.276763	-1.46054	-0.391149	-0.579144	1.00989	0.578745	-0.0318253	0.814065	0.45606	1.24951	-0.827631	-0.526656	-0.0346991	1.74041
10.2702	-0.416403	-1.63768	0.430066	1.72621	1.61024	0.0431749	0.939517	0.587485	1.54858	-0.159809	0.0245021	2.15962	1.66465	-0.360235	1.56409	-0.0882704	-0.244777	-1.34004	0.676846	-0.792535	-0.534195	-0.019122	0.301549	-1.15327	1.81112	0.377318	-0.416013	-0.624683	-0.289956	-1.69384	0.733551	1.49465	-0.967473	1.57242	-0.305851	-0.215124	-0.132517	0.299283	-0.918204	-0.215546	-1.4557	-1.39002	-0.217879	1.00553	1.14189	0.404771	-0.333466	-0.892315	0.520213
18.2879	-0.497635	-0.599126	-0.427225	1.03478	0.611213	-0.057152	-1.32442	0.728993	2.60231	0.539696	-0.7222	1.22615	0.073834	0.575645	-0.0955115	0.574045	0.457386	0.277815	-0.790601	-0.488278	-1.40432	1.71943	-0.06262	1.45546	-0.367217	-0.00979256	-0.246685	-1.51737	0.148	-0.221403	0.205205	0.830857	0.72927	-1.64445	-0.392251	0.388623	-1.1641	-0.0856987	-0.399628	0.033829	-0.449209	0.239155	-0.405963	-0.00280762	1.44093	0.219124	-1.01934	-0.0841919	0.94808
4.10889	0.900986	1.40107	1.65245	1.13613	0.544154	1.75395	1.4721	-0.100683	-1.12855	1.46855	-0.43994	1.63272	-1.51789	1.20402	0.655671	0.448604	0.0562408	-0.587609	-1.5588	-0.043558	1.38149	0.322944	-0.00583715	1.28642	1.0929	0.407816	-0.159893	-1.05016	1.79179	-0.590964	0.446467	0.0178225	-0.7681	0.726422	-0.258482	0.143833	-0.623893	0.662304	-1.10675	0.615342	0.746022	-0.248483	0.361941	-0.457441	0.699181	0.145538	0.0648463	0.0505252	-0.699099
5.93994	-0.139381	-0.789708	1.64287	-0.082161	-1.6825	-0.0578	-0.302194	-0.434028	1.59589	-0.999723	-0.0735536	-1.41882	0.258509	0.684547	0.637065	-0.356628	-1.42548	1.20236	0.352708	-0.0331801	1.56495	0.0724089	-0.629899	-0.799251	0.542087	-1.43105	-0.323251	-0.0896209	1.63007	-0.868211	0.3979	-0.277199	1.80785	-1.02342	1.14476	0.939424	0.342513	-0.104379	0.175971	-1.01397	0.371176	0.463463	-0.512422	-0.72192	-0.938408	0.315452	0.415636	0.377364	-0.503089
4.34604	1.41085	-0.0580141	2.301	-0.354889	1.31926	-1.17958	-1.41129	1.60278	2.06178	-0.265319	-0.329347	0.870127	1.1065	0.785319	-0.145401	-0.128681	-1.50332	0.39595	0.60546	-1.13317	1.81905	0.967493	0.759924	-0.082664	1.12945	0.00634508	-0.213146	0.403145	-0.0175524	0.363491	-0.510981	0.770105	1.03598	-0.568435	-1.20641	0.366847	-0.257285	-0.440241	-0.155011	0.856111	0.615556	0.792063	-0.403909	-0.791719	0.376589	-0.52044	1.41632	0.218994	-0.618687
6.16299	0.182823	-0.747327	2.29582	0.714703	0.0109949	1.5431	-0.33395	0.181732	-0.329905	1.89159	-0.0479946	0.181633	0.990748	0.246534	-2.27092	1.3463	0.328044	0.630808	0.264495	1.1605	-0.844144	-0.192126	-0.450856	0.904086	-0.646178	0.102364	-0.996816	-0.346108	-0.590394	1.82489	0.187395	0.924271	-0.420409	0.0991936	-0.419619	1.43134	1.05193	-0.810463	-0.0610951	0.0441601	0.89863	0.0742937	0.802349	-1.79584	-0.347836	-1.9065	0.234747	1.33039	0.368705
17.9445	1.56651	3.24218	-0.675271	1.48076	-1.32833	-1.22092	-1.1533	0.700179	-0.000300512	-0.288128	-0.130479	1.24428	-1.45632	-1.05895	-0.572932	-0.619122	1.13532	-0.539341	-1.8121	-2.71617	1.55228	0.276833	-0.716216	-1.15613	1.14465	0.38891	0.0234434	0.50674	0.114392	-1.34628	1.19278	0.153887	-0.20204	-0.698416	-0.577294	0.785495	0.385551	-0.478286	-0.390909	0.448109	1.41045	-1.02126	2.13466	0.496006	0.904523	-0.976938	-0.494196	0.539523	1.43185
2.17221	-1.04952	-0.202679	1.28762	0.0131161	-1.08929	0.562027	0.533108	1.83018	-0.191507	1.49797	-1.26505	-1.31309	0.0330305	0.473894	-0.191357	-0.851239	-1.28907	0.45628	-0.704569	-0.613779	0.923822	-0.762852	0.988206	2.90249	-0.520442	-0.552546	1.44917	-0.664652	-0.000303794	-0.397129	0.131405	-0.095168	1.01852	-0.583185	0.227978	-1.44221	-1.4409	-0.350989	0.40386	-0.780581	0.240289	0.13162	-0.880508	1.06643	0.635396	-0.349586	0.781736	0.637063	0.370159
15.775	-0.148944	-1.67044	-1.07983	-1.73463	-1.05282	-0.254923	0.623574	-0.434381	0.672183	0.25331	2.1636	-1.12692	-1.7526	0.283438	-1.34696	-1.14913	0.468721	0.424028	0.940179	0.668823	0.231312	-0.0660793	0.362361	1.45085	0.588481	-0.600237	1.32358	-0.892993	-2.30276	0.144441	0.113681	0.3161	1.43211	-0.95219	0.619681	0.0595795	0.164041	0.846566	1.38764	-0.861106	-1.63173	0.459086	0.506228	0.825286	0.757329	-0.479558	-0.0055738	0.788918	-0.987662
9.31019	2.3019	0.94123	-0.827327	3.40627	1.17314	-0.754956	-1.51238	-0.563539	0.269413	-1.37468	-2.50438	1.08175	0.296993	1.93807	0.881559	-1.26612	1.97085	-0.0626914	0.926301	1.12813	-0.162393	0.0897576	0.516837	1.31871	-0.853613	-0.561322	-0.520089	-1.5231	2.00623	-0.566701	0.214951	0.526842	-0.0494101	-0.811085	0.94778	-0.249829	0.192631	1.10614	-1.1577	-1.40147	0.96371	0.192647	-1.24428	-1.85074	1.11244	-0.542656	-1.0209	0.970481	0.31685
13.1185	-1.06011	-0.696191	-4.53971	-0.239837	0.836416	1.02354	-2.37375	-1.40087	1.47599	1.53857	-0.698497	-2.17344	-2.74136	1.67496	0.85781	0.0805718	-1.54065	-2.69043	-1.04507	2.05535	-1.43565	0.0413469	0.356895	-1.52433	-1.60951	-1.0791	-1.14368	-2.96385	-0.247492	-0.294297	0.907572	-0.568243	1.37116	-0.832627	-0.259781	0.301912	-0.181329	0.706222	0.315204	0.59902	-0.0523202	-0.307462	0.312459	0.216088	0.613376	-0.369888	0.236422	-1.55521	-0.506226
10.789	-1.55761	0.438256	-0.327417	1.68785	-1.12333	0.161209	0.681234	-0.165355	1.22198	-0.958448	-1.77027	-0.178381	-0.430332	-0.924638	-0.540413	-0.989012	-0.851928	1.57195	0.423531	-0.601706	1.70376	3.18812	-1.23912	0.213367	-0.0785387	-0.263252	-0.83857	0.0748456	-0.9245	-0.53608	-0.0618832	-1.01298	0.322418	1.55132	0.331528	-0.473835	-0.365134	0.341064	-0.199688	-0.815369	-0.779292	-0.149213	-0.385827	-0.414649	-2.5891	-1.75616	-0.41326	-0.359533	0.491645
14.4995	2.47672	-0.591142	-1.96754	-1.41737	-2.94244	0.273121	-2.43811	-0.982134	-0.412495	1.4299	0.895603	-1.34494	-2.07808	0.163084	-0.149594	-2.09506	-1.55194	-2.15762	2.09187	-0.796283	0.357497	-3.11463	0.590784	2.62478	-2.0706	1.20336	-0.240735	-1.66635	-0.784518	0.130865	1.69144	0.295149	1.36532	0.423011	0.0949862	0.762785	-1.7203	1.38042	0.164199	-0.310882	1.89625	-0.741513	-0.521173	1.22964	-0.915187	-0.894823	2.67653	0.116333	1.43582
-3.89017	-3.46813	0.844739	2.65927	-0.00570221	0.123067	0.0996547	0.754868	-0.785307	-1.35483	-1.11278	0.196782	2.16189	0.660195	-0.509959	-0.937932	-1.01112	0.00413622	-0.786772	-0.331288	0.448718	-0.109024	-0.393672	0.00145724	-0.405124	0.231995	-0.64052	0.506976	0.0411778	0.866399	0.114576	-0.525657	1.27281	1.0753	1.64087	0.202299	-0.751129	0.42008	-0.641719	1.13531	0.851652	1.03867	-0.814485	0.106023	0.829331	0.296367	-0.737069	-1.44968	0.733507	1.08849
10.0875	-1.06493	-0.425492	1.27901	-2.44496	-0.114808	0.389872	1.60203	-0.989746	0.631155	-0.48848	-0.680963	0.116395	-1.19372	0.398669	-0.400806	-0.678412	0.84075	1.08422	-0.148707	0.449417	1.25755	0.827064	-0.863741	2.05594	-1.03652	0.599502	0.61785	-1.71745	-1.21041	-0.0071753	2.78539	1.30209	0.141957	0.281463	0.200082	0.463513	0.206879	0.514662	-0.338986	-1.7467	0.915628	-1.35237	0.866146	-0.706599	-0.187085	0.00675673	0.0549859	-2.13963	-0.0725729
1.92393	-0.234848	0.80631	2.21572	0.0470948	-0.801822	-1.60325	-0.408722	-0.182922	-1.05822	0.877625	-1.98783	-0.0223535	2.01243	-0.585575	1.67626	1.92403	0.390086	2.43992	-0.256951	-0.479822	1.14549	0.989485	-0.154961	-1.59525	1.49563	-0.429303	-0.760207	0.750751	0.628171	-0.429141	0.500152	0.169124	-0.856141	0.282145	-0.0275078	0.15109	0.851922	-0.613959	-0.992068	0.770927	-0.13964	0.518911	-1.28463	0.356908	0.422775	-0.784738	0.866887	-0.254606	0.316221
5.31276	-0.0216642	1.38375	0.587487	-0.86961	-0.71047	-0.97386	0.867802	0.0778443	-1.49055	-0.674605	-0.855612	0.442398	1.73964	-0.640966	0.826144	0.599643	0.693749	-0.111126	0.278495	-0.595797	0.412344	0.285029	-0.649294	-1.30629	-0.60875	-0.0954354	0.887872	0.216634	-0.723813	-0.875615	-0.757744	1.58477	0.634175	0.662163	0.321001	1.36643	-0.92009	-1.16266	0.0219709	-0.357319	0.299077	0.784678	0.416938	0.260849	1.4336	0.0450042	0.216106	0.55886	-0.308479
2.70489	-1.86895	1.40537	-0.30821	-1.19262	0.0907175	-1.90901	-1.48272	-0.318287	-1.06851	0.0173885	-0.377018	-0.019211	1.39472	-0.301973	-0.685344	0.724631	0.116521	0.290689	0.480885	-0.429248	0.713447	0.519975	-1.40069	0.281721	-1.71968	0.753031	0.00100577	-1.14198	-0.0486336	0.0712026	0.184119	0.612962	-0.789404	-0.920098	-0.52126	-0.601195	-0.981064	0.0253225	0.302179	0.801292	0.955558	-0.806228	-0.819652	-0.0550845	0.161245	0.604589	1.4171	-0.00884594	-0.684856
9.31946	-0.087405	-0.471505	1.74366	0.34813	-2.40093	-0.993689	0.967485	-2.01462	-0.0979298	-0.61905	1.38635	-0.261454	-0.165672	-0.0359165	1.20354	0.464617	1.72362	-0.688039	-0.779703	0.77283	0.2133	-0.829326	-1.65852	-1.04546	0.22338	0.843347	0.948431	-1.88529	0.814188	0.856409	-0.440412	-0.682368	-0.672707	-1.83558	1.96914	0.387232	2.52152	-0.337102	0.971061	0.161501	-0.981813	-0.168564	1.22178	-0.231546	-1.02217	0.485056	0.376182	-0.000431049	-0.261957
2.89796	-1.42449	-0.220434	-1.15392	1.43227	-0.851737	-1.36511	0.729494	-0.364033	-1.43662	-1.73376	-1.83892	2.19539	0.945995	1.01218	1.27134	-0.394399	-0.259346	0.813733	-2.84802	0.742164	0.316709	-0.213466	0.379989	-0.820476	0.821702	-0.116326	-1.4316	-0.140644	0.15779	-0.860088	0.594803	0.405357	1.19601	-0.433512	0.343391	1.42237	-0.465281	0.0335909	-1.05789	-0.216657	0.601379	2.09201	-1.2194	1.14901	-1.24975	1.48735	-0.0256612	1.00358	-0.722104
4.22338	2.02589	0.395498	1.3588e-05	-0.139676	0.351098	-3.83973	-2.49715	-1.50199	-1.27528	2.16497	2.30828	0.0356145	2.20033	-0.526971	0.860093	-0.643833	-2.34626	1.5251	0.449805	-0.0868063	-0.576052	-0.460825	-0.593294	-1.30224	-0.044789	-1.65053	-0.0774957	0.0942845	0.661675	1.62026	-0.330554	1.22139	1.07883	-0.526371	-0.0846979	-1.66736	-0.513556	-0.0271273	-0.567439	0.92495	2.53107	-0.26707	0.902662	1.42143	0.0232136	0.411073	1.87228	-0.645161	-1.54492
6.34085	3.06075	0.730722	2.11611	0.3826	1.23775	-2.50094	-2.35271	0.104868	-1.31172	-0.417173	1.14957	-0.367374	0.001232	0.452839	-0.335493	0.339633	-0.808729	1.34353	0.557865	0.436086	-0.518808	-2.00324	0.753943	1.06356	-0.845389	0.836933	-0.589619	0.0703561	-0.203017	-0.337	0.233409	-0.195894	-0.816867	-0.021559	1.32695	0.737429	-0.251182	-0.194493	-0.688474	-0.63215	-1.30046	-0.931832	0.55255	0.296194	-0.814393	0.546143	-1.4165	0.60353	-0.436009
9.34863	-0.838279	-4.7635	1.69163	0.169675	0.911388	0.484085	-0.524718	-0.381507	1.14233	1.28007	-0.596561	-1.22551	-1.12848	0.119925	0.551363	-1.19886	0.361046	-0.0377515	-0.156259	-0.332663	-0.119019	0.0250359	0.266572	-1.44295	1.08871	0.552277	-1.98759	-0.780423	0.307737	-0.763424	0.481362	0.974073	0.433033	-0.92783	-0.564167	-0.195606	-0.471383	-0.149875	0.880685	-0.085919	-0.0499464	0.353667	-0.210061	0.00189254	-0.971613	0.219144	0.271298	-0.613491	-0.710764
-5.08	-1.09678	1.39936	0.58189	1.17131	0.257684	-2.37279	-1.21357	-0.262437	0.915684	-1.38234	0.982257	-0.392616	-0.472275	0.517994	-0.84789	0.17109	-0.220766	0.053164	1.04654	-0.542988	1.10218	0.344436	0.445805	0.0837112	0.0321317	0.601156	-0.231477	0.0535611	0.747362	-1.10852	0.243119	0.726596	-1.17355	0.53188	-0.292043	0.45822	0.424905	0.225723	-0.938313	-0.137556	-0.113267	-1.10666	1.48406	-0.960732	-0.620063	0.0584072	1.15975	-0.257072	0.204692
-6.39039	-2.58241	1.53773	0.947284	4.78673	0.0193563	0.0852797	-1.80033	-1.26738	-0.771685	-0.163963	0.668601	-0.412808	-1.93999	-1.48456	1.56253	-0.252879	-2.31245	0.887008	0.676484	0.59001	0.907168	0.0338842	0.390141	0.115484	-1.96797	2.59684	-0.214555	-1.27826	-1.76157	1.6274	-0.857106	0.535559	0.821039	-0.505772	0.0699587	-0.959989	0.626036	1.13165	-0.13672	-0.392526	1.16998	-0.0555633	-0.0612976	0.544078	-0.794046	0.0527314	-0.262416	-2.16102	0.0515744
-4.58479	-0.712561	0.761175	2.69238	2.21969	-1.28465	-0.081969	-1.44437	-0.288275	0.872616	0.552144	0.752546	1.39567	-0.116455	-0.914981	-0.415828	-0.893484	1.72534	-0.0113298	1.01303	-0.203522	0.761123	-0.336251	-0.611559	1.43882	-0.818865	-0.349334	0.584696	-1.01211	0.224885	-1.18637	0.0477981	0.161413	0.485997	-0.255582	-0.665884	0.425019	0.51287	0.878283	0.0311795	0.921347	0.149927	-1.11068	-1.41604	0.660439	1.52612	0.335223	0.914751	0.0301165	-0.443256
14.7136	-0.552127	-0.442026	0.667722	0.833371	2.53735	0.710156	1.78498	-0.092558	-0.293375	-1.13669	-0.134034	2.89029	0.132218	0.337123	1.9553	-0.813106	-0.59966	-1.16079	0.150101	0.363825	2.47903	0.196981	0.114631	-0.668119	-1.54132	0.686117	-1.06142	1.88772	0.503782	-0.253145	-0.00592913	-0.0589296	-1.2372	1.32571	0.288487	-0.389501	0.136097	-0.336278	-0.785757	0.0625017	-1.52457	-1.44561	0.841064	0.849019	-1.30849	-0.516322	1.21003	0.869045	0.140015
13.5745	-4.04632	0.567649	0.847257	3.42008	-0.995421	-2.94613	1.28022	-1.11999	0.159654	1.5764	0.938351	-0.968067	-1.93259	0.560835	0.0326152	1.27173	-1.00466	-1.50138	-0.576757	0.115319	-0.122037	0.41374	-0.290165	0.630475	2.08702	-1.17022	-0.151097	-1.37286	1.48346	0.996472	-1.63868	-0.728442	-0.308245	1.55295	-0.922508	1.1105	0.0773872	-0.139972	-0.550791	0.503236	-0.473857	-0.491024	-0.0790117	-0.74506	-0.961481	1.05121	0.882218	0.598868	-2.08153
-1.65163	1.92507	-2.23963	-1.91278	-1.49433	0.257383	-0.0928964	3.18693	-1.78214	1.82512	-0.269111	1.28973	0.419856	0.337225	-0.62652	-1.05339	-3.22663	-0.366141	-0.666106	-1.59916	-1.4289	2.11656	-1.83458	0.695411	-0.900405	-1.58986	1.00613	1.24437	0.0817326	-0.111875	-0.592233	0.205274	-1.51138	-0.165035	-1.9685	1.51346	1.18868	-0.695584	-1.88055	-0.242453	1.31872	-0.756265	0.257484	0.574494	0.108646	1.96776	0.105211	0.344901	-0.483931	0.399899
14.0636	-0.276175	0.62321	0.523688	1.60354	0.466319	1.07385	-0.298377	-0.340478	-0.433216	2.23651	-1.09048	0.280379	-0.71828	0.968268	-0.361566	0.0332987	-0.523991	0.282563	-1.76511	-0.708588	0.393701	-0.0036461	0.234008	-0.85713	-0.934032	0.16243	-0.50406	0.110278	-0.660147	1.58374	-0.310954	-1.06662	1.72417	-0.224633	-0.623577	-1.00369	-0.270063	0.34323	0.301134	-0.318024	-0.463018	1.07851	-0.391372	0.962711	0.295057	1.0373	0.517197	-0.303425	-1.15893
7.96658	-1.11298	1.29426	-2.12059	-2.88746	1.30606	0.482693	-0.90258	2.7572	-0.81818	-1.39758	-0.353594	0.255934	0.827034	0.699624	0.501474	-0.60996	-1.56992	-0.312261	-0.351793	0.515786	-0.408533	-0.546409	-0.322386	-0.962458	-0.211493	0.79206	1.08527	-0.324714	0.247261	1.24146	-0.80866	-0.0783972	-1.50762	0.0426116	-1.39237	-0.054414	0.216994	-0.0336307	-0.292569	-0.207844	0.79059	0.553301	0.655662	0.147527	-0.704235	-0.817952	0.503033	1.04291	-1.01638
2.6239	-1.3983	1.467	0.748019	1.15087	1.75002	0.671339	1.47281	0.924861	-0.157835	-1.93965	-0.398666	-0.564683	-0.486631	0.62516	1.23222	1.50543	0.296268	-0.691615	0.115062	1.02752	-1.68449	-0.941869	1.08913	-1.00861	-0.912215	-0.51723	1.66149	-0.573789	1.29321	-1.14649	-0.616393	1.90555	-2.04357	0.472433	-1.58558	-0.459853	-1.33033	-0.291399	-0.750057	-1.14767	-1.02057	0.967542	0.719501	-0.625101	-0.718949	-1.63894	0.354842	-0.323773	0.301648
4.94834	-0.163568	0.802438	1.2383	-0.358041	0.812307	-1.64911	-0.371304	1.11434	0.542319	-1.7696	0.625888	1.15813	0.033247	0.85257	-0.412913	0.345366	1.24027	-2.36557	-0.746109	-0.786799	-0.936837	0.621382	-1.17279	0.473439	-0.77308	0.672274	1.49956	-0.615337	0.367963	0.661399	-0.50211	0.252797	-0.225175	-0.450281	-0.153035	-1.34974	-0.915199	0.639315	1.4125	0.646465	-0.289874	1.08347	-0.916897	0.195015	-0.981989	1.66074	-1.59931	-1.21598	-0.020977
11.762	2.01086	-1.12207	1.69291	3.48224	0.533487	-0.599001	-0.566145	0.641276	0.525732	0.767494	-0.354865	0.289993	-3.15987	0.398996	0.336557	-0.175436	-0.538886	-0.124636	2.84483	0.719633	-0.234933	0.185185	0.316854	-0.200999	0.953695	0.44377	0.885979	-0.0053822	0.171024	1.24626	0.420658	0.249899	-1.35869	-0.299348	1.51653	1.3163	-0.255732	0.849418	0.34801	0.0601157	-0.60805	0.00107451	0.300753	0.109895	-0.606972	0.251178	-0.412286	-0.232185	-0.452424
4.06993	0.487114	1.63938	2.03028	-0.890432	-1.46898	2.046	-0.18231	-1.20327	-1.16286	0.580499	1.17404	0.65073	1.45494	2.101	-0.485368	1.68186	1.03805	0.152087	-0.696091	-0.619664	0.0111094	-0.165927	0.904172	0.898749	0.419688	0.684588	-0.138932	-0.0482483	0.0553159	0.967439	0.437446	1.23447	-0.72243	0.244093	-0.327435	-0.0496377	1.11374	-2.16411	0.533388	-0.514552	0.222319	1.09321	0.567041	0.574715	-1.30412	0.105392	1.00011	-1.30612	0.164676
2.1138	0.873781	1.56091	0.67787	0.553445	-0.531548	-0.402648	2.15316	0.165992	-1.17015	0.548096	-0.0894646	0.937399	-1.05983	-0.652334	0.157325	-0.390115	-0.63115	-0.79273	0.0872417	-0.988245	-0.248934	-0.401227	-1.23355	-0.382135	0.231428	0.427699	1.74106	-1.03965	-1.63674	-1.30886	-0.696748	1.36237	0.662793	0.11855	0.154571	1.34708	-1.10348	0.0057125	-0.0677719	-0.45688	-1.10697	0.747871	0.00198867	-0.134309	-0.38096	-0.586362	-0.468028	-0.521678	-0.977006
6.98616	-2.23807	-0.306611	-1.42392	-0.796432	0.570552	-0.923503	-1.88028	0.323079	-1.55921	-2.08852	0.27515	1.82779	-0.199202	-1.12818	1.0748	-0.265105	0.0557915	0.51183	0.207803	-1.06996	-0.497425	0.694896	-0.146785	0.390971	-0.638474	-0.576303	1.14131	0.601443	0.00959634	1.13901	-0.63657	-0.874502	-0.19368	-1.42259	-0.582102	-0.430489	-0.168767	-0.06212	0.0912171	0.971229	1.27477	1.30772	-0.00962777	-0.525276	0.680252	-0.315311	-1.3427	-0.340203	1.26458
-3.42314	-2.40955	1.013	1.64913	-0.60728	-0.977769	0.0564824	-0.650324	1.15465	-0.8358	-0.827554	-0.450874	-0.183001	0.384342	-1.99081	-0.408481	0.37053	-1.93607	0.237579	0.322225	-0.890962	0.0085787	0.751343	-0.751977	1.86709	0.121921	0.164718	-0.155297	1.12404	-0.41972	-0.491199	-2.36607	0.0960818	-0.957193	-0.0351195	-0.185629	-0.88891	0.0256102	-0.636163	0.983148	1.05597	-1.01318	1.44711	0.401301	0.435338	0.907559	0.177323	0.132915	0.0846493	-0.426618
7.24169	4.20558	-0.631505	1.11252	-0.488813	-1.25224	0.309778	-0.93091	-0.810804	0.726726	0.489768	1.44411	-1.0751	-0.64291	0.576825	0.251159	0.763546	-1.3348	0.792209	0.53122	0.134343	-0.653111	-0.372727	1.9341	-2.06743	0.366663	0.458067	-1.69637	-0.208366	-1.40792	0.225198	0.327311	-0.473859	-2.08699	-0.657232	0.45732	-0.555501	1.08371	0.659309	0.509142	-1.12937	0.476006	-0.024045	-1.12168	-0.205458	0.856133	0.783855	0.105032	-0.201619	-0.267856
-1.91995	-0.284003	0.698441	0.617997	0.680076	0.152047	-0.126053	0.465003	0.124008	-1.27436	-1.47048	0.572772	-2.45489	0.885525	-0.533365	-0.912076	0.276084	-1.31724	0.621944	-0.696327	-0.945598	0.0343934	-0.579611	0.0647844	-0.400383	0.150588	-0.273059	-1.50545	-1.68013	-0.983502	0.535424	-0.985346	-0.625496	0.910809	0.0888385	0.802621	-0.860458	1.45676	-0.512403	-1.00819	0.343535	0.0933243	0.19278	0.553188	0.217355	-0.405903	-0.0897583	0.924258	-0.128041	1.16407
6.09909	-0.421341	2.67598	1.34043	-1.03428	0.362678	-0.306883	2.31884	-1.16589	0.0256834	-0.210264	0.799203	-0.707416	-0.694067	0.00583206	2.01063	-0.32023	-0.259823	0.162383	-2.72671	1.43068	-1.41048	0.718478	-0.883514	-0.0502879	0.157444	0.164788	-0.607697	1.71524	-0.265299	-0.143893	-0.474646	-0.123257	0.182404	-0.150359	-0.414721	-0.471229	-0.27729	0.915991	-0.913559	0.532186	0.47348	2.17544	-0.569799	1.42952	0.657273	0.479114	-1.90055	0.596028	-0.872119
5.43642	-0.511066	-1.49034	-0.120863	-1.89679	0.803407	-1.48944	-1.239	2.84928	-0.0548622	-1.83299	1.50788	-1.02782	-0.868801	0.442879	-0.854426	-1.05724	-0.850922	-0.887846	-0.961714	0.951867	0.403494	1.00226	-0.185249	0.173731	-0.198494	-1.54029	1.17165	-0.368847	1.11662	-1.06043	0.267218	-1.27151	-0.584605	-1.4707	0.169431	-1.04384	1.47588	-0.400554	0.182097	1.06168	-0.639143	-0.716309	0.251941	0.481724	-0.709755	1.40497	0.0420029	0.000424188	0.594932
-2.19523	-1.85893	-0.870287	1.33267	-1.5553	-1.77792	-1.07965	-0.350277	-0.982654	0.0165645	-0.928871	0.498671	0.569798	-2.8909	0.276677	0.992802	0.993028	1.27265	-0.542114	-0.19551	0.473322	0.424618	0.581565	0.526076	-0.737219	0.494152	-0.471328	0.0248408	-0.24092	0.392691	-0.0386748	0.431819	0.449479	0.0611346	-0.691119	-0.273999	0.480568	-0.149806	-0.732449	1.84966	0.476233	0.00929704	0.0473604	0.238863	0.287133	-0.000295314	-1.024	-1.35646	0.478272	-1.07675
3.60739	-3.56667	1.28657	0.51689	2.71841	-0.995455	0.73898	-2.47245	-0.643892	-2.55742	-0.55956	-0.977054	0.0174827	-0.797145	1.17983	1.27769	0.0518121	-0.799156	0.629903	-0.597982	0.540456	-0.932268	-0.397054	0.60911	0.627082	0.950899	-3.70315	0.401034	-1.07706	-0.78068	0.652374	-0.739944	-0.781923	-0.213894	-0.466007	-0.587578	-0.0482604	0.127857	-0.669892	-0.261114	-0.458207	-0.778059	-1.49922	0.240654	-1.13849	0.61775	-0.871492	0.198909	0.267575	-2.04566
5.48935	-3.54083	-0.751268	2.16546	1.37153	1.18738	0.052629	-0.198723	-0.365895	-0.294344	1.03319	1.02365	1.46678	-0.683274	-1.87949	-0.824644	0.251395	0.578296	-0.613838	0.310868	-0.417145	1.45907	0.443392	-0.966494	-0.588993	-0.979705	-0.416224	-0.940068	-1.215	0.557655	0.920636	0.635856	0.543912	0.574449	0.486407	-1.057	1.15917	0.789241	0.554875	1.20913	-0.536764	0.482771	-1.05475	0.501257	-1.70833	-0.849713	1.89643	-1.51601	0.65488	0.194587
6.7929	-0.748338	-1.1636	1.60177	1.22264	1.44924	1.44052	0.0742324	-0.412332	-0.132423	-0.660467	-0.320263	-0.303988	-1.01199	1.09897	0.611568	2.04678	-0.211133	1.22997	0.970451	1.43758	-0.079981	0.058693	-0.050716	1.779	1.57146	1.20162	-0.283489	-0.108255	0.238286	0.0881291	-0.0183568	-0.850655	1.50564	-0.480772	1.52305	-0.162078	1.13956	-0.659048	-1.39891	1.37076	-0.493452	-1.33619	0.73948	0.137327	0.138321	-1.09324	0.347302	-0.766041	0.535513
11.8053	0.960529	-0.219882	-1.17291	0.524878	-0.603225	-1.70273	1.6073	0.241466	1.4449	0.713573	0.323072	-0.0835233	1.06581	1.37819	-0.976852	1.0824	-1.1623	0.228817	1.34036	-0.271345	-0.803686	1.51034	0.212252	-0.283873	-0.635791	-0.445932	1.70332	-0.289665	-0.709977	1.13697	-0.756743	0.368958	0.377511	-0.872204	-0.241151	-0.908216	0.646996	0.867189	-1.66914	0.27368	-0.965643	0.307434	0.579743	0.314273	-0.523161	-0.32145	-1.40322	1.43395	-0.127291
9.71349	-0.526806	-1.42232	1.42029	1.09227	0.650986	0.536678	-1.26378	1.37123	-2.51724	-0.514883	0.966803	-0.0532301	2.42984	-0.141766	0.876749	0.362981	-0.98007	1.04324	-0.445325	-0.373498	1.31632	-1.20692	1.43419	-1.78326	-1.19285	-0.133911	-0.950979	-0.503021	-0.139305	0.0396088	-0.345372	0.415013	-0.388637	-0.492002	0.451325	-0.305928	-0.917903	-0.938718	0.871779	-0.851816	0.382762	-1.30522	-0.050007	0.257074	-1.16574	-0.0732235	0.0825555	-0.646353	0.724968
3.93568	2.56457	1.26105	2.4399	-1.44993	-1.24753	-0.162603	-0.170603	0.860042	1.62667	0.701057	1.53628	-1.43695	-0.230143	-1.28131	0.680828	-0.320937	0.576079	-0.306705	-1.4858	1.59675	0.274816	0.48902	-0.969753	-0.649109	1.51642	0.633267	-0.0452042	-0.0780051	-0.357368	-0.695887	-0.235574	0.366682	1.31455	0.260324	1.64021	0.271588	0.463535	0.326553	1.11522	1.15602	2.13913	0.0685747	-0.201456	-0.931133	-1.2232	0.0824418	-1.28072	-0.838832	1.31897
6.44719	-0.342874	2.1375	0.188339	-0.633099	0.0801741	0.634295	0.694647	-0.561873	-1.20331	-0.491718	0.0150113	0.262618	-1.73414	-1.05652	1.15399	-1.08448	-0.58747	-1.18883	1.00905	-0.235672	-0.487292	0.614177	-0.13702	0.186703	1.25025	-1.26062	-0.755659	-0.333649	0.27078	0.248183	-0.222402	-0.082058	-0.744058	-0.857731	-0.262801	0.600341	0.882306	-0.839264	1.23068	1.39008	0.706568	0.31864	-0.644167	-0.0958666	0.830355	1.07724	0.0783208	0.502197	0.332725
-4.56309	-2.98077	-0.890942	1.9021	-0.32969	-0.612819	-1.26464	-1.8651	-1.10938	-0.621633	-0.861353	0.10123	1.18836	0.637919	-2.75645	0.673446	0.245436	0.276309	-0.613237	0.171042	0.304342	-1.54111	0.0898602	-0.278014	-0.22691	-0.36293	-0.923048	-0.46403	1.72285	0.0159813	-1.19029	-0.471938	2.33894	-0.516313	0.304204	-0.204552	0.605041	0.171712	0.701399	-1.58755	0.334409	-0.769833	-0.61897	0.269131	0.0624121	-0.174369	-0.184516	-0.359545	0.278641	0.0342825
8.44031	0.128721	-1.81128	-0.279381	0.794959	0.697991	1.52758	-1.11715	0.416212	-4.03847	1.96753	-0.187983	-1.4028	-1.38938	0.987444	0.486371	0.0638678	-0.144365	-0.0141007	1.84014	-1.60618	-1.93254	-1.48494	0.356602	-0.688548	-0.451318	0.0798343	0.262329	-0.144815	-1.28244	-0.949374	-0.5919	-2.51654	0.70344	-2.02111	0.252728	-0.0783446	0.300347	0.635336	-2.03766	2.01662	-0.00430628	-0.826062	0.489912	-0.569702	-0.0441953	-0.316506	-1.0326	0.1755	0.509251
7.27829	0.937417	-1.55235	1.24607	0.144595	-0.835166	-0.341442	2.43485	-0.136695	1.01409	0.858308	-1.26334	-0.0172711	-1.02348	-0.388052	-1.00995	-1.25234	0.268492	0.250068	0.365344	-0.860847	-0.85758	-1.23988	-1.04024	1.7858	0.588183	-0.760264	-0.606994	0.452977	0.142097	-0.385953	-0.464007	-0.258655	-0.597029	-0.508381	0.481612	-0.991959	-0.576053	0.929583	0.0773202	0.297536	0.479602	-0.660243	-0.687989	-0.166237	0.294461	-0.572968	-0.0186449	-0.0176495	-0.695044
-3.05267	1.02468	0.404267	1.87995	0.367529	-1.168	1.3206	-1.03081	0.356252	-0.627975	1.26977	-1.82008	0.861975	-0.00901838	-1.18956	1.36301	-0.707083	0.300194	2.21252	-1.23025	-0.457279	1.72502	1.58079	1.308	0.477291	0.316896	0.603249	2.65392	0.254711	0.361485	-0.545495	0.0734628	-0.00414276	-0.042549	-1.12147	-1.48316	0.700216	-0.895022	-0.464837	1.22063	-0.251447	1.0035	0.852508	0.740893	1.16514	0.484421	-0.570347	-0.0953586	1.02039	-0.0299891
1.57362	0.496866	-0.171349	-1.0242	-3.10869	0.622176	-0.891756	-0.147385	-0.642379	-2.24314	-1.82926	0.890475	-0.043527	0.360064	3.02199	0.424329	-0.981154	0.443317	0.740588	-0.140219	1.6889	0.573468	-0.13149	-1.101	0.468747	0.899295	0.465545	-1.06536	0.243976	0.349041	1.14646	-0.082647	-1.31189	0.380808	-1.75306	1.17943	-0.142241	0.338598	-0.109432	1.13799	2.15608	0.25322	-0.236349	-0.128664	0.165309	0.886926	0.0651999	1.08007	-0.289207	-0.470539
6.88902	-0.795459	-1.77009	0.566327	-2.70478	2.3499	-1.55988	0.155457	-0.0597577	-0.292627	-1.05742	0.466654	1.74086	2.08374	0.80948	-1.58923	1.55177	-1.24763	-0.352685	-0.258596	-0.727972	-2.06367	-3.43372	-0.918572	0.648444	0.0993282	-0.598509	-0.088238	0.389363	-1.1037	-1.54859	-0.95799	-0.3183	-0.295194	-0.553367	1.12599	-0.480703	-0.591342	-0.885877	0.333354	0.880119	0.275084	0.907617	0.64808	-0.279055	-1.07358	-0.243745	-0.220114	0.707628	-0.474773
4.5298	-1.77968	-0.0016507	-0.86103	0.207545	-1.23959	-2.49035	-2.20222	-0.936266	-0.185386	0.500263	-0.690887	0.454627	-2.1556	0.6369	1.55764	-1.40559	-0.252232	-0.449709	-1.60463	-0.516926	-1.81294	-1.09044	0.249974	-0.518337	0.509573	-0.22788	-0.488699	0.340141	2.26779	0.962866	1.07719	-0.43672	0.989206	-0.5425	0.460092	0.129117	0.425714	0.642354	1.20265	-1.51585	1.46794	-0.934099	-0.0576955	-1.35939	1.40458	-1.14327	-1.49621	0.662337	1.03685
5.40793	-0.163708	1.11888	0.866881	0.371845	-0.0467925	-0.142256	0.377635	-0.281053	1.06239	0.0731128	0.238368	-0.601582	0.463846	1.04925	1.24418	0.35468	0.724774	0.455593	1.22617	-0.263504	-0.39919	0.772093	0.828577	0.322673	1.24734	-0.0466983	-1.82754	-1.59579	0.720258	0.00302552	0.284881	0.517279	0.249185	-0.439337	0.0563081	-1.45523	0.697264	0.67176	1.17693	-0.234782	0.405972	0.864406	-0.165569	-1.26199	-0.730625	0.147659	-0.705412	-2.27826	0.162234
3.13182	-0.752918	1.79307	1.89682	1.08503	-0.559835	1.77557	0.791272	0.802837	0.376265	2.67558	1.37284	-1.20124	0.183267	-1.58948	-0.59565	0.915417	-0.72036	0.573506	-0.395967	-0.0277673	2.15457	-0.622266	0.192594	0.933034	-0.539195	0.330902	-0.939798	-0.128361	-0.91506	0.123682	0.661513	0.230184	-0.584849	0.144028	-0.777101	0.378306	0.411664	-0.553544	-0.197458	1.18298	0.441059	-0.423024	0.852938	-0.42857	0.493307	0.590784	-0.377764	0.233434	-0.316777
3.27011	1.84777	1.6465	2.80784	-0.912899	-0.514795	-1.28562	-0.387686	-0.351452	0.00791726	0.855689	-0.571728	-1.78457	1.13808	-0.26269	-2.11036	1.27709	-1.59775	-0.108082	-0.189699	-0.744522	-0.266405	0.433545	0.982744	1.05057	0.0158547	0.908142	0.37767	-0.0670838	-0.880429	0.204714	0.0383787	-0.848178	1.04473	-0.317733	-0.758791	0.780007	-1.07402	-0.63305	-1.13069	0.124048	-0.301254	0.099786	-0.156325	0.117025	-0.670562	0.0106293	0.118507	0.218001	1.35665
9.69395	-0.107092	-0.398881	0.741981	4.69426	-1.80819	0.64821	-0.467165	1.29344	1.22385	0.0533312	1.60672	1.25613	1.01038	-0.193782	1.69092	-2.4869	-1.21132	-0.65538	0.264839	-0.213392	0.608806	0.206779	-0.213679	-1.91178	0.360273	-0.132219	-2.69619	-0.952186	0.118994	-1.3043	-2.21076	1.01893	1.02532	0.757805	-0.731634	0.461474	-0.929276	1.11006	0.132844	0.524121	-0.663578	-0.808652	0.0583726	2.13071	-1.26374	0.297817	1.03293	1.17832	-1.72421
4.22415	-0.983549	0.966498	-0.146849	-0.0744433	-2.68896	1.0172	2.87126	-0.130429	-1.79436	-0.869578	-0.81883	1.81857	2.32533	0.547406	1.85193	-0.316501	0.294663	-0.547244	-0.158131	0.598435	-0.655182	-0.00632399	-0.733635	-0.264001	0.0664276	-0.87859	-0.955172	0.453576	-0.0872855	-0.94506	0.456567	-0.885461	0.0970246	0.922762	-0.640228	-0.228141	-0.205515	-0.0891599	0.492985	-0.651305	-0.110626	0.0756214	0.81276	0.51104	-0.201183	1.40531	-0.114524	-0.928731	0.53828
-9.38629	-2.7037	2.23282	3.87042	1.40187	1.84176	-0.395614	-0.660744	-1.26015	-0.745941	0.264515	-1.24964	-0.956086	0.667228	-1.15339	0.453247	-0.444442	0.252455	-0.219828	-1.40758	0.117727	0.0674895	0.00660091	-0.576562	0.709263	1.19312	0.515452	-0.740745	-0.776673	-0.791534	-0.981789	-0.369903	0.450649	0.524213	-0.315483	0.554217	-1.60282	1.61326	-0.382439	-1.2484	0.0400814	-0.0325968	0.188804	-0.568134	-0.590792	-0.428683	-0.237723	0.340223	-0.380887	0.147954
7.45463	-2.42322	-0.925792	1.11453	1.0727	1.52838	-1.49126	-0.999423	0.0215588	-1.35067	0.815151	-1.21839	0.211219	1.48419	-0.28113	-0.245766	0.453398	-0.410048	1.61074	-1.62483	0.774713	-0.271723	0.58801	0.405008	-0.279031	-0.0995928	-0.413227	-0.479342	-0.212586	0.565289	-0.324503	-0.804077	0.138068	1.08988	-1.27635	0.602964	0.737087	0.912592	1.0007	0.104027	0.889102	0.363734	-0.216075	0.716902	-0.616824	1.52964	1.72802	-0.460841	0.505434	-0.976121
-2.85219	-3.05792	0.790147	2.02113	1.31401	0.237496	0.454804	-0.893183	1.48388	0.218784	-0.129254	-1.27702	-0.941789	0.491795	-1.38501	0.438294	-0.425383	-0.651249	-1.90205	-0.4339	0.712908	0.461297	-0.806449	-0.170045	-0.220998	-0.577549	0.298817	0.722621	0.300869	-0.788782	0.0403222	-0.878715	1.61438	0.638429	0.353473	0.517081	0.178675	0.247041	0.376907	1.12176	0.317568	-0.221461	-1.34756	0.521029	-1.22289	-0.893248	-0.879156	-0.201819	-0.00137814	-0.512687
0.923904	1.30676	1.13921	-2.32263	-0.219318	-1.73778	0.991477	-2.11478	-2.86348	-1.91157	-0.704606	0.401882	0.671151	-0.644699	1.15275	-2.86115	-1.99484	1.69933	0.154989	0.527738	-1.39399	-0.120694	-2.30371	-1.05333	0.628404	1.47033	1.89581	-0.798457	1.14273	0.503259	-0.460954	-0.261386	-0.460779	0.340613	-1.52079	0.650055	-1.82464	-0.103714	-0.175801	0.151727	-0.623185	-0.745771	-0.442552	0.548321	2.14168	0.499933	-0.267942	-0.807639	-2.06092	-0.0902935
11.3647	2.49392	-1.62044	0.15268	-1.69264	1.79945	0.625362	-0.872311	-1.1742	-1.7757	1.2822	0.653215	1.32583	-0.0241759	-0.695762	0.212886	-1.21194	2.04628	0.015585	-1.43382	2.38103	-1.71798	-1.39652	0.600407	0.481966	-1.29465	0.0577777	-1.54236	0.932013	1.20399	-0.367502	-0.760975	-0.450934	0.395617	1.04633	0.215465	-0.453586	0.844545	-0.896536	0.0913564	0.83785	-0.702573	-1.62934	1.20823	0.178578	0.378724	-1.20121	0.271746	0.267853	-0.591008
1.82209	0.0814296	0.949075	0.909106	-0.880597	1.48132	-0.181789	0.0181261	0.793839	-0.643765	-0.218386	0.263639	-1.08054	0.386142	0.50081	-1.49802	1.77323	1.14751	-1.29133	0.399941	-0.462781	-0.98171	-1.32277	-0.614393	-0.0767191	0.979791	1.11685	0.0823714	0.14486	0.117936	-0.625339	1.94474	1.05677	-0.160818	1.28943	1.4511	-1.25947	0.115287	0.650574	-0.130632	-0.389485	0.665786	-0.687119	-0.689554	1.48252	0.0534454	0.0924773	-0.04155	0.209293	0.00781141
8.22881	2.60656	0.0177777	-0.135352	2.03221	-0.883545	-1.37222	2.66814	-0.537997	-0.245999	-0.598127	1.73847	0.0883172	-0.156348	0.0178979	-0.930219	0.375021	0.146108	2.82694	0.531946	-0.75486	1.73599	0.524103	0.374194	1.31667	-2.14853	-1.36456	-0.585419	-0.302067	-1.49584	-0.405322	-0.157748	0.706991	0.105861	-0.259424	-1.16463	-0.676183	1.95698	0.500744	0.360856	1.03366	0.334767	0.534615	-1.45358	1.32127	-1.86141	-1.74735	-0.463934	-0.251676	-0.108229
2.16983	-1.47128	-0.0680921	1.12333	0.71217	0.765254	-1.43014	-0.214514	-1.51965	-0.709797	-0.665303	0.839022	0.19727	-0.98259	-0.243103	-0.812947	0.480721	-1.22663	-0.328234	-0.647856	0.300846	-0.0552357	-0.445113	-0.0671936	-0.298318	-1.11045	-1.11558	-1.62607	0.381022	-0.318991	0.569624	0.0543693	-1.09428	-0.773793	0.707961	-0.442423	0.960782	-0.17646	0.0899061	-1.68775	-1.48442	0.730124	1.09113	-1.08137	-0.794033	0.394277	0.0712934	-0.916806	0.967683	-0.549333
5.98508	-0.345038	-3.38177	-0.61612	0.218252	3.43994	-1.89028	0.772712	-0.764718	-0.349115	-0.478094	-1.21313	1.91348	-0.769829	0.166049	0.741338	0.956441	0.247955	-0.679536	-0.458606	-0.541305	2.16473	-0.487727	-1.1977	0.315645	-0.65138	1.42728	-1.82506	0.248444	-0.440657	1.29796	0.118121	0.464326	1.26274	0.851615	0.149805	-1.32833	-0.81513	-0.0177412	-1.44733	0.172245	-1.36548	1.00622	-0.414786	-0.370698	-0.126631	0.619561	0.243743	-1.07117	0.735917
4.72898	-1.34938	-0.619035	1.27326	-0.768762	0.690383	-2.00441	1.28296	1.46011	-1.31209	0.445703	0.0308625	-2.54879	0.00655453	-1.47275	0.23121	-2.29761	0.178197	-0.760613	-1.23867	1.35238	-0.223684	1.46509	-0.634419	-0.00503547	1.06153	-0.0953224	-0.542089	0.608706	0.899061	0.925362	-0.653672	-0.457473	0.663507	-0.82686	0.848638	0.138493	-0.430027	0.430522	1.43219	1.41251	-0.00915605	0.217567	-0.182128	0.423488	0.904036	-1.05341	-1.53434	0.543774	-0.879454
13.585	2.84055	-1.36641	-0.0110114	-0.375888	4.24997	-0.396537	-0.590681	-0.93522	1.43734	0.701642	1.99398	-1.5999	-0.553641	0.428379	-0.0719185	2.19984	-0.345234	1.33206	-0.181602	-0.224085	0.657971	0.378115	1.65589	-0.833217	-0.989426	-1.11933	-1.22748	0.592243	-0.327841	0.306163	0.527866	-0.875922	0.445172	0.256601	-0.420638	-1.58133	-1.66264	-0.0903941	1.65773	-0.699496	-0.978198	-0.0405607	-0.76207	0.709874	-0.207834	-1.25356	1.77039	1.56703	0.000932909
10.1113	0.146021	-1.28856	-0.0514444	2.4935	-0.162934	1.22039	0.767311	0.820144	3.17367	-1.20818	1.82445	0.178671	1.34959	0.820776	0.594125	1.20545	0.361053	-0.231102	-0.673318	-0.655956	-0.442835	-1.61232	0.402941	0.393035	0.00582883	0.423498	-0.135864	1.79444	-0.882236	1.45229	0.388971	-0.744962	0.0572118	1.2896	-1.14773	0.331388	-0.0140493	1.42707	-0.723064	-0.429511	-0.73841	1.08902	0.530091	-0.936018	0.390032	-0.864603	0.475973	0.187046	-0.504388
7.00844	-0.232752	0.491475	0.0471987	-1.75031	-3.11146	-1.33274	-0.379937	-1.09694	0.281851	0.500554	-0.213982	-1.60926	-0.320462	1.3106	0.260606	0.198964	-0.848295	-0.844674	0.69236	-0.761663	-1.13416	-0.100703	0.614599	0.360239	-1.02857	-0.0629054	-0.360046	-0.804455	0.811472	0.952444	-0.112037	1.64283	0.868934	1.14583	-0.214291	1.19794	-0.747621	-0.882129	1.30905	0.921321	0.932104	0.71128	-1.09721	-1.28278	0.868506	0.890287	0.71055	-0.090589	0.767094
12.4597	2.8553	-2.47585	1.86108	0.608389	0.836085	0.224793	2.53004	-0.0737036	0.356192	2.14859	0.283916	1.88378	0.391194	0.583182	-0.182574	0.545969	1.41714	0.996472	1.3609	-1.10506	-0.403924	1.02158	0.0992605	0.291253	1.0452	-0.732948	-1.6696	0.270334	1.63655	-0.227868	0.43894	2.00678	-0.0921097	-0.0381457	-0.968741	-1.41208	0.91554	-0.762722	-0.0928229	0.295534	-1.77371	-1.45483	1.59588	0.276319	0.320178	1.03626	-0.197583	0.305965	-0.411865
6.30227	-4.27685	1.40332	-2.26698	-0.203605	1.39727	-0.587475	-0.790843	-2.32788	0.871694	-0.799637	-0.416489	-0.430839	0.754573	1.76086	-1.46207	-0.4303	-0.287879	1.1436	-0.360146	0.108497	-1.01469	1.03541	-0.483799	1.15568	1.53762	1.67713	0.494162	0.271676	0.716186	-1.98688	-0.232639	-0.795649	1.18979	-1.41436	0.0513664	0.280185	0.025556	0.402178	-1.61359	0.984423	-1.29615	-1.73779	0.574679	-1.61272	-0.921133	0.659567	0.214776	-0.230156	0.479293
0.55415	-2.21612	-2.19491	2.53633	0.762602	0.451535	0.198189	0.980072	0.985768	0.958774	-0.465836	-1.88854	1.80943	-0.285356	-1.85209	-0.555819	-0.87498	0.760789	-0.454512	0.752913	1.54036	0.649583	-0.0991706	0.579608	2.49446	0.441188	-1.09641	0.193766	-0.071618	-1.28267	0.49677	-0.26495	-0.356958	0.807093	0.545046	0.876878	0.169533	0.370065	0.860142	0.0612518	0.215501	0.706036	0.854307	0.888871	0.196935	0.464538	0.392032	1.61292	0.554398	-0.698527
-1.54672	-3.18535	-1.76935	2.00451	0.394505	-4.79164	0.608846	-1.86414	0.80543	-0.0899048	-0.311421	0.877791	-1.39321	1.95385	0.822775	0.524026	-0.39692	-1.76307	0.174397	1.37856	-0.665693	0.178826	-1.82178	-0.00488229	-0.655786	1.0542	-0.800792	-0.518564	0.0495512	0.457139	1.09523	0.648314	0.328887	-0.0899416	0.787824	0.623543	-0.905816	-0.461525	0.247487	1.25037	0.34666	-0.163856	-0.425235	-0.664612	0.973031	-0.569872	-0.284079	-0.214848	-0.592906	-0.866329
15.2383	-1.03949	-0.876919	2.81318	3.29431	2.24225	-0.600213	-0.801682	-0.664232	-1.31341	0.996625	-1.74568	0.449481	-0.621913	-0.872806	0.957462	-0.588441	0.0919087	-0.572861	0.914352	-0.362751	0.295897	-0.37101	1.26454	-1.10166	1.28853	-0.152114	1.10738	0.761077	-1.03422	-0.00920303	2.10703	-0.372152	-1.12062	0.627201	-0.942062	-0.195535	0.108692	-1.62177	-0.152714	-0.516806	-0.367384	0.25534	-0.224799	0.0457723	-0.810352	1.58292	0.889207	0.18801	0.0342756
-3.55002	-1.31628	2.18936	3.5062	1.20923	1.00074	0.307106	-0.437339	-0.762998	0.281287	0.0681334	0.0286563	1.34896	0.159355	0.0117859	0.532073	0.15843	1.4264	0.131361	0.99362	0.111854	0.596662	0.777531	-0.293635	0.646099	-0.314774	0.298406	0.796609	-0.292463	1.07939	0.922191	-0.178157	1.26618	0.312474	-1.05013	1.5264	0.735441	-0.818432	-0.753403	-0.791019	0.202177	0.837221	-0.0125311	-0.821113	0.291548	0.192465	0.225833	0.125416	-1.49226	2.09125
0.506844	1.23729	0.63689	1.97866	2.13829	-2.17178	1.28229	-1.76432	1.5546	1.14019	0.586228	-2.92882	-1.38005	-0.204795	2.04881	-1.21671	-2.30775	0.189299	-0.221449	-1.2451	1.06205	1.13085	-2.61909	-0.926284	0.980918	-1.47146	-0.881134	0.678685	1.09252	-0.746164	-1.00439	0.136508	1.58564	-2.04222	0.353034	-0.0996461	1.30722	0.276569	-1.71456	-0.935532	-1.14297	0.133216	0.806756	0.783911	1.68819	0.099747	-0.444731	-0.352459	-0.586359	0.680718
3.22729	-2.25378	1.8556	0.604039	0.063006	-0.157642	-2.37167	1.39163	1.22044	0.998753	1.05635	1.36594	-0.927146	0.307628	0.0770153	-0.653745	-0.0316409	0.101643	0.54582	0.0408049	0.520762	1.27731	1.06619	0.590805	0.0964688	-0.424397	1.05823	0.371413	0.951782	-0.727354	-0.436966	-0.554432	0.735027	0.801611	-0.049593	0.243292	0.312208	0.447064	-0.255691	-1.2783	-0.942459	-0.423805	0.919641	0.0775368	-1.01067	-1.62969	0.711926	0.0320627	-0.0485151	0.804873
5.36763	-3.22337	0.640062	1.25965	2.97929	1.07446	-3.09856	1.12278	-0.636776	-0.990223	-0.332503	-2.6127	-0.797105	0.206558	-0.803622	-0.279857	1.49434	1.55337	0.251228	0.226542	0.820139	1.46578	0.637455	0.252005	-0.503046	-0.62492	-0.5363	-0.951205	0.19705	-0.60779	0.573044	0.645861	-0.371097	-0.219231	0.43478	0.214154	-0.513231	0.854775	-0.27723	1.31381	0.113473	-1.40439	-0.329831	-0.196398	-0.123814	-0.0454825	-1.17134	0.201491	-1.82709	0.043349
3.89583	5.19851	-1.89003	-0.726235	0.658405	-0.740702	-3.84455	0.386544	0.460353	-0.654456	-0.696968	1.08858	-1.87656	-0.954116	2.14884	-2.48682	0.180946	-0.490369	-0.667747	1.37624	-1.22201	0.858073	1.32466	-0.539701	-1.98439	0.937972	-0.00120187	1.5027	0.809134	-0.181893	-0.306978	-0.275146	-0.885663	-0.345437	0.427972	-0.559968	1.27114	-0.846173	1.15575	0.238112	0.0855735	1.04758	-1.04378	0.797293	0.809626	0.295209	-1.30955	-0.776822	0.159656	1.30024
3.10131	-3.16328	1.63556	2.71854	1.67398	0.0891144	-0.805112	1.2081	-0.683169	2.06403	0.0395838	0.24246	0.87924	-1.51743	0.204002	-0.726963	-1.11301	-0.00829693	1.13152	0.33882	-0.906865	-0.0799463	0.450197	0.118306	-0.219346	-0.151458	1.13295	-0.980464	0.972588	0.237375	0.251989	-0.41877	0.122512	-0.321895	1.08089	0.684506	0.37146	-0.943427	-1.09115	0.825387	0.660698	-0.400483	-0.128348	0.0501113	-1.27254	0.193142	-0.0543514	1.5354	-0.189696	0.370162
11.3612	-0.695423	1.83256	0.828764	1.46828	0.817398	0.310109	-1.0885	-0.28225	-0.26741	-0.359799	1.35096	0.978241	0.0562539	-1.33923	-1.30824	0.525187	-0.959667	-0.828819	0.106563	-0.511684	0.0157901	0.0763693	-0.204388	-1.27878	0.336132	0.400903	0.0570151	0.422047	0.955916	0.311989	1.93407	-1.05786	-0.225595	0.551914	0.540564	0.923799	-1.09181	0.786721	0.138648	-1.95024	0.032076	-0.924506	0.386466	1.15348	1.33565	0.89618	-0.0237741	0.153752	0.00553727
0.256304	-0.772815	-0.816621	1.70253	-2.20139	0.0423593	0.558043	0.973915	0.794977	0.629149	0.782009	-7.39777e-05	-0.8614	0.223618	1.65199	1.06604	0.695642	-0.588328	-1.63039	-0.17076	0.206714	0.890807	-0.212391	0.376917	-0.900373	1.0924	-1.41865	-0.144821	-0.654017	-0.252135	-0.847846	-0.210911	0.782981	-0.280894	-0.0686881	-0.024929	1.03038	0.608256	1.52313	0.16697	0.263488	0.126409	0.631368	2.17569	-0.876454	-0.472358	0.00976267	-0.469726	1.10365	-0.167
3.11395	-1.69304	3.05683	-0.898445	0.948534	-1.64763	0.928392	0.762373	0.349342	0.307856	2.51776	1.26996	-0.246138	-2.8245	-0.190231	0.272997	0.635892	1.29713	-0.323034	1.19341	1.22723	0.308194	1.05001	-1.35979	0.648356	0.407607	1.47658	-0.822625	0.381707	-0.500687	-0.596754	-1.48212	0.828397	-0.314784	0.102307	-1.81557	-1.44054	0.685364	1.2066	-2.05418	-0.34841	1.15859	-0.141601	0.623801	2.05395	-0.105004	0.160128	-0.862256	1.95453	0.127704
17.5919	1.6412	0.124183	-1.44785	-0.648438	-0.33232	2.00902	2.80038	1.25601	-1.02464	-0.462392	1.69428	0.527372	0.493524	-0.0898725	-0.551714	-2.09803	-1.99248	0.434691	-0.205894	-0.515174	-2.54783	-1.76035	0.748034	0.592827	-0.483266	-2.9375	0.535393	0.0410047	-1.14816	2.18187	-0.707589	1.11342	0.468652	-0.810836	-0.226744	0.533941	1.72721	0.432657	-0.834318	0.116083	-1.62138	0.429727	1.53231	0.105084	-0.117383	0.356869	-1.45912	-0.203911	1.44492
1.14009	-3.40071	1.01071	0.152166	0.22806	1.53554	-2.77137	0.460808	0.787942	-1.59926	-0.81733	1.77735	1.28933	-1.07779	1.14543	-0.702391	0.579614	0.513173	-0.630962	1.21038	0.233809	-0.0694726	0.672226	1.73125	-0.428983	0.52897	0.619132	-0.342251	0.251016	0.211135	-0.573987	-0.689386	1.085	0.486044	0.372894	-0.823297	-0.609325	-0.480644	-0.67705	-0.787993	-0.430172	-0.342139	-1.54483	-0.387635	-0.53108	1.95126	-0.522075	0.294757	0.79735	-0.0291968
-1.74621	-0.761782	3.30593	-0.0488738	1.56994	2.06133	-0.574771	1.12781	-0.226359	0.481536	-0.642313	1.48739	-1.51729	0.178917	0.00933069	-0.226695	1.39386	0.829869	-0.526585	-0.389515	0.453421	0.369455	0.0137116	1.34858	-0.687364	-1.18459	0.351136	0.738861	-1.44395	-0.324282	0.134152	-0.278275	1.44184	0.707313	0.307041	0.516995	0.509313	0.583425	0.548608	-0.889224	0.710558	-0.522051	0.902646	-1.39282	-0.211735	0.852037	-0.893459	-1.86359	0.389371	0.51359
-10.587	-4.22866	-1.65117	0.702806	1.92781	-0.283331	-1.18746	-0.300281	2.18078	0.378333	1.63263	-0.221258	-1.0962	1.30362	-0.860537	-0.114391	-1.83559	0.931649	-0.39138	2.38718	-0.310026	0.222897	0.00337465	-0.146706	-1.02036	-1.21428	0.374796	-0.600149	-0.823426	-0.0701067	-0.148734	-1.40282	-1.72839	-0.533723	1.06499	-0.368905	0.190339	0.38865	0.963466	0.827891	-0.01049	-0.467144	0.695021	-0.503946	1.57245	0.544078	-0.273598	0.860115	0.22216	0.51295
-4.41791	-2.43156	2.82285	2.98221	2.59135	1.85625	1.03881	-3.46305	-0.357002	0.0288577	-0.325717	-1.15449	1.43759	0.447322	0.703808	0.341551	0.43166	1.41758	-0.223982	-0.0983727	-0.36384	-1.03594	0.782975	0.805508	-0.123621	-0.362841	-1.19864	0.678608	0.0874295	-0.828355	0.092026	-0.218313	0.101255	0.17856	0.993183	0.997282	0.638382	0.176147	-0.550109	-0.137871	-0.561831	1.51831	-0.0307385	1.0063	-0.14623	-0.0105842	-0.383153	0.118966	-0.288506	0.552228
3.37826	-4.5964	-0.467753	1.90486	-0.380709	0.086784	-1.0349	0.58895	1.3318	-1.54946	1.32397	1.7697	0.931069	-2.20517	-1.92233	1.0225	0.17468	0.87879	0.849975	-0.0162047	-0.312092	0.615991	1.05222	-1.16144	0.0086943	0.442327	1.01213	0.280759	-0.58614	-1.42902	0.581425	0.631324	0.20387	-0.902823	-0.395868	-0.117927	0.902745	0.0951177	-0.388098	0.311755	-0.65928	1.03897	0.617647	-0.395634	0.734027	-0.201641	0.208912	-0.291891	-0.87147	-0.482126
5.333	1.20296	1.11121	3.0079	-1.64008	-2.01719	-0.839239	0.933582	-0.292839	-2.81218	1.15737	-0.868372	0.869248	-1.84144	1.07922	-0.0149226	0.588131	-0.62872	1.64138	0.032339	2.55969	-0.407356	2.35531	0.758941	2.12321	1.23544	0.363632	-1.00885	-0.664507	-0.114966	1.07755	-0.119145	-0.949933	0.273583	-1.3438	0.0892867	1.17502	0.244055	-1.49704	0.0656514	-0.459731	-2.06188	0.0561096	-0.0150099	0.219982	-0.704025	-0.0836794	-0.526304	0.987765	0.771082
16.8567	4.95558	-4.14416	1.97304	-0.157413	2.36944	1.34635	1.34107	1.80492	1.12857	2.31063	-2.04537	3.16548	-0.250012	0.117168	-0.60732	0.212263	0.571119	0.447207	0.771953	0.378582	-0.585108	-0.120316	-2.03787	-0.258937	-0.63116	-0.0398972	-0.336844	-0.989294	-0.947779	0.33823	0.168152	-0.233062	1.33498	1.05401	0.19461	1.55115	0.958269	-0.883192	0.125023	0.0468107	0.169137	-1.26111	-0.581998	0.373614	0.202765	-0.33605	0.0777337	0.482246	-0.738281
15.5336	-2.28024	1.27029	-1.14012	0.113224	-0.623585	0.596304	1.0813	0.0232414	-0.310561	3.02085	0.723701	0.110783	-1.79664	-1.95171	-1.51788	-1.36873	-0.411083	-0.637773	-0.136513	0.0652019	-0.0426425	-0.240506	-0.655368	-1.08958	1.33953	1.92078	0.10153	0.280791	-0.485992	1.88379	0.0574012	0.872155	0.0160784	0.314913	2.27474	-0.447785	-1.37984	0.992946	-0.3135	0.927543	-0.937965	0.150159	0.664918	0.133267	0.572129	0.615957	-0.676296	-1.09239	0.00570717
0.0557777	-3.6362	2.24051	0.380444	2.84245	0.670312	-2.22733	1.86921	-0.12542	-1.50481	-0.667991	-2.70584	0.438079	0.0605382	1.14408	0.155976	0.143683	-0.320234	0.80054	-0.303008	-0.211842	0.371239	-0.180373	-0.827645	0.701241	-0.0456032	-0.54768	1.64077	1.47947	0.776814	0.743092	-1.36718	1.58307	0.264557	-0.452219	-1.79082	-0.285189	0.142615	-0.58009	-0.424338	0.128701	0.195533	-0.232945	0.0386066	0.529364	0.862186	-0.916038	-0.0417014	-1.58926	-1.16036
28.4064	-0.452763	-2.44341	-5.01564	-0.555574	-0.0753043	-0.975006	-0.0879968	-2.0255	-0.991759	1.05897	0.357393	-3.18196	2.09835	-0.927093	-0.494166	-0.942087	0.0611699	2.6341	1.90077	3.1791	-0.43547	-0.681874	-0.815652	-0.29614	-1.34041	-1.3525	-0.664987	1.67089	0.559952	0.537137	0.0288451	1.4557	-3.45997	0.970731	-0.86525	1.0705	-1.16795	-0.992115	-1.69115	0.598048	0.066445	0.967053	-1.00739	-0.289882	1.53179	0.157963	0.173426	-0.908351	1.73897
-2.40351	-0.305201	-0.79566	3.09662	1.10033	-0.690565	-0.168698	-1.29956	-1.37009	-0.30137	-1.59628	-0.342841	0.478015	1.14766	-0.194143	-2.46161	-1.08218	0.0296159	-0.0112464	0.132936	-0.514638	0.818175	0.167626	1.04076	1.3652	-1.06252	-0.621011	-0.0844526	1.02573	-0.250341	-0.581559	0.33609	0.83659	-0.782392	-0.0343157	-0.146041	0.0955839	0.65086	0.467862	0.0534431	0.604402	0.297526	0.215032	-0.820475	-0.81504	-0.02304	0.566648	-0.902419	-0.261421	0.709649
-0.979345	0.0699094	3.56851	1.09544	0.89172	3.52421	-1.35704	2.07965	3.31558	-0.129791	0.217657	-0.742312	-0.155646	-1.53934	-0.238767	-1.63232	1.20744	1.30876	0.683009	2.29291	-1.7612	0.347156	2.05395	-1.73744	0.120883	-0.838167	-0.040332	-0.56502	-0.226853	-2.42994	-0.484401	0.208024	-0.406845	1.1108	-2.08205	-0.630628	0.558345	0.346609	-1.35279	0.305294	-0.649016	0.460927	-0.0237823	0.163998	-0.992679	-0.351337	0.31083	0.940437	0.0335549	-0.125878
-1.39791	3.15853	1.60535	1.90653	-0.102188	-2.20079	-0.00685285	1.78307	2.82491	-0.0921495	-1.16518	0.0835114	-1.79978	1.06446	0.108169	1.19263	0.767845	0.542379	-1.00499	0.803256	1.47312	0.60188	1.07136	-0.447867	0.19364	0.604115	-0.574892	1.62007	0.610178	-0.987314	0.399975	0.720713	1.7725	-2.21671	0.861265	-0.323051	1.18756	-2.17857	-0.505717	1.24947	-0.389682	0.153839	-0.570187	-0.338726	0.271334	-0.845776	0.564854	0.0384043	0.715464	-0.147436
-3.43822	-5.53608	0.924698	0.78137	0.28623	0.123371	2.6835	1.99919	-0.330869	0.548973	-1.04306	-0.456483	0.375971	-1.57036	-1.16061	0.250657	-0.976566	-0.466911	-0.909849	1.59537	-0.357641	-0.0643816	0.308482	-0.536514	-0.777462	0.542071	-0.24638	0.645726	1.2324	-0.814763	-1.49582	0.847586	0.738939	-0.247369	-1.41919	-1.12318	0.869617	0.00678238	-0.0536001	-0.338133	0.400939	-1.29355	-0.835277	1.61498	0.549869	0.330639	0.566069	-0.230882	-0.657057	0.175696
-2.13152	1.53851	-0.532995	1.1381	-0.791441	-0.679897	-0.00815464	0.434328	-1.45883	-1.49224	0.613681	0.728896	0.113802	-0.1727	-0.700647	-1.82847	-1.6666	0.106399	-0.0392813	-0.198839	0.7147	0.336196	-0.748855	1.52054	0.89021	0.241506	-0.271334	-0.818158	1.22513	-1.90308	0.0131013	-0.250362	0.654833	0.00395373	0.943322	-1.62587	-0.506074	1.39041	-0.479322	-0.0808682	0.288046	0.358728	-0.591401	-1.4406	-0.0617798	-0.482133	-0.560654	0.374069	-0.531875	0.585947
-2.51066	-3.30837	0.792127	-0.507369	1.36817	1.00231	1.29629	-1.91332	2.09479	0.37051	-0.451637	-0.303355	0.624497	-2.16739	0.730949	0.861088	0.707609	-0.0112337	0.404977	0.0638676	-0.731406	-1.54635	-0.203535	-0.631801	0.312395	2.03627	0.411728	-0.133215	0.467732	-0.446275	-0.845867	-0.675461	0.348507	-1.20316	-0.127389	0.680688	-0.421785	0.0757962	1.51215	-0.510986	-0.346998	-0.156528	0.790161	-0.219542	0.749156	0.775165	-1.82059	0.907431	0.247473	0.105613
2.2645	-0.458392	0.330286	1.26704	-0.530058	-1.12982	-0.567268	-0.100469	0.879341	0.329451	-1.43902	-0.514275	-1.02344	1.33222	-0.732048	0.575713	0.88698	0.0210445	-0.567511	-0.0155819	0.00564551	0.890451	-0.77756	0.707802	-1.12047	-0.380391	0.235079	-0.268846	0.718606	0.20383	0.542457	0.00213758	0.0193043	-1.12338	-0.268354	-1.35522	-1.37752	0.0251074	0.274147	-0.0356473	-0.170227	0.276162	-0.522953	0.185396	0.00290185	0.227846	-0.659944	-0.490797	0.279598	0.282237
-1.40248	-1.94046	2.02474	2.28875	-0.443908	0.348101	0.796845	2.07889	0.872689	-0.148948	-0.873107	-0.0844131	0.695766	1.78934	2.35411	1.72126	2.71832	0.537057	-1.16085	1.13964	1.09415	-1.12157	-0.832134	-0.61942	0.489049	-0.00394628	0.0319046	-0.538417	-0.441239	0.368811	1.89353	-0.791647	0.864966	-0.820306	1.09914	-1.15049	0.0192571	-1.66057	-1.16349	0.776525	0.303841	-0.340224	-1.16322	0.177327	-1.11588	-0.217499	-0.736669	-0.107316	-0.657761	0.915873
8.48206	-0.0262508	-3.60346	-1.10269	-1.29469	-1.7637	0.203138	-1.40583	0.0413686	2.04308	-1.378	-1.27319	-1.11144	-0.356669	-1.44362	3.20058	-1.79041	2.68331	-1.05825	0.178671	0.462656	-1.68092	1.00031	0.76478	0.735781	-0.280089	0.391984	-0.0248245	-0.564064	1.17148	-0.255772	-0.693958	-0.901187	-1.70249	0.348225	-0.652632	0.588075	-0.317244	1.65397	-0.368332	0.469556	-1.94283	-0.546432	0.200157	-0.8644	-0.159344	0.257191	-0.0490752	-0.352767	1.31754
4.12185	1.18528	0.367013	1.57166	-0.948878	-0.24804	-1.32001	-0.3594	1.28365	1.52115	1.05559	0.326603	0.399152	0.830687	-2.1248	1.16361	-0.508014	-0.174731	0.0344624	-0.812166	0.566583	0.677127	-0.6371	-0.0384584	-0.884532	0.162061	0.989374	-0.0640181	-0.655857	-0.559553	-0.893083	-0.112814	0.683836	-0.162774	-0.421659	-0.934057	-0.262933	1.40541	0.448398	0.21716	-0.436422	-1.75773	-0.528045	-0.0868692	-0.213877	0.0726434	0.782614	0.0907631	0.0129337	0.42748
6.31699	3.45362	-2.51295	2.54278	0.103522	1.57855	1.04692	0.774905	2.37555	0.260047	-0.0847213	1.36001	-0.0222716	1.14914	-1.47768	0.0831313	1.02029	-0.707945	-0.0288776	0.68909	0.614148	-0.806255	-1.28963	-1.44536	0.197493	0.84427	-0.74534	0.162499	-0.287736	-0.408955	0.711759	-0.223346	0.656882	0.410083	0.889381	0.895625	-0.228049	1.27796	-0.680429	-0.387817	-0.609368	-0.636415	0.751346	0.16827	-0.0811164	-1.62012	-0.547585	-1.2288	-0.54508	1.08328
-6.34432	-0.540641	-0.430397	0.937032	3.928	-0.0829319	1.15839	-0.956432	-1.48029	-1.30747	-1.03649	-0.0435638	-3.27659	-0.24773	0.907191	-0.594428	0.111928	-0.279145	0.722169	0.306025	-1.57539	-0.674991	-1.50351	-0.437906	-1.23713	-1.09413	-0.718649	-0.188352	-0.739505	-1.38531	-0.493319	-0.00732429	0.31579	0.235889	0.150506	-0.221362	1.67191	0.907345	0.334295	1.59381	-0.377389	-0.338403	1.766	1.37868	-0.623117	-0.861234	-2.00458	-0.677038	0.740397	0.0547956
-1.16133	-0.225909	-0.882104	0.276581	-1.13174	1.77271	1.06578	1.07892	-1.04906	0.524079	0.598314	0.461007	0.162117	-0.250875	0.039241	0.722283	-0.0460457	0.684378	1.01533	0.0562531	-0.425241	0.346235	-0.711363	-0.751062	0.182426	0.0367967	1.31454	-0.674182	-2.10703	0.669294	0.155734	1.22683	-1.17827	0.886099	-1.00394	-0.0440298	0.878027	-2.01904	-0.196557	0.0295941	-0.533274	-1.15136	0.843735	0.174007	-0.112695	-1.0069	0.625771	0.125137	-0.363926	0.19621
2.05632	0.357435	2.61499	1.9502	-0.575047	0.379751	1.42536	0.485453	-0.0185741	1.01113	0.330174	0.553326	0.13655	-0.292302	0.232819	-1.35269	-1.29644	0.71615	-0.363273	-0.0343641	-0.0338163	1.27028	-0.940504	0.628581	0.230889	-0.382891	0.54895	1.04406	0.267232	-0.844022	0.214001	-0.449527	0.446311	0.0310632	0.554488	0.498943	-0.0548038	0.397515	-1.55219	-0.0209655	0.87181	0.0968417	-0.520476	1.22645	-0.873646	-0.112905	0.138455	-0.0994829	-0.0563365	-1.38799
7.26078	1.77014	-0.597597	0.202532	0.939073	-0.0235561	-1.05331	-1.91933	-0.756016	0.902947	0.452097	-2.23953	-0.254119	-1.3623	0.569579	0.137507	-0.751534	1.45336	0.539626	-2.49677	2.1479	-0.687925	-0.457815	0.998586	0.184222	-0.00190825	0.201514	-0.760467	-0.39008	-0.340618	0.32282	-0.024095	-0.00322308	-0.0099683	1.75607	2.22814	0.682547	-0.229893	0.262304	-0.82064	-0.721471	-1.55725	0.0839366	-0.981828	-1.43789	1.27668	1.35746	0.678918	-0.32327	0.326547
[truncated: 363 more rows]
[truncated: 50 more columns]

## Sheet: kernel_0mm_parcels_400
PCA_1	PCA_2	PCA_3	PCA_4	PCA_5	PCA_6	PCA_7	PCA_8	PCA_9	PCA_10	PCA_11	PCA_12	PCA_13	PCA_14	PCA_15	PCA_16	PCA_17	PCA_18	PCA_19	PCA_20	PCA_21	PCA_22	PCA_23	PCA_24	PCA_25	PCA_26	PCA_27	PCA_28	PCA_29	PCA_30	PCA_31	PCA_32	PCA_33	PCA_34	PCA_35	PCA_36	PCA_37	PCA_38	PCA_39	PCA_40	PCA_41	PCA_42	PCA_43	PCA_44	PCA_45	PCA_46	PCA_47	PCA_48	PCA_49	PCA_50
[truncated: 608 more rows]
[truncated: 50 more columns]

[truncated: 27 more sheets: kernel_0mm_parcels_1000, kernel_0mm_vertex, kernel_5mm_parcels_100, kernel_5mm_parcels_200, kernel_5mm_parcels_400, kernel_5mm_parcels_1000, kernel_5mm_vertex, kernel_10mm_parcels_100, kernel_10mm_parcels_200, kernel_10mm_parcels_400, kernel_10mm_parcels_1000, kernel_10mm_vertex, kernel_20mm_parcels_100, kernel_20mm_parcels_200, kernel_20mm_parcels_400, kernel_20mm_parcels_1000, kernel_20mm_vertex, kernel_30mm_parcels_100, kernel_30mm_parcels_200, kernel_30mm_parcels_400 …]
